# Supplementary material for: A novel lncRNA-miRNA-mRNA triple network identifies lncRNA XIST as a biomarker for acute myocardial infarction
Source: Aging (Albany NY). 2022 May 10;14(9):4085–106. doi: 10.18632/aging.204075 (PMC9134965; doi:10.18632/aging.204075)
Supplement: Supplementary Table 2 [file aging-14-204075-s003.xls]

## Sheet: Supplementary Table2
Supplementary Table 2. Gene expression profiles of 97 samples.
Genesymbol	GSM843871	GSM843872	GSM843874	GSM843877	GSM843878	GSM843889	GSM843890	GSM843893	GSM843897	GSM843898	GSM843899	GSM843900	GSM843902	GSM843903	GSM843905	GSM843906	GSM843907	GSM843908	GSM843911	GSM843914	GSM843915	GSM843916	GSM843919	GSM843920	GSM843921	GSM843922	GSM843931	GSM843934	GSM843935	GSM843937	GSM843938	GSM843939	GSM843940	GSM843941	GSM843942	GSM843943	GSM843945	GSM843946	GSM843948	GSM843949	GSM843950	GSM843952	GSM843954	GSM843955	GSM843956	GSM843957	GSM843958	GSM843959	GSM843870
AARS	750.882	897.706	550.902	809.956	802.351	1462.27	765.287	675.645	609.881	654.732	833.168	731	855.427	732.412	602.408	439.412	537.088	520.384	606.891	767.183	605.708	644.261	443	672.722	771.377	971.439	984.727	638.707	380.387	1065.39	1456.17	707.351	596.003	532.091	767.696	544.808	627.228	665.451	536.562	557.057	631.857	926.394	997.347	1032.09	738.1	1098.24	704.143	627.94	377.377
AATF	336.897	428.601	305.168	311.449	317.189	404.353	266.677	344.862	330.837	338.122	368.588	353.384	274.565	360.22	370.905	497.078	446.16	366.806	429.021	331.296	390.601	389.875	307.619	374.055	317.546	350.815	416.677	297.332	375.841	310.703	420.719	297.09	303.499	437.808	343.678	332.482	357.403	301.315	579.467	375.343	334.242	357.072	433.724	280.34	429.659	415.538	417.386	414.029	367.93
ABCA1	1870	758.417	907.452	579.178	527.066	495.447	1395.65	739.525	717.277	715.957	1472.37	1023.67	543.25	633.147	761.127	1136.71	1405.29	613.871	817.432	1019.66	453.967	519.273	2721.51	936.474	582.885	1307.05	381.51	588.931	1689.84	744.015	581	336.897	1118.65	308.661	795.559	1122.52	1049.01	902.583	893.093	1166.81	750.882	1054.7	402.747	682.162	624.013	812.211	577.283	538.181	1777.77
ABCA13	14.5552	2.5761	100.163	-3.14956	-0.600511	7.84173	5.73441	-1.75112	4.55663	1.20101	3.91691	4.93072	49.7652	2.63253	10.3144	17.7132	-4.17403	-2.52289	-0.0699006	3.00174	3.35763	-0.633277	33.923	4.36306	-2.19062	-4.59152	6.85267	554.963	37.1747	-5.18226	0.252998	2.13105	6.27786	77.5233	15.634	2.75977	6.36826	8.60483	9.14022	7.84348	34.3166	2.78651	-2.49154	-3.27712	4.7696	8.82833	-3.5953	-3.14525	4.38134
ABCA7	158.026	162.615	132.497	98.4331	75.0582	128.612	187.891	207.807	156.023	169.496	112.273	261.928	150.393	262.242	158.252	284.717	155.882	146.584	200.629	158.718	161.85	171.596	144.592	203.61	158.348	177.533	93.0547	236.33	323.576	169.351	154.089	132.085	245.16	184.957	79.1629	172.732	76.525	130.766	584.582	142.479	63.2938	273.139	238.108	257.639	215.758	178.484	204.375	210.169	280.717
ABCB10	217.789	156.641	277.439	210.758	290.744	297.332	112.406	337.331	249.772	263.817	167.468	162.532	264.024	113.66	234.774	214.676	106.862	187.872	201.727	228.588	186.173	276.699	227.875	266.195	205.493	122.089	140.489	453.316	214.464	72.3357	136.64	209.249	274.875	200.372	207.516	130.387	677.53	167.528	90.8189	103.19	183.361	105.949	126.252	133.924	142.83	165.452	102.686	89.8871	195.453
ABCC13	31.8063	46.4454	51.0753	57.4226	79.4958	12.4585	121.596	47.7295	71.9828	80.7436	45.598	94.2192	50.3682	14.6693	60.6602	15.6912	24.2309	87.1045	17.4113	54.0681	18.5076	19.4046	78.2751	36.5268	65.5027	28.2095	49.5907	99.4613	24.3255	59.3862	15.4093	29.1012	57.7395	61.5407	41.0075	91.2564	322.975	24.4043	21.4726	78.5284	66.5644	41.1041	26.8845	40.8823	39.5385	14.2994	41.9202	46.7386	55.8502
ABCC3	272.771	352.909	194.191	319.963	189.424	124.278	157.24	67.5429	252.775	281.34	145.126	110.479	386.966	128.099	161.718	324.013	120.09	97.0088	325.21	175.777	147.554	173.184	132.2	134.589	251.648	146.245	174.776	71.7719	302.255	298.633	282.874	275.588	231.357	342.709	226.178	162.104	324.509	151.799	246.308	227.688	187.327	161.378	202.103	157.847	146.698	231.781	158.932	165.869	147.831
ABCC4	280.237	100.786	264.772	143.256	180.786	145.06	82.1405	159.801	146.958	159.584	187.427	131.256	239.223	132.665	186.533	194.392	74.2901	164.961	200.227	111.003	154.673	159.63	226.502	149.6	192.867	54.932	90.5024	162.589	97.4704	130.587	172.894	159.684	324.254	191.965	170.955	160.391	499.684	103.605	178.819	95.638	156.641	54.4066	122.209	117.764	184.001	105.274	82.5231	85.5392	209.964
ABCC5	204.728	193.656	190.259	142.692	136.871	95.1561	156.215	157.562	149.292	158.953	62.8384	234.29	170.385	219.772	173.97	282.983	248.906	260.804	188.313	238.559	145.482	167.501	192.102	221.327	103.848	149.855	137.153	173.487	166.138	139.43	196.474	172.008	211.565	148.189	255.743	265.739	126.153	278.081	163.667	229.785	137.873	204.818	117.843	141.086	234.614	116.336	199.901	210.205	141.425
ABCE1	94.0513	151.741	235.462	149.23	127.949	333.961	82.9809	185.916	101.417	112.753	150.652	68.059	156.387	90.2313	97.1064	149.685	33.5476	104.372	186.294	149.633	109.57	121.791	197.443	206.519	100.884	103.289	123.06	130.047	113.5	71.7646	170.642	119.372	122.442	96.043	129.649	71.0037	94.0513	110.963	13.7314	50.9589	91.8906	47.0329	115.646	37.598	54.6701	126.804	35.275	43.3616	40.3281
ABCF1	702.445	704.512	832.629	722.752	637.626	531.835	793.073	627.94	582.595	577.94	711.879	745.304	702.862	903.17	588.639	422.786	512.73	581.602	527.707	670.881	623.354	692.041	662.344	635.162	787.24	931.109	715.069	548.2	484.592	924.366	1144.04	676.787	575.864	479.813	594.716	592.747	721.127	684.72	761.614	599.474	629.659	920.53	877.183	970.769	1120.56	739.525	868.347	859.796	417.968
ABHD10	171.072	179.851	129.309	182.612	164.961	193.247	227	165.887	177.711	151.99	136.267	233.27	147.54	144.45	148.992	124.512	153.687	99.8221	166.362	184.892	130.553	110.282	100.362	164.383	176.843	199.67	165.059	142.282	143.517	148.897	180.418	150.49	133.924	106.349	139.712	161.39	97.4704	205.63	173.601	100.849	125.203	233.028	217.05	263.337	177.478	182.256	240.401	252.097	132.416
ABHD14A	219.024	220.073	75.1557	177.016	120.889	187.247	180.593	146.82	124.352	105.274	114.886	195.06	152.618	144.502	132.047	152.467	168.445	103.19	212.951	148.382	162.637	149.685	86.5338	195.453	201.539	197.767	248.793	111.397	74.0462	233.952	216.182	225.798	119.514	203.882	173.166	123.947	148.052	171.179	132.25	156.046	157.043	183.361	238.268	271.32	234.107	244.826	215.554	214.894	102.068
ABHD14B	71.133	154.027	75.9454	89.5112	51.7733	111.397	69.2636	112.617	86.3645	86.9847	47.1062	106.283	63.3096	77.7775	57.8457	139.99	64.2939	80.3736	198.36	74.5758	101.158	103.353	60.0971	193.72	67.4677	106.349	111.179	64.6618	47.3083	82.1405	109.837	88.2104	73.8164	140.902	79.9712	42.5609	68.1475	77.7064	95.0658	69.4828	73.296	77.258	114.372	117.948	89.2722	103.887	71.2626	57.0097	40.2
ABHD3	795.559	633.831	1124.13	700.33	795.07	688.115	769.93	412.208	603.769	566.147	1232.97	870.159	751.302	952.99	815.948	686.834	875.966	571.76	527.066	679.703	639.831	653.281	1462.27	513.051	740.544	640.501	516.943	481.96	1068.03	717.666	694.028	729.282	723.902	481.506	714.675	1585.87	640.859	825.062	757.91	781.732	738.504	875.35	496.382	571.167	803.852	629.992	678.302	718.51	1105.97
ABHD5	423.587	554.106	636.922	510.015	465.572	499.165	308.914	355.385	297.792	309.718	555.938	331.568	448.547	537.335	535.143	1788.54	923.729	414.619	904.529	528.78	362.82	371.542	841.05	810.519	427.454	279.901	500.399	570.614	752.974	310.95	243.133	519.55	488.467	569.429	658.827	861.683	471.297	563.424	432.227	605.708	896.453	310.825	394.61	148.102	239.754	518.24	298.042	327.147	1005.75
ABHD8	180.085	124.995	209.815	137.051	99.4307	143.056	219.318	170.052	133.786	118.773	103.946	108.648	158.622	140.627	190.217	216.978	174.412	93.7549	120.043	154.631	111.568	96.5557	148.382	153.199	185.596	269.225	187.493	152.234	217.957	256.384	194.319	171.126	154.53	178.101	171.589	199.96	74.1181	166.049	143.982	168.009	157.395	140.583	144.401	147.54	179.354	148.237	204.573	181.337	151.456
ABI1	307.954	343.475	347.96	294.084	342.575	382.032	164.58	389.087	346.627	427.792	292.85	237.751	320.127	243.33	322.129	455.238	315.716	404.081	323.77	373.443	357.452	478.753	351.997	400.022	236.908	239.353	299.885	336.653	329.299	162.696	209.314	291.034	298.517	317.419	328.875	306.516	223.703	296.168	178.565	259.78	252.448	180.131	265.346	171.598	181.809	291.071	187.502	229.082	370.532
ABI3	178.442	354.438	206.099	270.213	301.958	226.112	283.161	270.312	252.097	208.234	374.542	305.696	230.2	360.935	184.892	199.735	253.164	250.434	312.953	190.978	300.558	254.584	137.01	315.671	335.515	299.891	402.02	213.015	320.848	394.248	258.21	296.634	184.277	237.169	295.949	178.502	268.807	338.841	211.546	221.588	314.096	188.635	550.673	263.048	221.135	326.775	347.87	320.065	187.374
ABLIM1	335.072	482.484	325.036	412.117	352.252	413.04	200.755	323.335	379.264	400.209	129.306	237	420.216	252.659	230.422	191.39	124.268	274.759	440.865	319.564	414.181	458.325	164.92	421.184	313.832	320.715	355.421	304.271	79.6602	261.399	428.076	334.629	344.722	465.438	389.555	220.973	333.64	198.041	224.891	150.346	185.892	266.956	331.721	319.42	279.036	261.359	198.357	187.871	141.482
ABP1	76.2316	47.2821	37.3008	7.87882	28.2099	48.5196	56.5095	79.4394	42.7025	51.5953	10.5345	28.6653	14.3096	23.731	25.8725	38.8403	64.9146	23.3288	19.6098	73.7507	28.2778	31.4508	7.16235	80.6889	28.4177	18.6107	82.0683	43.3991	15.2563	158.19	27.8016	103.887	53.3434	66.7815	38.7172	5.77846	20.7533	40.293	115.679	46.574	5.36307	42.9863	26.8865	33.3181	484.109	32.8744	27.54	40.847	43.9571
ABR	607.82	462.66	219.056	551.718	514.749	241.365	414.036	471.843	446.83	432.998	518.748	473.271	525.415	427.421	548.082	572.76	540.363	491.117	390.199	543.022	493.148	499.555	268.125	427.041	568.165	440.403	453.341	477.539	532.9	432.817	361.603	469.285	471.632	420.13	489.331	405.384	413.608	432.091	482.575	482.14	515.413	466.231	470.685	477.333	563.751	447.61	507.671	534.528	626.513
ABTB1	3396.65	3755.13	3430.5	2937.38	2401.02	2024.13	4100.58	2077.5	2492.98	2170.4	1993.34	2730.64	2957.22	4254.67	2828.52	3871.13	5103.71	2740.2	2492.98	3056.24	2474.64	1961.87	5056.65	2436.86	2916.79	3732.41	4321.04	2196.73	3102.53	4408.23	3045.35	3090.07	2564.49	2921.73	3287.87	5653.01	2926.47	3540.37	2490.14	5704.39	3701.61	2283.43	3504.16	1717.2	2283.43	4670.52	2858.38	2824.42	4273.9
ACAA1	861.683	711.879	824.595	662.764	717.277	740.028	1194.65	978.081	740.544	768.107	778.461	1338.1	744.015	1196.64	809.47	1182.18	1257.92	710.48	708.775	734.883	824.077	772.931	949.629	915.25	637.287	1054.7	767.696	979.559	893.093	1384.8	811.064	656.93	1050.65	767.696	594.39	1340.79	785.685	779.874	2246.17	1239.61	774.83	1544.74	942.133	1552.5	1260.28	873.623	1347.04	1332.55	736.729
ACAA2	190.649	266.832	177.075	219.1	250.434	339.691	220.669	281.801	252.907	207.93	255.494	246.7	170.314	254.671	242.201	262.933	230.027	209.815	354.097	180.786	238.457	254.487	143.302	311.449	301.698	223.038	261.488	227.074	191.342	283.161	287.045	288.394	199.521	232.691	228.979	170.492	187.801	279.082	192.805	184.712	300.905	341.262	228.737	289.13	322.791	262.226	243.035	260.261	127.521
ACACB	129.014	104.14	83.0866	138.801	109.667	80.6889	94.262	159.74	100.293	126.529	46.5091	85.5922	136.312	121.938	78.3693	118.026	91.1431	101.938	99.546	154.34	111.982	128.163	59.3506	106.827	159.186	160.445	104.705	71.9908	60.7223	78.0056	116.455	105.341	117.692	68.6101	139.9	52.6356	76.2053	96.3126	50.4142	52.3936	108.648	81.8335	124.945	117.692	130.957	153.923	75.2024	93.3862	46.3067
ACAD11	120.752	226.331	252.692	192.746	159.186	193.461	109.701	145.106	163.288	178.76	111.944	103.317	220.464	200.632	155.075	123.575	97.1725	112.683	165.622	180.085	181.031	170.691	176.196	191.654	182.323	228.654	174.255	204.772	73.5493	161.39	188.562	180.715	106.827	134.334	166.735	129.057	129.014	162.083	102.169	101.972	70.7471	131.477	225.414	102.365	88.5641	203.882	71.7401	85.1839	147.186
ACAD9	132.17	158.292	95.7978	121.681	104.578	105.44	206.389	120.357	108.422	111.906	142.83	129.929	112.437	186.036	124.74	152.029	156.046	110.963	122.209	101.353	123.265	127.488	74.8027	161.181	171.638	213.433	133.326	123.492	112.753	140.082	182.916	162.188	88.9648	121.185	118.383	93.8091	120.664	136.094	144.746	137.097	107.657	148.573	182.387	172.281	127.641	154.288	148.756	116.757	103.425
ACADM	168.96	202.667	380.521	162.807	195.06	654.045	154.387	197.505	213.163	284.012	189.099	147.734	221.965	163.074	181.16	101.319	160.92	183.702	136.267	200.153	255.212	314.213	266.677	137.649	136.882	186.359	217.05	178.101	154.184	135.147	287.708	154.184	173.166	101.417	150.305	139.401	150.345	150.938	60.0971	116.307	122.485	133.457	183.084	104.992	129.222	246.947	69.9552	88.9648	83.4069
ACADVL	2147.84	3417.27	815.424	2483.01	2407.68	3396.65	2320.07	2382.72	2175.92	2280.13	1444.44	2330.05	1826.98	1903.98	2276.93	3035.86	2803.71	1928.7	2916.79	1928.7	2283.43	2303.94	762.059	2492.98	2280.13	2270.89	3322.24	2001.01	2122.73	2274.04	2190.39	1862.49	1959.52	2401.02	2012.06	1964.73	2283.43	1881.38	3499.14	1808.6	1833.94	3472.43	3056.24	3410.72	2631.34	3056.24	2613.98	2644.16	1489.94
ACAT1	283.918	277.625	235.993	275.406	302.885	442.145	192.746	325.725	368.245	393.437	375.343	244.615	334.677	301.209	333.27	204.297	185.018	300.334	264.581	250.258	296.268	321.23	222.398	279.293	318.175	283.694	305.302	344.55	307.73	200.227	530.475	381.51	330.995	282.936	259.232	184.201	396.73	346.065	244.901	162.137	267.807	263.817	238.625	265.25	403.819	315.918	227.242	224.551	157.946
ACAT2	242.367	175.042	274.978	235.993	257.667	313.076	132.004	220.845	261.396	277.957	301.062	213.09	282.525	213.728	231.313	173.446	119.547	199.735	244.901	236.326	275.406	289.243	188.697	232.855	228.247	184.061	213.433	204.573	172.614	190.485	249.699	233.524	206.037	209.318	269.328	175.972	226.891	250.822	167.345	120.043	247.145	228.654	215.858	232.212	262.226	186.036	194.462	200.303	135.509
ACBD3	368.245	289.467	404.353	422.246	358.84	645.765	230.974	475.624	374.542	371.542	362.358	246.856	354.739	272.441	349.965	376.866	271.641	391.11	353.943	409.135	385.262	453.52	425.847	352.292	304.07	234.173	352.292	406.165	488.707	209.742	299.891	354.739	335.9	330.077	386.721	256.031	313.602	360.331	231.148	267.125	312.34	230.974	240.476	230.289	222.132	293.554	234.774	247.75	373.268
ACCN4	146.276	151.039	144.45	194.392	160.92	143.477	258.876	135.887	174.255	131.598	150.885	193.525	169.899	130.008	205.268	139.445	202.133	167.729	138.942	176.612	136.094	117.725	162.027	108.249	149.685	174.691	145.939	106.175	168.166	212.366	115.325	156.149	216.271	170.807	195.765	175.701	253.349	101.284	233.178	222.816	133.326	200.764	137.051	243.55	190.275	158.773	229.063	259.425	196.466
ACD	134.175	180.646	48.8476	90.8189	73.5263	134.42	88.7529	91.973	131.175	101.417	91.6149	92.3386	73.5954	85.5087	76.938	196.536	135.592	130.466	197.636	96.6517	153.199	153.728	62.8912	153.687	115.506	83.7649	165.103	76.3338	87.0368	83.3546	68.2289	123.105	77.5692	268.624	103.492	72.0119	119.931	119.044	96.218	84.3426	104.437	106.589	151.69	98.8331	100.105	167.677	109.598	101.026	115.02
ACIN1	160.391	275.617	191.342	204.224	166.476	233.357	280.237	290.644	255.314	267.604	193.988	293.346	172.671	335.093	193.645	331.699	384.475	333.27	347.619	209.964	266.677	242.109	219.835	353.816	148.052	233.445	271.738	337.451	360.22	339.552	318.826	131.933	261.488	223.665	190.978	270.914	187.624	157.993	671.614	236.24	194.203	365.146	414.793	331.815	339.691	258.876	359.446	355.801	167.576
ACLY	512.73	525.481	675.645	700.687	988.345	683.474	401.292	879.803	710.48	731	728.888	659.943	646.908	545.366	599.207	503.763	397.069	742.574	491.714	676.379	860.392	913.928	658.502	584.867	622.659	347.87	470.094	644.988	694.774	580.648	647.346	653.281	757.91	744.443	699.886	534.054	724.361	669.743	704.512	295.46	629.313	511.944	465.787	571.76	510.599	402.747	538.181	544.228	518.529
ACN9	132.931	77.7064	119.044	106.206	118.344	164.211	86.695	81.3878	97.6112	106.283	208.234	119.818	123.023	115.325	153.923	141.644	215.858	70.9011	98.1388	118.544	91.5206	108.946	138.326	116.085	105.541	132.888	137.144	116.422	82.1672	72.5827	109.732	106.511	110.811	115.465	83.4875	116.757	53.6952	113.261	198.754	212.675	127.905	154.768	100.55	92.6716	120.13	115.897	81.5978	94.8877	84.8581
ACO2	128.479	190.842	129.26	211.329	147.69	190.53	253.931	150.118	131.933	103.317	192.392	203.427	159.027	206.95	141.955	113.296	174.126	129.476	128.367	145.902	129.764	140.039	116.917	116.231	152.666	193.72	167.288	217.957	217.55	242.703	273.24	138.592	181.275	165.222	159.584	178.76	226.574	168.009	211.805	181.949	115.506	194.319	195.128	242.514	172.738	194.268	200.921	190.089	114.511
ACOT9	255.758	216.978	321.771	300.448	398.41	346.368	284.114	282.07	255.935	306.385	534.599	318.826	273.727	281.3	334.806	217.332	354.889	239.843	202.93	267.413	200.764	257.201	288.286	167.468	361.555	347.233	301.958	198.36	351.405	405.295	271.219	269.742	273.136	244.688	225.872	447.118	445.789	334.677	404.154	220.539	337.986	399.26	239.843	281.608	402.926	306.051	238.859	227.777	379.675
ACOX1	287.608	113.578	339.932	239.649	190.249	145.421	192.646	175.701	167.578	177.145	227.986	221.219	210.9	167.071	370.019	314.05	304.707	385.746	184.31	352.999	201.746	252.88	415.443	171.151	161.411	150.133	153.637	201.115	355.078	135.374	96.9615	210.698	246.044	177.582	284.983	513.717	190.891	262.495	216.637	272.69	357.039	165.497	151.005	126.99	129.189	132.468	183.101	196.207	428.551
ACP1	353.816	447.365	801.376	669.432	698.954	575.582	361.203	445.427	565.801	601.326	402.926	525.216	515.124	458.037	502.563	265.445	252.692	505.256	349.028	415.93	548.2	543.883	448.351	416.501	519.55	405.808	355.664	564.011	289.13	385.749	597.664	438.245	795.559	426.658	453.52	483.385	2134.16	464.115	316.471	367.78	418.18	469.584	372.486	483.137	409.493	285.59	429.44	423.974	260.261
ACP6	99.9791	48.7138	103.463	62.3386	65.7345	136.267	60.2071	55.4711	76.4739	80.3137	64.9943	75.7137	83.7072	73.8164	83.9644	92.7871	75.4548	47.0923	64.4093	69.2189	72.7908	83.2395	43.7004	72.3614	72.8146	111.151	63.5693	155.347	58.0695	78.5202	112.224	78.2161	71.2171	60.6431	70.467	111.114	57.2692	88.8304	92.2824	135.012	78.6644	75.667	67.9086	74.3367	132.585	87.9269	44.2919	48.8976	94.7349
ACPL2	106.905	110.708	71.9217	68.0158	120.966	59.0581	46.7552	49.964	70.2432	82.6959	58.8886	75.2914	83.4069	64.895	80.1698	149.978	161.639	80.2919	64.5116	150.743	67.3794	86.5857	189.461	103.546	49.5756	60.5828	86.4464	60.9524	79.2621	57.0581	41.2554	87.0896	55.8975	102.038	96.8745	201.539	66.91	51.7249	103.975	140.671	71.114	62.0849	60.9148	52.8345	115.249	58.0695	95.0658	79.9712	154.387
ACPP	96.1282	151.84	228.247	121.379	111.763	105.183	71.8798	191.395	80.0886	119.309	87.0113	125.326	171.54	96.1563	134.458	128.034	191.092	86.7204	142.332	178.99	152.183	150.072	180.541	148.709	95.7374	112.963	186.594	162.288	216.77	73.2227	45.711	104.306	114.748	168.226	112.581	240.322	57.3977	137.144	108.356	136.596	142.282	54.0194	155.075	87.9269	72.3828	142.12	77.1666	69.6299	114.194
ACRBP	1206.86	886.913	566.147	824.077	483.625	487.065	548.539	490.58	1108.54	1068.91	797.655	451.649	956.465	473.495	813.776	877.827	566.462	801.376	1175.73	347.358	725.301	676.034	243.98	656.93	903.17	523.515	784.727	373.909	483.865	488.923	655.85	880.833	890.579	629.009	726.537	279.723	826.659	681.044	665.076	746.708	859.796	520.123	600.075	594.39	938.876	708.775	653.281	528.49	739.016
ACSL1	3652.13	1245.73	3227.22	2267.96	1618.26	1966.68	2407.68	2784.93	1630.58	1487.19	2463.14	1209.22	2102.11	2726.14	2869.39	4005.62	4365	2894.19	2581.1	2602.14	1576.07	1072.79	6151.17	2576.22	1984.12	2310.51	1625.17	3932.81	5317.41	2347.41	1611.65	1908.11	4014.95	1826.98	2205.47	3716.6	913.928	3158.25	1844.98	5546.4	2863.25	1087.27	1217.02	613.283	1003.74	1733.14	1046.6	1126.6	5256.07
ACSL4	278.311	196.257	287.402	249.155	280.188	377.351	191.689	506.124	225.876	301.247	379.497	163.092	222.108	205.032	246.733	627.058	351.7	360.58	366.469	245.293	274.709	265.959	421.106	460.755	281.267	166.908	214.044	413.985	541.741	130.798	141.067	232.824	509.224	315.885	248.629	338.238	217.091	232.83	215.578	321.602	245.426	158.459	171.854	87.1178	138.766	193.983	121.271	144.825	632.122
ACSL5	254.163	304.891	160.772	276.274	287.807	160.345	295.543	303.15	194.853	201.984	308.395	269.276	297.157	241.081	222.434	132.304	142.182	221.047	180.836	234.364	195.22	199.061	156.745	203.437	261.141	282.154	225.845	197.07	178.325	265.776	323.179	269.404	214.078	183.034	297.04	181.608	219.766	295.091	164.567	172.88	219.241	251.856	329.746	279.679	283.119	240.379	241.552	244.136	157.552
ACSS1	239.994	196.725	227.461	253.718	219.166	496.86	172.614	343.678	271.43	312.48	238.013	278.991	243.379	323.048	178.819	208.776	123.642	282.173	226.808	242.514	352.764	350.087	136.596	244.615	288.819	204.35	159.968	312.102	247.224	292.768	401.84	217.121	235.633	263.141	203.825	170.691	173.056	227.875	313.85	96.0972	174.023	263.923	252.48	473.495	376.341	194.203	306.912	277.957	151.317
ACSS2	273.947	375.255	362.439	288.347	210.701	213.478	395.24	238.27	206.347	206.872	296.626	269.898	294.524	333.938	311.067	274.319	470.49	248.742	308.866	260.627	215.974	228.416	375.521	237.556	240.227	333.632	350.973	278.548	356.075	269.179	282.813	197.557	293.624	222.853	208.803	304.694	200.09	223.058	521.167	387.408	206.296	340.51	360.754	289.372	394.684	392.276	343.908	343.597	348.45
ACTA2	251.722	594.716	338.397	269.532	354.889	220.845	471.297	389.204	254.319	232.14	371.863	437.41	210.554	670.454	370.097	273.529	628.347	124.164	260.631	424.184	271.134	264.681	285.477	297.926	185.916	400.96	150.699	208.001	291.991	769.93	335.515	558.62	500.399	125.78	190.715	396.895	337.851	219.166	405.808	525.998	273.529	396.895	488.467	195.453	257.404	350.087	168.96	159.027	521.615
ACTB	13549.3	20920	17413.1	17506	22226.8	19311.2	17306.7	17515.9	19008.9	18193.3	21195.2	15723.9	17813.2	18785.5	18071.5	16082.1	22745.5	20017.9	14468.6	16931.4	20500.8	20063.7	16772	15886.3	13388.3	15345.3	19162.8	17546.9	19722.9	19970.5	20709.1	12818.9	19499	18768.2	17495.9	21583.1	15399.4	13114.2	21803	17950.3	14702.3	17970.6	18642.2	17306.3	19878	19777.5	18492.1	18700.7	13575.2
ACTG1	2858.38	6508.05	4005.62	5874.27	9978.13	8698.6	9167.87	5737.73	5227.23	5363.81	5971.76	7877.18	8583.21	6830.43	9129.05	1240.87	9086.77	3908.69	765.867	7135.6	5874.27	7266.94	3800.7	572.689	3276.59	9731.52	6888.34	3666.03	3504.16	8429.52	8023.43	3322.24	5453.95	5507.83	3994.4	8698.6	7163.16	3276.59	5737.73	7466.56	4181	9777.65	6603.65	9569.92	12090.6	8862.19	9673.68	9978.13	1910.5
ACTL6A	267.038	444.426	281.188	274.373	382.658	474.947	235.993	326.524	296.525	306.793	289.355	334.677	347.358	275.517	292.124	290.531	226.033	299.41	374.055	297.228	356.917	419.403	265.918	351.695	308.553	326.118	349.832	306.281	206.389	286.617	361.555	311.062	226.25	284.334	315.151	256.295	234.774	294.564	200.697	204.297	239.223	344.418	361.555	260.905	276.982	380.387	232.691	224.221	136.397
ACTN1	3383.17	3045.35	2669.88	2096.99	2344.05	2508.7	2158.67	2303.94	2504.75	2789.73	2307.17	1693.47	2588.38	2417.96	3188.66	3957.19	3949.22	2757.66	3491.84	2708.65	2310.51	2407.68	2789.73	2988.57	2350.63	2597.38	2824.42	3308.07	2593.06	2379.75	2252.66	2470.68	2744.42	3390.02	3390.02	3233.92	1794.2	2556.72	2066.65	3615.18	2794.43	1284.84	2358.47	991.779	1858.39	2639.73	1448.8	1531.43	3629.59
ACTN4	709.189	784.2	206.602	617.322	411.491	776.815	614.251	731.959	769.93	718.111	683.06	667.956	503.012	429.235	686.399	1193.83	1036.8	971.439	1038.72	721.931	853.689	752.974	250.995	988.977	637.626	493.142	1184.3	748.549	842.084	565.801	399.93	778.461	650.76	983.843	709.189	415.93	902.089	557.682	744.863	611.22	674.375	704.143	965.892	631.082	786.723	1190.01	946.282	959.847	741.584
ACTR10	384.141	504.587	443.211	415.723	618.554	490.317	310.46	400.089	529.033	480.541	503.5	428.601	447.365	297.664	505.983	588.639	495.447	475.151	513.051	443.211	461.063	444.426	502.563	467.534	415.538	311.868	507.466	396.575	381.697	350.087	312.34	482.869	408.782	589.187	477.224	544.539	744.863	487.322	360.331	446.941	413.296	381.51	404.74	339.691	345.485	429.659	297.926	323.756	521.385
ACTR1A	673.168	779.874	1509.27	637.626	667.956	437.623	758.928	548.2	451.236	493.59	658.113	690.86	599.474	711.464	735.316	666.975	923.09	495.928	497.796	646.908	512.73	450.589	1512.17	503.226	610.197	765.287	727.637	537.559	529.033	1048.2	810.519	581.602	522.159	517.964	585.502	1203.61	632.779	527.707	859.266	1013.55	577.94	721.519	886.913	733.249	708.29	855.427	740.028	824.595	746.245
ACTR1B	254.922	324.139	181.459	296.856	291.639	293.122	321.518	315.151	279.636	255.397	201.12	344.418	269.532	299.41	228.897	285.273	224.135	236.543	428.601	231.576	330.995	288.181	130.422	368.084	295.02	314.339	263.645	311.977	230.027	294.155	262.325	312.736	242.603	293.346	256.786	213.09	210.977	227.54	276.586	208.077	222.966	348.437	314.339	429.235	328.324	249.858	349.345	360.331	185.35
ACTR2	5002.84	3479.76	8055.38	4462.03	5272.22	6168.61	3452.13	4924.69	6857.43	7297.95	5617.44	4209.93	5408.21	4243.66	5056.65	4264.25	3666.03	7050.63	4376.25	5166.68	7353.1	7498.55	8023.43	4223.35	4233.01	2734.75	3621.68	4691.46	4623.67	3504.16	3816.49	4540.96	4321.04	3864.03	5196.71	5103.71	3479.76	5491.15	3941.41	3638.7	4657.01	4397.42	2993.66	4472.42	4484.88	3013.66	4670.52	4871.11	4717.03
ACTR3	491.513	565.801	1086.51	563.424	488.707	2012.06	416.677	1436.98	670.881	505.256	448.797	157.581	413.296	676.379	582.234	1387.66	694.774	536.267	1435.89	490.087	594.051	510.015	1264.97	1242.16	370.732	471.501	517.198	2173.14	1784.1	365.337	792.128	405.643	1507.5	419.237	456.339	502.808	207.298	518.24	152.666	656.216	454.163	108.985	516.721	86.6128	127.521	588.639	137.971	145.652	549.215
ACTR6	309.055	258.697	501.594	327.147	327.009	371.542	244.826	412.569	324.004	359.135	327.273	195.877	331.568	257.404	282.936	324.666	160.336	278.677	399.598	309.055	236.395	311.062	477.426	449.953	297.792	214.748	224.135	329.256	280.852	210.631	316.816	385.104	338.397	285.167	303.856	262.837	304.825	287.233	94.4984	172.946	328.059	228.031	221.135	220.845	181.894	222.899	167.23	181.694	227.374
ACVR1	369.479	392.591	322.914	314.213	343.366	298.042	219.386	295.257	317.684	320.305	379.526	198.559	344.418	247.491	329.92	371.408	220.464	226.574	399.93	295.949	265.06	210.977	273.638	241.179	330.699	266.591	250.914	294.47	322.137	264.965	318.572	342.384	408.959	288.819	304.825	189.286	307.843	323.385	162.754	242.201	301.698	210.047	209.457	158.405	271.022	314.339	148.287	158.091	250.258
ADA	233.524	466.238	170.691	310.081	349.832	550.411	334.946	306.658	312.48	322.914	281.976	624.013	318.057	368.588	186.594	304.312	185.35	255.585	401.117	262.674	290.847	320.452	106.418	396.895	503.012	370.247	420.719	271.916	246.614	424.928	565.534	414.029	254.409	376.198	336.285	264.681	506.748	297.926	361.379	176.133	368.084	546.236	588.931	702.862	707.351	430.639	474.947	520.824	155.389
ADAM10	161.283	105.024	434.079	173.79	215.627	266.937	185.726	183.778	166.31	188.454	241.274	178.158	259.511	217.482	304.936	116.38	223.119	164.6	108.866	196.794	143.302	200.764	493.795	110.904	128.404	215.185	137.182	135.236	257.404	156.248	149.04	109.209	242.869	184.53	185.536	298.599	150.788	135.055	175.531	269.924	154.817	167.23	157.904	89.4511	178.699	160.068	173.056	159.376	181.22
ADAM15	382.896	270.135	502.441	311.235	313.908	235.812	740.975	316.057	271.949	253.285	330.51	494.609	413.598	521.984	272.619	247.714	292.65	270.448	339.955	322.778	296.841	274.849	427.401	312.576	388.136	496.143	273.303	399.788	339.053	289.785	395.986	310.747	284.764	363.337	376.711	270.835	267.003	331.567	536.577	340.722	346.942	430.611	299.238	527.507	530.23	364.649	464.919	421.258	269.011
ADAM18	107.224	103.092	142.739	152.666	106.006	140.124	165.005	114.55	146.176	109.425	134.59	168.487	161.831	76.6082	140.902	126.337	211.19	132.081	136.923	161.493	141.502	81.0263	199.593	95.9859	131.34	110.466	135.816	111.003	153.537	132.328	79.2391	131.769	174.632	150.885	139.226	161.181	251.083	125.855	202.667	129.014	196.665	160.611	82.8774	218.796	172.894	104.009	209.52	137.799	162.137
ADAM19	502.508	317.862	224.76	315.736	317.395	382.913	353.013	611.431	499.465	535.782	157.305	503.151	347.825	407.592	429.367	979.7	891.375	700.962	450.963	685.258	465.612	466.503	254.386	651.595	384.766	345.826	594.438	429.363	582.524	386.114	327.758	398.784	621.755	378.75	363.074	475.456	418.841	444.069	439.893	397.952	469.006	435.277	500.473	480.051	696.487	649.165	504.695	558.725	638.434
ADAM8	1697.26	1088.16	922.398	1153.05	1293.39	1181.15	1347.04	2042.46	1566.56	1654.65	1105.97	1722.97	965.892	1501.26	1145.14	2459.64	2071.64	1881.38	2307.17	1400.99	1531.43	1439.86	1243.41	1808.6	1299.72	1335.26	1097.49	1507.5	1582.66	1647.33	1126.6	1264.97	1885.74	1808.6	1269.74	1650.69	986.927	1341.93	3349.1	1618.26	1354.69	1559.39	1357.06	1680.24	1903.98	1332.55	2024.13	1833.94	1670.94
ADAR	2069.41	2138.56	1397.76	2137.01	2350.06	1243.32	1972.72	1713.1	2360.31	2029.32	3391.53	2469.06	1857.43	2317.33	1843.48	2216.24	2665.1	2232.5	1501.65	2508.99	1906.91	1640.8	1454.51	1466.06	2527.24	2563.78	2093.03	2165.68	2648.44	1655.63	2006.93	2092.82	1864.52	1488.56	2147.53	2383.79	2485.07	2120.1	2135.88	2338.06	1943.08	1777.64	2437.31	1613.19	1884.37	2190.79	1933.33	2022.57	3218.78
ADAT1	179.548	228.247	253.437	229.226	248.971	242.288	126.38	202.553	148.897	151.741	268.136	249.34	213.282	226.331	172.065	203.279	131.089	219.166	191.894	200.563	215.858	234.862	207.93	176.792	165.789	166.103	148.946	226.664	243.619	233.178	230.595	153.199	210.335	231.663	243.462	273.24	191.395	192.02	255.015	166.58	156.387	271.738	200.764	287.451	246.614	193.247	321.366	280.968	190.594
ADCK2	373.106	214.242	99.4874	338.397	411.825	224.467	283.384	253.255	270.816	269.02	359.616	329.527	422.408	268.329	278.561	210.554	189.829	283.694	249.151	349.345	341.971	361.203	97.7702	264.772	422.408	329.12	292.451	265.829	261.223	303.727	340.132	343.519	263.645	348.189	225.171	190.649	268.529	410.241	285.697	128.65	309.837	386.358	328.996	562.314	393.437	285.375	424.52	341.134	214.394
ADCY3	476.016	341.682	430.639	325.322	329.12	288.394	258.697	355.927	379.81	419.973	287.812	232.14	414.793	211.404	328.598	303.13	258.325	271.738	322.137	403.277	279.901	357.236	410.03	266.29	371.719	316.577	247.75	424.52	249.52	360.064	405.808	445.592	280.968	349.028	431.585	212.753	403.477	296.754	201.327	360.064	289.821	284.525	362.82	383.848	296.973	285.928	180.207	209.394	349.832
ADCY4	210.264	184.644	242.109	99.9791	168.063	50.1493	201.852	137.097	121.681	111.251	190.018	175.042	126.838	272.827	132.707	205.35	367.93	118.773	125.203	186.236	89.9164	90.4672	296.411	159.083	165.005	206.312	169.234	184.201	208.077	293.122	203.825	157.239	133.711	127.606	172.065	288.181	138.801	171.441	233.445	383.989	166.415	144.3	135.727	89.6823	175.859	253.623	153.101	149.978	335.368
ADCY7	227	240.476	335.78	288.608	194.462	160.133	370.247	370.576	308.661	272.238	324.929	278.561	223.341	448.974	238.109	171.589	199.324	282.525	128.123	286.402	346.368	288.819	322.017	148.052	245.145	275.293	217.957	400.96	504.014	280.451	362.82	211.404	326.644	171.29	195.453	251.166	214.973	270.914	334.677	323.889	173.166	190.715	220.845	348.437	263.726	166.476	324.561	324.929	254.584
ADD1	3824.37	6418.44	6084.23	5408.21	6804.95	3880.5	3571.61	4331.3	4450.6	4563.52	3890.51	3762.35	5227.23	3532.82	4623.67	3792.89	3941.41	5029.02	4223.35	5118.26	5086.02	5408.21	7877.18	4767.02	4703.56	3615.18	4691.46	4740.64	3335.75	4717.03	4484.88	5393.56	3949.22	6459.9	5453.95	5408.21	8254.72	4365	2937.38	5425.13	4509.62	2784.93	5056.65	3786.27	2947.01	4439.49	3308.07	3240.58	5149.73
ADD3	573.246	711.029	1114.42	597.833	776.745	1358.24	568.297	1054.66	917.275	719.796	415.146	264.726	641.075	649.069	651.794	787.838	548.845	797.403	952.636	723.491	644.491	584.8	1260.62	1093.04	451.692	709.981	637.272	1107.08	1023.62	456.142	830.526	544.025	941.647	531.85	634.205	663.815	397.241	554.017	199.275	748.698	650.94	281.434	543.008	242.078	284.273	622.821	255.997	269.758	468.547
ADFP	434.288	481.279	342.966	445.427	537.088	441.952	437.033	807.392	679.098	702.049	457.811	500.146	436.666	401.652	506.486	475.804	345.329	480.741	620.021	304.697	484.109	543.562	211.478	528.78	556.776	352.927	503.226	310.95	245.069	404.948	595.637	507.466	627.94	459.346	467.086	290.847	481.96	652.834	467.086	247.046	444.803	807.392	322.52	616.29	775.322	420.16	515.124	434.288	421.462
ADHFE1	197.505	457.043	183.023	229.675	261.313	162.912	177.016	225.957	284.633	258.609	109.972	195.696	269.438	221.805	182.733	204.498	212.231	173.717	235.803	131.893	229.144	230.816	104.074	255.212	203.697	225.253	208.077	215.256	146.666	166.957	211.546	311.771	182.975	110.466	220.224	158.571	169.4	273.853	155.432	140.861	146.479	238.859	307.619	250.631	232.14	283.488	182.442	211.047	150.305
ADI1	1046.6	822.915	1703.6	1212.4	1125.74	1024.36	909.99	1322.43	1068.03	1141.39	692.42	790.597	1195.8	868.347	1138.5	945.568	739.016	647.736	786.723	1076.83	995.069	1015.6	1088.92	983.843	917.862	862.792	874.362	730.598	521.133	1234.14	832.111	747.212	919.201	725.643	1068.03	912.207	820.166	1175.73	518.529	815.948	1227.8	622.325	801.376	964.302	1062.01	978.081	710.48	744.443	828.328
ADIPOR1	5546.4	12761.5	9464.96	11340.4	17528.3	4120.54	12985.2	7843.77	12985.2	12761.5	8734.98	11474.5	8506.43	5041.33	10122.3	5672.37	5771.97	17052.1	6665.06	10283.8	9777.65	9673.68	12595.2	9928.79	10283.8	6760.51	9417.09	8393.89	8155.34	9872.88	4243.66	8429.52	10077.1	10850.2	10915.9	9313.02	22172.2	8989.69	9777.65	11149.4	11669.6	8473.48	8055.38	11034.9	4989.72	6151.17	8360.47	8698.6	10499.2
ADIPOR2	725.301	902.089	1672.87	713.906	787.24	633.147	931.764	935.199	755.927	681.347	685.538	739.525	794.086	1105.15	751.739	747.212	777.268	663.437	859.796	751.302	802.866	680.136	1230.82	844.886	722.752	916.588	808.942	849.202	805.893	1024.36	1050.65	702.862	852.499	647.346	609.881	915.25	650.76	762.059	742.114	957.86	686.834	730.598	868.347	660.67	768.107	861.683	874.854	750.437	725.301
ADM	5599.49	2137.27	2730.64	2972.96	2968.1	2407.68	3013.66	2029.31	4198.77	4846.55	5753.56	3747.39	3029.89	3139.78	3029.89	3908.69	7050.63	3219.32	3443.74	3403.34	1969.24	2001.01	7163.16	3146.16	4439.49	4044.3	2878.79	2771.17	2704.03	3681.08	2810.08	2873.5	3966.94	4439.49	2744.42	4439.49	2104.67	4264.25	8124.29	6737.8	3917.18	3423.31	1007.92	1661.85	4188.97	2597.38	2224.07	2224.07	5672.37
ADORA2A	273.036	183.534	126.804	166.476	126.653	140.216	139.99	145.753	238.195	221.135	99.1237	146.431	224.135	135.924	142.421	190.782	191.156	247.75	166.911	240.647	168.814	166.362	91.197	226.808	205.35	164.534	296.754	153.443	166.58	208.723	175.909	246.777	185.916	214.464	217.789	118.939	167.23	194.989	222.059	180.357	167.528	180.541	231.663	111.464	196.593	271.825	136.559	149.509	113.66
ADORA3	61.8364	71.0896	128.614	70.7215	145.779	124.515	135.634	359.299	135.971	169.181	28.2977	82.0191	76.8548	140.682	59.3537	136.413	54.4222	65.46	87.7097	92.7588	115.984	117.09	79.5171	95.9819	89.5751	100.684	129.182	37.9204	67.9159	83.4502	145.429	64.0841	164.204	54.1743	119.421	41.847	46.3051	50.184	75.3923	84.0741	56.3277	49.9527	71.3216	147.605	81.0337	129.525	103.942	99.901	180.341
ADPGK	424.928	450.589	716.854	420.353	508.723	396.575	554.645	415.151	498.252	452.262	607.168	506.246	465.572	652.45	453.316	587.005	497.32	500.146	456.339	503.5	521.615	444.803	536.562	482.869	484.109	447.574	369.807	486.604	502.07	633.517	511.944	433.906	437.224	501.806	420.719	738.504	393.793	509.554	576.407	506.486	466.883	620.021	523.751	624.323	468.877	480.053	637.626	613.871	541.533
ADPRHL2	341.534	381.193	225.253	316.211	368.887	212.875	414.428	380.093	349.832	391.317	381.365	424.928	346.952	496.86	291.084	521.615	379.947	344.294	300.786	316.577	331.815	354.739	154.027	321.366	405.643	422.408	411.115	228.5	297.792	289.94	334.551	345.902	273.638	316.067	314.876	305.933	377.223	400.256	426.075	263.923	312.225	408.603	461.827	411.651	422.988	420.353	394.422	438.826	514.111
ADRB2	651.052	797.655	434.877	659.943	769.93	463.432	503.763	729.71	582.885	617.019	504.798	748.549	711.879	588.931	588.311	437.224	223.579	561.385	466.664	729.282	770.44	855.427	722.308	769.025	651.737	521.385	530.475	492.679	831.102	624.013	576.407	822.327	523.515	378.712	611.548	558.62	645.765	799.116	383.003	677.917	583.237	466.016	816.474	601.028	533.204	610.197	606.891	601.326	430.856
ADRM1	638.707	1333.86	253.164	654.045	603.769	1084.74	684.72	535.697	649.311	624.323	713.906	636.572	639.831	539.835	563.726	885.155	908.778	687.254	860.392	658.827	764.775	719.247	294.564	805.324	666.975	677.146	1116.77	611.22	660.357	493.59	526.551	789.217	488.707	1001.33	702.049	379.81	993.676	694.028	819.173	641.967	698.143	669.044	1114.81	673.168	693.296	1135.75	817.973	680.602	690.194
ADSL	809.956	792.128	1050.03	877.827	945.568	716.427	1105.97	756.405	708.775	691.212	788.222	973.965	880.833	991.074	824.595	610.887	659.943	564.913	742.114	779.874	763.822	783.761	905.203	691.212	909.99	1258.88	824.077	683.936	544.539	1335.26	1520.45	784.2	608.799	718.111	764.314	877.827	617.588	971.439	695.605	657.337	704.957	1039.44	834.318	1153.99	1253.41	851.332	880.364	896.453	485.935
AES	468.711	605.791	171.049	461.541	419.674	854.601	393.606	647.617	564.481	580.197	319.217	555.339	423.673	323.524	376.186	397.374	300.555	547.507	866.754	464.787	788.813	722.895	161.981	646.259	365.118	427.799	596.653	480.838	303.326	466.85	626.779	476.522	435.949	837.334	496.004	237.024	493.73	426.457	525.87	265.655	368.145	480.852	744.15	731.631	551.404	539.116	529.563	554.854	272.858
AFF4	314.458	117.425	359.135	229.868	208.143	220.146	199.521	281.52	278.677	255.494	266.195	253.349	251.26	222.132	293.45	154.975	244.163	223.195	269.924	306.523	298.368	286.515	388.14	219.1	252.389	168.226	152.288	207.228	246.856	171.126	217.482	274.286	271.916	190.485	230.512	286.84	175.467	259.232	157.192	205.914	264.965	245.919	156.387	210.758	189.461	191.773	211.805	214.525	402.747
AFTPH	98.8599	86.207	209.305	104.128	85.5522	175.356	95.9225	155.029	74.5645	66.9759	89.1231	54.4268	76.5031	136.375	96.5687	155.048	94.8992	108.27	181.03	84.2516	56.0791	79.4365	230.162	149.892	87.4935	103.95	75.5564	202.838	232.138	75.0134	126.037	92.1283	195.433	107.74	114.375	135.248	69.4913	92.1755	41.5649	150.28	96.349	54.8894	67.961	30.4428	33.9299	82.5051	31.253	38.9863	125.397
AGK	145.512	203.497	87.6175	137.935	181.22	210.47	113.223	135.236	159.584	153.062	163.006	184.772	149.633	142.608	127.274	137.562	62.6703	136.694	173.966	147.865	186.236	185.403	71.5975	190.649	173.909	150.699	164.961	152.421	77.5944	165.005	223.906	156.904	109.872	145.902	173.109	113.363	138.592	188.241	85.1839	102.235	150.031	140.262	199.118	184.277	180.254	172.671	135.727	146.528	83.9112
AGPAT2	85.8768	100.142	53.9863	88.8887	97.5681	78.778	138.119	90.9761	101.609	97.6866	119.709	122.501	86.3921	81.27	123.631	80.484	227.933	117.531	74.9062	111.882	117.609	114.933	48.2951	57.2509	83.1759	83.8545	93.9015	120.242	153.8	106.123	62.127	77.5596	103.76	169.549	89.6913	93.5729	97.9737	81.2631	243.762	161.833	95.2451	117.909	96.1313	89.2398	140.976	147.226	141.422	134.134	118.617
AGPAT3	93.3593	163.961	130.244	174.25	150.15	118.055	167.241	140.34	155.321	142.89	203.228	156.768	145.412	134.331	138.564	72.8472	151.233	147.721	89.6756	145.746	167.808	175.422	145.408	79.4478	145.957	106.609	136.36	142.855	191.545	199.764	115.331	102.826	154.046	186.201	124.983	146.753	339.028	135.713	269.873	126.471	137.704	130.341	141.529	210.548	191.779	122.265	159.206	167.873	165.46
AGPAT5	98.6241	147.777	204.705	122.789	125.117	328.324	144.788	290.531	155.347	175.531	110.645	73.6417	134.679	167.849	92.7871	144.833	81.2247	153.973	199.96	126.91	85.731	158.979	147.777	190.348	109.353	163.539	159.133	225.338	183.023	135.632	191.211	109.503	239.916	116.601	105.877	114.44	53.0404	120.966	17.4838	92.6177	97.4355	54.4249	137.799	52.2249	42.6904	159.269	37.7605	44.7996	56.9077
AGTPBP1	1339.56	985.426	1579.07	1293.39	1390.39	1020.39	737.664	1179.06	1056.22	1131.24	1009.6	1082.88	1252.3	772.931	1415.16	1745.17	1594.73	1204.66	1286.11	1435.89	1120.56	1192.95	2500.24	1271.17	1075.99	658.113	756.405	1587.72	1176.8	977.368	803.362	959.131	1232.97	1224.71	1355.92	1635.88	1073.71	1335.26	1396.88	1457.62	1464.99	905.761	849.202	701.582	823.52	887.483	881.378	946.917	1747.09
AGTRAP	379.359	313.721	107.224	195.566	186.719	319.372	376.708	251.166	347.358	290.531	365.815	243.55	252.389	302.178	300.558	568.206	635.162	257.201	485.618	237.265	260.434	212.675	135.365	336.285	357.961	257.04	350.815	304.697	328.468	238.947	192.139	296.754	318.681	572.401	275.406	194.871	254.831	288.608	642.736	400.256	287.451	373.106	307.14	271.641	419.584	337.593	397.753	371.863	401.652
AGXT2L2	139.88	64.64	96.689	135.004	97.6384	155.465	166.398	134.937	103.691	105.097	129.171	165.517	117.325	137.148	112.648	159.856	92.8913	125.371	112.961	98.697	116.534	110.6	60.8867	144.199	149.654	233.175	96.0626	123.064	138.978	144.445	107.616	98.2676	118	157.692	108.708	112.774	142.386	133.001	332.497	131.672	115.588	193.357	105.11	175.352	196.639	66.4029	134.359	151.395	143.343
AHCTF1	353.513	201.823	353.619	258.616	207.898	214.925	255.894	218.972	272.944	285.579	143.037	326.48	284.497	205.965	282.693	374.976	282.63	306.006	230.937	242.472	314.94	312.51	514.586	275.355	205.29	210.851	207.466	207.234	318.821	228.028	225.439	244.503	279.519	248.797	268.742	481.421	211.242	294.297	279.881	374.348	260.02	227.599	197.378	174.796	252.599	229.755	294.638	286.972	340.648
AHCY	158.091	281.3	161.639	151.131	217.879	519.273	163.805	221.661	150.49	185.35	237.926	272.641	234.395	194.871	174.868	296.973	196.405	178.502	284.334	180.477	241.008	234.543	119.547	258.21	208.234	134.59	248.881	263.527	216.555	188.697	241.757	212.675	161.39	324.139	149.088	123.794	194.726	220.539	250.995	116.199	220.758	251.166	201.398	206.669	229.371	216.482	213.433	228.326	130.466
AHCYL1	653.681	886.382	828.904	978.755	814.366	896.453	807.799	1072.79	1061.3	996.582	881.852	850.816	807.799	873.045	923.09	902.583	744.863	1221.4	1062.84	835.411	1021.24	1114.81	766.792	1048.2	813.251	611.22	754.437	1044.99	1023.67	698.143	671.949	698.954	931.109	857.079	687.678	764.314	638.336	776.815	786.247	566.147	766.346	932.434	931.764	779.319	726.537	792.597	984.727	839.772	768.556
AHNAK	1325.44	1416.2	1528.04	1658.12	1045.93	2689.45	1973.42	1982.84	1155.28	1402.93	1153.71	2224.05	1809.92	2265.9	1732.78	1236.64	1516.43	1436.93	2645.03	1632.99	1790.03	2020.37	1439.54	2186.44	1260.9	1686.59	1772.46	1536.1	1207.88	1949.26	2768.71	1435.22	1501.27	1290.69	1242.13	939.159	1474.49	1061.9	2069.4	864.104	1248.75	2807.26	2279.32	3051.74	2017.42	1844.71	2241.11	2319.51	717.55
AHR	2910.97	2983.86	4140.52	3369.15	2747.71	3181.85	3563.34	4767.02	3587.28	3188.66	2320.07	3652.13	3212.91	5633.36	3219.32	2839.32	3403.34	4531.02	2993.66	3732.41	3396.65	2963.13	4820.9	2819.79	3128.23	4728.31	4033.76	5929.77	6231.41	5131.64	5166.68	2239.83	5103.71	1727.04	2894.19	3984.36	1525.38	2983.86	2712.73	4054.9	3195.35	3739.68	5856.24	5546.4	3423.31	4846.55	4780.86	5302.1	3472.43
AHSA1	390.601	166.476	150.388	357.403	292.667	403.986	309.837	260.261	191.211	186.426	349.832	393.793	245.396	275.293	309.315	330.837	302.053	195.128	315.527	333.151	278.065	286.034	284.734	386.721	366.677	400.796	343.076	289.03	251.622	353.083	345.153	408.43	229.59	360.486	323.527	324.139	139.122	406.343	171.824	245.396	370.097	483.865	414.619	392.402	476.016	311.547	389.204	402.376	370.387
AHSA2	204.918	818.517	398.972	329.771	385.55	545.366	369.043	263.726	407.225	437.41	181.459	195.19	289.703	290.173	449.953	554.106	296.059	257.667	409.663	292.221	320.065	475.804	336.285	605.708	235.993	431.408	569.715	582.885	338.841	177.36	459.346	344.55	351.695	274.565	263.425	301.958	277.089	209.249	267.712	270.716	276.242	198.22	441.751	182.256	226.502	458.483	136.738	121.901	444.622
AIF1	3485.37	1851.03	3424.23	2780.72	1873.31	2388.08	3625.47	2660.69	3264.86	3150.44	4422.18	3500.37	2914.94	3254.55	2882.75	2420.38	3675.55	2705.49	3479.85	3008.53	3392.82	3221.49	3871.52	3219.45	3203.35	3130.23	3188.84	2216.43	3792.06	2588.42	1639.41	2665.04	2114.21	3049.42	2959.07	2183.54	1725.82	2990.58	3668.79	3376.56	2845.63	4026.16	3038.54	3133.06	3028.82	2873.9	3750.21	3647.36	2780.44
AIM2	600.439	132.75	411.312	243.706	437.808	586.673	362.82	240.917	823.52	809.956	2411.47	278.481	468.457	429.021	191.583	639.831	1110.27	876.528	273.638	323.756	276.789	283.918	752.054	519.853	563.117	581.602	275.077	360.763	455.906	470.094	313.359	424.354	412.208	313.483	337.851	655.168	577.283	573.418	667.302	584.534	552.122	511.125	125.36	206.748	525.481	498.686	189.903	176.428	1023.67
AIP	585.167	522.159	297.792	656.93	504.798	609.235	621.031	598.313	562.314	533.477	497.32	695.605	532.331	673.935	528.49	398.797	509.002	633.147	576.735	569.165	758.928	710.029	261.223	513.265	542.632	686.834	549.836	529.91	616.29	593.372	732.817	516.943	604.417	710.48	524.6	379.359	560.811	517.198	769.025	446.712	515.674	834.318	674.766	767.183	861.683	537.335	641.967	674.766	354.097
AK1	203.697	315.151	113.467	254.584	195.877	94.9764	277.089	134.334	174.583	197.133	118.309	193.779	189.414	172.281	175.352	108.249	117.425	122.365	96.5255	147.344	85.7871	111.397	91.2744	167.907	201.12	229.435	244.439	189.639	49.1067	225.338	141.179	248.447	157.946	145.106	170.151	180.646	431.777	218.796	137.144	397.753	181.398	191.031	251.812	192.867	177.424	224.298	130.288	144.962	196.593
AK3	431.777	495.211	514.371	512.191	413.648	380.716	396.575	441.328	305.302	327.932	293.554	390.387	471.297	334.386	436.204	321.62	197.571	296.634	344.711	405.088	285.375	310.081	450.818	400.592	396.895	437.808	372.14	474.45	203.955	382.161	462.973	491.285	276.022	394.61	406.883	356.182	455.906	350.815	321.366	252.389	346.533	420.16	331.429	466.238	334.806	387.229	342.7	359.286	306.658
AKAP10	188.562	102.204	206.82	169.738	204.844	84.229	138.245	171.638	203.199	213.09	158.668	203.279	202.667	178.27	154.817	98.8614	217.957	206.174	56.6619	199.735	247.415	237.354	253.087	60.8172	144.746	132.416	98.5642	98.2742	221.588	161.683	187.938	109.129	155.542	109.632	160.86	250.345	128.936	167.23	238.109	231.815	168.7	191.092	125.034	191.654	200.921	110.841	230.674	231.408	260.176
AKAP13	195.623	172.531	198.401	233.716	225.967	141.308	169.941	251.281	304.414	298.815	372.564	227.324	214.303	303.042	165.443	198.523	214.581	599.61	151.597	268.285	318.869	301.858	190.903	187.032	212.991	148.863	160.935	254.619	334.979	214.934	177.319	164.582	235.676	207.425	214.518	300.842	245.2	230.273	329.04	222.13	228.246	219.994	211.156	247.63	210.338	193.096	310.596	281.573	420.327
AKAP7	107.052	246.772	117.303	138.267	122.19	163.674	191.002	170.589	263.851	226.383	125.077	93.8778	131.644	165.555	95.9975	92.006	69.8169	315.259	239.226	198.815	186.508	201.902	117.821	202.722	128.682	139.506	132.781	161.496	230.086	112.473	154.217	105.644	126.512	72.7865	116.284	133.735	79.0855	129.544	38.1118	143.639	169.65	93.8543	124.562	85.2593	57.9281	108.999	84.4018	86.0831	108.591
AKNA	2372.72	2047.52	1554.08	1494.62	1547.96	2212.25	1864.93	2009.27	1947.19	2055.45	1674.62	2436.86	1754.3	1959.52	1733.14	2609.91	2290.03	2535.75	3083.79	2142.91	2606.12	2602.14	1639.74	2916.79	1815.74	1951.85	2215.63	1546.17	2140.69	2303.94	1995.83	2436.86	1802.48	2208.87	2336.58	1741.11	2307.17	2039.64	2447.84	1979.77	2280.13	2627.03	2490.14	2463.14	2310.51	2212.25	2673.75	2496.64	2459.64
AKR1A1	255.842	366.19	201.495	270.275	317.484	479.713	407.41	319.789	258.249	259.011	487.273	416.515	276.243	381.197	281.585	210.815	321.328	223.563	247.445	236.741	281.186	277.011	124.66	259.741	319.232	343.536	374.527	256.371	349.968	358.28	378.314	304.624	261.256	267.681	262.037	176.239	204.144	309.461	430.431	216.284	287.676	415.331	388.8	458.956	408.496	384.549	369.556	360.992	220.749
AKR1B1	551.499	601.603	362.192	486.352	537.846	837.548	537.335	552.122	690.86	634.479	368.084	704.512	562.82	588.002	427.658	380.093	339.25	499.418	619.687	475.804	688.115	673.935	319.903	598.924	509.554	679.703	544.539	414.619	348.189	550.411	765.867	575.233	511.633	573.072	458.253	336.285	498.052	562.82	519.048	394.953	548.539	842.084	655.49	877.183	705.308	498.435	788.222	733.643	386.232
AKR1C3	231.815	236.24	231.898	318.968	699.886	281.976	377.044	330.441	205.123	194.66	445.018	655.168	168.632	289.03	278.991	319.372	158.823	93.2131	516.943	305.064	403.277	452.671	128.819	574.67	374.226	401.464	342.966	475.391	89.6823	345.902	289.467	298.699	330.199	108.216	405.643	393.793	398.08	606.891	148.709	238.268	598.924	357.802	629.659	629.313	552.122	252.59	829.498	776.815	196.405
AKR7A2	1105.97	951.659	1462.27	954.995	1007.12	430.856	981.785	1018.13	762.059	805.893	728.519	854.794	993.676	1080.2	1130.29	591.241	665.861	538.965	852.499	756.405	901.463	949.044	883.926	742.114	946.917	934.479	820.648	756.925	611.22	1099.02	1248.14	981.785	952.99	851.894	816.474	662.344	747.612	1350.99	796.595	440.25	996.582	833.168	963.62	1018.94	1011.31	879.803	949.629	996.582	607.491
AKT1S1	131.046	147.651	78.3197	139.358	84.6798	54.1046	214.007	98.3007	93.1236	95.2491	84.5986	140.414	112.617	97.8296	93.0448	84.7317	122.015	93.692	103.727	127.071	80.918	65.2725	127.863	102.038	156.847	140.039	134.8	92.7871	71.0307	114.028	56.1489	125.698	99.7622	122.485	145.153	133.457	215.256	143.166	120.752	252.097	176.792	78.616	104.705	109.8	100.484	106.827	166.957	122.442	196.992
AKTIP	145.939	122.821	220.608	103.857	95.2491	175.232	131.56	170.589	117.317	103.631	109.241	58.9453	115.575	182.387	108.112	247.491	157	83.571	182.323	147.44	96.218	86.3898	269.643	173.966	84.7076	113.537	99.0516	185.273	201.327	101.938	147.651	110.582	215.034	92.5519	93.5016	130.507	78.3693	121.681	51.893	175.406	127.452	69.5246	80.398	31.4249	62.6703	92.3746	63.1675	55.0029	135.77
ALAS2	244.528	2798.61	676.787	2602.14	1564.71	250.345	2500.24	677.917	2552.65	2425.22	288.72	2576.22	925.749	557.387	1451.42	281.976	604.417	1974.15	457.811	793.455	352.927	290.062	396.235	456.339	2024.13	723.549	519.853	1729.2	683.06	1432.13	639.131	984.727	2721.51	883.926	978.755	1551.03	4780.86	588.639	2114.21	1197.68	841.535	728.139	671.614	1383.46	736.729	262.674	1513.87	1529.99	547.641
ALCAM	171.02	258.429	146.666	150.163	152.467	210.554	108.009	194.989	104.741	111.609	104.437	94.7974	131.808	102.686	113.07	194.726	157.239	115.506	195.392	158.622	115.541	106.283	204.224	175.531	153.007	121.72	193.779	179.775	157.093	67.0162	101.575	146.528	126.764	153.101	144.118	251.722	82.7456	127.689	77.4262	79.0944	189.099	71.9217	104.275	55.0713	50.0573	136.479	50.1493	67.3188	162.484
ALDH16A1	460.009	556.215	138.407	456.832	577.599	558.331	332.871	442.145	352.03	330.699	400.592	387.988	485.344	260.08	371.863	354.258	298.368	278.782	355.927	453.114	398.23	379.038	118.186	277.303	511.633	312.614	585.502	336.591	339.691	440.438	409.135	456.832	372.486	396.235	495.447	259.787	397.922	339.982	344.124	263.337	414.619	339.691	505.733	425.626	434.497	505.256	402.747	412.002	282.623
ALDH1A1	252.692	213.282	513.265	200.153	393.274	252.48	424.354	203.497	261.488	294.256	704.512	213.941	317.684	390.601	177.766	198.559	222.899	226.033	269.742	335.78	325.322	325.213	302.525	252.907	307.843	197.263	307.265	119.114	210.554	296.268	249.34	199.192	95.9263	135.509	324.254	157.351	112.649	355.664	139.358	225.171	302.525	351.558	285.477	202.667	135.852	334.946	347.108	340.132	168.814
ALDH2	444.044	356.583	528.231	402.02	557.057	361.555	620.728	375.181	372.14	301.315	576.161	393.437	432.227	486.352	633.147	408.959	631.857	248.624	496.123	326.394	337.331	347.87	505.983	299.521	352.764	370.905	357.529	411.825	478.18	424.716	374.542	272.641	287.154	452.901	336.428	390.601	178.213	271.916	612.235	466.883	322.272	361.555	321.62	462.973	303.727	393.618	446.508	427.864	434.707
ALDH3B1	152.368	315.581	73.7992	134.25	124.829	173.808	148.502	192.757	239.869	250.508	164.898	170.065	128.124	130.932	125.373	267.666	310.575	183.257	187.556	153.946	258.654	217.118	79.6179	159.457	203.199	102.624	268.811	128.998	226.818	145	87.3944	180.355	149.061	249.792	171.577	92.406	290.453	172.141	295.073	172.62	216.135	114.116	225.588	168.146	160.226	280.178	201.506	215.245	209.994
ALDH5A1	116.838	192.867	280.563	273.424	321.771	99.7953	185.132	176.965	227.54	229.59	117.915	247.145	239.415	76.1304	207.859	103.353	51.1741	310.315	113.034	248.971	136.64	154.579	427.864	340.818	219.998	79.9927	193.72	174.691	87.5149	115.249	128.566	264.288	171.54	137.935	178.27	224.467	1204.66	176.67	93.8667	239.505	208.723	113.5	125.743	77.7064	78.8856	55.8975	104.741	130.288	350.815
ALDH9A1	2644.16	1253.41	2576.22	2957.22	3013.66	2326.88	2404.15	2233.48	2376.2	2535.75	2088.18	2094.02	2963.13	2094.02	2362	2407.68	2165.04	2114.21	2242.91	2863.25	2878.79	2873.5	2699.22	2597.38	2819.79	2508.7	2074.88	1652.41	1842.77	2239.83	2463.14	2665.53	2236.86	2060.65	2926.47	2673.75	1564.71	2069.18	1286.11	2276.93	2803.71	2463.14	1272.32	2264.59	2006.73	2042.46	2504.75	2543.82	2094.02
ALDOA	1083.46	1084.15	673.921	1140.12	1307.24	1266.23	1501.92	1187.37	1104.37	1188.76	1063.07	1385.72	1160.95	1015.25	1454.07	1000.95	1805.7	1173.25	760.515	1124.89	1360.55	1430.8	665.632	683.345	896.886	1172.59	1096.35	995.69	1467.6	1250.82	898.922	919.606	1393.61	1949.99	1019.39	1148.89	1286.61	793.744	2612.11	1600.89	1090.22	1838.16	1033.29	1623.14	2206.38	1352.06	2001.35	1863.14	959.344
ALDOC	506.486	374.701	236.172	457.61	464.342	234.862	388.883	424.716	390.945	389.352	418.18	308.186	492.434	414.793	462.474	390.213	317.407	215.034	380.238	455.067	360.486	329.652	269.02	384.141	590.947	476.984	456.832	269.643	316.694	395.601	370.576	743.032	390.793	336.591	437.808	449.188	334.551	574.261	358.84	338.841	449.764	471.297	520.824	524.6	509.791	394.248	431.777	462.973	478.837
ALG13	323.527	202.608	271.641	336.285	297.664	321.62	314.876	257.04	332.244	311.547	385.262	238.268	368.887	248.447	363.312	187.315	306.172	236.172	189.956	306.281	239.754	291.531	204.422	224.774	347.87	265.25	264.772	198.824	307.14	205.054	234.326	371.994	315.671	343.366	242.109	201.973	334.806	340.818	179.915	233.863	306.658	302.648	171.398	247.145	317.546	238.268	255.125	255.494	267.311
ALG3	134.39	169.093	35.7388	110.829	120.897	119.292	133.881	98.5485	76.3325	71.8173	111.049	148.401	125.702	125.657	111.771	76.6082	134.184	70.7515	100.244	114.343	87.6606	76.8546	31.8092	104.616	154.033	155.72	170.488	96.6249	96.3775	132.539	179.097	147.264	80.6147	91.409	124.973	59.194	101.684	136.038	124.018	111.175	119.263	154.06	181.11	164.154	168.116	204.853	138.148	140.824	81.336
ALG5	114.305	154.673	243.035	98.3007	103.794	664.226	126.874	179.66	98.6241	112.368	101.972	60.2852	113.777	161.885	108.282	135.852	94.7349	99.67	235.993	98.5338	146.479	136.966	216.106	212.809	91.197	149.23	150.253	185.596	157.289	94.8595	250.822	142.12	153.875	138.073	99.8221	89.3011	101.158	97.6753	21.621	110.131	96.074	73.4165	135.509	59.6591	50.8399	181.275	52.5734	43.6107	66.9285
ALG6	165.789	183.474	213.941	169.234	230.444	246.7	97.9892	180.418	168.166	135.924	169.341	139.172	168.863	145.939	162.083	273.036	144.072	116.72	274.47	156.95	160.715	177.939	248.793	315.388	170.252	134.882	161.586	229.513	168.323	132.888	156.847	229.513	143.433	234.61	186.097	169.95	168.592	166.415	107.866	127.234	157.54	140.992	154.716	105.307	126.804	174.126	102.4	108.749	180.646
ALG8	135.924	221.51	182.554	171.486	167.113	284.633	154.184	157.093	149.04	149.882	187.185	135.236	156.788	180.839	150.031	133.629	142.282	133.237	150.439	156.248	192.088	183.534	150.988	156.536	175.531	178.636	233.357	170.642	116.601	214.595	278.286	186.771	114.511	131.089	145.608	133.711	135.28	160.665	92.3746	124.631	116.455	150.606	222.059	180.021	176.077	210.128	134.051	132.931	84.5986
ALKBH3	375.181	387.414	369.322	476.526	435.842	400.592	397.753	446.16	368.588	408.069	484.84	486.832	440.03	375.181	376.866	325.058	331.972	374.055	382.853	408.242	471.056	539.835	291.186	396.418	504.014	494.981	383.694	329.367	294.365	437.808	500.146	462.474	374.055	370.905	439.015	373.593	352.292	480.284	355.202	315.01	357.666	480.741	459.146	553.803	494.006	412.569	468.645	437.623	300.122
ALKBH5	1604.74	2576.22	1390.39	1981.85	1849.69	2467.46	2564.49	2931.84	2500.24	2354.13	1630.58	1451.42	2330.05	2347.41	1487.19	1774.01	2024.13	2104.67	2050.11	2500.24	2564.49	2519.68	1598.17	1993.34	1769.65	2404.15	2150.54	2673.75	2333.62	1951.85	3188.66	1713.4	2055.45	1933.93	1847.22	1676.43	1901.85	2296.57	1959.52	2224.07	1266.33	1892.77	2500.24	2372.72	1885.74	2047.52	2052.82	2293.22	1727.04
ALKBH6	179.485	199.888	61.1219	150.938	169.112	123.642	182.442	164.534	166.528	165.32	162.637	149.334	157.146	180.207	137.799	125.78	140.082	126.337	147.821	115.897	153.687	153.062	65.4829	154.817	197.636	241.59	168.592	151.635	127.73	180.021	185.596	195.566	120.664	137.888	144.072	105.912	148.664	195.949	135.555	171.701	141.955	236.623	208.578	196.211	217.482	190.275	156.248	177.189	150.163
ALKBH7	1158.98	530.198	687.254	1012.83	497.078	491.945	1053.09	795.559	636.922	596.661	624.323	694.028	951.659	854.209	946.282	577.283	724.828	417.386	670.146	902.583	621.031	537.088	721.931	540.968	952.99	1136.71	798.619	594.716	694.429	864.028	886.382	1075.27	726.537	925.749	852.499	486.604	616.679	907.452	688.503	663.787	806.881	703.679	862.217	923.729	778.461	763.354	767.183	838.635	618.959
ALOX12	266.105	170.052	117.948	190.782	140.671	121.23	75.7137	75.3089	244.528	282.936	145.796	50.3423	177.711	83.9355	175.042	206.883	92.2487	94.4407	326.394	78.543	218.552	200.101	117.841	121.112	155.389	63.748	198.559	96.9048	89.1068	95.5143	120.39	123.492	158.51	250.914	209.109	62.6307	353.384	164.6	124.238	126.174	143.345	69.2636	126.138	80.918	148.756	198.682	68.2061	68.5183	93.8091
ALOX15	26.5939	15.3727	55.9886	35.5224	67.1521	26.6869	43.5722	267.862	61.3219	61.8639	3.35659	48.7957	22.2505	47.7191	32.7413	30.7427	3.54604	37.3677	12.2088	25.6185	91.5991	102.381	7.16586	51.2469	56.7967	20.8444	31.99	15.5789	21.2052	25.1564	28.516	29.235	122.414	20.5198	38.8581	6.90822	6.822	31.8445	14.1011	5.26499	14.0784	15.1359	20.6723	40.8169	38.9875	21.637	34.315	28.5931	11.4149
ALOX5	5031.13	2482.63	3210.79	2813.71	3895.62	2125.17	3743	3463.74	2680.3	2815.04	2690.03	3804.79	3175.28	3700.68	3873.57	5168.9	5768.03	2482.12	2352.48	3364.24	2239.32	2142.61	4033.23	2865.75	3394.41	3833.67	3001.15	3662.68	4469.86	4032.69	3030.66	2824.48	3664.58	2290.95	4079.77	5245.27	2335.59	4053.85	6012.15	6555.06	3361.31	4476.3	2654.29	3295.66	4384.11	3147.33	4201.68	4126.27	4904.76
ALOX5AP	7750.32	7624.37	12090.6	6711.61	9513.95	9872.88	8734.98	12515	9673.68	11034.9	10499.2	11669.6	11034.9	14981.5	9673.68	21406.9	20309.3	11732.3	10915.9	13407.3	10499.2	11089.3	10975.4	14438.6	8055.38	8910.79	11215.1	13901.2	16517.4	12006.8	10850.2	12090.6	13141.1	9167.87	11945.7	18139.1	7567.94	11945.7	11669.6	15498.1	12515	12837.5	11340.4	8429.52	12295	12006.8	13407.3	12436.2	20136.5
ALPL	11669.6	4071.22	2310.51	5804.34	7050.63	2496.64	6061.36	2496.64	5787.76	6231.41	3629.59	6210.52	5491.15	1874.32	8698.6	10283.8	19283.1	6436.24	6365.82	7532.98	3128.23	2983.86	9928.79	5166.68	6103.57	8093.12	3188.66	6084.23	3808.5	11340.4	1703.6	4291.74	8055.38	8360.47	4623.67	15498.1	1979.77	5471.53	17655.8	20658.4	5672.37	7624.37	3526.79	5393.56	8093.12	4522.05	7599.56	7212.24	6459.9
ALPP	2221.28	2921.73	2290.03	2512.8	1899.42	2382.72	1554.08	3403.34	2775.29	2119.76	1571.15	1526.82	2205.47	3181.85	2193.74	2588.38	2968.1	5103.71	2474.64	2843.72	2762	2636.03	2528.26	2568.16	2140.69	2780.14	3158.25	6804.95	5804.34	2180.75	2333.62	1729.2	3322.24	1412.36	2055.45	1899.42	1539.9	2196.73	1623.46	2921.73	2492.98	1520.45	4509.62	2003.65	1275.4	4110.89	1860.5	1722.97	2937.38
ALS2	131.424	215.858	257.404	165.162	213.09	132.372	158.241	292.221	173.215	188.304	153.101	112.189	189.227	187.872	159.968	193.779	159.186	152.368	142.282	140.902	128.44	159.74	174.868	177.137	185.018	157.146	169.501	198.157	170.252	144.696	164.799	159.63	207.93	141.419	157.946	152.421	104.643	139.945	114.665	129.8	126.959	97.4982	172.118	110.032	100.232	222.966	70.9382	80.4244	166.791
ALS2CR13	587.005	833.168	1093.46	931.109	885.155	857.079	752.974	666.577	731.959	740.544	466.421	1056.22	1041.02	893.093	844.886	444.622	648.967	691.212	619.316	1068.03	707.865	759.899	622.659	883.926	775.322	1009.6	1260.28	601.326	892.442	648.593	889.336	802.866	738.1	828.904	777.838	714.261	435.656	617.019	451.435	460.608	754.95	736.729	813.776	910.552	480.741	1002.79	609.597	603.093	672.294
ALS2CR2	3984.36	11276.4	12295	12837.5	13901.2	3349.1	7990.94	7436.48	11732.3	12090.6	6760.51	13407.3	9258.7	3479.76	8324.22	4110.89	4198.77	12006.8	4355.16	9622.84	8155.34	8429.52	10666.7	9258.7	9928.79	3540.37	8547.66	8473.48	4385.86	8254.72	3880.5	8862.19	9207.77	8989.69	10386	11215.1	20461.3	8698.6	2873.5	9928.79	10915.9	7079.2	5687.19	8698.6	3146.16	4281.64	7050.63	6665.06	8910.79
AMD1	735.005	677.218	1062.84	682.08	675.555	818.907	728.236	720.952	704.74	741.779	718.798	635.61	747.481	844.6	821.401	1062.97	793.237	852.101	684.178	807.727	809.218	871.003	1120.79	639.618	559.445	789.456	715.66	697.452	958.995	489.833	563.726	571.499	814.945	613.016	762.751	1169.25	620.761	763.632	490.887	846.676	750.914	627.555	694.105	405.86	531.479	688.134	597.175	595.866	734.752
AMFR	176.219	177.679	227.835	248.988	91.4321	151.473	177.726	153.095	179.174	200.853	138.073	254.84	170.072	91.0676	178.474	127.265	117.062	356.648	106.067	161.349	231.767	215.355	188.966	154.421	128.376	91.386	212.892	283.002	253.755	168.084	83.3737	148.794	271.168	165.496	244.348	182.327	633.334	189.723	246.6	224.636	162.289	118.419	106.547	164.861	270.856	145.163	203.161	223.563	325.799
AMICA1	12006.8	8818.72	13640.6	9258.7	10442.6	5617.44	13063	10786.8	10077.1	9828.77	11803.5	12985.2	9038.94	14438.6	9777.65	11803.5	14886.6	9207.77	8295.32	11732.3	7187.35	8055.38	11401	8184.76	11089.3	12365	8950.71	6643.65	10332.9	13640.6	10975.4	8184.76	11401	7843.77	9731.52	16295.5	6004.76	10915.9	16936.2	12910.9	8734.98	14082.8	9828.77	12295	15390.6	11401	13992.6	13733.6	10283.8
AMT	190.217	252.202	146.431	207.93	244.069	113.153	191.833	152.467	207.793	216.106	117.491	171.126	267.712	159.083	136.224	122.283	98.4652	114.588	120.002	136.312	163.649	151.23	111.982	167.528	214.242	272.441	159.851	184.589	87.5638	263.527	219.542	216.271	132.75	98.5015	218.616	168.445	136.35	206.669	134.633	225.872	136.882	209.742	237.354	243.035	250.995	185.077	155.643	160.817	139.502
AMY1C	1293.96	1843.42	1038.64	861.66	1559.48	3212.12	1430.87	2930.62	1444.74	1420.01	1464.11	854.014	1532	2310.52	1407.78	2297.15	957.446	1549.87	2608.74	1301.65	1927.5	1491.02	1426.37	2005.29	1280.66	1497.93	1549.38	2906.16	2918.95	1589.2	2197.28	1327.98	2786.25	1660.56	1324.4	1250.75	675.764	1427.67	1062	1468.68	1370.46	779.051	1525.89	855.407	1013.91	1686.95	803.176	861.813	1042.41
AMY2A	77.6022	103.619	111.191	78.1483	73.8018	129.195	72.8825	140.091	59.0392	62.9151	33.9512	35.551	62.9374	130.936	63.6309	201.308	87.496	73.5534	146.541	61.6149	59.7195	65.898	145.081	149.398	69.1643	88.4992	81.4919	211.248	122.527	71.1623	82.6669	75.7043	145.761	60.8734	76.5512	113.714	34.8405	60.8326	35.8222	121.551	56.9859	33.7736	94.8895	28.8161	21.0373	90.2044	23.125	30.3396	100.662
AMZ2	878.461	1014.96	803.362	848.727	1050.65	1031.29	988.345	921.861	941.437	1101.53	903.17	1341.93	979.559	925.749	927.056	931.109	814.366	964.302	946.917	817.973	879.108	1083.72	994.41	1184.3	839.266	1032.09	845.402	767.696	754.95	1034.38	1104.38	1022.82	814.366	1007.92	965.892	1080.2	1032.09	1051.32	1038.06	922.398	846.583	1365.36	906.31	1264.97	1215.95	914.582	1050.65	1139.51	995.069
ANAPC1	130.746	132.677	80.6025	145.489	200.468	101.678	89.3294	121.519	125.427	132.444	103.731	158.827	133.338	115.317	83.4505	83.7305	46.0412	123.469	91.3364	139.004	137.384	153.749	70.5993	121.161	144.604	116.023	121.479	119.668	66.2545	114.715	183.761	152.456	96.1832	130.408	143.361	97.7404	101.311	127.645	72.2039	69.5747	102.502	122.574	121.208	174.396	119.185	116.284	104.935	114.722	63.2285
ANAPC13	1188.76	1183.38	1158.98	1155.07	926.394	1049.01	1039.44	1256.78	935.199	778.461	1214.86	912.207	1389.06	1012.83	1381.09	1591.26	1211.55	897.081	1226.84	1045.85	1118.65	1212.4	1062.01	1434.69	1192.04	1066.34	1242.16	1137.62	1676.43	592.747	894.169	1169.58	1379.73	776.352	1444.44	797.655	786.247	1381.09	736.729	677.146	1136.71	850.816	978.081	720.247	817.973	1213.66	946.917	1027.57	1200.56
ANAPC4	568.782	439.412	574.024	550.411	476.984	299.194	365.001	454.6	455.264	457.437	557.057	471.747	515.348	440.25	431.777	430.639	338.122	542.943	340.273	484.109	581.602	504.014	584.534	408.603	561.701	474.696	329.256	455.067	423.168	383.523	514.371	549.519	368.245	317.684	503.226	420.16	453.967	588.311	333.151	330.199	535.973	456.608	457.811	534.847	426.828	361.203	336.591	344.124	523.515
ANAPC5	863.423	1552.5	840.41	1134.94	1108.54	1559.39	1013.55	877.183	888.795	814.909	815.424	1130.29	1129.49	1046.6	843.789	1068.91	858.748	846.583	1359.77	897.081	1106.81	1078.51	635.809	1195.8	957.86	1088.16	1317.17	913.928	717.666	1229.68	1237.61	1180.08	864.028	986.172	1057.15	830.567	1025.1	903.906	911.642	850.357	891.226	1065.39	1494.62	1281.28	1124.13	1452.8	960.567	966.496	614.956
ANG	128.672	111.61	42.9547	209.941	113.298	197.372	174.919	93.6658	56.0979	59.9294	65.288	146.41	190.157	225.485	224.757	157.832	478.587	46.6668	168.021	96.8596	83.2294	96.4339	155.717	82.7235	137.531	136.444	124.135	117.76	185.706	164.023	154.037	113.124	178.442	100.203	98.1142	60.0952	83.9789	116.312	215.888	204.82	92.7493	225.016	79.8534	164.387	155.898	205.102	138.082	151.976	199.501
ANGEL2	155.844	130.721	224.298	170.955	153.537	106.006	139.753	163.805	156.743	125.034	126.061	108.946	178.699	175.81	124.238	125.617	89.0195	133.28	164.383	160.019	137.051	142.608	234.946	170.807	144.072	156.149	124.584	224.551	147.734	122.401	165.059	169.678	145.153	140.489	147.29	115.575	102.984	175.352	80.6663	116.085	144.746	74.7493	127.071	84.5986	82.6485	141.458	90.6973	95.4792	138.112
ANK1	26.7128	84.7076	28.4033	53.5786	55.7248	22.522	34.1371	50.2817	72.6027	71.6691	32.099	53.0264	32.4254	15.9771	54.739	51.9372	25.6332	73.918	58.0503	38.9641	44.8125	49.7493	17.4128	90.1403	59.0194	23.9885	54.0883	159.74	29.7596	19.0781	22.2813	62.5538	73.5493	128.608	49.4829	35.243	471.747	40.2816	71.2171	82.8227	35.9667	31.1886	32.3131	41.5891	33.1051	41.6166	26.1229	41.5743	78.4943
ANKDD1A	149.415	104.009	188.762	44.5522	172.671	126.21	98.6241	103.289	168.814	164.799	57.165	173.446	140.489	30.3346	137.332	102.487	92.6451	166.362	47.0771	125.903	150.788	153.486	213.874	150.988	260.434	137.425	49.3218	51.4747	63.3295	48.2497	138.15	59.4822	83.4069	45.4615	166.692	83.0866	64.8298	52.7682	40.9598	136.444	59.5552	116.72	216.841	41.9406	74.0692	60.6013	108.074	94.295	99.7337
ANKFY1	239.081	177.163	229.71	252.672	243.587	117.127	241.791	194.884	208.563	205.656	382.363	285.383	232.585	320.763	215.017	181.709	198.791	198.657	138.148	245.858	204.188	186.125	196.097	152.408	294.861	298.165	205.468	221.655	270.312	278.359	237.918	232.861	203.702	166.273	218.55	262.091	293.348	259.42	278.986	224.749	212.48	331.249	235.681	307.845	275.678	221.711	316.049	305.795	291.484
ANKMY2	174.073	200.502	163.4	187.035	176.55	204.772	68.8686	148.102	138.801	162.484	132.707	103.262	185.789	122.594	144.401	177.939	110.003	140.902	186.426	146.766	183.084	172.328	143.798	186.173	155.596	112.581	177.075	148.102	133.499	94.295	140.448	229.144	117.61	127.818	139.317	96.3695	168.115	160.817	68.0158	117.46	116.957	92.5519	178.101	97.2043	107.552	168.592	85.3598	82.9528	111.079
ANKRD10	109.241	117.358	153.828	96.9048	109.129	176.133	79.0083	128.244	96.5557	108.487	87.6471	57.5664	100.72	122.712	93.3565	192.931	98.8331	94.8282	168.271	99.0874	98.6521	107.733	186.294	181.275	86.8839	88.3575	104.539	193.128	110.963	102.578	128.697	121.23	127.106	167.468	118.186	111.433	79.3927	97.8296	74.5758	129.14	102.4	52.9196	96.7164	45.1042	40.5543	109.667	64.2741	51.524	90.6973
ANKRD12	764.314	482.435	753.529	645.765	706.072	514.111	288.286	438.432	578.498	605.069	570.31	460.407	672.294	396.235	568.483	613.283	400.592	656.216	507.986	699.886	526.837	500.897	982.451	589.949	594.051	443.636	397.206	504.587	409.493	285.928	383.311	601.999	512.191	447.365	672.722	536.562	457.61	547.071	351.405	395.601	559.595	392.02	450.149	350.238	311.868	402.228	379.359	351.866	809.47
ANKRD13A	1448.8	2421.98	1993.34	1794.2	1844.98	1531.43	1345.81	1836.41	1885.74	1844.98	2496.64	1817.78	1611.65	1554.08	1763.85	3195.35	2218.22	2039.64	2287	1931.32	1707.76	1591.26	2411.47	2218.22	1885.74	1487.19	2039.64	1810.86	1745.17	1386.12	1412.36	1858.39	1587.72	1959.52	1661.85	2496.64	2042.46	1510.42	1782.23	1689.84	1786.31	1584.37	1951.85	1199.64	1543.31	2058.11	1790.73	1661.85	2931.84
ANKRD22	80.1147	23.7364	132.047	53.6436	85.9801	36.1016	110.389	73.4613	145.988	185.077	4598.49	96.4056	94.9764	277.185	65.8976	96.811	88.7266	154.867	64.6618	173.328	21.8576	26.2669	46.574	46.1651	351.558	47.9437	81.5487	312.861	284.114	126.061	45.1582	107.594	116.125	111.494	89.1334	210.906	123.642	195.453	295.46	183.427	120.664	210.835	45.8618	29.347	141.31	98.712	83.6793	82.2211	493.59
ANKRD25	43.4372	100.616	150.439	85.3598	76.1304	5.02697	113.5	47.2106	45.6409	49.0523	44.8125	145.383	57.1804	31.3427	79.4878	35.0045	46.885	85.9318	33.3275	50.82	36.2977	27.2779	114.987	111.151	91.9416	40.9474	86.5338	214.525	26.2669	90.0268	45.0447	84.7076	103.828	80.6663	71.5502	143.889	433.073	85.6678	70.9222	151.635	74.3846	74.0462	49.7189	109.174	54.916	32.2878	79.6406	77.4262	122.089
ANKRD30B	2798.61	2330.05	3724.97	2978.16	2564.49	2414.83	3056.24	3880.5	3479.76	2652.84	1792.75	2593.06	2798.61	4365	2824.42	2593.06	2999.3	4989.72	2753.32	2999.3	2952.75	2699.22	4484.88	2344.05	2942.43	4120.54	3410.72	5131.64	5704.39	4385.86	4540.96	2267.96	4331.3	1267.51	2593.06	3652.13	1384.8	2686.36	2365.62	3949.22	3035.86	2993.66	4951.22	3800.7	2673.75	3638.7	3755.13	3762.35	3116.46
ANKRD33	233.028	135.852	254.226	152.234	157.043	171.179	404.353	231.898	105.183	85.388	101.575	225.414	157.581	288.042	217.403	319.079	446.941	58.8448	298.96	117.358	101.09	73.1307	321.908	237.169	167.345	375.841	230.512	231.492	322.791	411.491	324.929	172.793	362.505	229.435	310.081	343.227	177.644	218.475	429.659	434.079	236.469	198.957	153.587	183.191	307.265	222.816	315.798	279.198	181.398
ANKRD40	101.385	130.627	147.821	135.887	117.425	138.363	164.961	96.3126	131.519	87.5406	120.464	189.461	148.852	93.9904	181.949	99.9791	184.463	130.16	132.17	128.65	112.864	79.75	170.102	119.013	141.787	115.864	139.712	104.834	125.404	189.639	110.904	120.39	136.267	139.073	167.528	187.427	264.024	139.99	177.478	184.4	150.439	162.027	102.129	167.4	144.348	124.995	205.123	150.072	149.277
ANKRD49	437.41	406.165	559.293	515.348	571.488	595.042	358.384	507.749	486.145	495.447	434.288	390.793	474.45	350.815	499.916	447.973	362.192	323.527	523.515	563.424	412.002	450.375	668.354	488.707	414.959	413.097	371.994	388.883	379.947	311.771	355.528	452.262	394.791	366.513	443.828	462.743	413.824	483.137	252.692	404.948	455.455	360.486	350.66	327.556	277.957	398.972	268.907	288.181	485.618
ANKRD55	180.593	102.261	136.479	136.049	144.648	117.13	99.7622	170.642	155.7	149.978	61.3434	81.9415	131.689	142.508	112.049	143.705	71.3508	118.468	97.7078	96.3695	104.343	111.433	52.9737	108.79	72.4017	122.365	129.093	134.506	90.762	105.973	74.9472	62.6489	133.159	43.3086	103.887	85.7003	59.9843	75.966	87.6983	79.4165	98.712	133.418	74.3846	92.3386	124.019	97.7384	54.4403	67.1904	130.802
ANKS1A	366.513	368.084	234.61	411.651	442.363	240.401	253.718	342.7	313.483	313.85	409.851	325.46	356.182	357.529	373.442	561.385	519.853	371.068	292.667	359.446	351.405	343.076	324.139	303.258	407.905	258.526	365.479	357.236	454.6	289.467	215.185	374.848	349.345	416.109	428.394	501.363	370.387	383.989	432.456	553.546	365.001	299.776	345.902	337.593	282.623	369.043	391.317	376.708	703.271
ANKZF1	165.674	237.085	164.331	177.36	160.068	137.332	227.242	212.231	201.792	223.579	143.302	256.031	196.593	268.42	155.018	217.482	241.274	251.436	190.485	193.321	231.313	194.203	172.894	190.217	162.589	257.842	166.735	211.875	219.998	304.437	245.826	167.528	200.697	190.909	172.51	263.425	163.4	158.823	392.402	241.102	170.589	320.179	256.786	333.692	248.881	185.726	307.14	266.195	188.454
ANP32B	4291.74	6084.23	6689.85	6316.62	8093.12	5227.23	4014.95	4188.97	6529.99	6857.43	3158.25	3526.79	5041.33	3871.13	5633.36	3472.43	3128.23	5349.68	5580.41	4429.51	4472.42	4752.94	6084.23	5070.67	5131.64	3638.7	4897.01	5393.56	3219.32	4657.01	5653.01	5210.44	6783.14	4496.64	5302.1	5393.56	9622.84	4110.89	3139.78	4033.76	3716.6	3403.34	4120.54	3587.28	3045.35	4344.26	2978.16	3041.25	5425.13
ANPEP	624.686	639.466	702.862	568.206	419.797	615.627	903.17	919.201	707.351	665.076	344.418	879.108	634.479	830.068	547.071	1419.28	1165.84	1185.38	1035.24	654.732	949.044	790.597	617.955	1249.18	585.502	772.931	590.255	441.092	1384.8	724.361	643.529	567.063	1222.57	1643.24	550.673	923.729	630.728	527.416	1754.3	601.326	677.146	600.075	909.99	440.863	1005.75	860.392	1086.51	1010.5	744.443
ANTXR2	771.882	1124.13	1090.02	791.059	675.645	864.608	627.228	746.245	674.766	780.361	1026.72	772.931	614.616	929.81	888.272	1602.81	952.99	983.21	983.21	1088.16	626.582	749.508	1747.09	926.394	697.297	558.97	697.297	1035.24	961.204	659.517	661.027	787.24	831.573	973.965	604.417	1044.31	586.07	593.053	858.265	688.115	694.774	524.91	573.418	471.949	547.352	653.681	522.487	640.859	1083.72
ANXA1	3041.25	4717.03	4484.88	3003.65	5440.46	5507.83	2798.61	4462.03	3355.28	3512.19	3465.92	2652.84	3308.07	3681.08	4752.94	5507.83	4223.35	2988.57	4644.89	3270.18	4484.88	4780.86	6365.82	3917.18	3755.13	2379.75	3219.32	6151.17	3621.68	2283.43	3607.69	3050.34	2766.7	4071.22	2455.24	3390.02	2560.5	2682.59	2721.51	3151.61	3491.84	3786.27	3403.34	2824.42	2771.17	3116.46	2276.93	2196.73	3666.03
ANXA11	485.024	502.418	525.443	426.478	558.294	246.906	696.912	493.151	682.86	696.243	458.165	634.526	553.473	746.501	479.617	380.179	740.612	1073.44	282.84	596.408	841.83	914.547	557.857	312.783	512.104	719.259	577.029	480.72	605.679	641.833	765.724	477.21	513.833	363.282	581.192	845.853	376.184	525.764	490.483	1037.91	530.992	617.316	614.474	871.033	702.932	873.525	941.055	978.138	599.831
ANXA2	120.664	152.682	175.923	159.889	208.992	276.733	364.037	198.439	114.949	121.538	349.387	181.594	179.261	267.099	255.811	95.2852	252.427	93.2335	122.667	122.018	131.624	147.998	180.534	70.2809	161.63	236.706	214.309	112.682	246.489	248.097	307.049	106.336	223.668	114.636	110.369	157.448	149.92	128.809	225.363	167.2	136.199	270.028	205.887	219.624	254.338	273.747	176.201	193.796	115.955
ANXA3	858.265	155.643	552.45	308.781	317.961	253.255	367.601	362.358	220.669	227.683	938.309	207.731	406.883	199.118	425.092	721.931	1268.47	291.531	487.768	323.159	121.496	133.196	867.834	287.922	361.073	408.43	284.226	1933.93	498.052	295.363	273.967	253.349	658.827	427.025	244.826	726.131	92.216	502.07	495.677	2137.27	582.234	200.432	140.712	43.0694	271.219	233.27	147.96	143.217	707.865
ANXA5	1118.65	1628.84	1731.12	1236.63	1422.2	1389.06	2519.68	1941.48	1426.1	1546.17	2425.22	1981.85	1368.14	1735.25	1647.33	927.056	1844.98	1142.38	899.015	1268.47	2313.73	2200.05	1081.83	1243.41	2006.73	1387.66	1257.92	1481.27	1981.85	2042.46	1741.11	1482.6	1931.32	1452.8	1262.7	1183.38	1467.93	2242.91	2137.27	1817.78	1788.54	3073.22	1481.27	2963.13	2523.94	1387.66	2180.75	2264.59	1115.7
ANXA7	565.978	478.1	663.345	588.97	715.484	545.904	436.551	514	638.546	560.708	432.07	410.802	584.763	361.126	553.92	452.874	445.603	466.37	505.129	614.92	661.508	713.712	556.388	507.387	617.644	443.926	488.186	519.653	448.564	361.774	412.103	669.181	518.746	567.787	629.927	522.81	590.827	607.748	280.219	512.848	578.191	446.914	421.292	350.132	373.886	469.606	409.069	458.403	474.543
AOAH	541.79	581.287	421.871	575.233	458.037	243.462	859.796	634.802	501.806	509.255	669.432	761.127	524.096	854.794	616.679	762.449	1561.1	525.75	426.258	720.754	644.573	569.165	556.776	523.017	655.85	613.871	687.678	658.502	757.91	666.227	427.23	379.81	744.015	506.486	605.372	710.48	442.145	707.865	1432.13	986.927	600.71	635.48	660.67	644.988	605.985	477.64	962.129	851.894	769.461
AOF2	223.822	256.876	173.215	239.505	260.718	202.329	240.322	247.574	195.128	184.061	193.525	285.812	211.607	267.311	169.851	182.387	150.388	150.253	213.728	224.707	231.492	196.274	149.136	217.187	229.063	291.991	268.529	236.077	221.438	331.815	343.519	208.776	198.754	177.424	217.957	182.2	161.074	221.965	227.242	165.272	172.738	281.088	273.424	347.87	252.59	249.421	256.384	259.332	131.137
AP1B1	324.809	229.371	229.59	293.346	323.889	182.495	333.151	249.421	243.217	270.605	385.55	238.786	354.258	264.024	275.406	204.083	290.062	274.186	221.058	280.759	271.32	302.758	212.597	213.433	355.801	251.336	264.202	267.712	326.644	266.195	256.678	305.168	278.876	297.455	404.154	186.659	207.02	275.617	194.59	321.62	259.058	219.998	235.725	353.384	269.83	241.857	277.089	233.863	307.025
AP1G1	284.226	383.523	565.259	457.811	412.002	280.122	358.096	456.339	425.092	517.198	438.245	338.243	411.115	445.789	375.492	386.077	434.288	503.226	225.022	494.77	380.093	491.513	628.347	286.941	265.739	311.062	270.512	334.386	439.015	478.18	450.818	273.638	408.603	364.688	381.856	574.024	280.652	329.367	527.995	392.402	242.109	284.012	385.418	334.386	322.914	280.122	420.16	384.943	393.793
AP1G2	147.639	288.305	76.8207	168.159	176.559	190.621	196.309	205.713	177.996	173.422	164.39	175.664	150.488	191.645	151.418	207.681	218.377	170.842	272.25	146.969	182.656	168.262	73.8054	299.285	158.014	180.291	187.335	247.414	209.853	220.325	184.152	148.221	216.557	161.265	124.015	125.05	148.024	138.021	266.303	132.627	127.868	214.075	258.665	223.317	215.115	229.763	166.471	174.564	131.585
AP1GBP1	85.2515	66.8043	125.076	108.866	146.912	139.502	100.423	113.578	117.692	124.394	100.392	173.109	125.287	84.0741	136.923	47.9019	72.3614	114.782	26.2226	146.176	97.0707	127.949	145.753	43.4111	92.6451	126.21	72.1834	64.5116	83.1891	177.424	139.712	98.3007	95.1298	84.1539	101.218	160.76	112.753	104.009	112.332	101.192	88.6996	175.81	116.231	223.038	176.792	92.523	169.95	192.392	72.7447
AP1M1	1049.01	1022.1	753.97	1047.51	1254.47	750.437	1400.99	1335.26	894.169	887.483	927.056	1174.69	1123.43	928.403	1135.75	919.863	1095.8	1073.71	859.266	1180.08	907.452	843.207	896.453	879.108	1162.05	1274.43	1007.12	1090.84	1228.77	1463.64	1033.64	997.347	1186.55	935.199	1311.85	1104.38	813.251	1127.52	1188.76	1311.85	988.345	1223.75	1074.48	1335.26	1469.35	1086.51	1368.14	1534.59	1020.39
AP1S2	3050.34	2323.91	3732.41	3499.14	4439.49	3128.23	2354.13	3376.55	3864.03	3824.37	3571.61	3050.34	3607.69	2618.34	3629.59	2543.82	2190.39	2762	3195.35	3045.35	3659.42	3864.03	2242.91	2447.84	3263.72	1971.52	2531.92	2798.61	5070.67	1917.26	1921.38	2784.93	2747.71	2236.86	2810.08	1670.94	2233.48	3600.77	2261.82	1232.97	3181.85	3035.86	2063.84	3083.79	2390.52	2202.81	3263.72	3403.34	2091.1
AP2A1	79.6353	205.068	44.8534	150.184	99.9963	96.5238	138.457	99.033	128.487	135.163	89.6974	137.664	82.0899	34.3113	101.721	153.546	133.186	240.605	156.987	96.8823	167.482	150.208	78.0919	207.424	130.442	75.7469	168.599	110.853	95.2299	93.4763	24.7362	116.763	110.28	294.806	135.336	79.6436	476.045	145.646	86.6681	138.66	163.18	103.467	118.864	101.565	83.0742	108.727	103.318	104.041	145.21
AP2M1	515.124	965.892	450.818	733.249	838.049	534.054	815.948	491.285	819.173	726.915	428.601	803.852	474.696	369.653	511.944	626.246	541.233	1053.87	847.57	473.751	710.48	555.608	546.236	842.563	646.519	362.976	531.835	578.498	461.546	853.111	404.558	820.648	678.638	1181.15	794.086	631.082	1915.12	647.736	676.379	686.399	793.073	665.861	555.342	856.536	579.467	492.679	718.868	647.346	550.902
AP2S1	3622.41	5400.9	4213.79	4705.95	4024.99	3581.55	5539.59	3699.73	4236.02	4776.58	3374.68	5484.1	3835.36	3499.41	4219.93	2812.39	4325.84	3918.53	4057.09	3492.87	4110.46	3998.18	3843.04	3501.47	4527.97	4021.89	4539.37	3687.78	3746.8	5571.14	4027.94	3498.18	3788.48	5376.78	5001.6	3410.32	7827.31	4184.65	3570.31	4173.27	4190.01	3773.38	4422.05	5469.96	4829.35	4274.99	4379.91	4748.67	3050.71
AP3B1	1016.42	1030.6	1001.33	870.831	1305.87	1223.75	827.159	1005.09	1048.2	1098.24	965.892	1276.61	1131.24	773.419	969.481	952.229	1144.04	999.737	854.794	1001.33	1037.5	1158.98	1095.03	938.309	848.727	706.939	1007.92	1112.79	1030.04	938.876	783.269	943.551	1115.7	1014.96	1061.3	1107.62	885.155	935.199	1114.81	867.834	962.87	1138.5	873.045	1073.71	1140.44	721.519	977.368	1099.89	995.886
AP3D1	271.538	404.74	148.709	234.037	194.726	362.192	255.935	269.924	225.798	214.819	228.737	218.232	248.971	262.226	229.371	300.228	288.042	259.147	310.95	233.524	319.224	272.441	145.796	303.499	223.261	270.512	313.721	234.543	258.21	252.389	205.054	279.198	258.325	345.153	299.521	193.779	257.842	229.513	327.273	281.702	238.268	243.379	341.682	321.518	278.991	304.312	328.598	314.876	280.852
AP3M2	274.662	175.909	186.294	303.856	195.828	140.31	168.226	189.639	207.859	193.128	142.553	188.181	189.829	163.59	206.669	166.103	91.8906	138.801	201.036	240.244	216.182	184.53	166.103	147.136	257.842	238.786	137.799	181.22	71.5292	178.938	285.273	232.402	195.765	199.521	138.15	161.831	122.821	198.89	140.31	122.244	157.093	224.854	198.038	192.392	199.735	133.196	131.734	146.82	103.225
AP3S1	568.483	422.988	692.42	508.723	749.038	582.595	690.546	521.385	556.215	577.599	690.194	436.666	667.302	572.689	864.608	308.074	679.703	432.882	335.093	592.48	611.886	556.215	897.081	310.561	476.526	676.034	451.236	563.424	558.331	637.626	463.226	503.5	546.808	656.93	540.968	844.361	392.02	592.116	664.226	873.623	668.354	640.859	412.569	465.787	658.113	497.078	599.207	565.259	598.313
AP4B1	351.558	535.697	531.835	383.311	566.462	435.436	459.146	466.883	290.062	384.635	359.286	501.363	429.44	638.707	409.135	325.213	347.752	408.43	289.59	482.869	431.991	422.408	540.968	371.408	376.007	625.494	395.772	437.623	293.007	621.031	554.963	294.901	389.352	278.065	322.017	404.353	390.793	337.986	341.402	473.751	298.599	535.697	571.488	595.36	430.039	456.832	449.551	460.407	293.554
APAF1	1383.46	1275.4	1800.24	1253.41	943.551	1204.66	1341.93	1471.05	1084.74	1217.02	1317.17	1102.44	1400.99	1790.73	1541.66	2267.96	1672.87	1986.53	1815.74	1883.59	1138.5	1354.69	2161.88	1658.55	1082.88	1271.17	1207.99	2316.63	2884.29	1262.7	1136.71	1498.04	1894.74	1432.13	1561.1	1888.19	1053.09	1463.64	964.302	1665.35	1598.17	965.892	1325.19	734.883	899.66	1420.77	1163.81	1158.02	2280.13
APBA3	616.679	446.941	129.558	448.547	428.394	369.043	474.45	409.314	435.043	464.537	443	430.639	475.391	294.788	475.391	530.198	510.855	346.201	506.748	431.991	404.948	404.558	116.878	389.352	515.348	457.043	583.61	308.186	427.025	338.841	312.225	588.311	364.836	566.826	421.871	298.042	456.125	506.748	520.605	438.016	494.316	511.633	463.226	539.299	619.687	499.684	477.877	578.498	432.666
APBB1IP	2153.52	1817.78	1329	1860.5	1222.57	1517.46	1579.07	1826.98	2116.68	2058.11	1701.32	1424.72	1467.93	1358.41	1512.17	2942.43	3170.44	2669.88	2560.5	1979.77	1901.85	1951.85	2276.93	2455.24	1628.84	1459.02	1817.78	1925.85	3077.9	1632.34	1451.42	1517.46	1988.64	2780.14	1456.17	1756.34	1053.87	1847.22	3083.79	2249.25	1883.59	1478.33	1971.52	1359.77	1633.92	1693.47	1881.38	2017.34	2212.25
APBB3	1410.9	1077.75	258.697	1082.88	1169.58	759.434	721.127	823.52	1101.53	1142.38	587.341	1041.02	1081.83	531.528	1003.74	1286.11	1842.77	727.285	1088.16	881.852	1039.44	1038.72	205.416	946.282	1001.33	922.398	1170.38	854.794	970.769	638.336	589.949	1144.04	1071.1	866.551	1395.65	480.541	991.074	1005.09	1606.56	1003.74	906.95	1220.24	1103.5	1049.01	1048.2	1355.92	1105.15	1115.7	708.29
APEH	450.149	799.116	340.392	524.91	570.614	644.573	617.955	591.527	500.146	542.025	487.768	545.084	487.322	538.965	462.743	533.477	578.805	469.584	638.336	466.238	547.641	507.749	305.81	655.49	519.048	629.659	661.027	568.206	485.618	528.78	554.106	467.534	472.201	685.538	483.625	369.199	682.628	481.279	685.177	605.069	472.473	545.673	772.931	626.895	589.524	694.028	594.39	564.011	414.959
APEX1	756.405	1160.06	556.491	871.346	1002.02	1170.38	715.957	879.108	802.351	836.486	664.621	915.938	1053.87	758.417	733.643	623.027	611.886	668.354	1200.56	839.266	1071.97	1148.02	427.23	1151.16	698.954	864.028	1091.66	875.966	540.968	738.504	960.567	919.863	592.116	1010.5	741.584	470.331	670.146	729.71	572.401	524.342	735.316	744.443	1029.23	1054.7	741.008	964.302	704.512	707.351	319.372
APEX2	106.787	234.395	62.5946	109.667	127.989	210.047	120.998	128.44	139.226	143.889	157.093	140.358	105.21	76.4739	112.332	206.099	189.956	139.028	177.424	99.7622	164.6	169.554	47.6665	156.046	133.499	119.547	238.268	132.289	125.98	90.4672	100.518	144.208	124.549	225.634	134.755	77.3783	201.973	117.529	159.027	106.101	105.736	138.592	208.971	156.536	148.102	222.398	121.862	121.572	98.6241
APH1A	580.648	324.004	307.951	445.965	436.666	516.415	482.435	659.168	526.551	564.011	627.613	657.337	409.135	444.803	507.986	550.673	389.875	567.936	361.755	480.541	603.432	608.799	284.428	677.53	574.67	520.123	359.286	399.119	570.31	501.11	483.625	538.697	504.014	621.693	466.238	430.639	350.531	541.533	596.661	329.652	687.678	641.967	479.328	735.316	726.915	350.238	690.86	642.736	525.75
APH1B	227.074	209.594	146.618	143.217	142.12	117.725	297.926	135.592	150.211	172.793	296.634	218.392	142.697	155.248	200.227	318.328	387.043	226.183	179.967	196.148	229.513	204.161	250.53	206.249	261.605	180.541	189.227	146.72	227.461	254.487	151.504	213.282	162.957	313.983	166.415	281.52	180.418	248.116	281.088	460.837	283.049	259.988	206.883	154.027	253.255	201.727	259.606	226.112	327.556
API5	336.428	529.033	441.952	496.123	419.237	676.034	243.706	426.828	466.238	430.639	485.935	274.662	440.863	268.807	340.974	455.264	294.47	441.328	565.534	433.906	488.923	473.962	374.055	567.063	339.405	276.124	465.354	500.897	352.764	193.461	344.862	383.694	296.754	390.387	404.353	217.267	399.26	366.222	235.308	212.231	307.505	245.826	453.52	303.727	268.807	381.365	232.312	218.552	250.995
APIP	278.286	153.007	311.449	242.039	313.23	350.393	169.851	201.661	228.588	199.255	256.483	134.086	296.411	192.805	348.891	135.632	206.95	163.186	168.323	253.523	249.248	252.692	227.683	193.321	213.799	204.224	168.009	295.145	227.683	158.571	246.856	276.242	166.103	268.027	207.793	140.039	209.888	293.122	139.845	150.211	285.928	212.675	167.627	131.85	167.528	167.288	162.137	151.59	187.315
APLP2	231.148	236.172	244.256	250.914	208.578	217.332	488.274	383.989	244.352	273.24	194.462	390.213	200.432	432.666	279.723	322.272	455.067	360.763	233.445	259.787	309.595	307.14	241.757	212.951	225.957	286.034	287.922	299.639	623.027	415.151	422.069	194.59	429.844	336.285	276.377	428.394	172.51	247.75	980.234	232.212	251.083	503.012	308.074	519.55	517.198	288.91	588.931	697.297	311.449
APOB48R	189.829	139.845	126.606	145.383	135.1	245.58	138.592	226.417	150.118	144.118	250.029	258.21	106.787	284.525	242.367	358.979	365.64	359.446	244.069	180.715	293.787	248.709	129.014	248.116	150.031	258.609	314.096	187.938	380.521	150.345	307.025	111.285	220.669	138.112	187.997	192.567	175.296	177.189	819.689	226.664	255.397	317.407	206.174	148.946	564.011	201.539	376.341	403.093	285.273
APOBEC3A	69.1543	145.988	150.118	49.4994	68.4668	118.978	70.4024	196.211	80.1698	85.9574	58.6009	5.93913	29.117	191.583	55.8975	454.6	270.914	66.7815	380.88	61.6818	73.2709	75.087	249.52	261.922	47.6958	93.7549	176.843	428.825	350.087	82.7243	146.568	53.627	306.051	119.778	113.363	129.356	66.9285	46.0435	11.3034	190.018	60.8551	7.50925	109.598	4.74523	8.00441	177.248	7.22986	7.4722	80.3389
APOBEC3G	214.242	224.071	141.222	145.939	206.82	182.612	211.875	184.201	152.183	154.288	392.591	323.159	131.85	282.807	198.425	121.341	120.13	154.027	151.741	156.641	227.242	199.118	132.328	263.923	229.948	269.112	216.404	90.6973	148.102	407.406	309.595	264.581	118.978	122.365	137.144	216.271	271.916	235.553	255.758	147.049	225.253	374.226	260.261	393.618	333.151	192.634	295.257	308.553	154.916
APOL3	152.554	164.028	187.388	185.827	132.595	168.244	230.549	207.527	245.046	264.182	592.292	238.428	193.802	302.599	114.629	123.114	125.25	217.486	168.762	173.267	206.593	202.796	90.249	211.011	222.911	213.238	249.706	152.822	161.311	216.505	304.601	185.071	149.199	128.101	142.621	100.181	223.851	193.613	218.987	80.5333	151.234	290.443	288.719	267.711	237.498	203.752	235.655	229.853	100.42
APOO	164.534	145.293	204.224	209.594	182.138	170.691	183.361	150.072	162.754	120.311	192.519	228.407	176.373	109.767	197.06	125.36	212.447	149.829	170.2	194.133	152.763	118.431	229.226	156.293	197.505	154.34	147.136	129.727	140.671	139.502	163.895	209.394	196.855	167.576	185.018	183.778	279.082	207.087	229.763	152.618	215.858	277.625	125.287	253.437	203.635	166.853	237.847	222.331	195.06
APPBP1	301.903	249.642	290.396	330.211	337.157	357.201	146.234	309.66	262.787	321.608	234.23	190.988	340.907	225.1	270.85	229.376	124.056	185.498	297.044	349.3	310.464	359.48	235.246	292.398	276.098	223.089	252.109	230.699	119.76	162.915	325.094	363.373	227.563	232.039	270.668	166.396	270.811	293.058	146.299	149.756	256.541	218.404	243.784	203.513	230.979	189.991	157.089	172.359	153.928
APPL1	155.16	196.665	200.153	203.697	197.636	242.039	203.199	219.542	170.855	171.54	179.775	208.655	168.592	161.639	205.35	179.605	250.722	143.517	203.825	170.427	158.405	142.371	242.603	175.042	154.442	194.925	210.693	214.394	223.579	211.404	174.073	154.091	326.25	223.906	200.372	194.59	318.826	172.793	229.144	200.303	220.464	215.327	156.102	214.32	199.67	160.92	261.605	208.723	155.542
APPL2	248.355	293.554	242.039	251.622	195.566	222.059	118.026	156.536	229.675	258.325	190.348	176.311	190.42	124.663	237.592	461.546	332.594	261.396	372.796	206.95	228.177	245.069	332.093	437.033	184.837	127.037	203.955	245.231	296.059	99.3349	134.971	251.436	236.24	246.856	229.513	190.485	252.59	255.585	225.705	178.502	187.563	169.793	251.436	114.372	101.158	245.145	170.807	154.236	296.525
APRT	457.508	354.835	160.121	450.297	260.715	378.116	573.715	439.479	410.542	430.236	394.114	609.685	419.178	418.132	404.007	261.542	306.977	352.361	464.182	365.452	577.482	528.109	125.639	435.954	383.536	641.581	462.949	312.419	343.031	529.38	521.504	523.024	340.813	570.927	449.925	210.18	282.197	468.566	571.504	281.735	394.627	720.803	553.627	842.761	716.074	424.078	687.314	678.271	211.276
AQP9	10552	7843.77	7498.55	8473.48	9872.88	5196.71	7624.37	6643.65	8734.98	8295.32	12154.9	9417.09	8324.22	7721.78	9928.79	13901.2	17655.8	7877.18	6760.51	10173.9	6737.8	6271.55	12006.8	8547.66	8989.69	9129.05	7266.94	6783.14	10077.1	8950.71	7624.37	7954.86	8583.21	7954.86	8862.19	16614.4	6127.38	10608.5	10499.2	16104.2	9928.79	8023.43	6760.51	5378.32	7721.78	7781.47	7914.15	8583.21	16201.1
AQR	175.296	207.731	164.156	197.322	182.733	165.933	250.029	204.014	171.126	181.894	181.894	271.825	172.231	211.19	157.395	179.169	186.533	161.39	143.217	225.253	188.635	180.904	157.441	169.678	196.928	219.773	206.95	171.765	194.59	254.409	227.54	192.867	156.95	148.709	176.251	190.42	171.072	198.425	215.327	167.677	158.876	272.441	240.401	362.661	255.935	189.956	318.328	278.481	152.183
ARAF	135.592	165.32	80.144	120.503	104.306	170.855	181.337	188.051	183.191	145.512	114.44	219.166	110.645	116.917	83.1627	231.973	190.649	229.371	307.73	105.056	153.537	161.028	102.889	230.512	141.179	124.094	159.434	196.665	206.249	183.191	113.817	150.118	194.802	287.588	134.59	120.788	173.662	130.16	279.817	160.019	149.415	159.269	202.803	165.789	147.393	144.502	188.697	204.705	141.135
ARCN1	1061.3	1261.39	1248.14	1210.34	1543.31	1592.97	960.567	1185.38	1372.25	1276.61	1365.36	1103.5	1319.8	1172.69	1215.95	1135.75	1102.44	1273.4	1045.85	1335.26	1456.17	1410.9	1121.44	1121.44	995.886	881.852	1155.07	1071.1	1146.97	1197.68	1327.78	1206.86	1124.96	1275.4	1433.28	1138.5	1064.59	1162.82	1175.73	924.366	1110.27	1025.88	1277.81	1344.57	1153.05	1081.83	1071.1	1095.8	1229.68
ARD1A	426.658	562.011	121.112	382.658	376.708	422.408	390.945	267.712	347.87	274.565	357.072	334.242	392.92	232.691	485.105	509.255	527.066	353.083	395.926	502.563	322.52	271.43	99.0226	359.764	408.242	393.618	628.656	292.882	299.776	257.563	281.52	545.084	307.951	497.796	502.563	237.354	529.91	438.826	294.365	352.764	542.943	326.644	558.97	377.68	290.847	574.024	302.294	289.59	354.438
ARF1	1866.16	1969.21	1339.01	1667.69	1732.49	1519.14	1969.01	1896.24	1897.34	1905.53	1634.23	1922.18	1642.87	1803.41	1914.1	1952.32	1964.77	1837.67	1443.83	1542.23	1864.22	1674.79	1199.42	1792.41	1755.5	1780.95	1704.07	1973.67	1963.13	1948.74	2044.25	1681.69	1850.03	1651.92	1578.44	1973.21	2469.29	1666.21	2233.5	2296.82	1567.4	2047.12	1836.36	2395.31	1764.16	1997.86	2229.06	2375.83	1829
ARF3	424.52	673.497	708.29	482.166	337.851	564.358	636.572	706.497	626.246	543.25	687.678	594.716	392.02	646.519	513.265	591.527	691.617	554.377	878.461	445.965	634.479	654.732	526.837	687.678	381.856	505.733	506.978	640.171	880.833	511.125	551.499	433.073	684.354	584.238	463.432	512.191	454.39	415.538	1071.1	597.956	405.988	658.113	591.527	620.337	636.188	622.325	676.379	636.572	522.159
ARF4	557.012	533.466	641.002	472.129	706.515	782.066	569.186	422.239	611.162	518.255	496.276	577.448	504.031	515.492	662.705	470.889	661.561	432.107	449.132	601.134	560.791	416.983	707.542	379.605	525.726	523.043	511.709	473.817	589.474	428.171	595.365	612.453	526.542	487.689	547.949	544.217	496.485	506.428	477.743	543.847	495.796	538.363	482.506	511.197	550.961	527.884	490.471	539.491	523.602
ARF5	1026.72	683.936	802.866	1088.92	816.474	1158.02	1348.29	1081.01	1268.47	1144.04	1389.06	1372.25	1022.1	1244.6	1204.66	1271.17	1136.71	1111.84	982.451	868.986	1327.78	1153.99	719.719	1073.71	962.87	1231.98	881.852	1068.91	1071.1	1198.65	943.551	1034.38	985.426	1892.77	1350.99	962.87	986.172	894.169	1557.45	988.345	1339.56	1532.66	847.57	1594.73	1479.87	938.309	1528.33	1400.99	1001.33
ARFGAP1	209.594	226.033	62.9567	156.046	170.151	197.2	264.378	226.574	186.903	198.559	161.639	287.154	174.868	220.073	137.649	286.15	252.907	270.017	241.433	174.469	248.275	243.133	72.7447	255.397	221.269	222.132	208.723	201.12	247.491	219.1	236.24	178.882	185.477	224.298	161.831	167.4	172.328	174.301	457.437	204.918	162.912	293.91	300.122	372.486	266.393	227.875	343.076	393.437	193.849
ARFGAP3	523.251	298.49	361.379	345.153	507.986	529.91	398.797	351.405	378.9	387.596	429.844	555.608	415.723	434.079	477.64	394.089	487.322	417.016	296.059	480.957	473.962	443.431	441.952	361.555	345.153	366.806	315.01	322.914	359.913	505.256	539.569	393.274	354.258	367.101	352.609	638.707	296.754	444.803	701.106	525.75	476.739	587.658	303.727	702.049	504.014	300.228	686.834	694.429	403.986
ARFGEF1	631.453	416.677	776.352	564.011	659.168	443.636	392.02	489.194	589.949	625.178	550.12	491.945	538.181	475.624	542.346	566.147	518.781	643.529	427.454	697.297	559.595	593.053	757.39	502.563	434.079	381.697	416.501	723.174	492.908	392.02	442.769	510.015	548.2	578.221	547.939	538.697	597.34	529.033	559.595	467.309	441.092	431.991	404.353	488.274	461.827	379.81	505.256	509.002	611.22
ARFIP1	184.728	174.706	480.801	252.758	223.585	329.019	154.538	260.62	267.424	305.479	428.643	202.489	269.443	270.804	322.964	332.131	195.948	330.072	229.14	332.556	211.92	232.051	457.191	279.885	183.346	153.051	268.663	196.678	482.544	214.774	180.96	215.728	237.986	209.845	245.616	276.965	176.135	261.455	136.067	221.02	229.683	177.069	196.076	111.216	137.688	175.602	165.998	181.816	388.656
ARG1	368.739	215.554	979.559	143.798	222.488	86.8839	421.462	173.662	227	206.174	113.537	363.944	224.369	277.841	793.455	873.045	1338.1	384.795	187.113	432.666	101.575	99.7337	2704.03	190.275	119.372	303.499	113.923	2539.6	297.569	271.022	145.902	216.978	264.772	592.48	355.385	1957.11	267.413	144.023	581.287	2963.13	670.881	104.245	90.9061	87.2811	412.408	299.776	229.59	214.676	2183.75
ARHGAP1	2150.54	1409.48	854.209	1592.97	1613.14	1057.98	1592.97	1515.5	1354.69	1568.32	1355.92	1654.65	1771.7	1661.85	1849.69	1448.8	1422.2	1363.83	1228.77	1874.32	1592.97	1580.9	880.833	1226.84	1665.35	1670.94	1534.59	1415.16	1621.62	1705.67	1452.8	1663.9	1488.58	1436.98	1908.11	1353.7	1269.74	1758.13	1609.86	1864.93	1616.7	1375.24	1580.9	1762.13	1747.09	1625.17	1912.55	1969.24	1564.71
ARHGAP10	72.4247	103.794	41.5209	93.4184	102.098	31.5178	121.379	69.0497	38.0501	41.2444	106.388	82.5473	103.663	108.216	110.316	53.2036	143.116	42.3098	73.0857	109.934	45.8495	44.4749	30.1648	66.7133	69.5677	124.394	123.147	34.3767	33.7147	147.44	123.68	78.7682	38.6228	58.0853	104.992	108.79	109.425	83.0586	141.502	107.354	74.0951	107.733	135.77	162.912	179.967	113.617	143.617	128.077	64.4523
ARHGAP12	101.484	62.7178	145.753	116.125	140.627	114.477	34.862	98.6521	109.388	121.938	93.7238	58.1308	134.256	84.6213	115.897	103.975	65.8306	120.625	88.2389	116.199	116.838	141.267	207.453	103.663	84.8781	47.2686	53.5606	87.8418	111.944	42.2046	78.9389	93.2671	74.5268	57.5086	94.1994	97.4704	94.8595	79.75	54.5138	75.791	69.5026	59.81	65.4186	29.8896	53.4952	56.9077	42.0425	51.8781	77.144
ARHGAP15	1528.33	1993.34	1802.48	1417.97	1546.17	1663.9	817.973	978.755	1427.71	1375.24	1029.23	1076.83	1107.62	1014.96	1242.16	2167.89	1870	1133.06	1954.54	1304.69	1444.44	1399.5	2459.64	1949.72	1098.24	1419.28	1276.61	1198.65	759.434	793.073	1174.69	1507.5	1304.69	1505.86	1226.84	1544.74	978.081	1576.07	1062.84	1650.69	1321.19	969.481	1271.17	810.519	917.862	1062.84	830.567	764.775	1939
ARHGAP17	488.921	400.88	263.125	605.367	668.93	321.165	510.737	521.396	426.5	411.165	802.817	718.848	617.063	584.39	458.424	299.523	315.784	425.976	328.423	615.314	449.151	474.399	273.872	376.562	567.079	507.836	465.993	398.037	484.049	727.985	506.4	465.736	403.447	389.347	411.816	433.291	392.438	532.613	513.714	403.797	345.632	678.05	499.896	657.956	660.727	462.621	613.124	620.728	370.925
ARHGAP19	297.664	412.93	524.91	476.016	386.077	278.561	460.837	470.583	410.937	402.376	328.059	573.418	357.961	549.215	407.055	984.727	698.551	921.861	351.866	496.614	491.714	555.938	632.779	369.807	464.931	376.198	368.391	536.267	849.202	481.279	439.015	350.66	505.733	493.795	398.602	1069.66	291.991	362.358	787.708	562.314	421.462	405.808	424.928	416.109	443.636	420.914	580.378	646.908	745.304
ARHGAP21	471.747	627.613	1202.69	515.883	461.063	350.087	286.15	431.585	377.044	381.856	396.895	215.858	629.992	299.639	436.842	479.065	286.84	363.635	510.599	250.631	378.712	452.454	612.629	415.723	420.353	295.257	395.097	401.292	383.148	292.327	328.189	434.288	465.572	466.016	334.116	215.936	454.833	354.739	248.524	383.003	379.81	213.163	350.238	153.923	322.017	486.604	187.113	183.084	369.199
ARHGAP24	71.1958	43.8799	88.976	47.8186	77.2906	55.5087	40.7795	56.1232	48.6376	39.3081	54.2248	48.3223	69.0896	70.9647	75.1961	106.443	128.084	134.87	59.2225	68.3014	68.0493	87.498	239.738	53.1437	57.7174	46.5825	50.3655	94.8034	84.762	68.1503	38.1383	52.9719	43.6822	66.587	53.8718	148.291	49.6047	60.7016	87.9449	132.406	69.5954	69.0916	45.5361	49.991	55.5713	59.157	53.787	53.8707	204.318
ARHGAP25	962.915	1089.68	1005.38	896.804	943.915	825.016	888.847	936.475	991.622	974.487	1054.54	1059.28	772.338	1053.83	870.048	1195.76	1084.2	1041.3	1027.77	1005.21	1064.27	1115.85	1218.12	1048.6	1017.54	992.547	897.558	871.736	1221.13	872.384	929.471	879.012	887.119	935.564	818.98	1179.28	765.333	985.676	1262.44	977.75	893.423	780.35	1153.21	731.777	784.903	1023.41	1043.22	1044.26	1152.48
ARHGAP26	101.353	55.789	105.12	91.1098	110.743	66.6732	62.3386	118.854	103.546	90.8501	128.404	189.956	60.3679	60.1146	93.2131	144.746	122.859	283.049	51.7733	93.4741	119.188	128.516	191.455	45.8257	104.992	53.0587	55.5231	201.918	334.386	154.184	56.5942	69.2189	193.917	153.062	64.3125	147.094	62.8912	101.81	390.387	110.841	87.8418	179.485	164.6	151.317	179.106	55.2636	232.855	223.822	174.255
ARHGAP27	3890.51	2884.29	3701.61	3045.35	3287.87	1068.91	5086.02	2771.17	2390.52	2134.16	4033.76	3709.1	3615.18	5546.4	3540.37	2320.07	4355.16	2665.53	1604.74	3880.5	2848.98	2693.89	4171.22	2173.14	3580.08	5070.67	2644.16	2988.57	4598.49	5302.1	4657.01	2716.96	3090.07	1555.76	2983.86	5564.32	2006.73	3587.28	4897.01	5804.34	2798.61	4376.25	3932.81	4429.51	5196.71	3485.06	5393.56	5787.76	4033.76
ARHGAP30	1885.34	1783.61	1071.05	1571.26	1635.33	1263	1549.03	1391.14	1237.05	1358.56	1500.54	1741.94	1385.52	1648.6	1822.12	1468.63	2360.27	1467.03	959.159	1598.04	1666.21	1437.21	1022.65	1104.55	1430.36	1752.04	1973.72	1178	1586.42	1631.4	1813.56	1305.31	1648.15	1082.73	1612.91	1679.03	1575.87	1589.27	2347.15	1758.05	1634.26	2111.32	1986.19	1627.68	2378.68	2237.59	2282.49	2167.05	1539.1
ARHGAP4	1885.74	3083.79	655.85	1836.41	1722.97	1501.26	1691.74	1611.65	1737.08	1722.97	696.908	1860.5	2058.11	1303.33	1678.36	1860.5	2058.11	1314.78	1670.94	1838.35	1735.25	1650.69	528.49	1754.3	1872.08	1984.12	2368.8	1649.05	1569.75	1680.24	1800.24	1944.32	1471.05	1786.31	2024.13	1121.44	1352.37	1554.08	1890.41	1777.77	1391.82	1888.19	2560.5	2564.49	2107.91	2330.05	1851.79	1906.09	1180.08
ARHGAP9	4198.77	7321.84	3666.03	5002.84	4939.17	4752.94	2873.5	3270.18	3941.41	4462.03	3949.22	2810.08	4062.62	4577.18	4884.24	8818.72	8429.52	4397.42	6210.52	5227.23	3770.16	4188.97	3739.68	5349.68	3739.68	3854.88	5363.81	4806.41	4924.69	3109.82	4161.43	3629.59	3899.76	4613.25	4728.31	5687.19	4233.01	4161.43	3600.77	5166.68	3899.76	2556.72	5241.46	1966.68	2686.36	6084.23	2379.75	2463.14	5440.46
ARHGDIA	790.597	942.838	200.03	578.498	475.151	1030.04	629.313	726.915	433.724	318.826	627.94	761.614	461.546	459.822	520.824	972.702	793.073	636.572	1271.17	504.798	719.247	623.354	213.015	1179.06	681.044	529.033	951.659	720.247	646.128	600.71	507.202	860.392	590.255	1098.24	650.438	322.405	717.666	661.464	1255.63	496.614	685.538	793.455	908.778	900.859	806.362	859.266	825.062	713.417	619.687
ARHGDIB	26141.6	27438.7	30626.8	22172.2	24118.9	19283.1	23760.5	21909.2	21155.4	20658.4	21909.2	21406.9	22642.3	25098.2	27006.5	33423.2	30626.8	19436.7	26141.6	23194.2	19606.1	21406.9	31664.2	25432.6	20136.5	24118.9	22172.2	28792.2	26141.6	24441.6	26568.4	21406.9	21909.2	20658.4	22908	28337.8	17894.1	21406.9	22380.9	31664.2	22908	20880.5	24741.9	18829.7	24118.9	27438.7	22642.3	23194.2	23471.7
ARHGEF1	302.178	678.302	143.116	360.22	267.413	363.77	450.375	506.748	534.599	415.37	306.658	358.84	327.147	405.088	311.163	346.368	572.689	627.613	298.042	324.929	616.679	492.908	152.618	356.182	300.786	370.097	421.644	677.146	680.602	439.622	363.944	257.667	485.935	375.017	268.72	293.554	269.225	247.574	852.499	271.43	209.594	357.666	817.973	476.526	397.544	392.212	409.663	409.135	266.393
ARHGEF18	2726.14	2463.14	2088.18	2669.88	3056.24	1969.24	2055.45	2669.88	2762	2394.56	1817.78	2512.8	2905.9	2397.88	2492.98	2178.39	1941.48	2508.7	2362	2824.42	2644.16	2798.61	2019.64	2613.98	2833.85	2803.71	2365.62	2293.22	2576.22	2972.96	2819.79	2900.22	2673.75	2500.24	3212.91	2942.43	1771.7	2819.79	1896.93	2190.39	2227.17	2560.5	2863.25	2794.43	2744.42	2205.47	2744.42	2669.88	1879.68
ARHGEF2	4780.86	5440.46	2190.39	4623.67	4623.67	3808.5	4767.02	3800.7	4254.67	4509.62	3349.1	5166.68	3917.18	3770.16	3732.41	4563.52	6189.59	4791.92	3666.03	4752.94	4188.97	4281.64	2636.03	3792.89	4331.3	4100.58	5672.37	3770.16	4540.96	3709.1	3687.4	4301.57	3808.5	4198.77	4522.05	4024.29	3227.22	3520.84	5302.1	4509.62	3762.35	4780.86	5787.76	4989.72	5070.67	5841.16	6390	5986.11	4397.42
ARHGEF3	1867.32	2716.96	1199.64	2153.52	2942.43	2200.05	1513.87	2116.68	2613.98	2428.99	2794.43	2218.22	1867.32	1703.6	1587.72	1729.2	1325.19	2060.65	1919.38	1903.98	2421.98	2333.62	1128.57	2463.14	2119.76	2047.52	2063.84	1663.9	1090.84	1933.93	2058.11	2387.46	1731.12	1735.25	1915.12	1438.46	2231.01	1877.01	1223.75	1284.84	1780.24	1910.5	2657.59	2107.91	2099.42	1919.38	1935.9	1831.64	1232.97
ARHGEF6	1974.15	1964.73	3013.66	2044.83	2905.9	1722.97	2069.18	3276.59	2535.75	2307.17	1984.12	2233.48	2500.24	1986.53	2114.21	1703.6	1493.3	1984.12	1661.85	2699.22	2255.7	1969.24	2180.75	1919.38	2083.01	2344.05	1894.74	2140.69	1602.81	2221.28	2581.1	2173.14	2231.01	1815.74	2150.54	1738.74	1754.3	2218.22	1591.26	1513.87	1784.1	2131.14	2368.8	2677.47	2397.88	2280.13	2088.18	2140.69	1621.62
ARID1A	723.011	772.07	588.351	761.726	598.515	558.834	761.428	704.644	646.535	624.046	619.276	779.13	752.61	814.395	481.739	591.983	869.442	759.905	534.682	755.029	705.59	647.873	711.481	563.428	736.003	874.935	741.909	669.442	813.562	758.749	764.733	799.097	690.893	563.427	731.146	751.371	675.979	723.687	785.202	1010.78	782.543	942.413	834.414	837.719	815.685	717.376	905.074	854.777	811.644
ARID3A	976.067	1136.71	1158.02	831.102	702.445	862.792	962.87	873.045	1016.42	1041.02	908.778	1104.38	799.611	1105.97	911.072	1311.85	1544.74	1738.74	766.346	1406.66	934.479	920.53	1332.55	788.653	949.629	951.035	971.439	1196.64	1601.18	1194.65	830.068	858.748	1136.71	1048.2	1057.98	1434.69	965.892	886.382	1525.38	1551.03	1076.83	1036.8	1032.09	961.204	1088.16	1048.2	1215.95	1271.17	1462.27
ARID3B	601.028	552.45	148.052	370.247	390.601	361.379	338.122	335.224	517.964	465.354	347.619	574.024	341.682	292.221	543.562	603.769	658.113	444.803	430.225	440.619	440.438	369.322	185.403	436.666	457.811	384.795	464.115	347.108	441.092	344.985	383.848	519.048	451.044	445.258	461.31	395.256	593.688	463.226	627.613	409.851	514.894	534.847	507.749	596.003	558.331	560.213	639.466	607.168	612.928
ARID4A	156.657	129.467	232.165	151.715	175.498	136.828	150.502	171.159	214.26	210.076	168.558	91.1711	151.315	135.567	180.118	158.074	169.825	221.035	100.544	189.873	173.341	203.949	304.893	106.886	116.151	155.775	122.076	175.951	223.542	92.86	128.452	114.492	188.752	115.101	137.829	246.657	95.0638	140.337	106.754	214.491	154.905	98.7382	127.437	72.4665	70.0475	121.98	107.24	119.224	190.563
ARID4B	129.727	112.301	212.951	121.72	175.81	110.645	102.516	76.7352	109.598	117.391	176.026	98.8614	148.052	130.34	179.043	69.9316	164.271	102.006	46.0136	160.336	108.319	126.764	291.991	51.0672	117.841	132.461	111.828	71.3054	105.476	113.296	129.727	105.239	96.7492	93.5605	119.486	270.111	111.644	132.416	108.866	155.294	112.963	83.7986	102.458	61.7982	106.349	139.67	73.994	90.4343	179.66
ARID5B	314.096	354.889	225.338	429.235	438.245	611.548	154.34	347.358	394.422	419.584	322.914	267.604	348.316	223.579	318.442	322.791	195.264	354.438	396.235	323.889	280.968	304.312	239.59	382.658	357.666	231.663	275.617	273.967	118.064	327.803	357.529	443	383.989	418.42	296.525	250.822	350.815	252.692	228.654	139.945	262.837	279.723	264.681	338.543	315.267	304.07	248.793	240.078	233.607
ARIH1	130.721	88.2104	196.536	140.583	136.838	142.371	76.9848	117.206	122.859	150.072	204.422	71.7916	105.341	125.903	190.649	170.2	118.431	132.289	115.725	144.118	120.998	132.004	166.735	114.665	151.947	60.3023	92.4038	131.175	142.229	92.0266	83.3546	105.675	132.17	120.752	120.859	171.486	178.636	146.869	103.605	100.652	111.725	89.9745	74.9708	36.5647	87.2487	75.4548	81.8073	76.3338	240.565
ARIH2	531.528	596.661	341.134	570.011	658.502	377.68	450.818	577.283	547.641	573.418	416.501	644.573	530.198	476.984	447.973	485.105	338.397	617.019	402.02	588.639	541.533	542.025	330.578	491.714	610.887	559.899	499.684	465.787	344.711	462.474	467.309	588.002	430.225	436.011	518.781	451.649	595.042	522.159	480.541	436.429	468.877	695.165	569.429	823.52	507.986	534.054	601.326	604.083	468.877
ARL1	166.735	130.877	149.136	153.875	198.288	205.63	96.811	184.4	159.083	188.697	139.122	143.517	165.398	91.3922	117.764	132.665	69.9764	182.2	146.869	164.433	189.286	239.754	122.049	198.36	184.277	111.397	125.203	136.596	134.59	107.512	168.166	207.592	137.61	143.938	170.691	93.0448	137.284	189.227	91.4863	85.3598	147.344	112.049	129.183	136.179	131.969	107.382	128.566	130.507	83.9355
ARL16	110.841	96.4624	89.2466	85.049	89.8267	167.786	74.0692	154.442	107.224	110.422	86.7204	87.3624	112.649	216.332	129.649	123.536	29.7928	45.8746	173.79	39.3688	75.7391	96.074	97.9892	147.233	115.02	159.434	62.3978	124.427	104.992	170.752	166.528	73.6656	73.5263	63.4902	98.1102	105.024	55.6719	113.363	95.1298	104.074	69.3495	106.44	177.766	106.139	93.8942	130.627	92.088	88.3313	33.1487
ARL2	716.854	409.851	1129.49	684.72	466.016	234.395	896.453	528.49	362.661	355.801	753.529	643.125	705.308	819.173	670.454	249.599	528.231	312.953	414.029	477.224	397.922	396.235	561.082	371.542	698.143	1050.65	541.533	451.649	403.277	1112.79	1007.92	662.344	653.281	376.53	655.49	497.078	388.33	634.139	540.968	489.194	634.139	712.607	767.696	853.689	942.133	613.871	732.817	634.479	344.985
ARL2BP	658.827	853.111	652.45	815.424	838.635	871.346	610.887	851.332	690.194	686.834	624.013	683.474	782.771	594.39	739.016	551.213	484.592	636.188	647.736	750.004	927.867	832.629	599.767	698.143	664.621	660.357	858.265	731	577.018	554.377	805.893	716.427	611.886	768.107	635.809	488.707	825.062	676.379	532.941	550.12	625.845	639.466	671.949	780.361	649.705	666.577	608.799	603.769	504.014
ARL4A	99.4625	154.07	101.512	138.636	150.778	84.6645	165.222	105.559	288.094	316.139	119.25	172.898	133.036	106.736	73.0269	55.6725	61.5	392.326	77.5234	205.037	173.074	203.87	183.749	88.058	230.284	105.606	77.2879	245.533	90.545	118.257	83.2864	192.535	164.325	87.9146	164.485	142.222	450.458	119.173	48.1688	121.914	311.415	82.0753	71.2785	154.076	38.8255	63.6007	109.612	105.019	187.393
ARL4C	109.907	143.116	76.6868	121.901	133.666	136.64	55.0209	141.748	110.064	98.6801	109.024	114.107	84.1244	129.8	93.9576	112.224	34.618	103.887	208.971	79.7999	136.966	112.085	78.4943	179.354	111.568	120.238	128.857	100.92	39.577	125.076	184.061	163.895	103.262	86.9366	128.779	112.649	127.863	124.549	39.8324	77.5474	117.062	107.085	142.508	103.092	93.0719	108.356	116.495	105.877	40.6539
ARL5A	938.387	1113.89	1712.71	1047.42	1603.18	1604.07	936.935	1113.32	1150.11	1127.23	1075.76	896.212	1328.4	1065.28	958.511	786.063	827.038	1371.6	1173.54	1295.01	1145.7	1080.78	1266.11	1152.89	1004.41	1143.64	982.096	1065.57	940.758	1033.81	1308.39	921.479	1084.44	656.666	961.102	931.585	792.568	1116.77	533.304	679.82	957.591	1016.11	1149.56	954.385	802.095	1208.75	801.977	825.143	704.169
ARL6IP1	1645.19	1493.3	2131.14	1788.54	1984.12	2231.01	931.109	1349.86	1691.74	1792.75	1554.08	1215.95	1733.14	1205.76	1619.79	1441.44	776.352	1476.98	1571.15	1894.74	1919.38	1923.56	2539.6	1688.14	1272.32	937.036	1256.78	1853.99	1341.93	943.551	1466.33	1682.29	1433.28	1173.74	1715.15	1582.66	3966.94	1517.46	1183.38	1009.6	1452.8	1278.94	1140.44	1363.83	1240.87	1256.78	1251.28	1311.85	1456.17
ARL6IP5	3102.53	2810.08	4209.93	3164.16	3526.79	2572.54	2455.24	3417.27	2947.01	2740.2	3941.41	2261.82	3638.7	2762	3343.01	3090.07	1944.32	2153.52	3139.78	2730.64	3056.24	2669.88	4397.42	3252.45	3520.84	2478.39	2740.2	2942.43	3062.03	2704.03	3164.16	3355.28	3077.9	2344.05	3282.71	2775.29	1719.45	3128.23	1438.46	2255.7	3417.27	2212.25	2261.82	2246.17	2597.38	2492.98	1829.65	1820.46	2336.58
ARL6IP6	753.529	430.225	808.942	628.656	1027.57	651.052	604.083	634.479	791.594	817.432	751.739	442.769	623.027	528.78	813.251	368.084	586.07	545.366	326.644	973.358	621.693	726.537	1026.72	292.327	535.973	677.53	468.877	495.447	431.205	385.903	465.354	616.679	597.664	554.377	554.645	705.308	464.342	672.722	406.343	707.351	580.378	447.574	403.093	394.953	523.515	531.528	437.623	463.432	610.55
ARL8B	600.075	693.296	944.9	547.939	656.559	871.956	502.07	668.354	571.167	538.181	788.653	398.602	649.705	572.062	581.924	771.377	588.931	497.32	851.332	628.347	494.981	620.021	938.309	873.045	521.911	558.62	643.125	858.265	810.519	464.72	654.732	529.615	699.886	533.769	484.592	561.082	458.906	548.89	426.658	517.964	487.322	398.41	553.546	397.069	428.825	608.482	411.312	409.314	644.573
ARMC1	140.627	203.697	185.789	162.589	149.04	250.434	167.468	201.12	155.998	132.372	137.284	106.589	151.504	153.973	120.582	108.866	121.23	173.446	151.178	143.658	156.847	126.728	161.127	146.618	142.086	177.54	188.635	200.03	147	84.4726	149.685	138.801	153.343	90.5024	126.337	97.7384	87.9934	131.598	43.2275	103.727	112.368	100.392	181.949	93.692	91.7737	183.427	84.2077	93.5016	75.9928
ARMC7	181.511	154.135	113.07	157.993	154.387	146.618	190.485	180.305	125.248	145.939	189.903	212.085	125.248	177.711	134.633	215.484	225.957	232.058	158.19	172.51	171.589	165.272	101.871	206.748	158.463	185.665	169.899	159.223	211.047	206.389	169.793	157.993	186.594	219.835	150.211	173.502	124.862	166.853	376.866	180.904	171.225	272.323	191.654	211.74	274.373	171.765	273.529	276.586	203.635
ARMET	1375.24	885.753	1256.78	1362.63	1329	4439.49	1146.97	1253.41	1006.36	1017.25	1602.81	1080.2	1353.7	1649.05	1298.57	1020.39	689.682	845.402	1086.51	1408.02	1258.88	1242.16	1027.57	1101.53	1403.97	1390.39	967.262	918.537	899.015	1266.33	2673.75	1709.5	1019.66	950.271	1310.61	859.796	1240.87	1961.87	990.362	1187.67	1473.93	1218.14	1423.44	1632.34	1378.13	1547.96	1072.79	1165.84	1012.83
ARNT	151.28	57.9938	133.196	76.1578	87.4935	88.4132	129.929	115.096	140.992	106.943	117.317	168.323	113.114	82.9286	123.492	129.8	124.238	152.234	125.117	99.3999	101.641	112.895	149.882	110.032	169.619	115.897	70.2432	61.5216	132.707	123.228	95.3688	134.755	146.276	151.084	94.262	118.814	150.031	157.581	156.95	150.837	162.589	155.018	69.7584	159.223	158.349	62.1734	173.166	179.169	203.352
ARNTL	216.151	211.803	235.583	216.094	246.378	169.507	201.995	181.704	199.178	209.737	235.199	259.789	223.014	221.588	218.542	303.617	312.059	225.714	200.218	292.171	233.62	219.966	297.316	210.882	160.123	196.981	168.374	156.595	240.605	291.719	211.406	223.426	203.863	224.458	273.574	447.985	184.378	238.162	166.689	302.509	251.62	273.365	193.169	226.049	264.34	199.561	292.176	310.411	123.513
ARPC1A	754.95	546.808	690.546	567.063	578.498	494.77	800.856	649.705	599.474	621.693	707.351	676.379	598.924	894.771	723.174	875.966	839.266	601.603	637.941	606.891	631.453	643.125	661.863	685.954	660.357	777.838	671.949	562.572	812.69	769.025	747.612	604.083	609.597	627.613	546.808	792.597	614.616	708.775	933.847	745.816	489.638	892.442	628.656	834.875	930.449	700.33	1012.83	1018.13	806.881
ARPC2	2989.39	2842.44	4213.98	3230.55	3160.9	3258.86	2540.07	2865.08	2857.58	2945.72	3185.46	2851.95	3035.72	3290.42	3299.51	4874.88	3189.2	2932.92	3681.85	3051.37	2883.36	3005.74	3596.97	3723.2	2756.29	2676.59	2787.54	2814.97	3649.99	2748.41	3404.85	2690.6	2647.83	2538.21	2902.89	3136.16	2459.51	3140.05	3128.5	2730.26	2883.18	3112.47	2936.31	2642.18	3112.98	2920.35	3253.18	3316.77	3060.41
ARPC3	5196.71	2158.67	4681.66	3994.4	3571.61	4254.67	5453.95	4577.18	3762.35	3580.08	4657.01	6061.36	4054.9	5672.37	4740.64	5393.56	4806.41	4509.62	5653.01	4054.9	3383.17	3452.13	4408.23	5841.16	3792.89	5041.33	4024.29	4344.26	5599.49	4209.93	3786.27	4150.38	4577.18	3984.36	4331.3	4419.06	2686.36	4989.72	3328.79	5737.73	5256.07	6575.1	2978.16	5334.37	5687.19	3739.68	5906.56	6025.13	4376.25
ARPC4	961.614	805.969	728.137	1333.4	991.112	978.56	1232.08	1275.76	913.613	927.73	1212.5	1405.33	1067.25	969.496	1155.48	1260.68	1170.19	964.966	910.086	1063.48	988.891	1015.19	724.051	815.407	1007.62	1076.38	936.214	950.776	1200.64	1050.96	885.355	1063.02	1208.58	1326.87	1104.07	893.082	1450.4	1107.22	1856.02	1060.37	1054.72	1474.91	1248.68	1516.69	1504.69	1126.88	1360.22	1430.46	900.913
ARPC5	4703.56	3219.32	7811.59	4728.31	3932.81	4161.43	4181	3778.89	3390.02	2593.06	5580.41	2347.41	3832.18	5440.46	5196.71	5272.22	3687.4	2794.43	4634.93	4634.93	3116.46	2463.14	7466.56	4301.57	4291.74	4598.49	3258.25	7212.24	6830.43	3724.97	4884.24	4439.49	4924.69	2734.75	3644.53	4233.01	2459.64	4509.62	2140.69	4540.96	5874.27	1974.15	3013.66	1451.42	2584.98	3520.84	2196.73	2280.13	5016.43
ARPC5L	899.66	850.816	694.028	729.282	806.362	1297.27	884.585	990.362	661.464	754.95	692.041	1066.34	754.95	972.702	705.308	745.304	512.485	768.107	914.582	785.685	959.131	1056.22	681.765	1141.39	765.287	972.702	814.909	670.454	534.054	1202.69	1531.43	927.056	690.194	700.687	844.886	656.216	718.868	846.995	913.928	636.922	692.42	1193.83	964.302	1253.41	1340.79	972.067	938.876	1060.47	446.712
ARRB1	201.973	169.06	157.581	191.894	141.502	143.386	359.286	181.511	167.113	152.907	179.354	261.129	155.075	217.879	196.022	228.104	250.029	140.448	285.375	137.332	152.52	132.931	81.3607	192.679	287.588	238.457	239.223	95.0658	203.124	259.606	167.345	216.404	143.839	239.047	278.065	152.715	204.35	241.675	235.633	215.936	227	196.466	274.978	187.624	191.965	225.872	268.234	285.375	214.525
ARRDC1	215.788	242.039	91.3381	154.768	117.391	218.616	218.392	249.065	262.674	253.087	177.766	245.737	164.383	213.214	155.7	306.523	358.979	335.224	262.674	227.074	282.936	292.327	105.949	245.485	213.502	212.809	241.857	247.671	453.316	183.427	153.537	180.477	256.678	334.386	191.342	140.627	163.239	203.955	489.868	170.955	235.308	215.034	302.053	234.037	230.897	280.005	305.696	353.384	250.092
ARRDC3	141.703	129.476	178.502	123.492	120.582	142.78	296.973	407.905	122.631	114.588	138.942	120.464	114.748	285.375	170.855	311.977	221.202	95.1599	201.599	145.198	124.352	85.7003	362.054	188.304	111.285	220.376	130.16	256.786	413.453	119.372	180.969	98.712	311.547	76.3835	119.342	327.411	90.6684	172.558	114.338	244.256	169.851	103.694	161.935	71.9217	119.231	128.566	105.153	129.687	255.125
ARRDC4	89.3944	58.7709	89.8267	62.1515	157.497	79.9927	78.3448	124.463	41.5598	44.9629	47.1842	132.25	41.7544	92.216	100.584	178.385	75.791	51.8623	70.0007	74.0951	56.7552	51.8497	277.534	67.0704	54.9859	62.317	51.2096	61.3817	215.402	23.7527	49.2447	42.0531	139.99	75.4053	118.225	120.39	38.4656	71.8142	88.0818	44.7462	85.9574	58.8669	57.9584	40.2816	91.8628	35.8417	57.3032	62.2611	84.1539
ARS2	81.5748	129.054	33.6808	39.8875	38.0845	170.507	58.5158	87.391	55.3059	70.1625	58.5489	54.609	48.9934	66.9805	42.0555	108.817	102.897	60.5356	107.958	44.685	99.0625	102.233	39.8949	99.3877	42.7656	68.9349	134.383	69.6641	97.3905	43.2576	111.192	35.9246	60.4238	80.3637	54.7662	32.4802	39.5165	45.2647	110.502	39.4085	33.8653	77.9316	145.6	85.4905	87.6882	96.1082	77.5216	65.3471	40.2393
ARSA	133.743	112.115	30.0788	55.1596	50.3127	161.283	144.023	198.494	157.993	150.988	181.398	122.631	45.4615	158.349	78.7682	144.023	192.634	195.06	152.715	107.805	135.924	140.489	41.4948	96.043	113.777	116.601	108.526	75.8927	208.505	140.172	108.282	103.946	100.786	242.603	54.1427	97.3031	180.646	94.0832	257.563	116.017	123.612	104.504	128.077	164.383	187.744	124.776	231.148	233.109	120.002
ASAH1	93.6301	41.5798	123.191	59.4373	79.7207	87.1681	85.4993	51.6643	127.84	138.082	82.4003	85.1636	71.5362	70.7216	115.475	38.325	101.693	122.175	39.7099	61.7052	115.667	122.351	119.401	33.1343	126.367	122.878	51.6692	51.6481	96.4354	77.7412	57.6648	95.917	75.2137	96.4309	73.5246	173.754	85.6237	136.464	117.903	202.265	139.149	84.0486	43.6683	77.3907	80.8768	56.1822	87.0327	102.389	182.532
ASAHL	332.718	394.422	401.652	704.512	761.127	651.383	361.379	496.123	493.59	519.048	400.256	441.751	605.708	487.322	499.165	327.556	652.45	627.94	545.673	318.681	502.808	503.012	293.554	337.048	472.201	517.718	405.988	433.724	545.084	623.027	388.14	548.2	305.696	711.464	568.206	282.936	515.124	582.234	372.486	201.852	786.723	373.442	352.609	625.178	434.707	497.545	371.719	373.106	621.693
ASB1	315.01	169.501	169.234	282.293	305.439	188.181	189.414	264.88	239.223	292.667	174.255	242.8	290.961	283.049	220.464	234.326	159.584	347.619	194.66	281.412	244.615	252.907	205.775	302.758	226.727	285.273	215.788	273.727	148.431	208.655	246.512	316.577	246.014	243.217	276.982	181.031	171.89	201.196	216.404	280.237	205.195	235.22	236.172	374.055	288.608	229.293	257.842	261.817	264.581
ASB8	469.126	165.222	502.07	293.45	351.26	254.584	299.41	358.695	369.043	367.249	379.359	390.025	297.569	274.978	378.195	478.401	248.021	330.578	317.826	425.251	366.677	385.749	447.365	403.819	388.525	309.182	203.825	327.675	333.27	279.636	208.296	347.752	347.87	412.002	380.093	346.065	388.883	425.092	309.055	220.464	490.087	295.69	209.52	279.082	348.316	185.978	350.238	360.064	496.86
ASCC1	241.179	125.903	254.922	189.69	315.267	219.1	166.735	262.226	211.329	237.847	238.859	254.831	222.582	188.697	211.875	238.013	140.448	232.14	238.71	206.82	230.366	259.332	276.022	274.662	245.396	227.461	170.151	221.438	227	266.29	220.758	276.789	205.054	216.696	240.476	202.329	211.805	245.485	188.762	217.957	242.288	246.614	188.697	217.55	200.697	150.388	225.798	265.739	238.268
ASCC2	5804.34	10552	6857.43	9828.77	12910.9	2931.84	10666.7	6711.61	10122.3	10173.9	6294.06	14615.7	10173.9	5334.37	7050.63	4644.89	4740.64	9978.13	5771.97	9978.13	5471.53	5227.23	6689.85	7687.31	11340.4	10031.6	10915.9	6529.99	5546.4	12985.2	5720.41	10173.9	6459.9	8950.71	10666.7	9872.88	15611	11276.4	5118.26	17894.1	10230.8	9978.13	7721.78	10499.2	6025.13	6783.14	10283.8	9569.92	10786.8
ASCL2	380.716	429.44	584.534	322.52	531.241	191.654	498.914	416.308	297.664	295.257	1153.05	445.018	606.304	691.617	316.067	302.648	426.466	246.512	411.651	420.914	424.184	357.666	486.832	664.621	455.067	431.585	463.226	303.98	464.342	643.529	565.259	617.019	365.337	415.151	607.168	408.069	775.853	614.251	453.114	461.546	501.594	432.882	733.249	587.341	457.235	650.438	642.305	597.664	395.601
ASF1A	311.771	309.055	321.23	300.012	273.24	289.467	215.256	332.244	246.614	278.481	213.163	163.805	431.02	177.189	223.195	226.502	139.122	185.273	254.487	252.202	311.449	255.935	365.001	275.293	252.016	222.966	240.476	285.59	142.739	139.712	257.748	301.209	213.282	235.887	292.451	153.393	271.825	319.476	94.9203	158.876	197.571	210.192	243.888	206.602	184.772	224.943	128.779	134.086	138.196
ASF1B	143.758	104.211	36.1016	100.951	34.7711	65.4829	147.29	99.8221	98.6521	103.225	50.2208	173.166	93.4468	142.086	116.989	233.028	121.379	137.425	126.996	112.301	151.456	153.288	46.377	112.539	118.895	137.381	155.347	137.182	269.643	75.0669	63.8304	123.612	113.617	134.506	117.13	136.514	73.5743	127.73	123.828	140.039	144.023	167.677	149.6	108.319	119.778	140.627	220.308	220.918	154.867
ASGR1	1025.88	485.105	653.681	717.277	613.871	425.092	1264.97	788.653	497.32	507.466	931.764	975.375	830.567	1250.36	1180.08	570.614	1253.41	431.205	747.212	613.576	633.517	558.97	547.071	534.054	762.449	452.084	676.379	634.802	1218.14	1321.19	864.028	631.453	1018.94	897.081	671.949	504.297	435.842	925.749	1282.55	644.988	803.362	1005.09	668.354	1055.52	1134.94	812.69	673.935	693.668	705.682
ASGR2	98.3906	55.1158	35.349	72.1317	37.0733	63.9057	90.0882	53.3134	22.0019	22.9384	73.2695	73.544	92.8291	60.8921	76.0466	35.2273	267.213	39.6343	114.034	27.2053	39.6462	36.7528	36.7051	67.8556	75.393	96.0826	71.1235	91.9403	122.701	92.465	32.7349	97.3187	106.079	143.905	48.4441	21.5089	56.609	40.7417	290.68	57.7914	65.3562	76.7869	55.344	171.305	81.5679	49.9282	117.035	101.86	81.9339
ASH2L	738.1	871.956	790.121	901.463	1045.85	650.12	716.427	683.474	839.266	830.567	967.262	940.821	940.821	690.546	884.585	789.217	995.069	648.13	667.621	797.655	792.128	812.69	666.227	688.901	1002.02	639.131	961.204	926.394	687.254	809.956	714.261	822.915	816.474	791.594	940.286	814.366	1433.28	867.225	897.706	879.803	847.57	841.05	832.629	820.166	955.734	845.964	901.463	921.218	1044.31
ASNS	438.633	262.674	195.623	292.768	384.795	377.836	263.645	208.448	221.135	248.624	280.652	242.603	359.764	280.652	229.675	228.5	221.965	182.014	312.102	293.122	219.318	198.494	219.618	286.034	365.815	333.692	290.302	213.09	114.748	309.182	322.791	348.189	223.497	202.667	258.429	300.448	182.975	376.341	225.634	235.553	253.349	412.569	293.346	387.414	296.059	276.377	197.966	185.077	170.589
ASNSD1	588.002	569.429	647.346	675.188	744.863	643.87	417.573	630.728	867.225	851.894	614.251	783.269	651.052	622.659	561.701	431.777	703.271	676.379	547.071	585.167	648.13	744.443	686.834	756.405	625.845	636.188	447.973	739.016	480.284	331.568	613.576	787.708	727.637	610.55	713.095	925.749	613.871	817.432	282.722	772.931	564.358	772.42	516.415	637.941	540.422	632.484	375.181	386.232	919.863
ASPHD2	87.5406	117.094	76.1578	116.085	125.903	127.106	78.742	96.6517	147.865	151.546	421.265	88.9148	92.3746	93.3862	100.693	103.121	112.332	132.544	101.775	100.884	115.795	104.437	41.006	94.3821	190.53	66.5266	99.2723	95.9578	140.767	80.0157	54.2505	135.816	84.7867	125.98	93.2963	58.9453	138.671	129.727	123.865	28.1449	87.3077	180.786	119.547	99.9791	105.239	123.612	86.695	72.4671	152.329
ASPSCR1	277.13	333.103	164.243	232.622	245.905	200.288	404.294	234.352	220.758	208.071	225.48	253.94	280.053	307.138	216.113	157.101	255.267	159.079	195.522	227.823	230.284	224.312	157.218	156.087	266.915	371.175	318.331	200.905	188.118	496.129	434.68	233.025	230.781	179.962	245.399	238.526	185.016	269.579	230.031	264.657	188.228	269.738	422.392	392.998	310.541	345.702	270.666	271.776	123.44
ASXL1	187.563	183.084	165.059	204.083	220.99	118.673	169.4	192.634	147.96	177.137	135.555	223.906	196.992	167.627	178.213	139.269	127.766	167.23	154.916	195.453	161.39	170.642	145.512	147.865	195.453	158.041	133.499	149.829	109.317	223.579	225.253	195.338	172.374	202.265	180.138	159.376	177.36	183.3	251.722	143.617	178.99	228.897	162.868	282.411	211.404	130.553	218.392	212.02	140.671
ASXL2	870.831	1044.99	728.139	1058.87	993.676	756.405	659.168	966.496	946.917	937.601	794.086	652.45	881.378	707.865	740.544	463.432	903.906	1373.67	599.767	1090.84	1035.93	1018.13	731.959	706.497	879.803	490.317	707.865	1188.76	1066.34	539.835	684.72	770.44	974.684	662.344	973.358	626.246	567.356	887.483	441.952	953.695	806.362	708.29	794.524	687.678	611.22	768.107	721.127	781.26	1014.96
ATAD1	162.232	218.552	276.124	162.696	201.12	293.45	147.136	205.054	200.697	209.964	184.589	136.312	202.803	121.379	136.267	155.797	117.13	145.198	167.072	164.7	186.481	206.099	276.124	185.726	149.04	186.097	163.755	178.385	131.808	114.919	173.446	168.592	174.811	155.751	183.778	157.497	152.864	179.296	86.8221	136.738	132.004	142.172	154.53	116.307	110.963	173.109	116.757	115.897	135.365
ATBF1	99.2112	180.207	50.0869	88.5902	70.2642	114.338	49.3218	82.2211	76.2856	87.6471	60.9661	75.4807	81.4115	45.616	84.181	109.57	146.528	136.514	137.182	73.5263	137.704	156.788	44.1847	79.9712	97.1382	48.0309	158.571	110.841	141.267	50.3127	39.4136	69.5026	85.4788	153.923	102.947	31.7062	99.1237	54.0883	88.7819	46.8452	78.267	65.8739	154.184	58.8056	63.748	138.282	105.21	95.2491	75.1557
ATF3	9.0627	7.02026	17.6304	18.5603	16.8539	7.8191	16.0658	13.9603	26.216	25.7218	373.295	16.1471	10.1292	29.1398	8.81903	11.1699	5.37988	16.0029	12.8682	4.21662	5.73485	10.4673	6.41467	12.5401	60.7839	11.5626	23.0248	11.3122	28.9279	18.3371	6.84583	15.4123	13.6152	13.2579	19.8118	12.9731	21.7092	16.7512	29.6422	0.144597	17.2874	46.4619	18.0508	7.85763	16.5917	13.8879	13.8313	15.111	30.4446
ATF4	2064.63	2290.57	3300.67	1629.97	1993.86	3278.19	1908.51	2090.94	1668.21	1262.55	1721.78	1176.28	2247.38	2282.88	2087.38	2051.95	1498.9	1691.01	3273.02	1747.56	1506.02	1694.22	2366.51	2485.63	1882.51	2162.32	1839	2536.05	2162.98	2151.12	3424.36	1919.96	2387.59	1857.54	1872.6	1678.31	1390.79	2060.53	1326.62	1890.08	1752.34	1065.18	1838.06	1130.02	1134.96	2504.8	952.741	1099.49	1759.23
ATF5	202.483	123.907	172.281	212.366	172.51	215.627	277.439	161.683	136.224	190.217	384.141	223.341	216.63	299.521	147.094	128.404	139.073	156.102	194.392	211.047	136.049	152.572	129.649	187.493	226.574	244.688	211.128	107.805	182.495	243.217	235.993	195.696	123.023	221.588	203.059	144.253	240.647	216.404	181.16	164.484	233.109	217.05	160.29	223.748	169.738	222.582	194.526	204.772	194.66
ATF6	567.063	644.573	557.387	512.73	468.252	685.954	840.41	618.554	391.11	463.432	725.301	594.051	423.974	696.908	508.262	876.528	1202.69	492.908	563.726	430.432	442.363	527.707	889.336	604.417	455.906	850.357	588.002	525.216	707.865	774.297	624.323	398.972	547.352	480.053	424.52	1033.64	347.87	567.679	838.049	1582.66	504.587	732.412	581.287	419.584	602.408	539.835	751.739	787.708	718.51
ATG10	133.373	152.029	118.064	139.317	126.38	156.584	96.9778	207.592	167.4	147.233	161.233	104.669	131.424	166.791	133.06	224.467	216.271	317.189	217.879	143.57	216.019	192.139	155.596	200.563	170.904	149.415	191.894	333.43	325.322	129.356	169.619	126.061	249.599	117.168	158.622	151.178	100.198	146.226	155.347	200.101	138.632	109.024	193.585	160.185	114.372	207.731	113.467	141.748	216.77
ATG16L2	1060.47	1123.43	434.707	671.614	762.059	429.021	1462.27	905.203	1074.48	894.771	886.913	1568.32	655.168	1656.52	1010.5	1721.12	1674.62	1547.96	864.028	1015.6	1163.81	881.852	794.524	1161.09	1249.18	1163.81	856.536	1070.37	1851.79	1654.65	876.528	744.863	1075.27	910.552	933.166	2246.17	782.771	1001.33	2926.47	1230.82	796.595	1731.12	1394.38	1343.27	1719.45	993.162	2080.01	2060.65	1686.24
ATG3	1531.43	1921.38	1966.68	1484.22	1652.41	1611.65	1862.49	1122.52	1660.32	1442.97	2993.66	1851.79	1254.47	1678.36	1709.5	1707.76	2066.65	1141.39	1564.71	1450.26	1464.99	1239.61	1798.22	1441.44	1705.67	1478.33	1979.77	1311.85	1574.53	1584.37	1294.73	1362.63	1386.12	1903.98	1591.26	1896.93	1804.54	1954.54	2173.14	1699.47	1844.98	2320.07	1485.78	1415.16	1722.97	1800.24	1619.79	1591.26	2119.76
ATG4C	202.329	170.589	217.187	201.599	270.213	370.247	162.232	196.794	170.314	189.286	154.768	206.037	285.375	175.972	232.77	129.558	183.3	141.087	158.091	220.99	186.771	206.669	226.183	177.424	154.49	175.232	182.668	147.186	148.326	167.729	231.744	188.051	176.843	175.701	179.915	156.788	110.811	237.592	124.512	112.368	169.234	193.128	179.354	166.957	149.136	185.214	142.654	149.6	126.45
ATG7	525.998	471.747	900.859	371.408	502.07	243.55	767.183	522.487	339.25	359.616	550.902	687.254	479.328	639.131	539.835	651.737	794.524	381.193	385.55	452.671	315.151	317.078	830.567	417.573	468.457	665.451	486.604	485.105	599.767	829.498	624.686	431.205	517.447	501.11	570.011	886.913	355.664	536.267	1115.7	773.885	488.467	720.754	450.818	618.554	763.822	528.49	822.915	770.44	537.088
ATG9A	125.248	224.943	111.251	145.06	129.222	111.531	142.83	168.632	144.746	140.216	89.567	206.312	128.819	111.794	145.418	247.415	173.502	178.882	210.631	128.936	123.575	98.0228	123.612	234.543	134.8	118.709	149.462	222.899	181.511	168.7	113.951	157.192	181.459	228.737	152.956	157.441	270.716	120.464	284.226	147	138.541	150.439	154.579	239.916	176.55	112.895	176.251	176.55	206.389
ATHL1	1032.09	1016.42	634.479	879.108	550.673	609.597	901.463	689.263	664.621	627.94	633.147	704.957	658.502	1148.95	493.142	1391.82	1701.32	819.173	1155.07	670.146	993.676	925.749	962.129	1476.98	731	1256.78	831.573	1187.67	822.915	1221.4	871.346	792.597	1127.52	777.838	931.764	817.973	537.335	335.515	2657.59	1070.37	924.366	1460.61	1298.57	1230.82	1116.77	938.876	862.792	906.95	1409.48
ATIC	608.482	955.734	510.599	750.004	726.537	813.251	424.928	604.417	484.84	583.946	593.688	587.658	612.235	523.017	422.786	557.057	348.437	514.111	637.287	686.399	762.449	687.678	368.391	822.915	520.824	585.502	815.424	449.953	254.226	577.599	809.956	619.687	520.824	529.91	498.435	401.117	544.539	522.487	403.653	410.428	430.639	606.304	883.274	688.901	567.679	881.378	567.356	558.016	262.837
ATM	144.298	273.586	199.247	160.479	180.348	431.753	112.079	280.969	194.417	149.488	94.198	83.4512	187.241	169.11	152.442	290.519	132.775	217.033	278.414	181.221	173.927	177.73	187.638	317.614	141.688	167.92	225.111	310.377	218.444	97.0267	183.371	161.056	259.467	138.712	191.027	153.25	134.97	160.098	46.5168	113.009	152.569	85.1544	233.101	63.0073	62.0806	219.419	59.3014	66.7934	135.99
ATOX1	561.082	247.574	611.22	388.699	260.354	331.972	873.045	477.64	392.92	431.02	834.318	718.51	461.063	666.227	618.554	515.883	591.831	362.82	462.973	387.043	427.658	398.41	414.428	469.584	607.168	752.503	527.416	447.739	626.246	692.858	639.831	515.124	511.944	509.554	522.159	460.608	451.649	530.475	690.86	517.447	611.548	690.546	671.185	711.879	807.799	605.069	806.362	799.611	538.465
ATP11B	195.949	147.595	312.225	180.477	247.671	164.484	149.786	175.232	212.366	204.635	215.627	165.005	154.288	170.492	161.935	259.232	281.608	216.978	146.766	260.261	207.516	168.487	422.602	171.02	193.917	151.741	109.241	231.06	164.047	172.846	194.871	156.641	205.416	148.852	215.484	340.273	130.243	161.493	304.07	340.7	190.275	143.116	133.743	131.734	163.539	127.521	162.083	150.606	312.953
ATP13A1	264.88	408.242	86.1017	263.425	268.907	477.426	261.396	225.253	274.978	279.198	221.887	315.151	199.593	214.177	185.132	256.295	312.861	241.95	334.946	220.608	229.868	244.439	78.4167	297.792	292.667	301.698	354.739	213.941	197.06	243.619	248.355	247.491	175.467	285.375	291.639	133.666	293.787	230.2	341.682	204.984	227.54	313.23	393.793	322.017	291.991	423.587	280.34	268.529	203.497
ATP1A1	310.271	326.843	273.124	365.886	266.057	390.936	413.866	379.051	364.002	335.882	324.239	354.905	294.542	388.186	323.482	253.004	262.78	326.475	370.471	328.667	386.77	330.41	204.286	312.749	350.381	351.297	319.058	362.794	370.818	352.773	480.769	323.163	385.414	401.665	299.831	251.596	256.759	286.507	385.376	207.05	288.819	410.624	370.819	402.464	344.932	269.723	317.411	330.712	237.442
ATP1B3	162.146	252.24	320.206	175.832	241.58	421.15	283.285	252.444	202.561	174.54	389.196	136.142	196.007	322.921	189.528	231.886	204.777	163.221	327.517	158.205	198.339	204.871	290.378	264.984	231.075	220.151	235.157	251.782	325.147	248.883	317.211	216.07	243.654	211.441	205.275	188.99	152.053	245.613	124.333	182.812	238.559	168.254	233.9	141.058	135.267	254.857	138.296	134.138	227.931
ATP2B4	357.56	356.269	253.273	417.005	464.605	295.406	307.599	396.12	313.862	380.492	293.682	427.886	326.039	347.594	364.496	307.846	487.878	524.04	206.616	410.311	490.824	537.783	489.559	208.365	269.07	257.64	235.392	342.702	298.953	458.982	421.651	276.322	353.634	317.858	292.11	484.003	340.004	247.611	632.577	561.445	328.185	425.941	389.521	521.816	442.58	215.43	458.842	420.438	349.725
ATP5A1	4005.62	4791.92	4703.56	4450.6	5317.41	6625.08	4110.89	3824.37	3854.88	3899.76	3778.89	4691.46	4273.9	4831.45	3880.5	2552.65	2957.22	3207.77	3644.53	3755.13	4717.03	4951.22	3593.45	3282.71	3845.93	4397.42	4522.05	3437.45	3452.13	4644.89	7532.98	3808.5	3029.89	3540.37	3621.68	3282.71	2910.97	4419.06	3437.45	3090.07	3410.72	4752.94	4780.86	5804.34	4939.17	4598.49	4623.67	4791.92	2137.27
ATP5B	6390	8360.47	6760.51	8910.79	9622.84	8023.43	7843.77	8360.47	8910.79	9417.09	8217.25	8124.29	7163.16	7410.55	7238.77	6231.41	6938.56	7381.82	6965.92	7466.56	7990.94	8698.6	5704.39	7658.65	7297.95	6804.95	7954.86	8950.71	7914.15	8324.22	9258.7	7381.82	7721.78	7050.63	7567.94	6760.51	11532.9	7381.82	7238.77	7135.6	6151.17	8779.14	8429.52	9777.65	8506.43	8661.95	8254.72	8734.98	5302.1
ATP5C1	1872.08	1944.32	1738.74	1737.08	2094.02	3176.11	1585.87	1944.32	1557.45	1691.74	2276.93	1894.74	2293.22	2175.92	2071.64	1395.65	1804.54	1299.72	1847.22	1849.69	1864.93	1847.22	1420.77	2017.34	1954.54	1598.17	2218.22	1596.18	1652.41	1557.45	2677.47	2029.31	1518.76	1559.39	1741.11	1325.19	1373.67	2085.47	1043.54	1327.78	1949.72	1727.04	2058.11	1737.08	1782.23	2252.66	1491.52	1476.98	1307.05
ATP5D	388.986	457.355	132.953	383.515	220.672	648.841	510.015	463.276	396.931	394.196	415.938	566.309	368.385	352.761	324.654	401.98	371.425	404.334	570.665	327.167	640.198	587.782	108.937	501.33	395.98	482.01	492.723	366.25	386.152	322.928	445.711	476.518	333.376	752.845	359.346	198.917	498.644	350.585	619.347	319.243	434.068	542.219	484.196	688.836	578.9	441.27	596.167	595.884	275.518
ATP5E	15611	11604.3	19606.1	17417.6	11532.9	13640.6	18676.4	16104.2	19436.7	19606.1	18398.5	22172.2	19125	12295	17655.8	15611	16517.4	19951.4	14354.5	16831.3	16201.1	16936.2	19606.1	20880.5	18676.4	15611	17655.8	18026	17178.4	17272.6	13733.6	18829.7	19796	17773	19436.7	19436.7	27006.5	16831.3	16295.5	16517.4	22380.9	18139.1	13640.6	19436.7	18026	13323.8	21621.1	20461.3	19283.1
ATP5F1	1317.84	1189.23	1509.39	1528.15	1762.96	1854.96	1026.71	1313.85	1223.21	1251.54	1672.23	1242.78	1610.5	1313.87	1423.12	999.005	1063.34	1113.62	1437.04	1478.55	1345.52	1417.21	1287.07	1399.34	1370.16	1307.99	1250.99	1123.78	1216.88	1120.12	1574.16	1437.53	1197.28	1225.7	1201.63	943.192	1033.83	1655.6	935.56	941.011	1502.79	1361.28	1196.32	1393.29	1352.92	1331.44	1193.16	1155.97	820.258
ATP5G1	223.296	181.462	271.942	196.48	120.607	253.423	320.374	223.733	201.068	204.421	241.173	298.553	201.558	247.32	181.884	138.382	187.297	145.943	178.122	183.567	224.756	218.229	219.916	208.166	212.138	331.3	295.094	153.402	167.648	341.544	425.064	207.839	166.051	185.528	170.999	153.7	123.856	220.046	219.279	149.396	194.924	331.127	317.851	431.104	339.202	305.568	319.73	272.799	126.873
ATP5G2	2483.45	1894.42	888.704	2323.37	1580.7	2041.48	2208.44	2572.73	1858.97	2124.38	1909.92	2402.45	2380.36	1992.83	2035.25	1598.06	1845.15	1636.98	1931.34	2237.31	2054.39	2308.16	713.679	1815.3	2315.92	2220.57	2288.16	1827.11	2122.66	1738.12	2137.03	2344.13	2077.23	2134.47	2124.37	909.265	1574.76	2134	2105.91	1387.2	1930.82	2713.11	2500.33	2956.04	2664.03	2259.28	2971.66	2589.42	1301.48
ATP5H	1998.71	1786.02	2214.14	1967.66	1664.14	3902.99	1820.43	2597.29	2083.29	2142.68	2147.8	1872.4	2174.2	1954.24	2231.96	2279.9	2045.5	1711.9	3052.88	2167.52	2201.63	2593.4	1658.9	2674.97	2048.41	1989.34	2706.17	2147.98	2038.11	1735.77	2606.75	2214.86	2224.41	2235.83	1910.39	1169.27	1652.8	2111.22	1485.81	1489.81	1869.97	2007.85	2386.54	2009.89	2122.64	2374.67	1839.42	1849.23	1374.43
ATP5I	1175.79	533.137	1356.52	1114.48	417.856	1254.11	1193.68	1076.87	1022.48	1091.46	1012.99	1036.55	1252.19	1275.2	1151.19	918.938	1080.52	898.295	1431.16	1091.94	1227.93	1281.19	1163.1	1139.07	1085.95	1311.14	1385.39	1006.05	982.995	1129.01	1347.68	1172.84	904.818	1126.8	1205.82	675.933	970.065	871.47	935.055	896.044	1268.2	1062.41	1244.07	1284.63	1491.04	1348.9	1203.23	1296.76	836.227
ATP5J	643.922	408.853	1003.41	697.536	497.41	1329.65	741.294	831.84	590.303	581.515	796.561	926.354	748.858	727.608	944.452	692.506	807.779	572.862	850.093	727.125	747.585	767.296	804.584	944.794	659.564	768.752	950.803	636.661	639.821	624.519	1147.48	660.292	754.23	640.719	673.154	579.77	689.757	577.721	723.916	659.044	845.266	981.686	753.073	828.367	1111.71	834.223	929.503	903.955	459.385
ATP5J2	978.755	1321.19	639.831	1201.83	642.736	1713.4	1130.29	1099.02	1158.02	987.631	1134.94	1025.88	1292.16	969.481	1194.65	1460.61	1806.78	1113.86	1561.1	1113.86	1102.44	1102.44	541.233	1386.12	799.611	999.737	2085.47	1331.16	1135.75	759.899	787.24	1305.87	1009.6	1307.05	1163.81	641.967	1836.41	874.362	986.172	1094.27	1205.76	874.854	1554.08	948.397	969.481	2242.91	957.229	969.481	939.543
ATP5L	3459.19	2657.59	3908.69	4233.01	2572.54	4385.86	5408.21	3957.19	3800.7	3709.1	3376.55	5086.02	4140.52	3709.1	4439.49	2631.34	3975.6	2828.52	3116.46	3899.76	3845.93	3666.03	3314.37	3219.32	3864.03	3984.36	3839.09	2905.9	2819.79	4964.18	4563.52	3845.93	4120.54	3701.61	3437.45	3571.61	5272.22	3383.17	4014.95	2988.57	3908.69	5888.89	4131.46	6888.34	6830.43	3755.13	6103.57	6342.22	2780.14
ATP5O	4024.29	3925.14	3854.88	4791.92	4131.46	5288.69	4450.6	4540.96	4071.22	4161.43	4806.41	3732.41	5118.26	4223.35	4540.96	3181.85	3294.33	3504.16	4681.66	4728.31	4264.25	4884.24	3459.19	4644.89	4365	4806.41	5149.73	3563.34	3390.02	4924.69	5041.33	4831.45	3526.79	4419.06	4243.66	2988.57	2824.42	4188.97	2572.54	3349.1	4005.62	3941.41	4681.66	4331.3	4161.43	5103.71	3908.69	3908.69	2397.88
ATP5S	128.337	126.517	218.046	155.12	157.076	220.406	172.371	209.666	189.546	196.637	145.543	275.547	174.285	113.803	138.526	97.2632	80.2689	165.249	160.323	159.522	151.679	188.939	232.816	170.285	177.673	128.096	134.612	197.418	134.563	210.582	137.853	137.917	187.667	135.044	171.149	206.917	240.481	120.185	63.0068	146.765	155.287	124.853	139.312	109.855	116.485	144.137	132.207	150.869	88.5406
ATP6AP1	3755.13	2347.41	4634.93	3638.7	2648.43	2486.87	4752.94	3580.08	2753.32	2878.79	3282.71	4024.29	3644.53	4964.18	3607.69	3732.41	3479.76	3410.72	3390.02	3615.18	2686.36	2894.19	5118.26	2889.43	3417.27	4310.49	3176.11	3212.91	3709.1	4462.03	4110.89	3485.06	3555.27	3555.27	4080.38	3629.59	2486.87	3485.06	5334.37	4233.01	3369.15	4472.42	3465.92	4450.6	4331.3	3899.76	4681.66	5507.83	4634.93
ATP6AP2	2762	2264.59	3335.75	2523.94	2539.6	3252.45	1947.19	3390.02	3430.5	3880.5	3151.61	2404.15	2878.79	1877.01	2682.59	3219.32	2231.01	2523.94	2428.99	2798.61	2673.75	3003.65	3029.89	2798.61	2516.63	1836.41	2252.66	3201.38	3540.37	1434.69	1756.34	2560.5	2848.98	2606.12	2833.85	2183.75	2330.05	2894.19	1580.9	1727.04	2721.51	2372.72	2055.45	1894.74	1804.54	2080.01	2183.75	2200.05	3109.82
ATP6V0A1	1036.8	1187.67	1650.69	816.925	696.402	756.925	1439.86	985.426	738.1	746.245	835.411	1125.74	911.072	1484.22	995.069	1275.4	1212.4	861.683	722.308	983.21	628.347	684.354	1307.05	734.065	848.128	1148.95	1062.84	967.927	1416.59	1294.73	1222.57	791.059	1255.63	888.272	1018.94	1143.22	784.727	933.847	1262.7	1448.8	699.479	1019.66	1248.14	849.73	1071.1	1283.6	1263.73	1395.65	1131.24
ATP6V0B	4429.51	3452.13	1954.54	3276.59	2639.73	2863.25	3808.5	3013.66	3252.45	2957.22	3018.5	4989.72	3181.85	3029.89	3832.18	5349.68	4717.03	3600.77	4429.51	3096.28	3349.1	3024.14	2307.17	3941.41	3512.19	3587.28	3151.61	2622.7	4355.16	3181.85	2436.86	4161.43	3485.06	5196.71	3908.69	3512.19	3158.25	3504.16	6294.06	3899.76	4198.77	4767.02	3724.97	3747.39	4243.66	3770.16	5016.43	5182.07	4644.89
ATP6V0C	3856.35	4590.6	5459.48	5974.26	5797.07	3246.74	6550.82	4104.42	6006.98	5903.76	3173.21	5615.71	4268.01	4156.24	5454.43	3505.78	3659.16	7331.89	4861.14	4539.39	4679.07	4282.84	6905.08	4107.24	6133.81	4446.61	4165.4	4351.58	4774.01	4936.85	1934.83	5624.27	5341.38	5041.39	5027.16	5625.83	8103.63	4906.32	5498.12	6724.97	4819.85	4109.34	4189.26	5547.62	3103.71	3846.37	5399.85	5735.85	6569.36
ATP6V0D1	2276.93	1365.36	1024.36	1767.63	1815.74	1260.28	2283.43	1416.59	1378.13	1412.36	2114.21	2202.81	1602.81	1614.75	1984.12	2280.13	2404.15	1359.77	1790.73	1754.3	1549.73	1528.33	1169.58	1780.24	1532.66	1652.41	1585.87	1737.08	2215.63	2183.75	1504.34	1688.14	1613.14	2712.73	1782.23	2264.59	1613.14	2019.64	4450.6	2274.04	2077.5	2771.17	1611.65	2249.25	2572.54	1856.21	2873.5	2910.97	2009.27
ATP6V0E1	1006.36	1494.62	1864.93	1123.43	1014.3	1379.73	1473.93	1090.02	972.702	949.044	1561.1	1336.53	1213.66	1804.54	1313.31	1274.43	1860.5	770.937	1582.66	1099.89	1073.71	1000.61	1829.65	1546.17	889.959	1403.97	1498.04	850.357	1007.92	1398.22	1382.29	1036.8	1102.44	951.035	1123.43	1858.39	1201.83	1028.41	1485.78	2069.18	1248.14	1509.27	1375.24	951.035	1237.61	1555.76	1253.41	1289.62	1155.07
ATP6V0E2	957.86	793.073	767.696	843.789	1172.69	776.352	485.105	880.833	650.438	606.304	709.189	483.137	902.089	453.316	599.474	548.539	311.29	448.974	710.029	802.866	1007.12	1048.2	489.194	671.614	691.617	827.795	818.517	444.044	201.852	705.682	785.177	980.234	680.136	537.846	776.815	435.043	552.705	940.821	423.383	448.123	676.034	540.422	637.287	637.287	700.687	648.13	508.723	417.016	245.659
ATP6V1A	2463.14	1908.11	3966.94	2539.6	2233.48	2114.21	2074.88	2390.52	2114.21	1966.68	2190.39	2165.04	2379.75	2504.75	2470.68	4161.43	2167.89	2500.24	2447.84	2682.59	2397.88	2677.47	4531.02	2734.75	2134.16	1879.68	1810.86	1923.56	3270.18	1518.76	1663.9	2293.22	2523.94	2350.63	2397.88	3219.32	1608.12	2390.52	1775.98	2183.75	2236.86	2099.42	1674.62	1589.39	1939	1923.56	2397.88	2451.39	2978.16
ATP6V1B2	7135.6	8429.52	8818.72	7721.78	8818.72	7498.55	6508.05	7212.24	7624.37	7532.98	9464.96	7721.78	7567.94	8989.69	8217.25	12154.9	9417.09	7990.94	8547.66	7811.59	7466.56	9086.77	7781.47	8910.79	6711.61	5874.27	7877.18	6271.55	9129.05	7658.65	6168.61	7212.24	7410.55	8093.12	9258.7	11149.4	6210.52	7624.37	8950.71	6365.82	7297.95	7111.69	8217.25	6625.08	7297.95	8624.81	8506.43	8093.12	9038.94
ATP6V1D	617.019	699.479	641.148	680.136	673.168	668.662	726.915	534.307	623.027	622.659	830.567	852.499	596.359	727.637	740.028	879.108	833.781	633.831	863.423	573.072	650.76	587.005	791.594	901.463	721.519	636.572	691.212	894.771	739.525	732.817	583.946	647.346	788.222	750.004	646.128	1084.74	1322.43	859.796	935.199	790.121	842.084	885.753	624.013	581	867.834	587.658	752.974	749.038	815.948
ATP6V1E1	2436.86	1984.12	1722.97	2026.36	2463.14	1236.63	2828.52	2001.01	1864.93	1853.99	2588.38	2794.43	2142.91	2249.25	2428.99	2104.67	2689.96	1745.17	1569.75	2071.64	2231.01	2167.89	1815.74	1862.49	2523.94	2303.94	2104.67	1537.91	2280.13	2440.23	2287	2102.11	2071.64	1686.24	2227.17	2581.1	1888.19	2780.14	3258.25	2362	2613.98	3839.09	2463.14	3629.59	3580.08	2142.91	3957.19	3824.37	2993.66
ATP6V1F	375.656	412.751	227.875	370.387	237.508	347.87	656.559	452.262	431.585	387.229	333.548	541.233	371.994	445.258	400.256	380.88	512.191	386.872	529.615	310.081	439.622	370.097	210.047	448.974	401.464	465.787	480.053	352.927	448.797	505.983	432.456	405.295	381.057	561.701	359.286	277.303	363.312	422.602	576.735	380.521	454.833	629.313	503.5	703.271	552.45	567.936	722.752	644.261	377.044
ATP6V1G1	2037.34	1434.69	2425.22	2276.93	1979.77	1988.64	1611.65	1691.74	1444.44	1315.99	3233.92	1123.43	1971.52	2083.01	2096.99	1899.42	1339.56	1464.99	2158.67	2037.34	1569.75	1400.99	1663.9	2024.13	2170.4	1658.55	1693.47	1688.14	1824.89	1441.44	1917.26	2125.58	1482.6	1840.57	1842.77	1469.35	1410.9	2320.07	731	1491.52	2128.32	1057.98	1635.88	944.188	995.886	1493.3	1081.83	1090.02	2358.47
ATP8B2	195.005	147.254	198.835	236.044	192.455	367.654	207.752	235.739	223.85	220.822	151.183	146.372	268.805	182.849	192.024	126.177	88.5333	138.328	267.586	302.857	208.339	204.119	141.723	224.106	217.099	300.068	230.932	188.215	52.5925	174.939	327.55	176.763	225.852	100.303	162.755	118.526	207.078	160.786	79.7337	138.274	134.872	218.823	254.131	308.192	217.809	217.128	152.444	145.967	75.2131
ATP8B4	211.875	193.461	624.686	154.916	200.697	152.956	214.595	242.8	198.494	201.973	223.906	240.823	353.384	241.008	255.845	309.718	214.007	142.508	195.264	249.772	155.119	152.368	337.331	202.133	211.875	246.193	242.109	1042.81	271.538	167.016	228.654	152.421	254.767	227.374	306.172	209.669	202.197	180.477	221.51	324.004	191.724	118.629	240.823	163.074	230.595	250.345	210.554	204.297	224.221
ATPAF1	259.988	309.595	247.574	340.7	417.753	268.624	221.269	308.316	282.173	330.322	332.718	288.72	340.553	289.703	356.182	251.436	314.213	200.372	312.614	336.015	301.062	305.064	216.63	294.155	318.968	346.678	293.346	226.331	251.083	300.122	368.245	351.405	292.768	287.708	360.22	267.038	352.03	336.126	235.22	380.093	336.736	259.058	256.678	279.395	325.725	319.079	271.641	253.164	231.06
ATPBD1B	316.694	209.52	455.906	290.961	214.099	243.98	359.764	318.968	217.789	185.665	193.321	280.122	302.178	351.12	306.912	227.242	253.623	223.341	271.916	314.608	261.696	259.606	484.84	302.525	285.928	445.965	319.224	284.012	266.29	311.163	304.825	309.182	269.532	239.669	294.788	275.712	191.526	264.772	209.669	295.69	243.619	318.572	378.009	390.601	235.553	342.091	292.221	280.451	260.812
ATPIF1	259.059	232.773	234.914	195.624	146.626	383.387	275.005	252.94	259.237	240.861	191.066	215.335	222.194	258.535	255.696	436.461	262.608	205.52	288.122	209.594	273.424	250.731	217.34	283.474	245.435	301.116	382.987	193.09	274.558	228.43	383.713	242.162	239.393	243.987	220.747	208.063	194.17	226.485	247.931	194.364	281.381	308.671	340.976	267.851	336.006	323.822	389.691	350.16	241.708
ATXN1	343.678	243.379	367.78	305.696	288.181	251.336	292.221	230.974	261.313	254.671	236.24	239.916	306.385	260.812	307.619	325.725	357.529	330.995	152.288	283.488	223.341	187.035	626.246	226.033	283.488	276.586	229.948	338.964	377.223	296.856	304.936	256.295	282.07	232.77	251.914	475.151	230.027	217.121	534.307	458.906	335.093	272.147	219.1	215.185	309.595	258.526	280.451	285.59	332.482
ATXN2	666.975	532.941	571.167	801.376	667.302	564.643	575.582	609.235	543.25	542.632	448.547	610.55	656.216	664.226	619.687	540.968	521.911	752.054	542.346	715.957	695.605	720.754	555.938	623.027	608.482	715.957	571.167	731.466	676.034	557.682	695.985	545.366	576.161	472.473	709.587	581.287	465.354	575.233	672.294	621.693	548.89	714.261	627.613	669.432	613.283	571.76	634.802	731.959	607.168
AUH	167.072	117.569	172.328	125.617	158.773	214.099	87.8672	147.049	147.094	166.049	109.209	118.507	139.803	101.061	136.514	186.481	113.153	136.138	179.043	128.278	135.509	163.444	200.632	206.312	132.204	107.485	125.743	153.587	135.964	81.9925	120.311	194.462	145.06	179.354	187.113	137.144	224.298	161.935	83.0586	147.094	184.201	133.237	109.209	96.074	119.818	118.507	108.356	114.588	161.935
AUP1	150.714	227.718	100.425	134.668	148.739	171.662	110.431	98.9719	110.153	94.6274	139.853	104.662	159.823	143.907	150.059	177.882	175.77	89.0882	217.151	135.084	120.588	89.9945	75.7841	166.689	153.469	148.364	205.234	140.295	134.418	133.389	134.486	152.184	82.8165	141.843	148.768	96.6865	140.875	139.192	134.525	131.909	129.558	120.111	167.279	110.879	95.4702	206.677	81.7908	89.578	160.99
AUTS2	125.493	317.189	179.915	175.467	137.649	95.035	82.5717	186.771	76.2595	86.4464	235.22	100.451	133.831	213.941	90.9373	159.186	43.3086	148.946	159.851	167.072	157.993	157.792	270.312	310.081	130.842	151.504	112.115	169.793	39.6099	80.398	89.8267	258.429	70.3314	104.404	164.799	98.9664	275.712	197.829	17.1811	108.39	264.681	102.487	212.148	183.24	97.1382	174.632	116.674	134.679	206.602
AXIIR	944.9	852.499	668.662	1239.61	876.528	750.882	889.959	1050.65	802.866	894.169	673.497	963.62	1072.79	877.827	842.563	610.55	396.418	609.235	1051.32	831.102	1240.87	1348.29	582.234	1288.4	880.364	1323.88	882.586	498.435	366.222	1142.38	1167.89	995.886	792.128	663.437	1038.06	645.765	769.025	1027.57	634.802	599.767	744.443	1576.07	1018.94	1571.15	1255.63	782.771	951.659	998.07	548.2
AXIN1	101.509	241.128	61.2149	126.811	153.784	275.551	84.4815	167.102	203.494	187.962	131.725	109.329	97.1519	87.7712	94.4079	313.094	208.224	248.761	254.243	133.246	264.32	258.641	60.4215	283.421	147.984	112.043	231.167	175.16	139.992	83.4505	98.1638	171.838	177.678	257.095	131.572	74.2568	326.097	108.554	165.476	132.877	143.368	157.395	294.197	130.114	119.104	240.321	140.033	144.857	182.987
AXIN2	213.585	132.544	73.2484	180.021	141.703	107.008	78.8126	122.558	160.445	168.814	49.7493	110.811	115.897	82.6485	86.3645	67.171	34.586	90.1403	109.732	148.003	130.627	152.52	47.7135	114.305	166.791	141.31	141.644	117.841	14.2333	65.1477	117.425	180.593	110.282	135.632	125.034	48.745	130.627	170.752	52.0338	36.2099	89.7613	116.017	115.679	149.633	58.1308	62.317	86.5857	91.4863	34.0582
AXUD1	1396.88	630.36	1344.57	781.26	655.85	469.584	993.162	729.282	831.102	902.583	1526.82	868.986	608.482	755.49	565.801	1214.86	1635.88	796.595	756.405	648.13	762.913	689.263	2173.14	816.474	909.423	980.946	885.155	516.721	700.33	1100.74	744.015	772.931	879.803	973.358	877.827	1282.55	792.597	917.862	2055.45	1928.7	1173.74	1021.24	681.765	837.548	1103.5	621.343	952.229	974.684	1292.16
AYP1p1	174.469	201.196	79.0653	157.946	94.262	101.126	241.008	168.592	139.753	123.343	166.476	178.699	149.04	116.051	145.468	168.487	244.256	134.458	120.311	102.261	154.288	131.689	73.7745	145.693	230.595	210.192	245.58	161.639	151.546	201.471	173.004	168.271	147.777	176.55	164.534	105.577	230.366	202.133	142.172	153.101	229.59	157.441	220.608	169.172	180.021	257.842	176.133	162.232	148.756
AYTL1	392.591	124.019	314.213	179.548	244.688	88.8304	230.444	53.1073	204.705	217.482	741.008	273.638	280.563	200.372	246.365	196.405	643.87	237.926	95.6735	233.607	121.08	109.1	272.641	217.719	272.147	218.616	52.6212	108.612	152.81	84.8159	78.1141	46.2398	306.281	191.526	190.594	704.512	136.179	233.607	460.407	416.677	171.441	96.9048	261.129	186.173	98.3676	221.588	246.096	256.876	563.726
AYTL2	562.314	324.666	665.861	403.093	359.135	320.984	589.949	476.275	312.953	292.451	401.84	389.352	340.7	579.178	434.707	510.855	437.224	425.626	440.25	452.901	395.426	348.025	652.834	543.25	457.61	617.588	338.122	326.394	392.402	690.194	436.011	492.434	377.527	439.622	577.599	557.682	337.705	554.963	472.201	531.835	548.2	610.887	414.428	633.147	644.988	336.591	692.42	670.146	608.153
AZI2	90.8189	113.777	146.912	88.0197	89.4233	112.683	101.319	71.7646	89.5408	70.3072	97.7078	39.8814	88.1325	127.488	102.55	96.5557	152.183	64.0459	101.835	99.546	37.3435	27.6966	143.658	107.485	105.844	112.478	95.4521	208.234	142.83	62.5719	92.088	67.9535	89.1334	57.8979	90.1403	101.319	57.6029	85.2782	42.9621	147.96	83.9355	56.8473	93.8352	20.2902	53.9339	112.716	23.1017	62.6118	138.363
AZIN1	511.257	543.248	760.08	512.721	584.047	523.973	490.453	630.058	538.648	552.904	495.742	483.191	573.412	446.031	646.215	708.809	687.903	520.144	424.651	658.861	514.948	584.156	785.809	470.193	499.629	420.567	520.148	786.146	539.345	325.863	378.642	543.535	559.162	602.845	571.263	714.831	555.09	580.917	480.211	672.13	522.086	456.525	544.22	427.014	428.869	519.442	497.913	466.988	706.549
AZU1	28.4033	13.4908	28.3465	9.76893	12.1372	131.519	71.1558	9.348	11.0468	5.50634	4.60333	40.0783	265.639	8.70262	75.4807	108.718	2.92449	28.1743	15.2263	1.94718	43.9325	47.5263	17.0317	20.9251	10.3789	5.55068	113.994	889.336	72.2697	0.555116	11.1903	6.57364	14.1308	814.366	21.5029	29.808	52.5734	46.1518	113.114	14.568	151.28	48.1505	112.683	3.97885	109.907	39.7952	15.4595	19.9145	7.14069
B2M	27841.2	16016.7	27841.2	23471.7	25098.2	23760.5	20880.5	28792.2	24441.6	23471.7	25432.6	18139.1	23471.7	23760.5	24441.6	26568.4	16016.7	22908	21406.9	22908	23194.2	17178.4	27438.7	21621.1	23194.2	18398.5	15832	26141.6	30626.8	20880.5	25771.6	27006.5	26568.4	18398.5	27438.7	23760.5	18026	27841.2	20461.3	21621.1	30626.8	20309.3	16412.9	16614.4	20136.5	17773	18527.9	18829.7	26568.4
B3GALT4	176.792	176.428	112.963	192.088	164.6	174.811	295.823	258.526	350.966	410.937	238.625	240.401	234.862	216.271	177.644	218.232	351.26	393.274	208.001	212.085	414.029	459.146	129.8	199.735	164.433	213.799	222.267	173.966	274.875	254.831	274.789	198.099	198.425	224.707	157.54	182.975	151.741	180.839	375.841	313.983	175.651	274.373	310.95	257.748	363.944	278.286	337.178	336.591	174.352
B3GNT8	194.871	185.077	79.0379	112.085	105.606	96.7164	282.623	227.242	146.72	143.839	158.622	213.015	139.122	210.047	143.345	333.831	382.853	276.242	185.477	217.332	196.274	172.793	98.0831	269.643	143.889	174.352	226.808	157.688	435.256	240.823	141.222	164.106	158.19	245.069	124.126	258.325	123.794	166.735	498.052	400.96	109.667	161.683	220.669	114.194	305.302	325.863	262.837	300.558	200.975
B3GNTL1	75.7137	55.1926	59.8866	44.5105	33.0952	38.4656	82.5473	27.8944	37.9961	24.4441	35.0435	39.2807	37.2897	69.9552	52.2753	153.537	163.239	41.8383	71.8577	50.3127	54.5138	37.04	50.8399	70.3314	45.0178	47.5598	43.5882	67.7337	69.3495	80.2509	40.2724	49.8092	44.1847	73.2002	35.1172	97.8887	47.623	36.5647	91.5206	159.906	53.0404	67.9731	82.2752	52.26	81.8073	75.4053	93.9576	87.2811	135.055
B4GALT1	238.859	196.593	228.031	193.72	133.786	269.742	273.967	234.543	163.755	133.666	167.528	173.662	186.236	293.122	175.166	275.712	223.984	204.635	203.427	197.966	131.34	123.185	296.973	177.189	188.697	256.202	214.973	219.166	308.186	321.62	381.365	215.034	245.485	190.978	200.153	353.943	126.606	189.639	272.922	305.439	205.566	144.253	200.153	204.224	165.103	202.053	216.555	168.487	233.524
B4GALT3	968.667	1315.99	630.36	1102.44	1088.16	1137.62	940.286	741.008	1115.7	1013.55	820.648	940.286	747.612	741.008	949.629	611.548	601.999	1022.82	879.108	906.31	1067.24	901.463	888.272	929.81	1382.29	1063.65	859.796	819.173	678.302	1319.8	989.708	1551.03	674.766	1024.36	1081.01	846.995	1686.24	1276.61	558.331	1199.64	963.62	880.833	944.9	1554.08	698.954	1075.27	1058.87	1056.22	1130.29
B4GALT4	154.768	114.816	158.823	117.317	182.323	163.539	117.317	155.018	138.245	157.289	218.02	173.502	172.558	187.801	182.442	229.063	111.944	150.988	161.736	128.697	147.734	186.976	123.68	181.337	124.776	122.859	153.828	186.294	117.984	141.087	190.485	153.875	144.502	148.756	195.392	213.214	158.926	148.803	178.882	143.302	185.403	143.57	143.433	118.064	155.903	123.828	121.31	140.583	253.087
B4GALT5	472.473	309.458	863.423	437.224	356.437	186.533	375.181	422.988	485.935	483.865	625.494	360.064	342.249	467.779	423.383	1635.88	1122.52	562.314	824.595	432.456	375.841	344.418	978.081	911.642	558.016	331.815	379.213	824.077	669.432	601.603	313.602	491.093	686.834	726.915	413.824	1307.05	564.913	417.016	858.748	650.12	771.377	401.292	402.02	213.433	336.126	360.486	423.781	441.952	1295.93
B4GALT7	246.289	293.007	137.47	251.26	289.243	209.742	302.885	234.862	190.147	231.576	246.856	333.27	244.352	226.727	217.121	145.06	226.331	183.534	141.047	202.803	225.798	242.201	82.7243	189.099	258.034	324.929	356.583	145.153	167.345	321.908	275.712	284.428	166.476	220.669	253.931	156.743	257.201	248.709	222.331	319.903	225.554	301.062	340.132	379.81	250.029	342.249	311.66	306.172	182.138
BAG4	71.2859	40.2816	76.7844	77.0958	65.3171	44.9629	78.5902	75.6435	131.298	131.424	84.7867	45.169	112.368	87.5149	52.3056	43.6496	59.5398	225.554	34.1642	98.241	145.293	154.867	95.4227	45.7801	65.3734	59.9027	36.6437	69.0714	122.283	54.849	65.9802	51.0385	65.7112	68.4494	50.0999	68.632	48.2188	66.6096	18.452	153.631	96.0096	48.7924	48.3435	49.7189	42.7025	51.8217	68.7811	66.0582	76.8337
BAK1	89.1881	83.3546	85.5087	108.074	107.085	165.005	155.248	268.027	116.64	97.8029	276.124	217.482	93.7238	219.835	106.752	131.34	104.343	142.78	112.301	128.896	126.529	116.601	66.6943	90.9652	137.425	100.08	119.446	151.99	224.221	122.789	141.703	115.431	158.138	159.801	111.151	146.33	115.134	143.517	244.992	62.8141	85.3078	191.833	131.256	244.688	202.862	115.173	200.227	200.764	99.8221
BAMBI	49.735	32.5174	280.759	35.543	46.3486	28.4259	41.3054	22.9077	36.3815	47.8409	86.5616	12.8186	69.7805	53.1073	64.7878	47.9139	34.0389	64.0813	38.9527	34.5006	65.6432	95.0658	88.8601	52.496	117.984	30.1981	34.9448	68.2923	65.1875	49.2447	104.109	48.5354	53.4096	41.4715	42.1164	48.5792	108.319	28.093	31.7135	81.1706	25.9366	19.5938	23.4457	2.57118	34.7193	26.16	13.2214	30.9594	60.2681
BANK1	323.889	255.845	248.447	312.861	387.043	425.251	132.081	368.391	272.922	262.933	260.905	207.453	399.93	166.255	233.863	230.512	177.297	309.458	313.076	300.448	317.189	302.294	362.976	280.34	193.066	297.228	356.757	163.338	96.9435	276.982	263.048	323.756	250.092	217.187	205.63	235.887	111.433	182.2	96.7164	163.239	133.237	105.21	208.655	152.029	172.614	440.25	79.2907	109.57	196.148
BASP1	10915.9	7658.65	11340.4	7877.18	6271.55	10737.3	5953.5	5953.5	10499.2	10386	9371.65	7532.98	7410.55	8055.38	9731.52	22908	19796	11532.9	13063	8779.14	8698.6	9129.05	15927.6	10386	7436.48	6913.4	10173.9	10786.8	8429.52	7436.48	6529.99	6603.65	8734.98	12837.5	6643.65	10737.3	7532.98	7811.59	12761.5	13323.8	8818.72	7321.84	8295.32	5288.69	6004.76	10173.9	5771.97	6625.08	12515
BAT1	298.341	934.21	249.52	359.131	343.287	788.958	253.131	332.823	343.326	365.919	317.089	271.352	356.81	338.116	312.302	530.496	490.514	325.496	993.072	314.986	389.693	379.69	283.117	887.793	292.042	288.077	709.429	538.806	343.189	312.676	396.132	331.884	310.959	400.763	326.89	283.784	352	259.159	218.358	276.969	290.493	283.437	583.354	306.315	276.2	554.141	257.995	263.032	235.344
BAT2	162.288	209.249	80.7883	170.904	89.1068	207.087	212.597	169.738	173.328	181.275	128.367	201.398	125.203	138.801	123.985	301.445	275.712	327.803	273.424	137.704	235.553	205.195	70.1106	259.232	143.015	147.595	148.756	166.207	238.195	121.791	139.269	150.439	216.555	299.776	192.392	122.365	130.119	137.704	347.108	174.073	117.569	205.836	166.161	195.128	214.242	171.335	270.213	257.563	186.533
BAT2D1	783.269	742.574	1121.44	1063.65	1273.4	752.503	653.681	794.524	864.608	1001.33	1051.32	808.942	1006.36	976.678	840.41	729.282	639.831	996.582	574.67	1103.5	973.358	976.678	1068.03	650.438	824.595	718.111	634.802	823.52	774.83	701.106	870.159	824.595	788.653	661.027	944.188	1022.82	858.265	871.956	753.97	644.261	801.376	715.52	776.352	893.638	692.42	662.764	667.621	761.614	862.217
BAT3	449.366	745.816	135.77	541.233	474.203	298.15	1239.61	612.928	527.066	540.422	268.807	1224.71	438.432	307.73	434.288	337.851	569.165	730.074	288.608	456.608	543.25	572.401	224.071	429.235	566.826	719.247	650.76	600.075	548.89	586.673	294.256	502.281	701.106	954.995	543.25	484.592	1175.73	570.614	1063.65	917.862	513.265	839.266	568.483	901.463	670.454	540.422	889.336	939.543	633.147
BAT5	453.114	641.967	188.826	375.343	371.228	320.848	363.146	295.949	440.619	361.073	493.36	328.996	339.982	362.192	444.044	598.924	728.139	346.803	422.069	335.224	315.267	346.952	198.22	360.22	395.601	346.952	621.985	311.449	387.988	347.87	279.636	463.874	366.946	504.014	419.403	373.74	485.618	368.588	543.883	446.334	427.864	402.02	481.744	305.302	403.277	577.599	322.405	360.935	564.913
BATF	316.317	185.916	74.8978	183.427	144.118	86.6391	183.938	165.452	174.301	140.414	293.787	192.392	203.635	197.06	212.675	180.357	254.922	191.342	144.962	177.82	178.882	159.801	82.7696	142.044	222.899	235.462	201.973	143.056	145.608	274.875	224.774	268.027	155.797	212.148	194.526	111.609	178.561	267.712	276.489	275.517	221.269	278.991	227.943	215.256	404.74	233.952	284.734	255.585	226.891
BATF2	7.12809	8.51691	39.6099	14.7571	46.3336	14.272	55.0537	59.926	81.2247	68.9781	766.792	31.9869	21.2675	115.762	7.47469	22.4471	19.3736	46.6024	20.0342	21.7405	6.10954	8.95301	2.30598	27.5713	110.131	25.8985	24.7975	21.4587	95.8656	43.1548	38.4056	26.2047	29.7086	19.3875	20.3933	19.0195	87.1181	36.1016	134.213	9.49892	11.5109	88.4453	22.5169	8.60702	75.2459	31.9304	13.8953	24.78	119.695
BAZ1A	544.641	559.739	783.344	588.386	584.969	525.335	478.36	494.26	769.289	796.898	1121.95	458.947	482.041	528.782	572.817	1201.06	800.604	932.443	757.146	569.157	653.981	682.115	921.088	730.25	650.161	434.254	457.999	824.923	877.37	383.076	402.337	506.319	595.019	678.989	495.219	920.904	642.992	443.778	422.787	689.32	681.677	556.834	423.575	299.33	386.106	462.574	483.736	446.743	1123.34
BAZ2B	948.397	633.517	1204.66	693.296	582.234	591.241	533.769	618.959	768.107	840.41	527.416	530.723	659.168	623.027	627.94	1325.19	805.893	1053.09	671.949	769.93	715.52	770.937	906.95	825.588	588.311	566.462	514.371	1084.74	647.736	395.926	653.681	640.859	843.789	710.99	817.973	1001.33	800.856	653.281	650.438	604.745	688.901	586.07	653.681	318.442	531.835	592.48	700.687	726.537	1315.99
BBC3	138.282	146.528	120.625	189.099	141.999	146.33	206.82	116.38	135.409	128.819	130.047	182.2	149.136	118.267	189.69	142.332	237.508	160.76	137.971	138.942	127.412	102.296	146.666	118.431	136.738	163.338	171.126	105.973	143.386	188.762	95.638	157.497	180.254	150.699	215.402	183.702	280.968	123.06	233.109	174.255	157	215.554	110.841	211.404	193.461	146.034	188.181	195.765	188.826
BBS2	171.54	419.973	249.34	259.886	384.475	322.52	181.694	257.563	333.151	310.081	111.763	236.9	230.747	211.478	198.038	302.402	149.882	176.843	261.922	214.595	282.293	283.804	274.662	273.727	251.528	263.645	311.29	224.774	127.071	198.754	305.545	228.654	212.148	266.105	248.355	202.483	218.616	170.314	146.479	177.876	189.414	172.281	277.726	146.958	126.529	212.447	171.225	167.288	154.236
BBX	397.069	524.342	669.743	565.259	634.479	674.375	436.011	682.162	781.732	768.556	762.059	362.976	504.587	581.602	384.795	366.368	368.887	967.927	564.913	657.719	702.049	828.328	672.294	540.716	496.614	416.109	406.883	605.069	604.745	486.604	613.283	493.795	538.697	502.281	578.805	408.43	483.385	468.457	319.224	362.054	444.24	486.352	532.091	341.682	358.384	452.671	378.009	399.93	525.481
BCAP31	1304.69	1299.72	988.977	974.684	744.015	1212.4	1329	1132.17	1020.39	902.089	895.93	1322.43	931.109	1213.66	1054.7	1405.29	1400.99	1034.38	1613.14	893.093	1082.88	970.769	920.53	1475.39	1017.25	1375.24	1222.57	1087.27	1124.96	1220.24	1173.74	972.067	1243.41	1896.93	874.854	1053.09	1041.94	977.368	1847.22	1329	1130.29	1352.37	1297.27	1288.4	1428.89	1292.16	1395.65	1345.81	1053.09
BCAS4	104.705	69.7354	74.8027	125.743	82.4425	72.1162	66.1452	115.939	162.232	134.926	54.5138	120.002	107.447	90.0268	88.2389	59.8866	54.3929	99.8866	100.92	110.2	83.7346	86.6651	46.8171	127.488	111.464	153.923	182.554	66.5074	35.3368	156.694	159.482	149.882	101.158	152.087	90.8501	80.4244	69.3495	84.0502	88.3846	82.3862	83.5387	95.6735	123.105	161.44	161.831	102.984	94.8877	91.4181	57.8275
BCAT1	61.3232	31.2672	97.1725	48.1202	50.0573	47.8238	40.8006	76.45	37.4866	37.2103	51.021	74.8475	89.1881	52.4097	56.6433	119.818	94.4085	45.3546	131.933	83.3289	42.0059	41.9058	538.465	59.9477	107.866	42.0635	70.1793	90.9925	84.6509	106.349	48.3988	89.4233	87.5406	45.794	118.629	66.2006	45.2578	64.7463	218.02	93.0968	74.6518	122.896	53.5606	70.4024	89.7613	38.2257	61.1567	46.0847	353.666
BCDIN3	1212.4	1035.93	514.652	991.779	902.089	534.599	822.327	700.33	722.752	861.023	808.351	853.111	1025.1	670.146	924.366	901.463	721.519	719.719	846.583	812.211	874.854	891.226	305.302	693.668	1240.87	1001.33	988.345	658.827	525.75	774.83	855.427	1239.61	782.253	934.479	1146.06	692.858	899.015	919.201	861.023	888.795	944.188	967.927	953.695	911.642	951.035	1068.91	795.559	925.032	757.39
BCDO2	259.147	239.754	277.185	339.552	336.736	271.825	350.966	221.965	302.758	255.845	251.622	346.952	284.734	182.2	361.755	254.319	385.418	303.98	280.563	283.918	258.609	194.871	323.527	218.392	275.293	293.674	274.286	212.597	273.036	336.126	198.36	237	381.697	315.01	370.905	392.212	658.113	196.855	410.937	335.9	281.3	379.947	218.796	370.097	299.29	210.835	372.486	437.41	326.394
BCKDHA	329.527	448.123	176.251	339.405	344.124	389.514	330.995	377.044	363.77	421.871	317.189	348.025	352.927	284.834	347.358	349.965	442.769	339.982	549.836	192.266	428.394	469.846	181.459	472.992	296.973	305.064	306.523	366.513	486.145	350.393	296.525	281.188	357.072	273.136	347.619	168.632	265.918	257.486	495.928	220.669	312.861	404.74	501.594	436.011	418.63	464.342	472.707	523.251	203.697
BCKDK	1331.16	1048.2	1689.84	1184.3	1066.34	887.483	2012.06	1447.25	909.423	921.218	1333.86	1327.78	1167.89	1396.88	1549.73	1228.77	1584.37	1057.98	989.708	1158.98	1133.96	1067.24	1238.78	1043.54	1195.8	1566.56	1137.62	992.509	1536.33	1844.98	1335.26	1049.01	1206.86	1105.97	1302.09	1424.72	756.405	1315.99	1632.34	1901.85	1095.8	1601.18	1315.99	1587.72	1703.6	1398.22	2236.86	2116.68	1309.53
BCL10	158.405	90.6684	241.757	203.199	167.175	134.134	110.934	85.5392	117.026	113.467	232.312	104.343	153.923	153.244	238.859	155.751	148.897	136.966	102.916	183.534	126.49	131.378	377.044	99.67	145.753	172.006	139.945	157.395	222.191	166.911	122.174	119.309	124.584	128.33	140.583	196.992	146.666	164.961	181.825	180.541	112.478	136.923	102.235	62.9567	138.989	115.613	111.218	123.642	229.144
BCL11B	562.383	695.65	319.286	624.346	571.27	451.7	357.975	494.216	537.459	539.779	292.298	399.762	582.79	397.54	317.154	232.878	177.755	379.925	381.348	624.15	524.165	478.563	239.85	403.366	587.478	544.224	543.051	313.184	87.757	476.677	769.303	670.846	385.191	478.655	584.79	361.57	477.355	482.586	237.303	258.959	354.373	514.627	536.454	602.866	521.789	446.959	319.49	355.708	170.059
BCL2A1	49.0808	28.1597	53.5786	27.9838	34.8203	55.6902	13.6198	46.5091	48.2188	26.8672	31.5782	12.0542	20.9425	44.8418	40.9703	161.885	80.8907	30.5497	135.452	31.8684	19.0046	29.0559	70.9011	121.791	18.3193	21.1289	26.6097	96.5829	101.126	16.1023	34.5006	36.9559	80.613	58.0303	44.7462	19.5356	14.0093	37.4967	29.7411	61.3061	55.6902	9.11759	23.5909	5.23894	4.85405	22.1772	8.77936	5.58754	98.2157
BCL2L1	2352.82	8772.97	2229.19	5158.76	6036.43	2998.97	3962	3982.95	6754.35	6641.43	3151.59	4428.09	2968.09	1093.53	3134.52	4321.15	2152.53	5771.31	3887.58	3850.94	4951.64	5376.36	2916.71	5644.34	5175.83	1965.47	4941.57	5312.89	2211.02	3840.01	1023.35	5027.19	4448.86	7267.25	3652.28	3758.83	11880	2621.54	4482.42	4538.62	3563.58	2738.58	3763.63	4831.15	2060.38	2901.43	3450.48	3408.61	4136
BCL2L13	752.054	1038.72	714.675	1257.92	1248.14	419.403	848.727	764.775	952.99	959.131	840.41	1041.94	970.769	633.517	1030.04	482.63	771.377	1011.31	654.38	952.229	839.266	886.382	647.736	717.666	1055.52	628.347	622.659	922.398	727.285	894.169	604.745	962.87	917.862	804.347	986.927	1048.2	2161.88	879.803	636.572	1119.54	901.463	820.648	775.853	876.528	825.588	692.858	942.838	1012.12	961.204
BCL3	257.842	153.687	42.4947	154.236	89.5408	159.133	173.662	165.32	173.966	124.463	214.973	-22.8889	104.578	95.3376	135.727	625.494	516.159	248.021	406.343	137.381	139.945	-24.3708	65.6905	355.026	204.297	159.027	241.008	194.989	273.529	138.112	59.2658	163.694	226.417	366.677	220.073	146.958	93.8667	179.413	614.616	281.188	243.706	153.587	149.509	-22.8889	-24.3708	211.607	-25.33	154.975	329.256
BCL6	4118.98	2694.12	2977.96	2314.67	2498.55	1751.16	1779.34	1589.99	2666.81	2639.99	3995.81	2020.86	2045.57	2280.77	3026.29	5706.05	7078.59	3254.57	3403.52	2958.01	2136.75	2304.54	5257.32	2979.42	3167.61	2175.89	2249.3	3425.21	3034.45	1881.41	1245.95	2497.56	2450.66	3056.16	2343.1	3818.59	1988.41	2982.9	4612.3	4164.9	2858.91	2059.18	2335.41	1256.66	2905.21	2584.36	1673.37	1743.12	6640.2
BCLAF1	348.533	387.148	482.438	403.11	383.74	478.826	288.938	461.254	413.061	497.482	369.137	355.171	407.46	286.354	332.641	465.358	323.553	433.229	425.689	412.524	433.41	447.003	455.492	415.332	322.269	315.263	346.722	361.112	354.541	236.1	295.585	349.004	394.19	351.233	361.307	405.586	300.931	340.908	259.034	304.501	353.877	357.986	371.159	281.425	216.815	346.671	275.829	301.875	362.661
BCYRN1	677.917	629.659	648.593	733.643	528.78	868.347	674.375	929.091	758.928	618.554	300.905	433.073	669.044	1008.7	635.48	579.178	574.938	1357.06	826.151	799.611	712.607	707.865	903.906	553.261	972.702	746.245	839.772	1228.77	1161.09	665.076	869.604	701.582	886.382	353.943	731.959	596.661	518.781	633.517	397.753	744.863	1098.24	468.457	880.833	594.716	332.482	704.512	671.949	595.637	927.056
BECN1	695.605	600.075	720.754	672.294	892.442	583.946	615.938	446.712	942.133	998.07	837.548	549.215	763.354	585.785	758.417	491.945	755.49	914.582	493.142	691.212	969.481	939.543	832.629	534.307	718.868	553.546	662.344	519.853	595.637	639.466	552.705	697.722	510.855	565.801	624.013	875.966	1213.66	749.508	532.331	856.536	868.347	497.32	632.779	458.253	598.582	590.947	635.162	570.011	756.925
BEST1	570.011	634.479	507.202	490.087	452.901	296.754	554.377	326.89	542.346	539.835	764.314	744.863	399.26	631.453	676.379	1249.18	1116.77	569.165	505.492	584.867	361.073	365.001	621.031	708.775	472.473	534.599	649.311	450.149	800.856	617.322	412.569	481.744	520.384	476.739	539.299	943.551	552.122	545.084	770.44	1200.56	629.992	520.384	471.949	401.464	487.986	449.551	742.114	731	1011.31
BET1L	1244.6	1979.77	2394.56	1428.89	1856.21	1520.45	1413.61	1513.87	1181.15	1225.77	1050.03	1280.1	1833.94	1502.66	1488.58	1130.29	1236.63	900.859	1305.87	1473.93	1417.97	1378.13	2190.39	1134.94	1294.73	1510.42	1350.99	1120.56	1190.01	1947.19	2178.39	1531.43	986.927	989.708	1424.72	1464.99	1088.16	1230.82	991.074	1552.5	1117.73	1034.38	1574.53	1141.39	911.642	1596.18	1257.92	1295.93	1248.14
BEXL1	454.493	243.236	484.681	289.828	425.046	230.17	270.039	302.981	303.955	366.903	186.08	345.614	363.026	294.394	347.326	194.645	160.671	179.246	248.403	363.85	456.434	425.456	373.488	323.522	319.563	355.996	281.408	298.193	166.135	298.534	510.069	359.101	276.638	267.541	285.228	288.668	147.942	386.33	175.793	300.431	266.808	367.681	257.202	395.396	350.467	205.019	366.848	369.062	185.985
BFAR	237.265	406.722	252.202	286.282	304.825	546.808	158.571	296.268	332.482	337.331	283.918	266.29	249.772	269.328	245.919	328.861	228.737	325.863	375.841	242.957	365.815	377.836	249.151	298.271	271.825	185.214	332.244	338.397	280.005	263.726	312.861	248.275	287.812	285.477	292.124	240.168	315.01	245.069	226.502	143.116	241.346	224.633	318.442	222.488	195.566	265.546	208.655	202.329	233.692
BHLHB2	1399.5	813.776	883.274	789.217	1512.17	859.796	787.708	1481.27	850.816	991.074	738.1	904.529	857.626	861.683	1146.97	1090.84	996.582	1032.09	1173.74	1254.47	1220.24	1273.4	1203.61	925.749	798.619	794.086	640.501	913.372	858.265	1049.01	888.272	1015.6	1034.38	1313.31	1225.77	1056.22	801.376	908.125	1383.46	937.601	884.585	913.372	993.676	1376.65	1632.34	741.008	1090.02	1179.06	796.595
BICD2	1216.66	1085.13	1317.76	1196.77	812.004	848.271	699.961	606.616	796.192	746.838	685.906	827.005	998.748	1131.03	1212.62	1240.88	1136.62	915.339	1269.36	653.46	867.313	872.115	1581.99	1161.81	1054.59	1074.85	1198.18	884.837	942.609	698.851	907.702	962.09	805.508	984.444	994.675	1145.02	905.503	773.052	852.527	1264.21	807.949	662.601	1289.4	465.604	515.173	1306.59	683.837	826.524	1084.08
BID	486.552	429.64	596.016	463.278	427.734	396.658	410.906	372.238	438.752	377.806	499.866	435.494	353.817	529.319	524.31	571.674	594.787	356.9	537.48	542.629	348.805	358.391	737.659	470.072	556.892	531.429	482.461	313.188	664.164	308.677	316.807	393.489	443.602	416.445	482.007	535.271	288.708	532.749	406.566	457.561	457.354	454.082	488.252	257.955	427.884	461.646	436.654	412.228	421.388
BIN1	594.39	1071.1	284.012	560.213	580.084	789.217	571.167	806.362	657.719	611.22	500.399	762.449	722.752	698.143	430.639	488.707	246.512	646.908	808.942	693.668	1005.09	1123.43	306.172	958.512	530.475	634.139	716.427	503.226	249.772	908.125	1038.06	898.394	781.732	715.957	621.343	447.574	672.294	489.194	626.582	364.389	628.347	898.394	932.434	1214.86	1099.89	528.231	787.708	799.116	207.152
BIN2	2050.11	1933.93	2627.03	2390.52	2200.05	1800.24	1984.12	2350.63	2734.75	2618.34	2417.96	2921.73	2231.01	2810.08	2107.91	2753.32	1957.11	2942.43	1885.74	2200.05	3029.89	2947.01	3258.25	1874.32	1988.64	1842.77	1777.77	2794.43	2839.32	2486.87	2270.89	1808.6	2336.58	2280.13	2276.93	3024.14	2224.07	1815.74	3403.34	2425.22	2382.72	2236.86	2178.39	2496.64	2789.73	1669.06	2803.71	2673.75	2744.42
BIN3	102.55	133.585	90.4343	85.2515	81.4668	76.8886	64.2939	37.4866	117.915	90.6139	97.2043	51.4428	78.9389	51.3609	65.8739	130.721	125.203	224.774	70.4205	96.4056	128.33	124.019	78.9156	80.4535	113.261	80.398	92.987	105.639	125.076	42.1426	57.0254	106.752	74.6279	138.026	98.6801	107.805	147.233	89.7359	91.6764	87.7911	110.613	79.1392	116.085	58.1308	41.0741	99.1237	53.9699	45.3819	159.434
BIRC2	108.184	141.827	366.677	226.112	319.754	220.464	201.727	165.622	249.699	285.59	290.062	284.633	313.85	208.234	338.841	92.0018	146.226	374.701	85.6424	290.961	183.702	200.03	370.097	112.963	215.788	155.432	118.584	144.3	173.502	232.586	224.551	158.138	336.126	154.673	181.694	419.973	380.521	193.988	200.921	257.842	221.661	248.793	109.701	253.349	208.723	116.572	202.406	229.59	244.615
BIRC3	524.79	511.023	505.418	706.019	646.711	842.204	343.684	443.75	627.225	542.409	554.395	390.127	704.336	339.75	418.141	444.914	233.496	588.159	681.711	687.919	546.184	492.219	368.613	506.318	541.243	568.186	627.727	419.443	179.387	445.423	779.95	694.404	374.046	462.543	478.873	386.636	364.677	456.929	163.722	199.388	329.403	310.863	449.835	393.167	373.925	420.903	197.893	194.973	321.226
BIRC6	151.365	126.252	212.597	165.398	169.554	94.1994	191.724	194.871	164.047	172.328	152.087	120.39	159.968	121.152	147	189.639	143.889	181.398	130.842	173.166	164.653	167.23	280.759	146.034	221.202	154.442	113.467	225.705	174.469	93.3265	129.476	168.912	145.652	111.041	172.006	157.993	166.362	196.665	87.8418	155.075	155.347	81.0525	142.922	103.946	88.9648	101.026	100.163	120.39	231.973
BLCAP	210.405	288.042	332.594	253.623	227.683	198.288	360.935	310.825	281.412	271.825	243.706	375.343	242.039	380.716	234.107	248.188	232.312	348.025	299.639	235.633	316.211	263.645	238.355	267.21	253.349	293.45	262.674	225.253	289.467	369.479	307.505	290.402	329.367	271.134	254.028	293.45	299.194	268.72	369.043	242.288	253.437	325.322	286.282	381.856	287.353	271.32	387.988	337.986	249.151
BLK	73.3465	82.7696	17.19	57.8784	86.1017	173.269	12.8432	152.81	49.1213	41.1808	43.2146	45.2718	100.138	17.2121	59.81	127.949	57.8618	80.5353	80.8409	82.7243	71.9023	62.4927	34.7609	99.8221	48.4624	53.918	176.133	44.8977	14.0765	78.9156	42.9484	96.9435	44.2182	210.405	48.329	12.4643	30.7156	47.4978	15.0806	46.1398	38.6939	18.8869	64.1364	47.8238	39.577	190.978	7.44115	7.20553	40.497
BLMH	198.22	148.143	299.29	163.59	166.415	356.437	160.391	202.053	148.756	170.314	148.102	165.103	169.234	204.161	134.882	190.018	122.089	106.206	258.876	186.976	188.697	199.593	294.256	250.995	190.217	270.312	177.59	190.42	130.387	200.502	311.547	211.19	172.281	176.965	173.502	199.735	167.288	184.061	51.524	133.545	173.966	154.236	156.743	157.738	192.458	147.44	131.56	152.907	149.882
BLNK	45.8746	69.3988	45.4615	65.9601	96.811	264.681	27.7791	85.3598	41.9794	57.7373	84.2862	60.8721	103.353	54.739	70.0615	63.7109	42.0531	94.3224	48.6973	79.5649	68.2061	78.3448	101.192	44.4448	36.0412	58.752	104.643	33.1151	24.7919	64.4874	118.544	65.4829	48.745	75.8927	43.5248	45.794	31.4585	44.4307	7.60666	36.0737	30.0235	9.05265	52.3232	62.1734	39.6573	144.917	6.79097	13.8384	29.8317
BLOC1S1	786.247	1031.29	479.555	814.909	463.226	838.049	979.559	833.781	1002.02	841.05	1212.4	787.708	944.188	671.949	936.474	1338.1	1442.97	957.86	1442.97	837.548	1068.03	834.875	452.262	1523.64	906.31	675.188	1395.65	1105.97	1036.8	870.831	706.072	1035.24	899.015	1923.56	1065.39	638.336	1325.19	853.111	1064.59	993.676	1181.15	792.597	1171.43	757.39	952.99	1372.25	912.748	880.833	989.708
BLVRA	453.699	500.897	317.078	435.656	328.861	291.186	423.587	451.236	402.926	328.189	602.739	413.296	458.037	596.359	568.782	309.458	794.086	222.398	356.583	398.797	332.594	211.329	171.89	264.024	499.916	526.551	605.372	485.935	644.988	381.365	567.679	306.172	387.596	214.748	372.323	187.113	260.354	417.573	478.401	302.053	378.519	369.653	485.935	356.048	511.125	682.162	386.57	378.9	437.224
BLVRB	411.651	578.498	458.719	976.678	412.208	69.8002	1155.07	321.366	353.384	228.737	315.01	584.867	320.305	673.497	348.728	250.345	163.132	446.334	400.089	560.811	339.833	188.365	440.863	255.758	294.155	544.808	574.67	659.168	475.151	684.72	354.438	594.051	486.145	386.872	443.211	665.076	542.632	618.554	243.55	976.067	825.588	266.195	448.351	408.069	158.724	444.622	376.866	355.528	578.221
BLZF1	129.89	102.43	236.543	125.445	165.398	152.715	112.153	126.061	150.885	152.368	210.128	91.0796	137.935	155.751	189.583	140.358	149.334	139.502	120.503	135.816	132.8	147.393	241.008	100.138	125.534	129.222	106.827	133.786	196.466	84.9933	128.123	121.112	134.011	119.858	148.803	196.928	140.767	139.122	95.096	134.971	151.23	98.3999	92.4891	68.9141	102.889	109.538	83.7649	107.292	212.295
BMI1	419.973	404.948	490.829	505.492	498.914	423.168	298.15	480.957	447.574	395.772	422.246	389.204	432.456	348.437	358.979	318.572	209.742	367.249	363.146	412.408	525.481	497.796	564.913	480.284	414.029	398.41	372.665	377.044	317.078	326.644	496.123	471.501	358.548	387.043	379.675	354.889	285.042	449.764	244.826	256.202	317.078	386.721	385.104	443.431	381.057	347.752	276.022	287.451	254.124
BMP2K	123.29	177.984	281.885	232.681	289.509	101.842	169.689	173.445	245.63	259.544	120.841	257.873	153.752	98.9741	186.066	105.437	140.723	209.367	95.6595	187.518	153.197	155.136	237.124	147.015	171.668	106.396	155.724	297.242	148.803	131.998	94.2334	135.375	339.415	148.602	169.186	186.807	684.574	173.288	126.194	292.285	187.736	127.829	93.0772	124.796	110.969	87.8958	156.926	157.184	168.732
BMP6	217.451	300.485	230.273	358.267	247.381	5717.46	178.395	358.487	261.678	275.67	271.582	193.758	521.79	321.861	206.864	277.534	200.671	177.86	260.933	242.184	224.451	228.522	160.031	214.3	316.957	258.191	266.996	290.831	173.773	252.096	1892.7	300.384	280.855	261.449	180.292	174.325	353.013	261.405	192.903	195.013	219.556	168.57	210.135	249.706	452.399	1089.25	172.084	176.814	136.9
BMS1L	497.078	420.353	532.091	490.58	502.563	411.651	455.067	500.146	393.618	385.418	477.64	546.518	538.965	495.211	396.73	314.096	228.588	353.816	376.53	523.251	416.677	442.562	482.63	410.756	531.528	558.016	483.865	377.377	313.85	708.29	839.266	522.159	396.895	322.914	523.017	415.723	368.084	450.818	374.542	265.918	378.009	624.013	519.048	784.2	616.679	424.52	569.715	523.515	241.179
BMX	33.8279	15.1013	35.9572	17.1486	23.9028	8.06231	32.2145	15.1679	31.8359	29.8725	108.372	48.1054	33.3101	29.374	36.2575	66.6806	93.1955	57.3486	14.3967	51.0901	11.5744	12.8762	62.5471	24.1479	16.2712	24.8803	20.176	68.5909	32.8282	42.4419	18.8248	27.1908	33.1347	29.2266	37.3514	132.26	30.3423	40.9536	111.551	104.29	43.5442	47.0287	18.2051	19.9618	58.1434	29.8071	50.4677	49.7033	114.109
BNIP2	1033.64	715.069	760.366	707.351	752.974	909.423	534.054	868.347	1071.1	1038.06	1007.92	755.927	774.83	546.236	1012.83	1248.14	1019.66	844.361	1107.62	853.689	1096.65	927.056	951.659	1123.43	740.028	590.616	722.752	1026.72	995.886	476.275	539.835	837.01	787.24	990.362	826.151	849.73	831.102	920.53	516.721	904.529	1068.03	485.935	581.602	458.719	593.688	713.906	598.924	576.161	1058.87
BNIP3	235.803	165.398	220.845	222.661	208.505	207.93	99.2991	156.847	226.112	231.492	183.427	109.934	249.52	159.584	174.986	133.711	65.0186	135.452	179.66	189.583	152.368	197.767	164.106	180.357	185.273	165.452	151.28	168.7	61.951	172.374	176.373	258.124	186.173	129.14	232.402	117.984	143.658	184.837	54.8312	100.786	155.903	154.975	120.168	131.647	127.412	114.954	93.4741	87.6175	96.0096
BNIP3L	1057.15	1413.61	4062.62	2376.2	2242.91	901.463	1167.89	1645.19	2853.57	3096.28	1398.22	2379.75	1820.46	730.074	2474.64	1012.12	942.133	2052.82	910.552	1584.37	1383.46	1552.5	2824.42	1851.79	1840.57	669.044	911.642	3694.3	1353.7	664.226	972.702	1255.63	3227.22	1381.09	1532.66	2584.98	9464.96	1393.07	1469.35	1499.61	1529.99	973.358	718.111	1083.72	921.218	609.597	999.012	1099.02	2519.68
BOLA2B	1278.94	879.803	591.241	1386.12	557.387	1792.75	1292.16	1152.07	1376.65	1422.2	1368.14	1619.79	1599.5	946.282	1131.24	881.852	962.129	1193.83	1150.07	1405.29	1684.1	1810.86	572.689	1281.28	1369.51	1680.24	1722.97	960.567	911.072	1300.84	1633.92	1602.81	1167.89	1139.51	1543.31	591.831	1293.39	1071.97	1049.01	824.595	1609.86	1435.89	2170.4	2227.17	1724.73	2239.83	1552.5	1537.91	664.621
BOLA3	386.358	340.818	316.816	390.601	262.019	447.973	353.525	285.928	334.806	321.23	400.796	344.862	392.402	289.821	394.791	276.377	254.767	291.186	363.77	358.84	374.701	354.097	291.869	373.268	385.903	388.14	446.508	299.29	135.555	429.844	570.614	510.855	354.582	347.473	443.636	255.845	530.723	357.236	159.269	250.822	354.739	301.315	487.322	375.656	427.658	474.696	330.837	324.809	163.649
BOP1	352.764	483.137	359.616	313.23	424.354	311.547	609.881	378.195	295.949	253.931	352.609	448.547	320.452	450.589	286.617	250.722	334.806	275.617	287.708	345.329	313.983	332.871	379.213	256.384	390.025	639.831	470.583	328.724	363.146	699.886	717.277	345.485	329.771	328.189	339.552	368.887	248.447	312.614	323.756	392.591	325.579	429.235	606.304	630.728	548.89	558.62	479.065	521.911	190.782
BPGM	90.206	277.775	487.039	386.166	336.359	101.594	229.886	213.412	645.814	575.761	213.153	482.931	255.378	98.2237	309.116	91.7691	118.662	253.47	96.329	167.895	126.461	116.058	418.447	331.762	368.161	94.466	158.491	1102.99	139.155	186.821	123.057	204.964	711.8	276.912	189.608	624.286	2902.9	140.934	348.883	394.946	215.951	169.926	82.0126	267.978	164.555	67.1937	202.614	222.424	285.543
BPI	81.4927	49.869	471.297	28.9971	40.2112	205.416	250.631	20.4302	35.7582	47.0771	24.4385	155.075	702.445	132.17	243.706	248.881	114.55	72.2021	35.747	28.4259	56.5735	63.6052	116.572	41.2771	44.3329	45.769	139.753	2576.22	233.109	89.0195	45.8109	47.1842	78.616	1086.51	141.916	131.769	109.538	89.8004	784.727	66.7366	333.151	235.118	140.943	36.9754	929.091	147.777	109.667	99.4307	78.6941
BRD2	1833.94	975.375	2379.75	1917.26	1095.8	1168.77	2233.48	1635.88	1398.22	1298.57	1403.97	2024.13	1532.66	1840.57	1326.39	1554.08	1382.29	1478.33	1525.38	1598.17	1608.12	1408.02	1554.08	1678.36	1521.95	2519.68	1221.4	1267.51	1410.9	1628.84	1979.77	1599.5	1432.13	1408.02	1645.19	1436.98	1114.81	1494.62	1921.38	1361.28	1528.33	2425.22	1585.87	2137.27	1957.11	1481.27	2047.52	1957.11	1249.18
BRD3	421.871	356.048	663.787	482.869	464.115	358.84	392.402	508.262	526.267	563.117	423.587	460.009	477.877	609.235	331.815	532.331	317.298	825.062	470.583	438.826	776.352	677.53	525.481	368.887	467.086	412.208	330.322	574.261	655.168	535.416	400.414	378.345	581.287	381.51	500.653	416.308	365.146	443.828	569.715	355.927	363.77	385.262	427.025	578.805	615.265	340.392	527.995	492.679	499.684
BRD7	230.027	189.461	330.699	226.891	265.739	306.051	146.226	258.429	281.188	241.274	302.294	216.019	272.736	265.546	235.725	231.313	191.654	225.476	217.187	263.817	247.75	213.015	276.789	236.469	225.091	169.851	190.42	303.499	250.258	227.875	268.027	215.788	262.226	209.742	233.952	215.627	332.718	284.226	196.593	179.354	257.122	223.579	223.42	181.093	191.092	177.993	189.168	205.703	259.704
BRD9	450.888	444.877	495.013	410.716	454.701	290.989	500.574	408.082	350.779	373.664	324.18	448.113	472.134	502.758	361.609	267.649	329.038	351	391.245	442.447	380.674	388.922	458.037	363.064	468.253	552.519	447.724	323.948	299.07	638.185	593.726	455.679	340.993	359.329	466.274	375.526	334.022	415.235	376.823	407.464	357.576	445.144	448.471	560.135	504.404	401.685	488.661	512.176	295.523
BRDG1	61.8751	46.4562	92.7591	94.8282	137.47	226.808	14.7716	122.326	53.5118	58.4183	49.0656	57.8076	125.78	41.0521	66.6096	78.2385	22.7555	56.8098	90.6139	93.2671	78.5902	113.749	88.5641	103.631	47.4494	57.0751	135.555	46.7099	13.8602	56.4224	67.1904	90.0268	69.3771	87.8172	27.4064	60.173	51.6108	42.4822	7.64233	22.5894	40.8811	15.4978	60.7404	36.6788	20.3688	97.0121	6.79016	19.7892	37.4967
BRI3	2417.96	2111.13	2344.05	1510.42	1198.65	2810.08	2689.96	2060.65	2060.65	2246.17	2963.13	2584.98	1998.22	2455.24	2270.89	3621.68	3994.4	2274.04	3328.79	1986.53	2165.04	2147.84	1756.34	3164.16	1877.01	2264.59	2528.26	2824.42	3188.66	2957.22	1964.73	1831.64	2486.87	3638.7	2224.07	2414.83	2024.13	2063.84	5804.34	2704.03	2024.13	2916.79	2145.44	2208.87	3308.07	2730.64	3083.79	2843.72	2425.22
BRMS1	142.419	113.995	110.09	146.269	152.698	149.587	178.025	130.958	116.105	147.451	184.911	170.996	135.21	153.652	158.56	137.716	169.069	148.452	101.574	133.401	162.092	159.172	120.934	100.886	131.789	165.696	145.222	95.247	165.031	170.286	154.858	157.54	130.274	205.497	135.16	158.111	176.36	144.489	269.133	163.169	158.691	252.871	150.089	197.577	208.953	143.798	189.044	218.92	160.094
BRP44	521.385	546.236	700.687	615.265	441.328	668.354	639.831	574.67	663.097	681.765	482.63	614.251	459.822	460.407	685.954	686.399	558.016	779.319	605.708	586.369	638.707	644.988	652.45	657.337	657.719	497.32	579.467	726.537	555.342	393.951	417.573	652.834	727.285	893.638	572.401	533.769	1598.17	505.733	439.622	661.464	618.959	603.432	457.437	453.52	467.779	419.403	578.221	523.751	853.689
BRP44L	245.485	180.786	311.062	266.29	255.585	413.824	256.114	290.173	237.085	289.467	405.088	226.727	293.45	334.806	412.208	239.223	230.366	196.466	212.295	250.434	286.515	274.064	259.886	212.295	284.939	273.638	245.919	220.758	244.352	235.553	317.826	253.623	223.038	228.654	275.712	249.34	229.063	332.871	252.801	213.346	344.55	272.827	276.789	250.995	303.62	245.659	274.373	245.826	270.411
BRPF3	557.682	502.07	369.043	381.193	502.281	301.84	326.118	352.927	383.989	374.542	221.965	447.365	497.796	372.796	493.59	396.418	418.42	440.863	294.365	537.335	356.757	351.26	413.296	443.636	366.107	361.073	398.23	364.688	476.739	463.226	361.755	535.697	469.334	511.944	553.546	496.123	566.462	449.188	419.237	361.555	423.974	337.178	418.847	348.728	494.981	460.407	475.391	445.258	445.018
BRWD2	201.196	160.817	255.675	210.693	307.505	166.415	181.093	204.161	276.982	310.95	289.94	276.982	247.574	248.793	221.438	153.062	166.692	222.899	145.693	217.639	269.02	269.328	134.59	155.075	269.225	191.526	175.756	186.426	202.803	317.546	234.946	233.109	174.583	210.977	197.966	173.004	154.716	218.704	236.801	89.4233	184.589	168.863	215.936	310.703	216.696	164.961	259.886	241.433	118.108
BSCL2	460.204	485.344	211.478	397.753	352.927	352.292	581.287	404.558	365.479	334.551	330.077	391.488	404.558	373.106	463.432	270.312	502.808	282.411	323.266	373.909	333.831	296.154	160.86	263.726	452.262	524.096	491.093	407.225	506.978	512.191	492.169	440.25	450.149	373.442	372.486	281.412	490.087	453.316	505.256	527.995	378.712	391.317	439.015	473.962	547.641	1124.96	595.36	617.955	285.375
BSDC1	568.206	922.398	748.549	715.52	645.371	773.419	632.484	757.91	694.429	698.143	472.201	698.954	650.12	753.97	578.498	923.729	751.302	683.936	816.925	661.863	627.613	702.445	625.178	801.852	530.198	687.678	757.91	906.31	585.167	656.93	695.165	506.486	637.941	629.659	555.608	758.417	865.272	466.664	827.795	650.438	543.25	714.675	858.748	776.352	738.504	766.792	706.072	651.383	585.502
BSG	651.573	2614.99	818.188	1795.53	1733.64	1706.4	1370.01	1365.88	4066.24	4968.74	843.878	1976.41	996.125	351.812	1195.2	1720.42	588.436	3293.22	1844.84	1162.11	1647.69	1800.42	655.152	2219.1	1440.81	529.805	979.589	2200.55	667.487	920.237	162.832	3378.13	1031.2	3387.72	979.931	633.631	5583.44	1135.62	1651.81	1198.36	1042.35	1071.09	922.719	2294.81	753.922	673.312	1306.32	1329.88	910.761
BST1	192.634	124.394	207.93	183.702	99.1838	100.849	292.667	157.581	163.854	160.391	288.608	209.888	122.985	237.354	201.918	373.268	467.534	174.469	141.087	181.275	125.942	109.837	201.792	176.311	185.132	148.143	250.631	217.187	279.636	184.277	105.706	177.59	204.635	206.669	148.431	255.397	106.619	185.132	307.265	271.916	256.786	238.457	143.658	167.072	373.74	194.526	338.841	372.486	261.922
BST2	612.629	464.342	593.688	584.534	433.29	579.773	1072.79	909.423	792.597	743.032	1611.65	902.583	545.673	1602.81	557.682	584.534	715.957	521.911	664.226	540.422	592.116	593.688	436.429	596.003	872.509	1236.63	916.588	597.34	845.964	1146.06	1223.75	704.512	741.584	538.181	560.811	615.938	919.201	966.496	717.277	562.011	661.464	970.092	810.519	899.015	1030.6	773.419	862.217	878.461	921.218
BTAF1	205.914	215.714	428.031	335.368	253.349	559.293	175.81	482.435	314.213	285.928	187.997	132.931	262.837	269.742	240.917	318.442	130.669	277.185	345.767	281.801	224.071	233.109	404.353	357.961	206.037	194.989	175.042	525.481	469.334	136.559	279.395	243.133	379.213	212.875	265.445	202.053	149.552	205.195	138.942	196.211	195.623	119.964	172.846	127.641	122.401	161.283	117.13	126.138	242.703
BTBD1	136.516	111.416	271.383	155.875	202.192	252.05	110.615	162.252	162.402	181.764	218.905	113.355	182.413	117.408	184.605	106.111	95.929	125.875	114.357	176.593	168.193	169.415	230.748	119.114	139.23	108.657	110.915	134.676	131.263	116.541	140.364	138.246	150.67	121.351	163.058	160.868	131.159	163.126	88.2615	84.859	144.543	119.785	117.518	98.8839	111.705	127.717	100.979	92.3259	121.752
BTBD10	451.435	336.591	458.037	458.483	454.6	385.104	410.583	489.868	457.811	461.31	601.999	395.256	404.74	500.653	581	619.687	513.823	435.256	434.288	557.057	399.93	489.868	832.111	363.146	408.43	360.935	386.232	557.387	579.467	377.223	375.492	392.402	579.773	419.403	423.168	820.166	363.146	467.779	486.832	544.539	553.803	346.201	304.572	226.502	314.458	344.124	315.151	344.418	660.357
BTBD12	319.754	227.074	261.031	277.726	242.201	92.0535	286.402	166.103	178.76	166.528	221.588	222.816	232.312	254.922	227.074	135.192	178.699	145.988	143.302	194.66	165.887	167.576	199.888	166.255	259.232	291.186	221.965	164.106	153.343	342.7	348.316	222.331	182.387	164.331	248.624	223.038	187.374	232.77	222.899	375.181	197.133	207.298	263.249	218.232	256.483	218.163	189.461	217.187	254.671
BTBD14A	243.133	133.711	263.337	144.208	135.816	48.9549	322.137	139.803	110.466	117.168	316.947	224.551	146.568	325.863	242.603	325.46	259.988	211.946	162.188	163.59	119.372	130.288	450.375	143.617	274.875	208.296	123.419	97.0707	318.057	532.331	180.085	120.311	197.133	149.509	162.027	599.207	98.9664	177.478	217.879	315.267	198.157	258.981	176.612	178.442	252.389	169.738	295.46	282.807	295.69
BTBD2	1510.42	2099.42	682.162	1633.92	1322.43	1323.88	1158.98	1128.57	871.956	883.926	987.631	1219.32	1760.18	1293.39	1227.8	868.986	1266.33	812.211	1277.81	1354.69	1145.14	1113.86	729.282	1053.09	1280.1	1164.79	1688.14	975.375	867.225	1826.98	1576.07	1353.7	1179.06	1076.83	1589.39	990.362	948.397	1172.69	1156.03	1105.97	1303.33	1079.34	1663.9	1435.89	1416.59	1765.8	1258.88	1355.92	955.734
BTF3	1009.6	1488.58	877.827	1745.17	1715.15	902.583	2134.16	1162.05	1645.19	1686.24	917.862	2221.28	1406.66	1198.65	1162.05	527.066	985.426	1557.45	944.188	1248.14	1083.72	1094.27	1033.64	1007.92	1537.91	1601.18	1282.55	872.509	848.727	1741.11	772.42	1512.17	1481.27	1264.97	1528.33	1373.67	2512.8	1532.66	902.089	1264.97	1947.19	1947.19	1276.61	2142.91	1229.68	1083.72	1613.14	1599.5	1127.52
BTG1	8661.95	9569.92	10031.6	9731.52	10915.9	8862.19	6084.23	8393.89	9417.09	9129.05	9167.87	6436.24	9872.88	7163.16	8818.72	13242.5	8506.43	7687.31	9828.77	9038.94	9872.88	9731.52	8910.79	10122.3	7599.56	7381.82	8910.79	7599.56	7187.35	6625.08	8862.19	9928.79	8023.43	8124.29	10499.2	9513.95	6857.43	9258.7	4171.22	6025.13	9464.96	7135.6	8950.71	7238.77	6760.51	8055.38	7381.82	7135.6	8862.19
BTG2	1018.94	704.957	677.917	896.453	833.168	1670.94	779.319	838.049	853.689	984.727	689.263	802.866	624.686	698.551	862.792	1045.85	1098.24	634.802	1158.02	833.168	708.29	646.128	838.049	964.302	621.693	523.017	571.488	492.434	665.451	715.957	806.362	750.004	832.111	1007.12	996.582	1190.01	658.502	729.282	1246.9	563.424	861.683	844.361	539.569	762.449	674.766	629.313	745.816	756.405	665.861
BTK	1223.75	740.028	730.598	1219.32	1416.59	1293.39	1035.93	1402.6	800.856	935.887	1281.28	1075.27	1253.41	1275.4	1389.06	1125.74	1018.13	940.821	987.631	1061.3	734.065	812.211	1064.59	1182.18	1319.8	1213.66	1095.8	1220.24	1462.27	986.927	1105.15	968.667	1283.6	829.498	903.906	804.77	823.52	935.887	697.722	1060.47	1039.44	877.827	556.776	915.25	1139.51	828.328	835.934	858.748	1132.17
BTLA	69.3288	79.1864	101.641	86.1828	151.59	218.475	83.141	104.211	101.218	98.7732	82.0683	127.521	161.127	79.0944	88.1078	97.4982	73.8353	116.165	93.1236	112.617	109.209	103.915	98.1388	78.2922	84.7589	106.006	123.985	43.475	37.0626	214.464	133.015	140.902	106.943	110.874	79.5922	126.296	65.8976	105.239	76.0618	70.5128	68.2716	120.092	78.7167	145.851	134.256	110.466	114.588	79.4649	55.789
BTN2A1	402.183	405.945	388.167	383.132	427.896	327.33	345.115	358.151	522.404	495.221	494.484	402.481	335.892	455.256	447.027	493.999	388.503	551.166	356.212	428.986	443.512	495.244	474.023	441.742	349.452	317.52	364.106	372.857	413.324	376.881	322.503	437.331	383.6	542.983	297.435	587.749	435.982	394.315	408.275	350.524	415.092	470.891	345.144	287.97	355.767	318.594	360.011	362.42	566.017
BTN3A1	266.973	357.115	206.035	370.934	336.845	272.977	287.92	312.831	504.905	422.422	622.824	286.251	237.455	352.019	248.527	329.116	153.614	442.232	243.959	274.416	353.791	306.815	167.559	332.717	374.18	324.304	269.519	380.922	255.176	325.887	389.169	476.479	236.43	307.015	250.631	329.386	433.144	424.198	203.059	243.231	271.302	386.978	453.658	315.588	327.811	355.654	311.345	278.619	484.881
BTN3A2	700.33	1335.26	858.265	1394.38	1158.02	902.089	645.371	1019.66	620.728	619.687	1184.3	378.345	1080.2	1177.87	484.592	899.66	556.491	770.44	1217.02	583.237	989.708	903.17	417.573	1309.53	1171.43	830.567	868.986	1180.08	731.466	462.253	915.938	846.583	849.202	804.77	525.216	629.992	1103.5	850.816	684.72	366.107	949.629	614.251	1134.94	669.743	472.992	965.203	419.035	446.16	758.417
BTN3A3	288.537	438.44	313.649	326.795	387.749	465.312	293.496	306.808	290.995	319.43	544.902	186.95	305.776	415.671	242.9	200.812	172.708	290.904	237.682	242.602	252.182	270.584	188.756	222.062	342.42	375.549	286.24	242.308	187.651	307.354	487.984	384.551	229.266	228.128	200.516	373.008	464.025	327.639	203.719	214.788	294.848	459.417	359.411	302.031	276.362	320.925	274.993	294.073	351.541
BTNL3	40.2034	-3.76181	-6.13168	28.4054	23.094	15.2289	30.4894	-1.16052	-3.99469	-4.36009	55.4799	40.3042	-4.62849	65.0003	-1.37988	66.3559	-3.34757	63.8793	-2.1445	-5.79229	14.9335	15.8525	52.7086	6.2707	-2.94687	35.6819	-0.0152767	-1.3253	38.2769	17.779	-3.09455	-3.54124	34.0491	86.2421	-1.43279	-3.68452	36.6402	-4.83336	-2.03817	-0.892525	100.639	-2.89133	23.5758	26.1887	35.9984	86.836	-2.76144	-1.13253	-2.98702
BUB3	1036.75	1174.01	893.134	1311.45	1398.03	1154.94	814.158	1089.38	1078.91	1047.01	888.198	992.347	1146.5	1030.45	959.461	647.698	580.23	870.616	975.15	1218.39	1158.75	1136.97	780.118	1088.1	1176.11	966.564	904.915	875.685	652.882	1144.05	1379.06	1275.85	884.408	763.794	1144.46	975.571	687.823	1105.77	595.367	728.998	871.493	1212.96	1106.01	1226	1086.6	951.9	858.985	898.117	585.565
BUD31	917.207	1396.88	975.375	1108.54	878.461	1487.19	1073.71	1004.48	1036.8	1018.94	1113.86	1014.96	910.552	1183.38	1084.74	1906.09	1557.45	1070.37	1365.36	897.706	1135.75	1319.8	1021.24	1315.99	991.074	1132.17	1447.25	957.86	1045.85	937.036	1115.7	1184.3	1016.42	1491.52	1205.76	942.133	1284.84	992.509	1368.14	1174.69	1124.13	1181.15	1313.31	831.102	1021.24	1515.5	1007.12	1040.24	1213.66
BXDC1	294.365	259.425	231.408	288.91	277.089	462.743	181.511	254.409	233.692	242.514	302.758	238.625	337.705	194.59	236.395	198.22	168.814	210.264	364.528	247.574	289.821	291.991	205.703	348.891	292.552	239.754	267.21	209.594	171.701	214.394	273.136	359.764	167.627	181.949	285.167	114.629	172.374	282.07	98.8331	161.493	241.59	154.53	289.13	211.607	191.031	322.272	184.772	179.23	141.047
BXDC2	338.672	336.015	317.684	371.863	390.213	570.31	228.104	336.428	328.189	386.57	318.826	296.856	427.658	295.69	321.771	277.625	180.541	299.639	377.836	360.22	366.513	405.808	287.812	372.796	291.531	322.017	339.982	277.439	234.107	254.922	385.749	365.64	300.786	253.82	334.677	231.898	222.816	378.519	137.799	192.02	316.067	323.159	339.112	239.843	231.744	335.224	235.389	186.236	141.419
BXDC5	124.663	139.226	230.289	136.596	133.237	222.267	99.4582	143.617	113.223	100.451	137.01	71.3508	100.951	149.415	110.934	167.072	128.608	91.4863	234.395	130.34	111.644	109.317	184.644	213.282	114.23	136.049	147.393	132.122	144.788	102.204	143.798	153.288	131.175	143.217	104.211	87.3391	79.0379	145.198	61.2735	95.279	127.73	81.4668	119.486	46.5225	70.6616	116.64	42.6516	55.931	94.7974
BZW2	182.793	223.822	225.634	227.777	211.478	259.058	168.96	278.782	223.984	253.623	206.669	211.256	226.331	204.224	176.133	250.631	129.968	152.572	263.726	221.965	231.898	279.817	153.343	270.914	183.702	157.688	212.675	274.064	188.507	170.151	240.565	223.497	210.128	298.49	179.775	149.6	205.195	237.354	152.956	136.224	178.213	162.347	199.521	226.891	218.552	188.826	153.875	166.476	131.808
C10orf104	205.493	220.845	455.648	226.808	190.715	326.644	284.334	386.57	252.202	248.355	167.288	172.671	249.858	223.906	134.086	296.754	158.349	226.331	346.803	244.439	224.369	298.96	529.033	384.635	236.326	255.494	291.991	407.727	300.228	176.74	233.028	238.013	392.02	304.936	251.528	176.792	262.837	187.624	129.8	254.671	230.816	189.521	262.674	187.427	137.971	237.265	151.178	177.478	191.395
C10orf128	67.883	94.8282	211.805	84.0741	154.579	108.985	105.082	152.087	113	97.7702	105.239	121.977	91.7737	141.458	112.864	40.9703	68.7061	35.2948	61.7394	119.013	94.1434	94.4407	107.902	50.7874	192.931	147.777	134.882	34.2609	65.6432	106.943	103.975	130.877	108.79	100.951	104.465	143.386	94.5505	126.45	76.5613	42.4133	104.834	117.13	91.1098	176.55	178.938	224.633	161.586	142.83	95.9578
C10orf137	205.054	213.346	293.674	211.478	252.801	230.106	166.528	219.245	163.995	168.115	153.443	124.094	217.05	224.369	190.089	240.078	164.211	182.495	239.669	219.318	173.109	170.807	253.349	279.537	206.883	198.288	160.76	288.042	231.898	157.289	245.919	222.732	231.313	215.185	199.67	192.805	144.072	189.762	101.449	168.754	181.628	147.344	186.036	118.507	122.985	203.059	105.844	129.356	202.999
C10orf22	168.009	129.222	288.042	153.151	149.685	181.093	126.996	216.978	153.244	165.569	198.038	153.062	179.296	153.288	173.446	151.635	87.7591	168.392	185.214	154.716	163.854	166.911	265.06	234.774	214.32	126.529	145.902	208.296	240.565	107.935	152.81	187.938	171.126	149.277	161.935	103.353	107.354	193.396	76.5366	101.385	135.887	99.7953	135.592	109.632	97.2309	137.562	82.1943	84.6509	112.049
C10orf26	224.221	211.329	368.588	257.939	307.619	201.471	285.477	259.511	284.428	302.758	293.674	344.294	255.935	293.241	306.385	200.153	227.54	335.78	111.644	275.293	304.07	322.52	370.387	119.372	200.03	192.321	170.904	194.133	296.973	375.656	295.363	206.099	323.756	368.887	315.01	446.16	284.012	250.53	456.832	262.553	313.359	309.182	211.805	332.718	288.181	196.083	410.583	440.25	289.59
C10orf28	166.528	123.828	202.667	173.056	163.132	72.6711	182.075	179.043	121.341	108.567	138.592	159.186	149.184	205.123	173.004	163.805	211.128	107.594	130.16	160.234	130.914	96.34	218.552	132.844	177.54	210.835	149.23	178.561	219.773	158.668	198.288	138.073	198.494	103.631	171.225	191.654	86.7715	174.759	185.35	232.691	165.32	162.137	170.752	203.352	171.335	143.256	187.035	176.026	226.727
C10orf32	241.675	199.452	284.633	169.899	210.335	227.461	233.863	249.772	265.445	249.772	270.816	289.355	250.434	206.312	246.947	158.979	171.126	230.2	228.247	216.482	307.73	324.004	214.595	203.427	312.102	266.29	226.183	193.461	250.914	227.461	238.541	241.857	186.903	280.122	300.012	175.232	184.53	398.602	280.968	127.818	283.694	343.227	213.585	422.988	250.345	217.187	376.198	363.635	180.305
C10orf33	171.638	154.768	60.7855	75.3784	216.696	76.5613	147.094	274.875	168.392	174.52	41.7783	109.317	109.837	159.906	92.2487	92.1829	41.6396	87.3391	171.29	145.988	151.69	140.671	41.3298	208.971	116.38	150.988	154.867	50.0711	37.2897	180.969	144.023	122.174	204.014	57.8076	119.114	82.7456	89.1594	95.2491	114.919	60.6217	65.7745	145.512	155.542	236.326	436.011	186.659	182.86	166.58	18.2131
C10orf73	127.73	162.288	66.3628	144.502	153.244	85.6424	192.02	291.869	114.107	92.8722	112.259	128.608	101.252	163.895	135.555	326.524	195.128	106.545	159.482	112.716	113.852	84.9032	126.91	147.595	150.743	203.562	185.536	103.154	266.015	121.416	139.317	166.255	202.483	109.57	209.815	160.336	76.0166	120.168	149.509	337.178	160.391	132.931	180.357	235.993	107.935	164.211	193.585	167.576	392.758
C10orf76	115.828	187.247	107.148	115.249	131.175	168.754	86.0264	142.654	136.694	131.046	143.982	127.488	138.196	101.284	101.671	177.766	108.112	120.092	203.955	111.982	135.632	126.061	103.727	202.553	131.089	79.0653	150.031	141.222	118.741	92.3092	96.34	150.938	112.539	204.573	128.163	62.4927	185.855	132.328	115.646	51.2756	136.009	96.7854	150.439	144.596	97.3997	158.823	101.81	112.683	129.558
C10orf97	215.034	148.624	298.042	205.566	223.822	171.225	152.763	224.551	188.951	147.344	180.085	114.55	219.618	158.622	222.966	289.59	194.871	183.427	169.234	227.312	177.075	191.724	279.537	219.245	201.661	157.239	157.581	285.375	249.34	131.424	182.387	202.133	217.55	153.288	238.71	187.744	151.23	208.296	93.2963	175.972	219.166	108.074	173.166	105.577	101.026	191.583	98.9956	108.718	216.555
C11orf10	3073.22	2863.25	2347.41	3864.03	2032.36	6965.92	4198.77	4496.64	3673.32	3694.3	3270.18	4657.01	4355.16	3966.94	3816.49	3300.99	3792.89	3122.33	4281.64	3724.97	4024.29	4331.3	2052.82	4090.53	3694.3	3949.22	4975.43	3443.74	3499.14	3800.7	4670.52	3724.97	3932.81	4331.3	3778.89	2055.45	2839.32	3258.25	3512.19	2584.98	3615.18	4703.56	5210.44	5822.75	5408.21	5227.23	5227.23	4846.55	2508.7
C11orf2	1213.66	1721.12	420.719	1340.79	1365.36	1894.74	1253.41	1405.29	1303.33	1235.31	878.461	1635.88	1344.57	898.394	858.748	1238.78	863.423	1537.91	1767.63	1095.03	1903.98	1771.7	471.747	1627.22	1224.71	1268.47	1456.17	1274.43	799.116	1393.07	1049.01	1271.17	1087.27	2290.03	1313.31	808.351	2066.65	1136.71	1502.66	982.451	1135.75	1566.56	1512.17	2094.02	1621.62	1197.68	1695.42	1549.73	688.503
C11orf46	161.683	225.022	219.773	214.177	219.706	290.531	147.69	185.789	270.716	301.209	155.204	160.391	241.95	171.638	172.118	119.895	115.02	361.755	110.582	212.753	332.358	380.238	199.045	114.954	197.133	218.392	213.09	172.178	142.553	136.882	234.774	178.442	137.235	153.631	196.992	153.875	102.458	226.574	63.7885	112.153	182.733	156.207	211.546	125.903	134.926	183.361	117.915	125.076	86.6651
C11orf48	557.387	407.055	350.393	547.071	419.584	394.422	748.103	525.481	476.016	473.751	589.949	714.261	507.466	618.959	530.723	377.223	604.083	414.029	365.815	531.528	552.122	449.953	365.64	426.466	770.44	702.445	594.39	388.699	467.086	713.417	774.83	651.052	438.245	482.435	520.824	474.947	395.772	718.51	713.417	542.025	632.484	954.995	703.679	914.582	991.779	687.678	843.207	862.792	541.233
C11orf56	315.267	284.834	219.618	257.563	286.515	188.241	389.204	295.363	359.913	361.555	325.46	393.118	327.411	382.02	342.249	528.49	463.226	433.515	260.534	266.195	312.102	287.353	233.607	296.856	252.097	282.07	247.836	343.968	371.542	529.91	256.295	295.257	340.553	440.438	254.671	473.495	267.517	278.677	1072.79	498.052	265.25	450.149	219.463	480.741	416.677	242.603	532.331	522.788	391.488
C11orf59	2161.88	2074.88	654.38	1543.31	1829.65	1225.77	1667	1434.69	1981.85	1941.48	1672.87	1592.97	2039.64	795.559	2009.27	1719.45	2753.32	1309.53	1529.99	1520.45	1775.98	1699.47	579.773	1204.66	1921.38	1166.81	2372.72	1257.92	1464.99	1467.93	1072.79	2344.05	1520.45	2150.54	2274.04	1019.66	2029.31	1879.68	1786.31	1340.79	2372.72	1901.85	2094.02	1856.21	2354.13	2347.41	2003.65	2114.21	1641.76
C11orf68	160.496	209.457	67.6463	153.443	125.287	197.322	109.209	198.038	168.063	169.851	129.399	159.584	117.491	129.309	119.076	297.455	206.519	196.405	271.43	119.114	182.323	147.916	93.6667	240.401	134.175	113.114	181.398	151.178	226.25	150.49	111.982	166.853	160.611	242.514	150.542	95.3954	205.566	165.674	237.354	98.5939	133.585	132.505	192.805	129.057	168.96	198.957	164.331	147.393	151.99
C11orf75	641.148	556.776	538.465	755.49	593.372	603.093	1093.46	639.131	600.439	633.147	5029.02	590.255	682.162	858.748	861.023	816.474	987.631	667.621	584.867	526.551	1108.54	1104.38	332.718	433.724	1242.16	897.081	918.537	584.238	1299.72	576.407	544.539	723.902	835.411	658.827	900.859	384.141	736.729	1141.39	1132.17	998.07	959.131	651.383	604.745	455.455	745.304	779.874	820.648	855.427	1355.92
C11orf79	1195.8	1005.75	1520.45	1478.33	1228.77	661.464	1727.04	1033.64	851.894	776.815	1395.65	1475.39	1409.48	1531.43	1438.46	1236.63	1518.76	853.689	967.262	1395.65	946.917	803.852	1693.47	957.86	1330.14	1751.77	1357.06	764.775	1030.6	1822.41	1647.33	1260.28	1074.48	891.825	1096.65	1684.1	978.755	1352.37	1394.38	1489.94	1207.99	1711.56	1361.28	1635.88	1921.38	1365.36	1888.19	1798.22	1161.09
C12orf10	738.504	774.297	670.881	937.601	875.35	457.61	1678.36	740.028	693.668	753.529	601.028	1410.9	670.146	674.766	811.562	597.956	727.285	725.643	696.908	656.559	661.027	593.372	618.279	647.346	944.188	1196.64	869.604	518.24	567.356	1494.62	865.272	903.17	757.39	922.398	824.077	1050.03	1549.73	897.706	1045.85	980.234	808.351	1196.64	680.602	1703.6	1111.84	788.222	1460.61	1339.56	816.474
C12orf29	157.239	176.612	130.119	187.247	158.463	151.28	90.5607	153.875	178.331	205.268	127.274	96.4922	176.965	99.7953	138.801	114.782	50.82	167.627	150.388	188.697	191.965	222.132	149.738	168.912	157.441	97.8296	140.358	212.02	76.3338	59.0778	115.762	208.505	121.23	163.539	196.593	75.2914	131.34	151.546	27.5474	91.5585	141.594	101.575	144.45	86.1828	76.7108	104.669	65.6905	65.9601	78.9389
C12orf31	157.904	41.4214	222.899	114.588	114.194	229.293	75.6209	139.753	94.9764	94.1097	153.687	120.625	98.3364	160.715	131.519	167.576	84.4479	117.882	243.379	114.711	90.8784	105.877	258.981	221.346	156.788	72.6267	100.322	140.583	175.81	57.3613	129.356	144.401	151.28	104.109	109.024	68.3153	112.823	185.403	158.823	91.1098	180.085	149.829	93.4741	51.7733	108.946	69.9316	108.681	86.7965	137.284
C12orf35	1699.47	1432.13	3994.4	2158.67	2828.52	1660.32	1128.57	1551.03	2212.25	2326.88	2447.84	1417.97	2350.63	1549.73	2287	2300.37	1867.32	2280.13	1016.42	2425.22	1509.27	1864.93	4385.86	1389.06	1549.73	1672.87	1318.62	1473.93	2372.72	1207.99	1445.92	2145.44	1630.58	1068.91	2490.14	2470.68	1885.74	2006.73	1174.69	1505.86	2215.63	1408.02	1232.97	942.133	952.229	1348.29	1489.94	1491.52	2775.29
C12orf41	753.97	675.188	1114.81	825.062	877.827	585.502	742.574	730.074	657.337	694.429	612.235	697.722	832.629	803.362	676.787	559.293	462.474	611.22	739.016	782.253	733.643	677.917	983.21	635.809	691.212	807.392	594.051	588.311	597.956	927.056	849.73	751.302	550.411	534.599	868.347	807.392	487.065	883.926	469.334	597.044	718.111	717.666	697.722	920.53	655.85	661.027	753.529	683.06	527.416
C12orf44	157.993	151.084	85.3598	138.15	111.318	217.482	210.758	183.702	140.448	129.14	159.968	191.156	122.244	186.903	119.778	154.916	130.764	129.26	234.25	134.971	161.44	166.476	74.8257	235.553	155.018	193.645	174.868	139.9	142.873	204.498	192.679	175.909	142.873	195.264	140.671	112.259	145.693	151.23	238.195	110.613	137.971	234.543	193.917	229.868	202.329	174.073	171.824	190.485	109.8
C12orf46	193.461	155.751	160.496	124.427	213.015	127.274	208.234	165.103	145.34	174.759	133.457	208.776	161.233	225.253	191.965	228.407	183.593	128.65	250.53	211.329	122.985	151.28	320.592	222.966	203.562	282.525	176.55	211.666	160.133	84.8354	239.754	184.644	136.009	142.044	153.393	265.445	140.627	151.039	168.96	224.135	153.486	229.868	230.366	169.899	159.968	191.342	149.738	158.138	173.662
C12orf47	823.52	636.188	724.828	925.749	625.494	764.314	810.519	780.361	652.106	685.538	591.831	529.615	966.496	1038.06	757.91	688.503	653.681	454.39	850.816	811.064	703.271	668.354	620.337	725.301	861.683	1122.52	819.173	653.681	538.465	735.316	1005.09	772.42	639.831	475.391	705.308	477.64	397.37	760.366	521.615	583.946	620.337	627.94	881.852	836.486	709.587	884.585	581	573.758	534.307
C12orf52	139.317	146.869	149.373	96.7854	129.519	137.562	184.892	135.012	118.064	107.835	112.963	159.223	125.36	155.542	135.964	113.183	133.831	85.2321	116.878	116.165	116.917	107.935	144.253	106.723	125.855	192.679	142.172	110.032	95.5143	252.59	256.876	152.368	127.374	104.868	110.841	164.331	109.1	135.365	139.269	145.939	105.476	167.016	221.438	199.255	211.19	222.661	198.099	192.088	82.2211
C12orf57	1131.24	1036.8	486.352	1112.79	619.316	1068.03	1035.24	1071.97	1015.6	995.069	429.021	935.199	1139.51	992.509	734.883	692.42	519.048	680.602	1378.13	758.417	1289.62	1222.57	395.772	1294.73	1040.24	1867.32	1345.81	727.637	316.816	1022.82	1426.1	1499.61	767.183	1541.66	1058.87	506.246	597.664	980.946	669.044	829.498	825.062	1169.58	1403.97	1496.14	1261.39	1067.24	1003.74	977.368	378.712
C12orf62	295.46	175.296	192.867	286.034	146.82	187.315	348.728	284.734	222.132	175.166	283.591	233.178	259.606	277.089	265.06	231.663	259.058	199.888	236.801	222.488	281.088	181.766	146.382	243.55	315.151	379.359	274.662	218.02	294.564	292.124	313.85	329.527	254.124	297.792	311.868	141.087	132.844	310.207	202.265	248.524	362.976	278.172	300.786	271.916	285.812	285.812	243.462	235.725	217.719
C13orf18	463.874	327.411	225.476	193.128	278.382	286.15	241.433	267.311	384.298	351.866	98.5015	397.37	280.34	363.457	393.618	911.642	761.127	504.297	317.684	475.151	210.758	243.619	377.527	425.847	262.12	315.918	367.78	204.224	417.386	484.109	235.553	444.803	441.545	356.917	419.237	806.881	375.841	486.352	374.055	423.587	500.146	240.476	305.696	220.99	213.502	551.213	337.986	281.885	461.546
C13orf23	199.391	233.692	187.113	247.836	256.95	308.436	83.0586	190.217	218.704	218.098	231.233	144.746	250.722	148.803	182.323	176.077	155.7	204.918	212.148	230.974	223.984	272.029	188.114	227.074	227.943	103.546	199.452	240.322	145.198	122.015	183.427	266.937	133.015	240.917	266.195	129.89	261.396	191.277	111.114	96.811	173.004	122.132	195.501	147.499	105.153	208.143	122.365	95.0062	184.837
C13orf27	90.2652	123.536	185.665	90.0268	136.138	218.163	85.2075	199.045	104.465	115.939	99.3999	50.191	105.374	127.037	79.6406	115.939	36.8883	104.465	138.458	128.123	78.7682	110.708	99.1557	159.968	117.275	96.4624	102.098	125.445	68.2716	86.1312	105.949	135.727	148.143	104.437	112.93	54.0722	43.5127	112.93	21.7768	78.6395	91.0224	50.0133	105.675	61.1399	79.4394	135.365	49.8092	47.0578	53.5606
C13orf8	239.415	249.699	98.241	181.16	229.763	215.858	98.3364	203.697	239.59	240.729	211.74	183.24	229.371	108.049	157.738	205.493	174.301	274.565	233.028	167.468	285.042	308.436	95.096	254.487	246.436	108.216	231.408	227.608	176.55	97.8029	102.723	265.739	168.166	309.182	241.274	89.9164	224.943	217.639	139.028	129.093	212.951	113.66	244.901	151.504	160.92	247.224	121.608	119.309	212.528
C14orf100	375.841	329.92	546.808	367.78	405.988	523.751	335.368	390.793	372.796	381.365	586.369	340.7	338.397	399.93	439.622	548.2	469.334	327.411	484.592	376.866	339.552	388.699	559.899	491.093	413.296	288.394	336.736	428.394	474.696	254.319	363.146	391.11	349.674	494.542	375.181	523.017	292.327	472.707	293.122	449.551	424.184	348.025	318.681	186.533	240.729	382.853	238.541	241.59	513.265
C14orf102	488.707	189.583	328.468	451.236	122.521	349.482	518.24	455.648	555.608	637.287	389.514	329.367	485.618	397.37	464.72	281.608	643.529	839.266	384.298	486.604	553.261	621.985	348.601	351.12	393.274	402.376	556.491	507.749	499.684	246.289	287.588	387.809	391.317	334.551	515.348	256.483	298.271	333.692	229.293	462.973	542.025	335.368	626.246	355.026	327.009	601.999	459.146	462.07	525.998
C14orf106	495.447	580.648	1043.54	616.679	588.002	803.852	582.234	796.105	634.802	741.584	568.206	615.265	595.042	453.52	629.313	795.07	560.532	625.845	555.608	536.562	608.799	779.874	846.995	613.871	617.955	462.474	510.332	850.816	667.302	341.402	430.856	457.811	654.38	703.271	576.161	551.499	596.003	524.342	338.672	421.644	523.251	498.686	542.632	466.421	412.751	591.831	438.016	439.015	617.019
C14orf108	292.768	223.984	373.106	286.84	377.377	355.385	164.653	280.968	330.441	357.236	416.109	239.047	306.912	242.446	346.368	270.605	273.349	246.947	271.134	350.238	341.534	316.694	413.097	274.978	284.226	231.815	220.669	255.494	325.863	200.03	230.974	284.939	268.907	278.382	280.34	306.281	306.912	334.806	200.303	272.029	291.869	229.063	192.931	205.35	258.21	223.195	184.589	212.085	300.448
C14orf11	654.38	625.178	999.012	719.719	601.326	736.729	567.936	679.703	656.559	710.48	700.687	573.072	673.497	712.607	646.128	771.882	595.36	489.194	727.637	606.304	635.162	624.013	1103.5	802.866	513.542	586.07	589.524	567.936	663.787	551.213	661.464	641.148	603.093	521.133	538.697	677.53	487.322	716.427	509.002	588.311	611.886	598.313	504.014	446.712	554.377	492.434	560.532	627.613	741.008
C14orf112	494.981	458.253	417.753	536.562	437.033	684.354	491.714	464.931	494.981	552.45	564.011	663.437	547.352	529.615	427.454	389.701	436.204	331.429	477.877	468.252	550.673	559.595	370.732	566.462	606.304	477.224	638.707	340.132	381.057	562.011	594.716	664.226	375.017	541.233	455.067	341.842	438.016	475.804	344.985	321.771	568.483	552.45	654.045	700.33	641.148	577.018	619.316	571.167	274.875
C14orf129	359.135	314.876	448.797	343.968	467.309	327.675	307.619	255.845	356.583	314.734	451.435	424.184	353.943	257.122	543.25	426.258	438.016	249.34	263.141	438.245	310.207	285.812	656.93	352.764	414.19	310.315	304.936	348.316	344.294	247.574	265.739	400.089	311.062	308.553	493.795	495.447	335.515	353.666	332.871	374.848	340.132	411.312	290.173	324.004	278.481	274.286	386.232	415.151	441.092
C14orf135	240.917	323.266	279.082	271.916	453.114	286.617	159.906	234.466	235.725	262.325	201.263	252.801	283.049	182.668	261.696	308.661	287.812	240.823	243.619	280.968	254.767	280.852	283.694	250.345	252.3	208.234	294.564	239.916	165.887	152.467	228.801	280.759	176.311	225.171	282.936	240.244	262.674	228.654	151.795	193.189	263.249	263.249	274.286	210.631	190.089	215.936	216.182	191.773	229.435
C14orf138	495.211	265.15	481.279	270.716	383.311	282.807	349.345	311.163	382.161	412.408	373.268	361.755	352.764	349.198	389.043	438.826	470.583	312.861	305.545	428.394	297.926	319.224	892.442	254.922	365.337	343.678	243.706	315.151	332.594	297.926	268.42	338.841	350.238	281.52	413.648	617.322	285.812	369.807	412.751	567.679	394.248	286.515	203.124	253.255	244.069	321.106	327.009	352.292	484.592
C14orf142	223.038	177.644	229.513	188.114	182.975	258.697	137.332	172.846	142.78	155.119	231.148	115.173	213.214	147.393	199.324	201.471	137.704	133.326	224.467	193.849	170.369	204.224	219.1	239.139	199.192	158.876	176.026	204.498	191.092	127.374	187.315	237.354	140.124	229.144	186.976	141.703	151.947	256.031	78.4433	144.023	217.332	120.311	136.64	74.2408	113.923	168.754	86.0759	113.884	145.013
C14orf156	1432.13	558.97	841.535	1018.13	472.201	1928.7	927.056	1231.98	1117.73	1172.69	1215.95	867.225	1256.78	954.386	1071.1	882.586	995.886	884.585	1833.94	945.568	1177.87	1403.97	793.455	1544.74	1406.66	871.956	1327.78	970.769	986.172	702.445	1142.38	1403.97	987.631	1210.34	1129.49	479.328	726.537	1074.48	632.779	634.802	1272.32	870.831	1046.6	946.282	1054.7	1246.9	814.366	917.207	902.583
C14orf159	1151.16	1166.81	1007.12	1549.73	1420.77	1016.42	839.772	1070.37	1275.4	1362.63	1691.74	1509.27	1462.27	1910.5	1471.05	1641.76	1592.97	1509.27	1254.47	1393.07	1194.65	1349.86	929.091	1311.85	1416.59	1308.32	1161.09	1095.8	1921.38	1045.85	904.529	1016.42	1362.63	1232.97	1282.55	1579.07	1661.85	1448.8	1084.74	874.854	1211.55	1427.71	1382.29	1035.93	1027.57	1181.15	1353.7	1422.2	1701.32
C14orf166	718.868	994.41	677.146	661.464	837.01	1273.4	516.159	755.927	538.181	565.801	639.466	389.514	827.159	692.041	812.211	676.787	677.146	454.833	962.129	702.862	796.105	619.316	584.238	803.852	737.204	607.168	978.081	803.362	654.732	447.739	779.319	786.247	576.735	731	698.954	345.902	607.491	764.314	295.949	452.084	714.675	340.7	878.461	332.871	421.096	1034.38	294.365	286.84	469.584
C14orf2	285.375	214.595	320.984	272.323	180.593	253.523	322.272	297.228	181.398	176.428	230.974	328.059	281.188	304.07	326.89	275.184	328.724	166.735	376.866	208.505	194.462	191.833	244.352	317.546	297.09	238.541	287.233	262.674	370.247	262.933	284.734	287.353	308.186	306.281	202.197	180.715	202.133	253.82	334.551	224.633	270.816	297.455	233.692	258.609	330.699	261.488	290.173	268.72	225.705
C14orf32	358.84	382.52	282.411	374.367	382.853	508.262	233.524	343.519	338.841	368.739	396.575	365.146	395.426	301.445	353.666	377.836	313.602	461.827	328.861	370.247	481.744	530.975	256.295	377.377	399.431	219.998	340.818	332.594	330.077	294.564	281.088	361.555	330.578	401.292	379.81	289.703	379.675	366.806	323.385	229.435	444.044	294.256	280.237	354.258	274.875	304.697	328.861	283.591	339.112
C14orf43	391.488	273.424	408.069	341.134	361.555	280.563	265.343	338.964	359.446	362.661	351.695	303.499	334.551	308.781	310.081	502.808	282.623	334.946	285.928	413.824	283.918	323.657	579.178	364.836	411.651	315.798	251.914	314.458	395.601	356.757	262.553	376.007	350.087	529.033	339.405	388.883	327.803	367.93	317.407	296.154	352.03	282.623	263.141	255.758	275.184	251.622	353.666	328.598	397.37
C14orf45	95.771	289.703	562.011	489.194	518.24	73.6417	146.528	227.374	396.418	426.658	202.265	293.787	210.192	56.5292	322.791	137.935	95.8929	325.322	175.352	226.331	189.583	184.061	245.31	332.093	269.742	52.4633	134.926	634.479	98.712	70.4024	87.3077	136.966	503.763	183.829	252.801	235.118	1442.97	194.802	142.553	355.385	220.669	131.56	106.978	96.6883	69.6722	92.7259	67.9303	93.0448	402.926
C14orf58	67.8186	70.4931	70.5755	70.836	69.8201	53.9877	73.797	71.6691	71.3266	74.1181	293.91	113.153	75.6435	98.1754	137.47	79.1392	127.989	47.0578	79.9712	42.8141	60.0189	59.8694	42.885	86.8221	113.114	56.8259	78.9156	70.9011	103.727	42.7497	53.8476	62.1107	91.8906	122.174	64.0813	22.1088	65.4186	86.2389	263.527	57.7732	59.2106	99.8565	42.8473	133.831	106.65	98.0228	72.8355	75.9454	228.5
C14orf80	121.791	90.5914	71.6466	113.426	122.326	51.2931	162.696	97.0121	72.878	65.0186	109.767	142.462	94.7625	149.633	127.412	76.1578	64.95	77.9271	86.5616	110.963	84.7867	90.6399	69.1148	80.714	171.765	155.018	81.6765	97.2043	74.9971	221.202	215.627	126.529	70.2238	87.3391	90.5914	96.248	85.6678	116.231	145.988	97.8296	112.864	199.735	133.786	184.644	182.075	111.179	147.916	163.006	77.5692
C14orf93	331.815	298.818	239.223	282.722	313.359	204.014	396.73	289.703	221.51	222.059	291.991	334.551	298.818	279.293	287.233	306.051	408.242	211.19	245.145	271.134	210.264	255.494	416.82	244.826	300.334	415.37	294.901	300.122	269.328	332.093	275.077	250.722	275.517	238.195	281.3	294.365	261.129	272.641	388.883	559.293	209.964	363.146	356.303	303.499	356.437	355.026	372.14	381.057	296.411
C14orf94	951.659	382.02	294.365	306.281	382.52	263.527	608.482	607.788	324.423	342.091	733.643	777.268	573.072	607.491	521.385	1539.9	1469.35	367.601	550.411	679.098	551.213	518.529	662.764	1038.72	754.437	531.241	488.274	566.826	669.044	688.503	401.464	346.952	734.449	557.682	452.454	961.204	336.428	757.91	1369.51	1520.45	485.105	1026.72	392.92	634.479	910.552	493.59	780.361	773.885	1517.46
C15orf15	942.133	1021.24	1340.79	952.99	897.706	1295.93	823.52	1126.6	765.867	759.899	705.682	650.438	994.41	796.105	901.463	848.128	903.17	627.228	1090.84	877.183	940.286	1041.02	1119.54	1142.38	854.794	822.327	1012.83	1213.66	791.059	656.216	870.831	959.847	891.226	938.309	820.166	711.464	545.673	1121.44	431.777	672.722	1097.49	587.005	992.509	688.115	688.901	1095.8	634.139	549.519	636.188
C15orf17	180.904	209.318	274.875	238.786	192.392	147.651	183.778	166.791	187.427	161.736	145.013	190.649	198.559	256.95	237.847	137.235	163.4	152.029	139.945	197.699	198.038	171.638	303.727	164.7	163.074	163.006	148.237	189.521	133.373	219.706	265.343	176.196	155.389	170.151	171.54	210.335	182.138	176.907	192.266	199.521	161.885	160.496	207.152	187.493	178.819	171.29	146.82	158.926	163.539
C15orf24	277.439	314.608	435.043	286.617	279.901	523.251	264.88	277.303	203.562	238.109	350.238	174.023	248.881	405.643	303.499	398.23	353.384	209.964	463.649	268.624	250.995	206.748	409.663	399.93	283.269	313.602	330.077	296.268	316.067	295.823	368.391	284.633	285.928	321.771	294.155	351.12	209.186	311.29	174.811	423.781	345.485	173.85	296.634	107.657	140.943	343.678	152.087	140.414	339.833
C15orf28	524.096	187.624	219.835	318.826	335.368	141.179	197.571	210.47	217.957	259.787	206.95	449.953	256.95	291.869	353.384	261.031	382.02	565.534	240.729	360.635	255.125	303.62	382.52	197.902	383.311	207.298	204.297	540.422	391.488	376.007	188.051	249.34	315.918	310.46	226.033	382.853	207.592	314.876	808.942	347.619	323.385	394.089	334.551	592.747	400.796	312.34	523.251	483.625	440.25
C15orf29	69.7354	65.8976	145.34	63.668	50.612	106.589	105.813	137.704	70.5554	43.0694	33.1241	37.1747	46.3197	121.08	53.8129	375.343	121.572	74.7493	182.916	40.2375	46.1264	45.169	290.644	154.49	52.1502	113.5	59.7296	185.35	210.128	29.8896	64.5306	60.2297	221.135	42.0425	89.9454	122.401	32.1812	77.453	64.8065	182.733	82.0683	14.0851	54.1978	14.9405	15.578	68.7549	25.4076	15.9572	141.594
C15orf39	1402.6	1050.03	566.462	988.345	841.535	1000.61	759.434	923.729	1035.24	891.226	1221.4	791.059	686.399	727.285	894.169	1526.82	1282.55	995.886	1288.4	1124.13	952.229	775.322	553.803	1026.72	1182.18	798.112	1068.91	876.528	1717.2	569.165	453.316	1091.66	856.536	2096.99	990.362	681.044	1381.09	1053.09	1422.2	894.771	1031.29	648.13	1057.98	582.595	792.128	953.695	931.109	845.964	1150.07
C15orf51	2613.38	2487.53	3874.19	2696.96	2084.89	2780.92	3310.93	3957.66	2745.18	2217.84	1788.11	3082	2482.17	5702.99	2317.77	2963.73	3159.57	4125.35	2769.59	3114.15	2637.56	2307.33	4603.02	2542.46	2559.2	4253.44	2992.46	5516.5	6570.22	4028.65	4453.16	1809.9	4091.26	1224.89	2373.94	3660.42	1211.12	2473	2247.22	4195.79	2725.33	2933.25	5301.38	3602.97	2618.86	4195.47	3263.76	3441.47	2688.87
C16orf24	291.869	205.054	58.5817	198.038	147.44	252.59	244.256	209.742	198.038	176.907	277.841	275.617	208.836	186.594	165.059	244.256	191.833	238.947	303.258	174.986	310.825	324.561	58.2398	313.483	287.154	215.256	204.083	167.072	223.038	267.413	172.231	332.871	185.403	321.106	256.876	82.0948	172.793	272.827	251.914	152.329	269.83	230.2	303.62	334.116	247.574	283.591	311.163	277.625	181.031
C16orf28	156.207	148.326	147	132.204	104.959	129.8	95.035	144.118	188.051	204.297	120.13	116.957	123.714	139.712	112.115	205.836	108.184	287.708	134.42	134.458	186.594	191.583	133.237	116.601	125.445	62.8335	87.3897	209.457	181.949	125.287	86.2105	124.463	153.244	134.011	162.532	149.978	111.285	155.485	121.185	108.946	155.643	129.093	134.755	121.038	110.282	112.115	141.087	143.617	244.826
C16orf30	185.855	218.868	76.938	234.774	189.521	158.463	136.923	153.631	201.327	225.171	155.119	166.476	282.623	127.565	219.318	108.216	115.134	126.996	226.112	189.829	221.058	226.808	86.3645	274.186	186.594	208.143	190.217	135.679	34.2118	149.04	255.758	329.367	205.63	226.331	194.462	99.0226	166.58	159.482	128.244	160.555	288.286	205.493	198.157	221.269	239.415	143.217	142.462	165.725	57.8457
C16orf33	210.47	204.35	134.011	200.697	172.614	324.809	189.903	279.198	170.369	198.36	147.916	229.763	184.837	176.077	178.882	244.826	217.05	151.635	208.505	225.705	244.069	240.565	86.8221	320.305	276.789	293.91	276.894	170.492	192.805	217.957	257.297	149.04	218.315	280.563	256.483	115.828	213.09	256.678	269.742	107.657	181.949	304.697	284.334	425.847	285.167	272.641	365.146	327.803	82.9528
C16orf35	414.619	3300.99	349.198	719.247	627.94	261.817	1402.6	486.604	1971.52	1971.52	310.207	2508.7	535.416	410.756	449.188	300.122	425.251	986.172	432.456	890.579	1090.84	979.559	570.31	601.999	689.263	747.612	1525.38	1124.96	596.661	802.351	197.322	592.48	562.82	2313.73	1016.42	500.146	1546.17	819.173	2249.25	905.203	1012.12	839.772	422.602	842.084	1264.97	530.475	758.417	705.682	920.53
C16orf44	389.043	366.513	208.578	311.29	374.701	258.876	420.16	302.294	261.817	287.922	311.163	408.069	415.37	321.366	355.026	225.476	367.426	285.042	243.794	389.204	240.476	232.691	261.396	222.132	347.619	482.869	336.126	243.794	334.116	540.968	399.26	341.134	348.437	331.429	364.389	330.837	250.434	427.864	313.483	398.797	305.439	416.82	346.952	422.602	411.825	404.948	374.367	362.192	378.195
C16orf48	246.436	218.315	464.115	220.669	227.312	113.328	385.749	169.172	182.793	176.67	215.185	243.888	202.999	313.483	275.917	336.736	286.402	180.357	231.663	240.322	138.989	139.712	524.096	154.716	259.058	330.199	181.949	190.018	261.605	335.515	216.332	208.971	222.966	171.824	239.047	493.59	136.224	236.469	230.816	416.308	237.693	260.176	223.038	192.266	231.06	237.693	257.297	278.382	314.213
C16orf57	378.712	441.751	198.099	378.345	252.907	269.643	506.748	271.022	436.011	330.837	478.837	323.756	285.697	258.325	396.235	424.52	1350.99	403.653	327.556	331.568	398.41	281.801	374.848	309.963	302.294	497.796	525.998	521.615	471.056	307.14	238.859	276.022	376.53	399.93	296.754	361.755	259.787	276.022	816.474	1077.75	341.262	327.803	411.115	215.034	306.523	486.145	338.243	335.78	559.293
C16orf58	631.857	775.322	462.253	657.337	708.775	636.188	575.233	469.584	486.832	463.874	476.275	461.827	712.189	576.161	562.82	311.163	489.194	282.293	509.554	577.018	510.855	410.756	495.211	449.551	548.2	780.361	777.838	482.869	315.01	715.52	704.512	601.028	421.265	362.505	669.432	505.733	539.835	455.455	355.385	616.29	458.037	436.429	891.226	605.708	505.733	853.689	445.018	433.724	348.601
C16orf61	781.732	535.416	1436.98	1025.88	757.91	991.779	926.394	883.926	842.563	816.925	1430.51	776.352	958.512	980.234	752.054	616.679	526.551	759.434	908.125	728.888	654.38	695.985	690.194	786.247	1134.94	843.789	737.664	794.524	924.366	753.97	1359.77	930.449	780.898	590.947	697.297	405.295	1002.02	802.351	404.558	477.224	842.563	659.168	888.272	747.612	857.079	796.595	719.719	698.143	589.524
C16orf63	365.815	540.716	405.808	323.048	447.574	565.534	252.389	339.112	395.772	359.913	325.322	306.385	390.793	287.708	354.438	356.437	304.07	342.832	514.371	311.771	415.93	411.825	360.064	477.224	369.043	273.24	464.537	410.937	305.933	250.258	344.985	394.953	365.146	383.523	383.148	269.328	537.088	357.961	166.911	360.935	308.914	246.096	395.772	307.505	305.439	401.464	272.029	233.781	336.428
C16orf68	464.72	447.973	484.592	514.111	315.388	228.5	618.959	197.06	368.739	337.593	272.736	281.702	453.114	293.346	607.788	256.202	408.959	509.255	373.442	299.29	457.61	465.787	373.909	314.458	468.252	439.231	405.471	249.34	264.024	438.245	327.675	457.61	524.342	409.851	445.427	694.028	1151.16	260.718	329.652	396.895	447.118	328.724	278.172	320.452	516.159	453.52	695.165	713.095	408.069
C16orf69	1015.6	526.551	709.587	643.125	769.461	754.437	498.686	612.235	602.408	683.936	808.942	504.297	774.297	527.066	848.128	1016.42	970.769	761.614	947.681	708.29	671.949	819.173	882.586	1025.88	718.51	486.604	624.323	808.942	898.394	476.016	465.572	797.655	830.068	896.453	988.345	781.26	614.956	723.549	595.637	925.032	811.562	502.808	490.829	402.376	460.407	586.673	452.454	482.435	1415.16
C16orf7	383.523	331.296	61.3434	231.233	278.991	240.729	232.489	220.758	337.705	363.457	874.362	260.261	218.704	176.67	196.536	583.237	750.437	368.739	352.03	191.724	221.805	214.394	68.823	345.153	444.24	221.346	292.552	220.224	319.754	233.607	130.34	321.908	344.862	354.739	230.027	249.954	241.433	283.591	892.442	399.26	266.832	422.786	266.937	222.132	350.531	384.141	258.034	255.845	480.741
C16orf72	1019.66	676.034	604.083	758.417	638.336	366.677	668.354	442.562	874.854	782.771	712.189	841.05	597.956	509.554	715.52	874.362	1050.65	1049.01	607.788	923.09	769.93	795.07	1010.5	598.313	675.188	575.233	632.779	682.162	853.111	598.313	461.546	789.707	785.685	913.928	734.883	932.434	440.619	950.271	1015.6	772.42	827.795	787.708	521.615	609.597	846.995	690.86	859.796	841.535	1396.88
C17orf25	250.822	264.88	250.53	217.05	260.261	305.696	165.933	333.27	203.279	205.914	205.971	115.725	229.513	227.374	201.661	212.148	110.874	162.083	311.868	238.947	200.303	258.21	196.593	293.122	231.815	227	206.883	302.178	196.334	200.842	300.673	293.346	207.228	206.249	233.357	128.936	145.988	284.012	81.8581	131.006	220.146	127.452	218.02	120.709	132.416	211.256	104.834	115.055	119.964
C17orf39	79.7767	142.044	136.838	151.28	199.521	51.7733	201.12	131.933	192.634	158.19	112.794	221.805	134.293	72.2021	144.746	68.4668	101.284	201.661	74.7255	146.618	115.506	108.356	231.744	101.09	120.788	90.3437	138.026	137.935	114.063	120.966	93.3862	105.274	180.085	198.824	158.571	244.826	538.181	91.6764	185.403	188.181	140.902	130.764	106.752	137.47	117.725	86.0264	175.909	164.799	160.715
C17orf44	446.508	419.584	476.016	297.664	393.437	466.016	404.948	415.93	355.664	354.097	495.447	516.159	436.842	430.225	483.625	447.365	326.524	427.864	492.434	463.432	291.084	330.441	352.609	486.832	519.853	375.017	386.358	365.64	467.779	384.141	381.856	542.346	367.101	407.572	472.201	351.558	420.16	553.261	318.175	254.124	456.608	562.011	381.365	435.656	422.786	410.03	400.96	435.656	413.453
C17orf45	3485.06	2512.8	3029.89	3816.49	3003.65	2433.32	3966.94	3673.32	2354.13	2576.22	2153.52	4951.22	3724.97	3555.27	2618.34	2165.04	1609.86	2539.6	3314.37	3212.91	3322.24	3437.45	3146.16	3308.07	3593.45	3073.22	2657.59	3925.14	2074.88	2780.14	3854.88	3472.43	2689.96	4301.57	3008.66	2088.18	2931.84	3571.61	2264.59	2609.91	3747.39	3452.13	2602.14	4385.86	3540.37	2099.42	2963.13	2699.22	2483.01
C17orf49	718.111	751.302	243.294	506.748	527.416	828.328	822.915	769.025	685.954	676.034	665.451	992.509	625.845	584.238	604.083	761.127	760.717	610.887	748.103	553.803	871.346	835.411	207.152	703.271	672.294	732.817	1040.24	596.359	594.716	732.412	700.33	733.249	540.968	886.913	596.359	332.594	673.168	782.771	1330.14	437.808	701.582	1231.98	948.397	1464.99	1322.43	856.005	1254.47	1250.36	496.382
C17orf56	1650.69	885.155	983.21	973.965	1466.33	458.906	1526.82	973.358	838.635	934.479	783.269	1580.9	1245.73	1108.54	1033.64	657.719	931.109	709.189	641.148	1327.78	859.796	846.995	1140.44	827.795	1368.14	1499.61	867.225	744.863	972.702	1656.52	1220.24	1185.38	915.25	748.549	1422.2	1703.6	818.517	1318.62	1650.69	1357.06	1162.05	1836.41	1184.3	2032.36	1658.55	875.35	1745.17	1782.23	1190.9
C17orf59	977.368	763.822	1300.84	867.834	858.265	569.165	1018.13	889.336	760.366	778.91	701.106	803.362	914.582	1074.48	723.902	691.212	709.189	762.913	816.474	786.723	786.723	785.177	1076.83	747.612	1010.5	1048.2	771.377	609.597	645.371	1287.18	1298.57	1046.6	814.909	795.07	726.915	851.894	734.065	916.588	995.886	838.635	805.893	1030.04	939.543	1165.84	1085.63	889.336	1082.88	1059.74	618.554
C17orf60	85.816	59.6591	180.646	49.4829	167.016	60.0374	149.334	89.8871	78.1141	95.8359	307.265	222.732	281.088	128.198	194.268	70.2238	191.395	50.0999	68.2511	213.433	75.1099	99.1838	79.0653	49.0656	81.2247	126.996	68.8686	118.673	119.342	312.953	88.4993	86.3645	312.225	90.9925	94.2297	50.9429	60.8172	87.7295	247.046	44.2182	152.467	163.854	134.506	136.966	83.141	63.3489	133.106	141.179	184.463
C17orf61	1000.61	461.063	374.701	1056.22	446.508	660.67	918.537	953.695	803.852	779.874	887.483	946.917	1022.82	666.975	1005.75	565.534	706.072	573.418	627.613	760.717	967.927	1022.82	318.572	648.967	1013.55	893.093	845.964	674.766	652.834	871.346	794.086	979.559	819.689	1023.67	959.131	361.903	782.253	834.318	770.937	486.145	942.133	985.426	920.53	1333.86	1171.43	885.155	1186.55	1183.38	579.178
C17orf62	898.394	949.629	496.86	797.111	755.927	888.272	1118.65	975.375	884.585	876.528	1173.74	1369.51	644.573	-17.1139	778.461	1292.16	1476.98	1099.02	1052.28	788.222	1097.49	961.204	641.148	1090.84	856.536	950.271	991.074	1045.85	1194.65	1502.66	622.659	613.283	1173.74	1257.92	774.297	1067.24	774.297	752.974	3003.65	1215.95	788.222	1368.14	1130.29	1227.8	1349.86	988.345	1469.35	1386.12	1027.57
C17orf68	234.812	212.212	159.78	161.459	173.172	116.53	222.011	203.431	139.424	148.261	164.289	242.333	197.129	223.378	200.416	152.778	168.018	169.757	121.552	220.611	143.54	146.223	150.098	140.268	218.714	289.248	177.057	111.192	125.899	269.024	281.559	227.986	154.016	135.337	195.65	210.253	175.327	191.099	153.642	252.688	144.73	216.531	213.415	257.405	217.944	208.486	211.072	226.176	163.912
C17orf70	599.474	730.598	725.643	601.326	614.616	302.648	980.234	514.111	458.719	418.847	440.03	754.95	648.967	837.01	481.279	308.914	542.025	373.593	364.688	463.874	454.163	497.545	675.645	392.591	603.093	981.785	655.168	472.473	466.421	1200.56	965.892	513.542	474.203	432.456	486.832	690.194	367.78	513.051	674.375	728.519	388.33	814.909	914.582	1243.41	923.729	707.865	850.816	843.207	362.82
C17orf76	88.3575	140.358	93.1558	69.2636	100.044	28.3549	142.371	74.9472	91.1711	83.7346	94.525	121.112	100.362	97.6753	96.7854	82.0948	133.457	115.285	71.5087	157.351	80.0401	67.7145	170.752	101.061	124.817	100.652	141.955	46.057	101.319	133.326	111.179	134.506	82.8774	112.085	118.064	185.726	300.228	146.666	104.465	184.33	111.003	93.0165	134.458	96.811	115.096	93.8667	130.047	113.223	156.046
C18orf10	317.684	1529.99	494.006	681.347	847.57	184.53	677.917	495.447	588.311	496.614	365.64	1085.63	390.025	242.8	260.812	232.691	235.308	798.112	318.175	513.265	760.366	715.069	777.268	453.967	435.043	343.366	833.168	784.2	231.576	1056.22	330.699	558.016	391.11	988.977	752.503	722.752	2548.59	552.977	374.367	743.542	1228.77	705.308	384.943	589.187	458.483	383.848	562.314	617.019	567.936
C18orf17	165.994	274.47	130.587	246.512	229.063	181.031	163.006	167.345	194.133	202.999	155.389	192.931	187.493	214.748	226.574	194.462	135.964	193.321	201.196	212.148	189.227	197.263	94.1434	153.007	234.61	251.436	225.338	199.391	122.631	246.777	243.888	253.255	120.752	178.502	184.892	147.69	163.288	174.255	189.903	153.343	163.539	163.006	267.517	248.709	241.518	225.171	164.106	167.849	117.46
C18orf21	241.95	225.476	258.609	219.166	243.55	253.437	225.022	198.36	191.773	203.059	323.756	175.701	218.02	262.553	241.102	242.957	240.823	155.945	283.049	240.823	174.073	199.045	232.941	289.467	231.233	241.179	221.51	215.034	199.192	173.717	191.965	252.3	195.392	264.581	200.03	227.312	195.501	243.706	133.373	246.777	235.118	174.352	242.8	146.176	171.638	246.365	175.166	159.482	198.682
C18orf25	538.263	402.183	442.456	547.164	734.041	310.734	408.004	503.907	578.351	596.934	745.465	484.055	491.329	533.157	640.206	765.984	438.97	449.656	448.388	570.031	516.542	513.672	742.827	418.745	627.256	404.25	362.448	437.617	538.652	417.565	468.716	535.689	424.881	520.124	535.847	1043.28	559.727	500.821	397.446	498.119	572.857	473.83	372.063	415.716	424.759	345.822	447.477	465.902	1194.43
C18orf37	266.393	265.918	286.515	236.395	215.936	215.936	365.815	188.304	263.527	262.438	348.728	333.548	269.742	288.484	274.978	213.874	263.817	209.669	186.036	319.903	191.092	239.319	264.681	192.931	239.319	305.81	278.065	310.46	190.275	264.475	311.977	205.775	218.616	219.998	276.699	297.664	318.681	284.734	164.534	282.293	268.027	312.48	288.72	324.929	331.154	224.071	290.847	275.077	279.901
C18orf8	621.031	762.449	659.943	906.95	1058.87	706.497	714.261	738.1	937.601	1000.61	867.225	860.392	699.886	641.572	723.549	692.041	608.799	952.229	795.07	728.519	664.226	849.73	669.743	771.882	742.114	595.042	665.451	752.054	647.346	772.931	637.941	805.893	827.159	838.049	770.44	966.496	1323.88	721.127	723.902	607.491	748.549	728.888	721.127	776.815	620.021	639.466	617.588	646.128	806.362
C19orf10	475.804	443.828	285.928	374.055	331.429	2952.75	832.111	542.943	409.663	592.116	519.048	608.482	475.804	701.582	384.475	291.759	440.25	387.596	352.609	418.63	575.582	585.502	210.977	450.589	481.744	631.453	481.279	403.986	420.539	579.773	1709.5	428.601	339.552	443	338.964	310.825	319.903	581.602	558.016	369.322	399.26	755.49	463.649	1004.48	857.626	835.934	718.51	692.858	293.241
C19orf12	166.668	155.411	154.195	174.979	227.164	121.996	188.043	161.449	149.8	141.266	299.025	205.046	192.943	224.513	132.159	87.7109	106.873	161.438	109.833	196.98	221.341	198.552	133.549	137.779	203.591	297.822	172.415	122.097	89.5109	270.295	235.453	218.279	140.451	105.454	165.836	163.495	162.942	170.947	151.37	173.674	157.466	264.927	266.64	277.643	247.61	164.483	214.329	222.959	103.1
C19orf2	1047.51	972.067	1275.4	1424.72	1529.99	1179.06	704.512	1053.87	1054.7	1078.51	881.378	893.093	1330.14	764.775	805.893	787.708	424.184	858.748	1080.2	1175.73	1148.95	1318.62	1126.6	1283.6	1033.64	1075.99	864.028	935.199	589.524	825.062	1197.68	1354.69	834.318	890.579	1132.17	658.113	812.69	1096.65	525.216	596.359	828.904	931.764	861.023	1025.1	864.028	805.324	726.131	756.925	465.354
C19orf22	9622.84	15832	6061.36	10786.8	13242.5	9928.79	10173.9	9978.13	15390.6	14615.7	8698.6	12295	10230.8	5687.19	8155.34	16936.2	9928.79	17894.1	15708.8	10786.8	12154.9	12365	9513.95	16295.5	10975.4	7658.65	10283.8	10332.9	9978.13	11881.9	3800.7	13323.8	10230.8	14705.1	10552	8324.22	16104.2	9513.95	13407.3	10915.9	8910.79	10737.3	11089.3	11732.3	7811.59	11803.5	9207.77	9513.95	13063
C19orf25	281.801	304.825	63.9957	194.802	235.308	112.224	224.467	142.969	172.51	184.201	162.027	172.558	173.55	218.552	204.161	202.483	257.122	167.907	174.759	226.727	195.828	174.921	62.6307	201.918	239.59	306.658	256.384	147.049	148.756	148.756	138.942	241.675	205.836	203.825	273.424	166.415	158.463	208.836	230.512	192.805	225.414	233.178	284.834	258.981	186.771	314.096	222.966	204.083	266.195
C19orf33	197.699	183.593	82.5717	145.608	94.6634	47.2417	30.0854	58.6009	91.5856	86.4774	48.4907	23.0235	110.708	76.4035	144.166	89.1881	38.4531	30.6303	195.19	39.6442	99.1237	102.365	60.1146	103.727	95.1298	48.4624	242.8	100.518	43.9705	153.973	43.9071	131.647	38.8629	134.8	217.719	60.5241	112.794	58.8886	114.853	70.9631	135.409	72.29	45.5885	67.9303	173.328	154.579	42.0763	40.2	59.3326
C19orf43	812.211	967.927	305.064	630.36	467.086	879.108	705.682	844.361	729.282	697.297	604.083	867.834	623.354	502.281	666.975	1155.07	821.166	797.655	1239.61	706.497	929.81	830.567	294.788	1403.97	769.461	742.574	957.86	818.517	699.479	654.38	571.167	920.53	650.12	1195.8	707.351	432.227	923.09	744.443	905.761	704.957	999.012	895.372	1038.72	972.067	947.681	817.432	873.623	811.562	662.344
C19orf50	183.3	435.656	173.601	229.763	198.099	378.519	193.72	210.405	268.807	227.461	228.326	212.148	213.799	218.796	216.271	450.818	307.025	255.758	472.201	199.96	231.744	218.796	145.902	391.11	214.525	192.519	395.426	223.748	228.247	199.593	176.077	260.534	230.816	380.238	245.58	202.862	344.124	209.742	224.135	236.172	279.817	182.86	298.271	172.065	152.087	374.055	216.77	185.978	262.226
C19orf53	655.85	567.679	347.358	517.964	314.458	442.769	914.582	563.726	484.592	446.334	451.236	631.857	609.881	682.628	581.287	472.201	631.453	430.432	538.181	557.682	538.697	436.204	343.82	485.344	615.938	887.483	743.542	371.863	425.251	752.974	860.392	674.766	468.877	630.728	590.616	412.002	442.562	540.716	461.063	592.48	547.939	578.498	896.453	763.354	721.931	778.91	670.146	735.835	330.578
C19orf56	1269.74	1363.83	1826.98	1319.8	719.247	1169.58	2382.72	1899.42	1207.99	1242.16	868.986	1649.05	1119.54	1824.89	1402.6	949.629	1547.96	1045.85	1309.53	1382.29	1051.32	1220.24	1765.8	1289.62	1384.8	2017.34	1513.87	1350.99	1526.82	2032.36	2096.99	1357.06	1457.62	1463.64	1221.4	1200.56	1148.95	1557.45	1442.97	1576.07	1450.26	1680.24	1498.04	1971.52	1547.96	1523.64	1670.94	1844.98	1110.27
C19orf58	564.011	572.689	331.815	623.634	424.52	594.39	632.779	712.189	487.768	501.11	557.682	578.498	600.439	590.255	572.401	602.739	660.67	573.758	562.82	595.637	533.477	618.959	310.825	487.556	581.602	562.314	576.407	617.588	631.082	657.337	524.342	591.527	605.069	704.512	621.985	451.044	626.582	574.67	605.708	615.265	465.145	571.167	560.811	555.608	684.354	633.147	651.052	683.474	436.204
C19orf59	1993.34	433.29	1174.69	461.063	428.601	459.822	867.225	531.528	610.887	610.55	1084.74	618.554	700.687	752.054	899.015	1669.06	5029.02	822.915	1085.63	508.5	410.241	412.751	1564.71	951.659	509.002	618.959	611.22	2417.96	1283.6	1984.12	613.871	459.822	1275.4	1039.44	674.375	1984.12	532.629	488.274	6888.34	6483.1	656.216	1589.39	564.643	980.234	1359.77	711.464	601.603	679.098	1988.64
C19orf6	84.2239	104.772	74.7843	102.271	96.1664	114.559	164.157	119.465	117.385	122.226	92.2917	189.874	91.9812	133.667	77.3578	61.5986	107.065	111.117	57.8466	84.5148	130.253	116.846	71.1294	62.4293	94.4913	140.48	71.2193	88.813	134.651	190.87	140.13	78.7456	98.6231	108.566	95.8937	97.614	92.1388	87.9314	280.434	89.0387	66.1129	221.7	140.345	294.102	174.163	107.929	203.368	178.447	98.749
C1GALT1C1	146.177	120.467	211.19	115.681	111.324	273.194	135.669	137.385	129.828	157.206	231.916	109.086	100.811	164.395	167.783	186.537	189.444	135.252	177.13	125.09	135.827	130.025	239.822	169.664	92.291	148.212	121.591	158.838	178.749	81.8423	113.559	143.132	126.83	160.998	101.454	157.325	84.2142	114.386	115.596	163.366	119.039	90.6275	114.289	72.7363	95.5796	140.11	78.8187	103.031	127.424
C1QA	4.61139	19.9786	29.6226	54.8674	7.11024	25.1106	47.4494	129.968	85.388	80.5353	178.213	35.5536	31.4585	88.5902	62.4927	43.9705	31.7515	11.8198	50.5153	9.10885	28.7666	27.6353	19.1315	43.0823	52.1328	41.9288	42.1164	37.3731	228.031	57.1136	53.3778	5.43096	44.5401	8.58325	22.434	5.80469	57.9938	28.3465	247.224	114.987	45.0333	141.999	83.7986	81.0764	59.8866	70.7471	136.009	151.99	38.5091
C1QB	-0.279314	9.52489	3.58855	22.1321	2.50108	9.52602	14.5354	71.1788	69.1965	54.7723	186.533	1.49464	8.73526	78.5698	28.8348	4.61465	20.5752	8.00048	31.536	-2.15397	5.58824	11.1568	-4.26602	16.8207	20.1564	13.4403	3.43091	22.9031	109.767	23.2711	34.8936	-3.17598	20.7629	1.71193	-0.966823	-1.59457	25.6332	17.56	209.042	74.2901	45.4615	71.5975	35.3368	34.783	20.4009	25.4887	56.793	61.951	68.0787
C1QBP	576.161	515.348	422.602	482.63	603.093	792.597	382.658	504.297	510.015	533.204	431.991	400.796	540.968	414.19	437.224	357.403	297.455	439.015	444.803	543.25	677.146	656.559	498.252	573.072	547.071	429.844	525.216	508.262	265.739	535.973	745.816	714.675	352.609	688.115	448.797	425.092	571.488	495.447	313.359	379.213	533.204	449.366	425.626	501.806	484.351	502.281	401.652	372.14	368.588
C1RL	313.85	368.245	261.223	199.521	204.224	174.255	221.202	199.96	263.048	213.653	269.112	230.444	175.602	219.024	263.527	359.446	654.732	289.03	282.722	283.694	191.894	160.555	341.262	317.078	284.525	243.888	317.298	306.051	293.122	199.045	156.207	281.52	239.669	362.054	230.974	287.922	185.726	282.173	221.736	473.271	311.868	189.639	292.768	110.163	160.665	361.903	174.073	189.69	451.236
C1orf108	225.103	202.207	310.11	184.082	237.825	245.54	277.423	200.422	335.202	368.204	275.466	232.65	230.647	268.138	259.951	185.348	243.569	397.588	188.779	321.56	339.804	319.073	294.988	161.678	230.231	298.523	181.321	177.34	321.627	276.793	242.188	173.5	222.796	215.002	283.391	396.296	287.048	281.475	216.609	336.858	281.154	395.544	177.16	275.638	277.786	152.371	328.56	356.14	346.852
C1orf119	652.45	580.378	920.53	577.94	564.358	420.353	561.701	635.809	579.773	621.031	770.937	552.122	574.67	578.221	710.48	768.556	732.817	528.49	655.49	762.913	556.215	567.063	1237.61	625.494	620.337	724.361	523.251	607.168	731.959	469.334	456.125	580.084	568.483	597.34	618.279	721.519	438.432	715.957	579.178	714.675	640.859	694.774	575.582	471.056	485.935	567.063	554.963	550.673	792.597
C1orf121	319.224	283.049	327.932	267.807	345.153	317.546	237.43	265.445	266.492	271.43	295.257	278.172	317.407	265.739	297.926	316.067	217.55	280.652	291.186	348.316	313.602	341.682	406.722	278.876	271.43	223.665	265.15	316.947	293.674	212.295	280.563	297.332	279.082	278.172	301.958	272.441	238.457	323.159	256.483	241.274	301.588	231.06	285.273	237.847	242.109	232.402	303.014	295.145	277.726
C1orf123	296.411	316.471	208.971	299.521	234.946	241.274	224.943	293.91	218.098	232.402	253.349	245.659	264.681	275.406	250.092	272.641	282.722	230.444	342.523	230.366	234.107	230.897	177.478	252.692	288.608	252.202	330.837	282.936	246.7	230.366	298.49	294.155	295.69	288.608	266.015	155.797	195.128	349.674	196.083	217.789	249.52	190.978	380.238	198.099	182.554	301.315	164.745	203.882	243.035
C1orf128	1464.99	4140.52	6210.52	5888.89	6103.57	1258.88	2926.47	4233.01	6365.82	6992.39	2734.75	6575.1	2853.57	1584.37	3376.55	1649.05	1182.18	5272.22	1771.7	2957.22	2167.89	2508.7	3045.35	3681.08	3932.81	1602.81	2212.25	5546.4	1050.65	3328.79	2153.52	4509.62	5771.97	2704.03	3233.92	4975.43	14267.1	3024.14	2900.22	4496.64	3041.25	3018.5	1879.68	5241.46	1562.96	1378.13	2568.16	2584.98	2368.8
C1orf131	236.469	307.025	266.832	202.553	293.554	276.789	188.114	207.152	240.647	265.15	222.816	182.793	225.022	214.32	212.809	296.856	211.546	198.038	300.334	204.498	262.12	256.202	229.371	316.694	225.414	214.525	239.843	216.978	199.815	148.852	204.224	234.107	197.263	285.697	220.608	174.759	221.588	249.52	127.905	164.961	267.604	179.915	261.696	140.583	173.601	298.699	154.288	151.039	227.074
C1orf144	698.551	736.729	667.302	625.178	597.664	391.669	767.696	655.168	562.572	640.501	817.432	873.045	663.787	688.901	699.479	586.07	609.235	612.235	616.29	619.316	626.246	674.766	608.482	721.519	657.337	693.296	651.737	572.062	613.283	807.392	665.451	721.519	670.146	694.429	751.739	841.535	1130.29	670.146	595.042	776.352	870.159	726.537	787.708	738.1	667.956	637.287	802.351	834.875	772.42
C1orf162	4150.38	6436.24	2512.8	5529.06	7212.24	4897.01	5822.75	6127.38	6210.52	6127.38	6913.4	6550.43	5804.34	5787.76	6168.61	5491.15	7187.35	4540.96	5720.41	5787.76	5182.07	5704.39	2568.16	4273.9	5971.76	4846.55	7022.23	5288.69	7658.65	4939.17	5241.46	4780.86	4806.41	3770.16	5408.21	4005.62	3975.6	5182.07	6231.41	5720.41	4691.46	6342.22	6168.61	7624.37	6294.06	6508.05	5804.34	5753.56	5491.15
C1orf174	728.888	629.009	589.949	671.185	736.281	554.377	579.178	672.722	549.215	689.263	695.165	588.002	696.908	874.362	763.354	552.45	510.332	465.787	692.858	647.736	730.074	823.52	515.883	817.973	716.854	758.417	694.774	534.847	521.615	721.519	854.209	651.737	577.94	566.147	724.361	474.203	665.076	770.44	406.883	510.599	608.482	621.985	730.598	790.121	652.45	648.593	636.922	687.254	544.228
C1orf19	196.334	141.179	243.706	189.168	264.965	195.128	184.837	228.5	142.969	155.998	205.703	168.96	235.462	176.792	191.031	112.189	83.2124	107.051	154.027	179.106	215.936	177.876	231.233	200.697	153.537	240.322	144.348	186.719	152.715	169.501	240.729	209.669	176.55	146.72	141.873	114.919	127.905	242.288	71.1999	109.388	183.084	135.147	159.376	188.697	161.493	135.055	101.192	118.544	81.0995
C1orf24	7238.77	4681.66	6271.55	5086.02	4223.35	4780.86	4161.43	4670.52	5753.56	5874.27	5599.49	4496.64	4509.62	3219.32	4703.56	7297.95	8950.71	7624.37	4198.77	5378.32	5787.76	5986.11	8360.47	5272.22	5425.13	5393.56	4120.54	5016.43	6965.92	3563.34	2972.96	4344.26	5227.23	5580.41	5166.68	5804.34	3133.91	5378.32	5841.16	8155.34	5425.13	4254.67	4024.29	3128.23	3966.94	4509.62	4408.23	4691.46	7599.56
C1orf26	143.166	102.487	193.72	163.186	153.728	77.039	101.611	102.129	141.644	155.075	125.534	96.3695	112.963	92.8152	109.174	151.69	113.994	140.817	102.365	159.801	92.6988	91.1431	227.777	127.143	155.945	69.5892	75.2914	239.843	125.326	114.629	92.9067	131.808	138.458	104.372	121.038	180.839	261.922	107.085	78.5902	167.849	107.902	78.836	82.3862	71.2171	87.8418	65.2278	85.7871	85.619	193.645
C1orf38	72.6267	55.3852	65.2532	52.0338	35.4541	40.1375	194.133	134.256	82.9528	61.0025	65.853	168.592	48.7598	115.055	57.4364	112.93	154.184	72.649	74.0462	58.7709	68.4024	59.4269	81.8335	70.5321	63.2546	110.874	55.4926	82.7456	218.232	102.723	56.1814	28.0862	99.9791	61.2889	51.0845	116.199	29.7157	69.0497	328.861	158.091	72.1834	133.106	67.9968	149.415	130.422	57.5856	175.651	183.191	68.6101
C1orf43	344.707	601.728	763.042	429.685	430.271	766.591	456.316	479.073	472.483	463.491	482.147	359.491	390.541	505.306	449.331	456.584	484.813	410.152	600.764	381.689	464.401	520.04	617.757	537.945	371.223	447.975	531.104	548.75	471.82	492.141	502.288	371.344	433.838	673.577	416.115	509.276	489.548	406.928	319.681	498.614	445.699	317.937	425.623	312.356	312.946	507.785	317.82	298.728	411.295
C1orf50	348.601	261.129	401.84	337.851	310.081	251.166	556.776	340.974	275.293	314.213	315.671	431.408	340.392	397.544	379.213	254.409	353.943	297.332	267.311	352.466	326.394	343.519	400.592	292.451	413.824	485.935	321.23	246.7	301.315	491.285	529.033	355.664	316.947	364.062	327.556	351.405	321.518	387.043	383.148	398.41	365.337	565.534	366.806	659.943	608.799	308.186	596.661	621.985	334.116
C1orf52	346.065	259.886	521.385	385.55	416.308	302.525	251.336	331.568	334.946	368.588	386.232	240.322	360.331	291.759	396.418	400.592	260.08	368.588	316.471	380.716	343.678	383.989	605.069	369.322	408.069	295.02	294.041	365.337	343.227	230.747	273.853	399.775	316.067	346.952	373.909	428.601	352.609	375.656	191.833	316.694	377.836	255.212	288.286	193.645	199.815	276.022	219.618	230.974	381.365
C1orf55	321.62	201.12	355.202	281.52	340.818	386.077	145.512	246.614	305.064	384.475	335.642	240.476	261.922	166.207	303.98	490.087	228.247	316.067	336.897	284.114	277.957	340.7	267.926	372.939	290.062	143.386	236.24	309.595	297.664	93.5605	136.694	376.198	322.52	379.038	348.728	232.312	484.351	342.7	127.143	144.917	392.02	202.197	203.955	129.558	148.664	262.933	151.741	211.478	310.46
C1orf56	96.6883	101.319	107.512	78.9888	91.3094	57.2369	124.995	49.8257	82.2211	73.5954	68.1045	71.8798	82.9809	100.263	93.4468	102.365	185.077	50.8848	90.3157	106.24	64.2564	74.0951	202.608	84.3961	97.8296	118.773	141.222	48.5792	51.1604	78.9888	71.242	90.2313	44.6991	50.9759	61.0851	227.242	91.2501	97.0707	35.4003	177.248	116.757	102.261	82.6485	107.693	91.1711	110.543	109.732	98.712	127.186
C1orf59	632.779	586.07	521.911	576.407	689.682	562.314	395.426	577.018	658.502	688.503	527.995	635.809	653.681	530.723	532.331	653.281	485.618	601.028	633.831	627.613	702.445	802.866	702.862	762.059	507.749	498.252	408.242	686.834	420.16	495.211	636.572	621.343	531.241	493.142	573.758	508.723	558.62	731.959	484.109	568.782	573.072	637.941	632.156	727.285	713.417	505.022	635.809	696.908	419.035
C1orf63	1385.29	1148.91	2599.39	1338.77	1563.86	1931.95	964.333	1227.59	1054.84	1050.03	1243.58	595.527	1358.64	1664.87	1479.77	1836.04	1211.72	1038.49	1450.66	1390.62	998.787	1000.9	2351.43	1397.59	1244.17	1161.19	964.946	2061.11	1904.69	945.092	1223.28	1246.85	1540.73	1166.76	1443.7	1506.21	924.075	1251.94	711.525	1291.69	1405.6	669.233	884.88	608.48	628.48	1127.23	586.811	616.102	1766.52
C1orf66	228.104	288.608	49.8257	166.791	199.593	173.004	239.415	139.9	173.79	153.973	221.438	201.12	200.842	145.902	153.288	223.579	362.82	149.685	161.283	168.912	196.928	176.311	47.7412	174.811	254.831	202.862	335.515	161.98	205.493	145.153	135.32	198.038	152.81	200.697	189.099	100.884	208.723	184.589	172.51	218.704	199.815	189.583	297.455	208.655	233.178	378.345	209.318	201.852	267.413
C1orf71	1058.87	1381.09	954.995	1030.04	986.927	1088.16	773.419	673.497	1820.46	1890.41	993.162	793.073	1399.5	737.204	737.204	534.847	491.513	1665.35	900.268	886.382	1561.1	1485.78	995.069	787.708	911.072	752.974	991.779	773.419	589.949	868.347	1395.65	683.474	897.081	732.817	1173.74	878.461	877.183	879.108	360.486	695.985	790.121	816.474	1105.97	773.885	858.748	867.225	723.549	670.454	700.687
C1orf77	320.179	334.386	238.013	301.209	341.682	299.521	354.097	341.971	350.815	405.988	391.488	345.153	336.015	405.471	344.294	322.137	286.15	296.973	237.085	313.23	395.926	395.256	281.702	311.771	311.66	394.089	410.937	271.134	294.47	346.952	475.624	442.363	268.72	325.058	292.768	361.379	499.165	280.652	262.438	288.91	255.845	330.322	412.002	409.135	333.43	394.089	330.441	319.903	361.379
C1orf85	663.437	248.793	420.16	254.671	403.093	343.366	762.059	336.285	294.365	266.757	676.034	435.842	414.428	677.53	484.84	373.74	755.927	249.248	328.468	299.194	328.468	267.807	151.23	371.719	506.978	442.769	228.031	378.195	624.013	650.12	560.811	362.82	207.152	588.931	563.117	417.968	362.192	447.739	452.671	556.776	515.124	247.836	216.555	467.086	645.371	256.031	565.534	574.67	588.639
C20orf108	1350.99	3176.11	2283.43	3073.22	2858.38	1665.35	2242.91	2307.17	2602.14	1804.54	1200.56	1389.06	1777.77	937.601	2158.67	1393.07	1283.6	3300.99	2099.42	1798.22	1678.36	1487.19	2508.7	3762.35	3188.66	667.302	2202.81	4717.03	2099.42	1329	1350.99	1883.59	4188.97	2069.18	2137.27	1678.36	7877.18	1362.63	613.283	1939	2153.52	657.719	1393.07	870.159	420.914	830.567	747.612	965.892	2496.64
C20orf11	443	490.829	355.801	481.744	577.018	303.014	382.02	594.051	593.053	599.207	338.397	542.346	463.226	327.273	461.31	430.225	323.048	598.924	397.544	464.72	559.899	624.686	267.21	526.551	498.686	337.178	374.367	630.728	447.973	336.897	394.248	459.346	516.943	620.337	462.973	349.482	763.354	477.224	506.486	425.092	388.699	486.832	404.558	671.185	416.308	305.168	530.975	498.252	456.125
C20orf116	177.478	217.55	76.3584	119.407	143.217	233.028	165.398	161.233	146.086	122.631	196.855	133.545	124.094	170.807	158.241	213.653	270.017	156.344	234.466	129.222	183.593	155.389	72.7187	179.23	186.771	216.696	263.249	176.373	207.381	163.288	220.918	173.55	128.479	172.793	146.382	104.041	140.358	161.831	214.676	175.531	186.976	177.189	225.554	142.332	214.099	227.242	214.525	213.433	159.376
C20orf121	160.185	112.539	175.531	198.494	254.226	141.419	88.0197	144.648	172.894	148.53	199.118	150.305	185.132	109.388	147.821	192.679	147.44	202.329	130.387	237.085	220.758	243.462	222.966	144.917	174.126	78.5902	105.577	235.725	138.15	214.748	134.293	202.483	156.641	217.05	222.191	222.816	221.887	193.128	150.788	195.949	202.999	156.293	100.584	152.467	143.477	92.4339	132.416	146.086	250.822
C20orf149	161.493	73.7507	61.8751	83.436	79.5171	110.003	91.7737	40.0557	96.5829	87.0368	20.7033	158.876	37.0088	79.5649	62.317	90.9652	30.2774	239.047	235.308	36.6344	132.844	142.086	127.234	103.389	124.317	79.9712	77.0958	80.5884	48.4157	133.159	64.1364	121.72	69.2636	165.505	144.401	21.2809	262.226	174.023	174.073	79.4394	145.851	135.555	73.4806	204.422	167.072	120.429	138.245	155.844	116.64
C20orf169-DBNDD2	501.806	466.016	489.638	491.285	457.437	421.871	404.74	421.871	412.002	358.979	641.148	354.889	580.648	406.722	557.057	287.588	491.285	302.885	414.959	403.986	435.436	450.149	474.203	409.851	529.91	469.126	440.619	333.961	514.652	502.563	387.229	475.391	372.323	450.149	382.52	312.953	378.712	596.661	409.135	369.938	437.033	341.134	397.206	414.793	498.435	543.562	357.236	336.428	440.438
C20orf175	75.8181	62.196	26.911	85.1017	45.2117	49.4376	93.6667	55.0537	64.0459	66.6319	57.7732	157.497	41.6522	27.8878	56.0969	61.1219	26.2226	147.186	109.062	64.2564	82.9528	76.2595	84.0179	106.943	102.458	51.1308	117.236	54.4249	32.6495	51.9201	17.7766	124.776	48.6215	142.508	117.692	56.4933	390.387	65.5428	23.9721	34.862	186.659	92.3092	40.8926	66.7815	30.2532	64.1364	39.8208	56.9077	113.296
C20orf177	696.402	449.366	795.559	498.914	734.883	858.265	340.818	669.743	530.198	789.707	571.488	448.797	717.666	523.751	576.735	624.686	618.279	815.424	519.853	711.879	754.437	833.781	953.695	628.347	449.551	444.24	461.546	991.074	636.188	458.483	535.416	520.123	542.025	484.592	880.833	571.488	619.316	635.162	586.369	815.424	537.088	479.328	401.464	589.949	496.382	555.342	488.923	515.674	750.437
C20orf20	612.235	413.097	660.67	521.615	519.048	371.228	644.988	436.842	380.716	448.974	404.74	534.847	544.539	600.71	446.334	487.986	428.601	396.418	454.163	470.583	417.016	439.829	734.449	476.984	496.86	617.955	457.437	370.576	489.868	676.034	817.973	552.122	423.781	434.877	501.363	565.801	338.122	557.387	570.614	465.354	452.454	617.019	472.473	545.971	585.502	468.252	600.71	712.189	429.844
C20orf24	4846.55	4223.35	4912.54	4740.64	4408.23	4820.9	6294.06	5196.71	5288.69	5737.73	6965.92	5856.24	4752.94	6992.39	5906.56	6830.43	6830.43	5617.44	4044.3	5453.95	4820.9	5599.49	4767.02	5196.71	4951.22	5256.07	5720.41	4613.25	6857.43	5804.34	5149.73	4585.53	5471.53	5471.53	4951.22	6231.41	3362.25	5302.1	7990.94	6711.61	4484.88	8429.52	5041.33	5182.07	8124.29	5334.37	6830.43	7410.55	5471.53
C20orf27	260.631	182.554	440.619	197.767	192.746	144.3	335.093	205.268	166.362	141.787	210.835	178.055	247.75	309.315	164.799	156.149	352.764	172.374	201.471	178.76	161.028	149.509	311.771	281.702	230.816	260.812	254.409	342.832	491.093	348.189	318.442	159.083	181.949	193.461	355.202	151.365	123.265	312.34	240.647	238.195	237	157.635	362.661	444.24	225.554	363.457	270.512	253.718	98.6521
C20orf3	1204.66	874.854	1023.67	845.964	579.467	1038.06	1008.7	1054.7	954.386	997.347	948.397	1623.46	853.689	1333.86	1341.93	2193.74	2293.22	1864.93	1633.92	1219.32	1151.16	982.451	1281.28	1633.92	647.346	1005.09	843.789	2246.17	1317.17	1735.25	817.432	1044.31	1363.83	1623.46	1145.14	2648.43	877.827	1030.04	2483.01	1660.32	1168.77	1729.2	1005.09	1150.07	1427.71	1073.71	1452.8	1459.02	1491.52
C20orf30	2252.66	2267.96	2490.14	2178.39	3300.99	2753.32	1609.86	2543.82	2083.01	2316.63	2376.2	1888.19	2428.99	2316.63	2326.88	1562.96	1661.85	1577.53	1813.36	2326.88	2775.29	2999.3	2486.87	2470.68	2178.39	1780.24	2044.83	1991.09	1910.5	2088.18	2780.14	3008.66	1984.12	2394.56	2470.68	1877.01	1991.09	2803.71	1229.68	1469.35	2669.88	1606.56	2006.73	2158.67	1767.63	2077.5	1713.4	1641.76	1608.12
C20orf4	142.371	167.016	109.907	127.565	159.083	199.67	188.304	180.593	175.406	166.58	174.469	256.591	141.419	205.054	129.929	176.133	138.541	144.874	209.669	139.073	221.588	223.42	82.2472	196.334	151.317	188.114	200.227	124.995	131.137	177.297	196.148	155.998	120.625	176.077	136.838	119.446	156.344	158.773	255.845	106.619	145.106	235.633	250.434	283.049	238.195	183.24	218.935	233.607	105.577
C20orf43	3770.16	2686.36	3062.03	3252.45	3410.72	2762	2968.1	3871.13	2963.13	3335.75	3880.5	3966.94	3343.01	3128.23	3941.41	5425.13	3739.68	3732.41	3739.68	3762.35	3499.14	3555.27	3201.38	3747.39	3540.37	2894.19	3102.53	3472.43	3917.18	3479.76	2597.38	3957.19	3343.01	4024.29	3673.32	4150.38	3504.16	4355.16	4331.3	3747.39	4233.01	3845.93	3139.78	3376.55	3600.77	3240.58	4243.66	4331.3	4563.52
C20orf44	135.362	133.066	188.098	156.088	146.448	132.045	125.007	131.245	96.4297	68.8773	115.722	96.2892	152.038	179.285	115.819	90.325	79.1163	79.1309	102.4	137.828	99.3723	90.4196	156.384	123.288	134.079	156.497	106.481	117.605	83.7282	160.605	235.822	130.239	127.392	82.3558	114.784	95.3176	71.1341	122.446	47.0864	101.262	102.134	93.2485	149.769	98.2046	91.8095	146.812	73.4392	76.1708	75.5008
C20orf52	1011.31	564.643	478.837	912.748	400.592	1353.7	1332.55	1124.96	862.217	952.229	997.347	1143.22	1001.33	908.125	929.81	794.086	1190.01	887.483	1117.73	850.357	1182.18	1250.36	452.084	1075.27	1002.79	1249.18	1274.43	772.931	868.347	1081.83	1176.8	1170.38	837.01	1378.13	962.129	615.627	771.882	801.376	961.204	961.204	1052.28	1107.62	1363.83	1541.66	1467.93	1349.86	1322.43	1284.84	692.041
C20orf55	1172.69	934.479	1592.97	1237.61	1447.25	437.41	1430.51	926.394	1059.74	1075.27	962.87	1157.14	1065.39	1079.34	1109.43	592.747	928.403	810.519	610.197	974.684	935.199	864.028	478.18	720.247	1454.46	1526.82	1303.33	556.491	755.49	1650.69	1212.4	1131.24	978.755	955.734	1069.66	880.364	756.925	1232.97	1000.61	751.302	1148.02	1014.96	1362.63	1239.61	1200.56	1353.7	1167.89	1180.08	729.282
C20orf67	66.1829	79.5416	25.4141	63.1899	54.3772	81.7812	124.663	83.436	70.836	58.507	54.3604	128.974	52.7195	74.6518	66.2196	132.122	119.654	77.1666	126.959	62.6118	57.0581	58.4022	39.1738	106.65	55.3692	97.9892	71.7646	62.4722	92.3092	127.73	87.4698	63.03	97.3031	77.8003	55.285	111.464	46.2398	67.051	186.771	129.057	56.3306	142.969	92.6177	98.4652	173.717	97.1725	166.255	138.632	62.6118
C20orf72	552.705	324.809	370.576	483.865	570.31	405.643	384.298	614.956	448.797	465.145	491.513	363.312	525.75	497.545	570.31	447.739	362.661	424.716	396.73	654.38	456.608	466.664	477.877	462.973	428.601	390.945	379.526	466.664	466.664	297.569	413.097	464.72	440.25	400.96	523.251	340.7	479.065	505.022	299.194	345.153	474.203	270.816	403.986	367.426	452.084	501.594	352.764	346.803	399.598
C21orf2	291.991	326.25	123.612	254.226	383.848	147.821	219.92	156.248	202.803	198.425	136.35	251.336	387.809	249.599	270.111	116.838	151.456	166.415	180.839	210.554	240.565	225.414	149.6	202.667	237.085	329.652	396.895	143.015	95.8359	436.429	380.716	269.924	143.517	174.986	273.967	243.133	152.087	215.554	241.346	212.295	151.84	264.681	354.582	264.581	325.058	210.405	343.82	352.609	122.896
C21orf33	506.259	582.015	453.774	567.752	594.934	588.31	504.797	563.262	611.6	607.57	489.771	602.122	670.216	652.58	567.523	385.602	395.34	452.51	689.353	556.708	555.436	634.234	360.165	673.025	624.206	559.223	660.003	437.847	398.298	714.565	655.145	709.071	473.848	594.535	505.257	450.18	517.292	549.113	505.88	421.049	534.717	560.21	623.761	698.013	674.714	604.68	523.789	549.785	321.985
C21orf55	10786.8	9513.95	15498.1	10332.9	9928.79	10442.6	10915.9	12006.8	11881.9	9313.02	9207.77	10442.6	11340.4	17178.4	10915.9	9417.09	11732.3	14521.8	10386	12761.5	11881.9	9978.13	16412.9	8698.6	10552	14082.8	11401	18676.4	19436.7	13901.2	14521.8	8324.22	14705.1	5149.73	8950.71	12295	5971.76	11401	10442.6	14788.9	11215.1	11149.4	14886.6	12837.5	11089.3	13063	13901.2	12910.9	13822.8
C21orf7	4233.01	3845.93	4871.11	3479.76	4522.05	2916.79	2323.91	2568.16	4939.17	5288.69	4080.38	2326.88	4598.49	3176.11	3786.27	2063.84	3540.37	5564.32	3459.19	2401.02	4301.57	4681.66	2556.72	2833.85	2988.57	2500.24	4540.96	1572.8	2496.64	2490.14	2074.88	3681.08	2622.7	1479.87	2889.43	2451.39	2657.59	3716.6	1014.96	2401.02	2354.13	1585.87	2744.42	1931.32	1817.78	4243.66	2287	2417.96	2267.96
C22orf13	4522.05	8989.69	3652.13	6294.06	9777.65	1344.57	5906.56	3816.49	5841.16	5841.16	3832.18	8734.98	4223.35	2873.5	4681.66	3258.25	3410.72	6938.56	4120.54	6436.24	5149.73	5166.68	6459.9	6550.43	6459.9	3925.14	5822.75	3615.18	2942.43	6127.38	2411.47	7238.77	3300.99	6436.24	6459.9	5334.37	10915.9	7532.98	3252.45	10122.3	8184.76	5041.33	5672.37	6459.9	3383.17	4859.26	5334.37	4820.9	7567.94
C22orf16	403.986	181.16	241.102	269.83	185.596	752.974	314.213	387.043	346.803	349.965	394.422	294.365	328.059	274.064	222.732	300.786	263.726	342.249	634.139	307.265	440.25	436.429	225.022	496.614	335.9	269.02	344.418	228.031	335.9	415.723	315.671	397.206	275.293	543.883	284.834	126.996	237.847	361.755	224.221	170.427	286.282	311.062	381.193	504.014	377.836	384.475	354.889	350.238	163.288
C22orf25	565.534	1249.18	586.673	945.568	730.598	331.429	935.887	590.616	716.427	750.437	500.653	1266.33	592.116	488.707	521.133	815.948	517.198	1024.36	701.582	770.937	849.73	837.548	868.347	1197.68	681.347	485.344	667.302	861.023	468.252	850.357	312.736	883.274	469.846	1824.89	820.648	841.05	3207.77	816.925	889.336	1125.74	992.509	666.975	595.36	850.816	593.053	598.582	742.574	631.082	909.99
C22orf28	266.29	336.897	221.058	269.438	302.053	289.59	239.505	282.411	273.967	294.788	369.043	322.791	285.812	298.15	243.294	185.916	243.98	234.683	206.883	260.434	300.905	287.708	150.388	224.707	303.856	297.332	334.386	188.304	217.332	276.699	338.243	262.438	221.588	266.677	243.379	197.133	269.742	280.563	221.438	212.366	223.906	305.302	358.548	382.346	284.334	384.795	294.788	348.728	167.528
C22orf5	134.59	147.136	126.996	144.746	82.8518	118.773	171.701	195.392	143.015	146.72	137.562	163.444	101.353	203.199	111.944	277.089	204.918	194.526	221.269	171.765	116.344	148.143	120.168	209.815	104.61	118.741	115.864	190.649	240.823	171.179	159.584	107.447	238.457	210.554	140.902	177.993	110.163	128.779	385.55	108.749	142.421	162.083	180.477	196.274	154.34	125.655	293.007	251.436	225.476
C2orf17	337.451	576.161	247.934	317.298	285.167	189.286	717.277	508.723	319.903	341.842	239.047	827.159	272.147	247.75	280.237	332.594	353.223	448.547	313.983	347.108	416.308	363.635	446.16	458.037	313.85	332.093	340.392	371.228	383.523	677.53	276.894	370.905	399.598	625.494	429.659	444.24	838.049	442.562	627.228	396.73	530.975	419.403	316.694	564.913	336.015	282.623	531.835	578.221	543.25
C2orf24	433.515	1076.83	459.146	803.362	434.707	298.699	1010.5	937.036	1071.97	999.737	486.145	998.07	374.055	415.93	601.999	618.279	473.751	951.035	976.067	601.326	685.954	609.597	655.49	982.451	688.115	467.779	673.935	804.347	648.593	1047.51	343.227	805.324	887.483	1099.02	645.765	709.189	1896.93	644.573	986.927	710.48	543.883	485.618	593.053	844.886	340.392	685.538	566.826	671.614	667.302
C2orf25	1338.1	1254.47	1796.3	1170.38	1184.3	2347.41	977.368	1353.7	1410.9	1536.33	1709.5	1348.29	1323.88	1240.87	1420.77	1571.15	1406.66	1123.43	1444.44	1438.46	1257.92	1576.07	2202.81	1439.86	1223.75	811.562	1134.94	1824.89	1373.67	893.093	1439.86	1473.93	1442.97	1415.16	1359.77	1459.02	1196.64	1523.64	1117.73	1226.84	1532.66	1163.81	913.928	991.074	1164.79	1155.07	1053.09	1072.79	1544.74
C2orf28	639.367	803.274	560.169	718.228	874.742	1024.18	632.172	800.959	690.677	719.938	698.839	712.446	787.311	691.283	727.135	563.627	573.648	543.232	764.236	654.353	850.194	868.193	493.178	714.212	787.689	704.241	832.873	727.475	519.12	710.368	861.585	833.439	595.663	760.996	754.568	453.137	639.141	767.82	641.929	517.859	652.095	784.954	761.756	801.908	673.725	822.093	663.699	660.474	531.299
C2orf29	985.426	1061.3	1271.17	959.847	1218.14	780.898	1209.22	913.928	1066.34	1024.36	893.638	1170.38	1170.38	1116.77	899.66	814.366	726.537	862.217	876.528	1152.07	1110.98	1131.24	1129.49	1039.44	1120.56	1318.62	999.737	799.611	610.55	1235.31	1473.93	1124.96	750.882	769.461	953.695	976.067	811.064	1110.27	979.559	844.886	813.251	1144.04	1229.68	1454.46	1298.57	1103.5	1238.78	1192.95	683.06
C2orf30	244.163	288.181	273.967	284.114	245.145	814.909	163.694	270.816	299.891	295.02	278.481	181.398	261.223	198.22	239.505	313.85	207.592	222.732	251.622	237.43	312.34	330.837	281.52	297.09	235.22	177.075	279.636	252.59	206.95	115.828	272.441	303.62	174.469	228.588	273.036	163.59	262.325	285.59	142.608	186.533	199.391	160.973	251.166	169.678	164.331	278.382	136.838	163.59	226.502
C2orf33	218.098	158.979	274.186	218.552	277.185	389.204	171.398	247.934	250.178	246.947	200.101	215.111	226.25	203.279	253.523	293.787	172.558	205.63	300.905	202.862	246.193	270.411	313.983	263.048	245.231	174.583	181.093	235.118	215.627	139.445	185.273	240.729	255.758	226.574	198.682	197.2	213.874	245.826	165.505	199.888	252.016	197.636	150.211	158.622	186.359	193.321	162.912	182.014	232.489
C2orf42	271.43	330.837	430.039	286.402	292.451	217.187	269.225	274.565	238.859	214.099	219.166	225.091	267.038	351.26	235.993	230.974	201.727	262.019	254.319	306.912	248.971	263.817	507.202	281.412	290.847	350.393	261.031	263.645	208.296	368.739	314.608	298.96	273.24	244.352	278.782	306.912	173.909	310.95	154.867	242.957	311.771	205.054	301.84	268.624	229.435	227.461	260.434	210.693	252.801
C2orf47	250.995	248.355	250.434	270.017	262.325	388.14	226.183	253.437	256.95	270.213	288.394	241.857	275.617	294.041	245.58	217.55	233.178	218.552	311.977	261.817	250.722	295.02	226.727	273.036	244.439	236.801	243.217	256.591	265.546	216.182	293.007	270.914	229.063	226.727	295.257	199.045	226.112	326.89	148.192	221.661	294.788	213.282	221.346	214.242	206.454	257.201	177.54	191.455	210.554
C3AR1	125.743	160.445	212.085	128.516	104.927	75.357	202.608	86.3034	103.694	112.478	284.334	134.59	149.23	239.223	121.901	132.627	187.563	73.5954	92.7259	121.754	97.2669	73.7286	174.632	60.5828	177.424	125.576	136.795	150.211	232.941	258.8	191.156	115.98	95.7978	96.9048	61.5395	144.874	85.0764	152.288	169.738	223.822	135.632	109.538	134.55	83.9937	174.986	170.492	44.784	66.6096	291.531
C3orf1	703.271	833.781	677.53	653.681	896.453	906.95	779.874	846.583	616.29	663.097	786.247	997.347	692.42	915.25	608.153	804.77	812.211	498.052	728.888	607.788	646.519	698.954	520.384	745.304	927.056	821.166	867.834	726.915	721.127	1091.66	1012.83	755.49	751.302	747.212	785.685	782.771	537.846	840.41	888.272	619.687	756.405	1145.14	864.028	969.481	1138.5	792.128	1123.43	952.229	567.679
C3orf10	894.169	744.015	904.529	842.563	834.318	473.271	666.577	331.296	848.128	842.563	581.602	627.94	871.346	735.835	947.681	552.122	744.443	634.479	580.648	598.924	684.354	690.194	694.028	572.401	919.201	740.028	787.708	456.125	612.928	508.723	739.016	838.049	569.429	791.059	904.529	483.137	798.619	1064.59	358.235	689.263	951.035	608.153	703.271	492.169	783.269	755.927	669.044	709.587	653.281
C3orf21	139.712	74.3367	95.771	138.896	97.6753	102.781	264.024	158.463	134.506	127.143	145.512	155.485	123.536	304.572	169.06	130.553	196.665	105.082	155.643	170.314	112.153	123.343	73.3738	157.497	207.793	185.35	181.22	102.656	171.398	168.754	135.012	152.029	137.562	111.867	177.59	117.804	90.286	185.665	153.288	200.432	161.639	201.599	122.174	162.347	153.771	172.51	183.427	164.211	88.6451
C3orf31	91.8628	165.272	134.717	142.282	131.85	135.012	125.287	133.786	95.7374	91.197	128.896	76.9848	96.2788	139.172	78.1141	94.6096	63.108	66.5074	97.3997	80.8155	106.24	111.763	132.204	112.153	85.6424	145.988	108.866	86.3645	78.3693	185.132	175.232	128.896	120.788	107.773	119.654	107.416	73.2484	81.3607	31.2144	74.8475	101.319	87.5406	128.278	65.0568	72.878	128.936	55.316	66.8469	66.2006
C3orf34	302.262	148.445	436.192	207.212	197.907	259.979	202.892	119.745	252.769	273.307	270.464	220.677	161.938	325.461	509.637	426.513	320.669	392.762	378.946	249.258	262.541	323.273	542.439	361.394	252.087	287.737	168.39	288.377	541.211	231.636	194.513	320.318	305.359	356.41	191.713	388.83	156.6	244.852	343.049	287.333	313.585	249.401	187.992	119.403	241.608	174.191	268.758	276.379	400.239
C3orf37	165.393	157.353	108.627	163.044	165.121	141.979	160.556	132.356	130.876	119.161	129.863	156.214	149.343	143.557	141.879	139.029	145.424	117.511	98.4807	161.441	137.535	123.183	120.126	115.367	166.237	211.748	139.583	96.2106	114.645	167.518	193.664	177.369	138.615	135.446	141.548	158.121	122.766	166.504	147.99	144.074	180.682	227.075	170.819	223.065	267.08	146.289	191.46	186.692	162.398
C3orf40	143.056	71.6691	145.468	117.915	113.578	51.8066	122.326	94.7625	98.5338	95.3954	85.4509	120.828	97.9271	143.658	170.904	126.959	160.391	92.088	110.131	134.334	89.8871	78.836	137.935	119.895	139.028	122.326	108.112	77.5944	134.679	124.776	107.085	105.153	105.183	90.8784	115.395	166.639	90.3437	143.57	69.6299	154.135	172.006	131.424	69.5892	74.5997	119.342	96.4336	111.763	119.013	221.438
C3orf54	202.93	147.499	124.903	108.009	105.476	46.2218	123.828	82.5955	98.0524	98.0524	122.945	100.518	128.857	114.152	115.725	92.3746	98.6521	96.074	103.546	76.2595	93.8352	92.3386	39.4604	82.3539	152.572	146.034	133.965	78.4943	71.114	178.158	340.7	130.008	111.251	124.862	111.433	70.4428	104.669	123.794	94.6341	178.385	123.794	102.656	95.0658	90.7899	177.711	149.373	86.0496	99.1838	111.568
C3orf62	77.5474	80.714	140.448	68.8441	71.1999	82.3299	78.7682	79.1169	91.3922	91.1098	67.6894	104.578	72.3114	144.551	85.4509	199.192	137.562	159.539	165.838	115.285	87.4161	109.767	264.024	130.957	64.0308	75.5956	58.0503	138.801	182.86	76.4739	95.1298	50.7874	100.163	85.8768	64.7463	218.163	72.929	52.3377	118.978	126.252	114.55	109.8	73.8568	39.6958	83.2395	74.2178	108.422	106.349	154.184
C4BPA	31.3861	22.291	15.3214	18.5683	20.2548	10.3445	8.18231	342.091	419.035	389.514	114.338	10.4487	18.6039	31.2144	17.519	33.7801	33.4796	483.137	28.4107	568.483	9.22963	4.16897	71.4887	37.5511	38.5447	21.1943	29.4714	9.989	35.3271	14.289	16.8234	26.4064	12.2918	10.7987	14.7295	57.6795	10.1854	52.0338	38.039	73.7507	21.4724	500.399	20.0536	13.0393	38.8843	15.8331	30.37	23.6753	62.8335
C4orf14	513.051	516.721	313.602	532.331	489.194	571.488	369.199	518.529	397.206	406.883	331.972	445.789	445.018	362.054	444.622	445.789	397.544	361.379	543.562	496.123	564.358	532.091	337.593	549.215	460.608	403.819	486.832	416.308	370.097	388.14	386.232	474.696	406.343	549.836	439.622	263.048	453.52	526.837	362.358	287.922	435.842	451.862	426.658	542.632	484.592	426.658	535.416	492.169	278.677
C4orf18	288.732	223.424	436.111	243.261	254.86	363.269	432.909	339.5	272.345	245.757	308.985	268.226	302.89	206.17	556.445	213.531	355.621	203.169	277.058	172.577	352.367	390.058	476.605	237.237	345.305	177.685	221.943	263.387	532.763	258.435	209.963	162.121	416.449	342.244	179.337	199.877	137.647	248.721	362.421	341.279	181.677	176.209	159.088	196.568	308.704	245.424	244.54	241.338	307.501
C4orf20	198.559	211.805	177.478	203.882	208.655	243.706	125.534	195.696	141.955	148.326	180.207	129.764	201.852	185.855	176.026	151.131	140.943	123.06	216.482	208.723	217.121	233.607	214.525	230.106	202.73	175.756	174.986	165.32	111.906	167.113	247.224	251.622	137.888	179.23	184.33	125.034	129.727	238.947	99.7337	111.251	168.754	148.143	170.955	161.127	118.267	188.635	134.717	108.009	110.675
C4orf33	116.64	166.049	194.462	87.4698	130.957	158.622	136.838	161.283	77.5233	81.1439	168.323	83.436	134.926	152.421	117.725	245.396	252.59	76.6082	183.938	95.6735	70.1557	97.0707	186.659	152.864	152.288	123.865	128.44	164.047	210.192	110.003	141.267	80.7883	121.185	100.819	147.44	145.559	102.098	88.534	61.2341	153.486	116.165	85.0208	151.28	72.2697	97.5308	175.352	58.507	69.0714	122.365
C4orf34	1012.83	590.947	1141.39	617.955	1084.74	926.394	743.032	834.318	1050.65	1050.65	1881.38	787.24	824.595	716.427	1133.06	931.764	954.995	1035.24	1011.31	893.638	1028.41	1041.94	1717.2	883.274	922.398	670.454	618.554	914.582	1109.43	671.949	582.885	845.402	899.66	913.372	839.266	856.536	688.503	931.764	773.419	1049.01	1040.24	792.128	704.957	594.051	724.828	677.917	650.12	789.217	1215.95
C4orf8	140.817	137.61	95.8656	131.893	109.062	137.649	139.631	173.215	111.494	117.984	113.951	166.161	116.64	172.738	100.08	198.36	151.365	178.331	199.593	128.516	149.277	147.44	105.024	203.279	127.488	143.116	121.152	148.382	193.645	166.362	143.116	136.138	181.398	134.293	134.378	173.328	120.357	140.767	261.922	146.528	139.122	175.232	178.882	161.736	167.786	122.631	194.66	212.675	179.605
C5AR1	1116.77	1175.73	861.683	965.203	632.484	1476.98	956.465	790.597	1062.84	911.642	820.166	1229.68	715.069	746.245	1081.01	2721.51	2478.39	1192.04	2267.96	1075.99	1018.13	875.35	1173.74	2233.48	875.966	798.619	1340.79	1200.56	1643.24	980.234	608.799	1009.6	1201.83	1979.77	1097.49	1574.53	762.449	990.362	1756.34	1156.03	1294.73	1172.69	1226.84	754.437	990.362	1217.02	1205.76	1085.63	1547.96
C5orf15	994.41	421.096	1133.96	975.375	1148.02	565.801	721.519	954.386	857.626	968.667	1665.35	925.032	1064.59	775.322	973.965	799.611	502.281	878.461	698.143	942.133	908.125	1030.04	879.108	717.277	1174.69	623.027	488.923	702.445	787.24	828.904	755.927	1121.44	806.362	862.217	1032.09	860.392	643.529	1326.39	780.361	504.587	1047.51	900.859	547.071	1044.31	848.128	522.487	937.036	995.069	952.229
C5orf21	286.84	264.475	218.098	265.343	279.537	153.199	175.406	251.722	265.739	239.505	241.518	242.446	279.817	208.655	253.087	295.69	359.135	323.756	255.212	294.041	220.608	227.163	279.198	297.569	240.917	226.331	236.543	325.579	222.398	306.281	240.078	301.315	248.624	241.59	337.451	361.073	153.631	270.312	249.772	350.238	251.528	231.233	256.876	230.595	301.445	236.543	236.9	234.107	333.43
C5orf29	928.403	2069.18	1245.73	849.202	1688.14	1667	1415.16	2602.14	1242.16	1272.32	1071.1	1162.05	1574.53	1262.7	1160.06	1767.63	1416.59	1292.16	1456.17	1457.62	1562.96	1917.26	1347.04	1562.96	723.902	1287.18	1628.84	1050.03	1771.7	767.183	1037.5	1146.06	1357.06	1182.18	985.426	1018.13	1045.85	1255.63	517.447	1097.49	1145.14	629.992	925.032	731.466	985.426	1836.41	1379.73	1353.7	979.559
C5orf30	48.1341	34.1282	123.383	60.7855	38.5091	46.0294	53.1073	48.4312	41.6522	59.7114	46.6307	33.2906	60.4296	52.7682	44.6067	84.7076	46.1518	49.9031	61.2527	40.9474	50.1621	54.6521	238.109	62.196	48.1906	56.4933	44.5774	101.484	84.1539	31.9973	46.8596	60.6613	47.0185	109.275	58.0303	115.465	67.883	44.3198	30.4102	118.026	44.828	39.7356	36.2745	15.9105	34.6877	50.7729	66.4213	69.9764	190.217
C5orf32	784.727	372.939	340.273	514.652	247.836	191.965	733.249	280.005	544.808	502.07	566.462	771.377	269.83	285.812	604.417	827.159	1354.69	661.863	616.679	337.451	318.442	310.703	534.307	521.615	500.146	334.116	330.995	830.068	404.74	752.503	179.485	367.78	753.97	940.821	335.093	917.862	1035.93	415.723	1836.41	1867.32	723.174	734.065	257.04	533.477	523.251	310.315	617.322	619.316	711.879
C5orf4	150.139	611.596	586.317	621.172	434.107	75.0551	332.36	552.436	934.259	827.27	305.593	810.378	260.932	216.274	255.619	223.848	90.9676	384.938	286.286	390.36	180.92	191.524	265.639	289.289	321.929	118.056	183.287	324.8	118.964	520.679	213.26	398.236	284.388	399.375	436.847	445.423	777.827	377.78	319.685	561.943	409.113	272.564	281.05	443.796	236.63	227.198	339.548	340.051	291.485
C5orf5	363.457	267.517	617.322	391.11	394.422	373.442	294.564	568.206	375.181	430.225	384.475	265.06	439.231	292.124	366.946	492.434	317.684	520.123	431.02	465.354	317.078	318.968	660.357	492.908	399.26	335.368	260.631	412.208	444.426	289.243	282.07	431.585	439.622	337.705	398.41	382.346	275.293	418.18	162.696	295.145	418.63	305.439	310.081	228.5	230.974	311.163	248.881	248.709	426.828
C6orf1	635.958	422.726	1478.7	582.963	579.765	363.887	602.262	814.632	473.111	493.44	539.456	660.373	595.499	530.671	769.879	460.399	551.659	420.75	491.393	634.312	586.694	611.983	928.515	659.964	554.79	716.19	527.059	476.088	617.681	777.083	663.635	658.315	647.58	569.042	674.506	469.525	506.26	776.085	576.003	541.59	626.492	583.72	629.865	654.502	623.462	666.343	769.299	799.773	483.557
C6orf105	129.968	44.2794	156.788	143.889	83.141	121.152	29.2454	136.312	90.202	88.5641	31.4068	10.7047	100.263	21.3345	129.356	87.8672	17.1782	32.1911	116.265	70.0615	42.3098	60.0599	45.3015	58.5242	59.5226	93.4468	95.6086	127.521	22.8765	25.976	64.5754	69.6492	195.338	107.552	66.2196	60.1891	23.8538	41.7397	8.4795	15.6126	44.6829	17.4863	45.9988	-0.513477	25.1954	54.5995	8.73107	12.6116	22.9437
C6orf111	706.497	940.286	1543.31	1101.53	917.207	815.424	556.491	748.103	800.264	849.73	719.247	361.203	1005.75	1013.55	882.586	737.664	713.095	750.437	718.111	849.202	788.653	670.881	1290.91	743.032	606.891	711.464	650.438	1014.3	882.586	564.358	845.964	570.31	728.519	499.418	675.645	778.461	567.679	672.294	457.043	624.013	630.36	340.392	831.573	316.694	310.46	730.074	305.302	304.936	913.928
C6orf115	806.881	844.886	925.032	965.892	739.016	1594.73	864.608	1002.79	724.828	769.461	1036.8	520.123	998.07	1019.66	1097.49	1006.36	909.423	661.027	1327.78	888.272	809.47	763.822	1002.02	965.892	876.528	717.666	1093.46	1035.93	780.898	959.131	1151.16	842.084	967.927	985.426	896.453	720.247	805.893	864.608	471.297	685.954	1057.98	590.616	870.831	573.758	573.072	995.886	494.316	459.346	731.466
C6orf125	140.358	116.455	98.5939	154.442	106.478	203.352	202.133	172.178	131.598	139.712	216.106	209.318	170.955	166.853	153.443	147.44	140.039	117.236	208.296	172.439	162.484	160.068	76.6082	204.498	191.724	144.208	229.513	137.888	158.292	169.619	186.097	180.541	138.282	188.181	133.878	83.571	117.491	155.119	160.715	98.712	163.854	210.128	229.371	205.775	226.574	227.163	196.593	189.351	75.9218
C6orf129	185.132	157.993	77.8254	133.159	79.8236	242.603	227.54	218.616	145.468	193.396	142.421	224.467	130.084	141.502	103.389	97.0121	90.1105	88.3313	195.623	144.023	212.597	182.612	70.2642	168.166	165.933	274.47	116.804	128.819	81.0263	135.1	257.201	259.886	108.487	165.569	145.512	88.534	152.234	159.32	129.356	98.4652	130.047	282.722	198.288	421.265	430.432	212.951	229.226	220.608	95.2491
C6orf130	213.433	172.439	228.897	189.286	219.1	246.947	124.204	243.55	280.652	308.661	212.951	177.016	233.952	178.385	167.786	218.163	140.671	238.109	230.027	207.674	266.393	332.358	197.374	234.946	240.401	197.571	200.432	191.773	175.166	130.842	248.275	251.336	173.909	216.271	189.762	118.108	205.35	272.548	143.938	127.374	223.984	228.407	181.511	189.69	170.314	202.133	189.351	166.207	177.36
C6orf136	318.681	427.864	165.622	319.476	330.441	219.773	307.025	212.148	250.722	296.856	252.801	309.963	319.611	290.302	256.591	239.319	341.402	278.065	238.541	301.445	359.764	306.172	125.445	255.314	307.951	361.903	428.601	215.788	201.727	286.15	270.816	395.256	215.185	316.694	329.771	219.706	219.166	348.437	251.26	297.926	360.331	316.694	438.826	328.861	278.065	449.953	317.961	345.485	273.638
C6orf150	67.3188	41.9669	61.1399	67.2103	95.1599	74.1181	19.026	126.529	67.7337	85.2321	275.917	138.363	90.3157	52.6886	96.3695	29.4225	45.4941	74.0692	23.903	87.1922	54.9859	67.2951	65.756	31.0819	77.6747	47.1363	52.2753	157.738	234.466	179.106	63.4902	63.8092	112.794	54.8674	45.3546	62.8141	47.7261	85.9801	61.6403	90.5607	58.909	157.289	95.2491	124.019	139.67	59.2106	194.133	190.715	79.8236
C6orf153	504.014	465.787	851.894	584.867	480.284	415.538	693.668	519.55	446.16	376.341	520.824	526.267	601.028	660.357	554.645	406.165	485.344	376.708	371.863	572.401	480.541	413.296	753.97	394.61	512.73	894.169	515.674	428.601	485.344	762.449	783.761	529.033	404.948	390.025	472.992	472.992	369.199	584.867	416.308	603.432	458.253	584.534	609.235	536.267	670.146	453.967	592.116	550.411	453.316
C6orf160	447.574	639.831	664.621	681.765	347.619	2848.98	601.326	1363.83	701.582	541.533	469.584	466.883	787.24	909.423	763.822	1025.1	849.73	348.891	2716.96	519.853	488.274	504.297	305.696	1485.78	333.692	666.227	1038.06	557.682	1177.87	288.608	677.917	671.185	1237.61	1035.24	688.901	410.241	392.591	713.906	371.408	572.062	415.538	248.447	937.036	408.603	281.088	505.492	459.346	468.877	242.869
C6orf166	1144.04	918.537	1482.6	1021.24	1105.15	1063.65	635.162	992.509	1198.65	1249.18	1632.34	931.109	960.567	897.081	1192.95	1699.47	1214.86	1332.55	1434.69	1164.79	1005.75	1124.13	1190.01	1273.4	1122.52	654.38	764.775	1088.16	1541.66	958.512	846.583	1228.77	1274.43	1441.44	954.386	1310.61	1111.84	1126.6	1274.43	849.202	1077.75	762.449	765.867	612.629	936.474	846.583	773.885	821.762	1625.17
C6orf190	165.452	203.825	155.643	188.454	185.477	126.174	97.8887	241.95	172.671	143.015	149.633	123.343	236.543	156.743	163.649	102.43	32.3222	175.81	153.537	215.788	136.479	167.947	188.562	207.152	177.59	157.351	168.96	118.507	73.3966	153.486	231.898	285.167	112.93	151.546	203.124	118.978	113.223	231.313	74.5997	117.094	132.204	125.98	132.416	141.373	176.612	122.401	87.9613	75.3784	74.2651
C6orf192	255.675	267.125	277.957	316.694	318.968	198.89	333.014	243.98	259.511	271.738	159.083	303.98	330.578	214.242	266.29	120.709	124.74	213.874	206.249	234.395	246.365	239.916	370.905	259.425	285.273	286.721	209.394	273.638	197.2	303.98	269.328	274.373	284.334	243.98	192.634	288.91	766.346	266.757	205.566	173.909	186.173	257.404	219.542	370.247	206.099	177.644	248.524	253.349	243.619
C6orf204	57.6795	58.2804	42.6379	97.1725	79.7033	105.912	57.252	110.131	136.094	156.641	54.4797	32.7045	102.487	75.8678	49.3369	30.4711	37.8401	149.184	73.8987	105.877	171.225	170.003	95.5143	77.0117	87.4458	44.4986	60.8017	98.3676	97.5576	43.0284	82.1405	69.4185	91.5206	46.6307	87.6471	57.0422	23.6129	101.641	3.08304	59.4269	99.0874	40.0211	40.6907	30.825	67.6463	61.7604	52.9579	58.7869	68.9781
C6orf21	179.851	235.887	99.546	122.671	91.0224	37.8043	111.114	52.7843	135.452	160.817	93.0448	52.2911	109.353	90.8189	158.51	165.994	46.3486	54.4249	199.255	46.574	106.44	101.972	53.5271	79.6172	115.465	64.5116	135.147	53.7555	64.2368	129.968	99.2991	147.44	118.939	202.406	147.651	60.326	141.999	86.5857	105.844	110.675	148.382	89.9454	64.9727	75.4053	135.055	151.365	77.2112	57.2188	70.6427
C6orf32	4884.24	6316.62	3607.69	4598.49	5471.53	3694.3	7187.35	4310.49	4264.25	4419.06	4740.64	6084.23	4531.02	6913.4	5471.53	6210.52	8547.66	5016.43	4054.9	4150.38	4419.06	4385.86	5529.06	4884.24	4188.97	7111.69	5953.5	3158.25	5086.02	5182.07	5070.67	4924.69	4408.23	4365	4439.49	9622.84	4120.54	4429.51	6643.65	8506.43	5227.23	5288.69	6483.1	4846.55	5349.68	5787.76	6665.06	6603.65	8989.69
C6orf48	239.223	164.961	165.725	219.773	145.512	154.579	270.213	199.521	217.482	188.635	87.4935	233.692	236.172	231.148	207.793	137.097	169.851	136.312	167.576	224.298	208.448	202.999	151.084	174.023	214.177	394.61	239.994	158.292	134.134	221.058	314.213	229.948	184.061	172.374	290.402	117.236	105.949	208.077	157.043	174.412	192.088	280.563	193.066	332.594	190.485	206.249	248.709	263.923	119.858
C6orf49	1192.95	1177.87	1110.27	1395.65	996.582	1451.42	1782.23	1684.1	1408.02	1353.7	1186.55	1788.54	1580.9	1408.02	1361.28	809.47	1250.36	903.17	1387.66	1318.62	1433.28	1359.77	987.631	1549.73	1353.7	1551.03	1780.24	1319.8	1021.24	1403.97	1471.05	1613.14	1426.1	1434.69	1432.13	831.573	1831.64	1299.72	1012.83	966.496	1493.3	1543.31	1751.77	1824.89	1317.17	1618.26	1336.53	1300.84	709.189
C6orf55	346.678	313.23	402.02	364.836	466.883	364.389	304.437	432.666	330.995	336.428	411.115	314.339	417.573	281.976	381.057	387.229	337.705	315.671	362.358	388.525	345.902	372.665	453.52	393.274	365.001	330.699	316.577	366.107	364.062	272.641	286.617	408.069	345.153	429.021	433.29	405.471	326.394	368.391	281.885	343.227	446.712	302.758	268.329	274.978	261.396	309.055	291.759	283.269	407.905
C6orf62	2180.75	2344.05	3139.78	2999.3	3899.76	1788.54	1534.59	2490.14	3403.34	3459.19	2972.96	2015.02	3013.66	1619.79	2496.64	2270.89	1402.6	2926.47	1804.54	3109.82	2239.83	2972.96	4054.9	2784.93	2858.38	1321.19	1479.87	2661.5	2131.14	1482.6	1822.41	2963.13	2320.07	2102.11	3158.25	2478.39	5580.41	2178.39	1358.41	1410.9	2636.03	1883.59	1444.44	1888.19	1289.62	1674.62	1355.92	1370.82	2747.71
C6orf72	545.084	550.902	608.482	695.605	756.405	785.177	580.648	683.936	684.354	765.287	544.539	610.197	813.776	499.165	722.752	519.048	609.597	868.986	660.357	846.995	894.771	1143.22	788.653	474.45	623.634	658.502	539.299	631.857	946.282	620.337	528.49	508.262	714.675	682.162	771.377	692.42	494.006	690.86	384.298	895.372	746.245	609.235	444.24	511.125	560.532	573.418	716.427	752.054	650.76
C7orf23	429.659	490.58	572.062	583.946	567.356	919.863	418.18	474.203	598.582	538.465	400.414	365.815	609.235	431.205	527.066	442.145	369.199	386.358	604.417	630.36	514.111	552.977	554.106	620.021	490.829	484.109	513.542	362.976	351.866	369.043	426.075	623.634	498.914	652.834	540.126	403.277	325.579	510.332	233.863	364.688	483.865	423.383	427.454	359.286	379.359	450.818	353.943	316.816	316.947
C7orf25	198.957	236.077	237.847	190.649	210.128	124.903	137.284	148.143	237	222.966	144.3	147.499	179.967	161.78	221.202	262.837	322.791	145.693	185.273	190.909	179.851	194.062	237.847	177.82	209.457	135.012	245.826	281.188	180.207	118.673	172.439	269.643	143.116	205.63	181.573	231.744	172.894	191.031	145.418	207.93	309.963	157.351	146.618	140.124	124.164	190.649	227.683	259.606	247.415
C7orf26	382.02	674.766	269.438	343.82	371.719	500.653	274.286	398.23	335.642	341.971	289.243	367.426	335.368	257.201	286.034	479.328	427.658	390.025	457.437	317.407	361.903	362.054	247.145	475.804	301.588	340.273	441.751	425.448	396.575	324.809	299.639	347.233	347.108	640.859	331.815	215.858	350.393	302.402	428.031	317.407	305.933	407.055	515.883	394.422	314.213	550.902	349.832	379.947	277.303
C7orf27	1052.28	803.362	681.044	943.551	931.109	299.891	1036.8	627.228	735.835	704.512	806.362	726.915	900.859	718.868	941.437	501.806	736.729	650.438	417.573	858.265	784.2	599.767	605.985	423.587	1057.98	1155.07	840.41	501.363	703.271	744.443	659.943	884.585	752.974	605.985	927.867	568.483	593.372	815.948	750.882	1032.88	860.392	681.765	769.461	795.07	787.24	683.936	795.07	800.856	764.775
C7orf30	848.727	766.792	592.747	656.559	547.939	786.247	664.621	589.949	676.787	690.194	639.831	691.212	685.954	688.115	681.347	739.525	907.452	541.533	758.928	667.956	734.449	768.107	669.044	755.49	688.503	729.282	879.108	608.153	586.07	616.29	785.685	734.449	646.908	830.068	763.822	427.025	592.48	685.538	657.719	779.319	586.07	739.016	715.957	622.325	702.445	842.084	692.858	581.602	765.287
C7orf38	3068.34	6210.52	3600.77	3644.53	2972.96	5002.84	1650.69	4484.88	4310.49	3532.82	2140.69	2180.75	3116.46	5272.22	2631.34	4033.76	3580.08	7410.55	3854.88	3629.59	4577.18	4310.49	3994.4	3932.81	3282.71	3122.33	4964.18	12006.8	8473.48	2794.43	3396.65	2609.91	5118.26	2597.38	2839.32	2572.54	3681.08	3041.25	2044.83	3328.79	3673.32	1309.53	7877.18	1853.99	1218.14	5771.97	1580.9	1645.19	4331.3
C7orf41	692.858	2107.91	1769.65	1520.45	1252.3	610.197	1218.14	845.402	1079.34	1161.09	795.559	817.432	1630.58	959.131	1432.13	1283.6	817.973	1002.79	2012.06	1148.02	954.386	864.608	1130.29	981.785	739.016	1031.29	937.601	1078.51	696.908	1365.36	1526.82	1217.02	1030.6	1169.58	1239.61	1030.04	2180.75	903.17	1349.86	1507.5	780.361	664.621	974.684	1060.47	1398.22	1104.38	865.272	897.081	1196.64
C7orf47	1218.14	810.519	1464.99	1042.81	824.077	673.935	1223.75	948.397	784.727	784.2	727.285	881.852	1007.92	1376.65	999.737	671.185	941.437	594.39	815.424	927.867	792.597	701.582	1531.43	783.761	927.867	1544.74	768.556	753.97	690.546	1499.61	1355.92	1018.94	721.519	779.874	1030.04	1044.99	636.572	1085.63	1061.3	1229.68	1029.23	1007.92	895.93	1223.75	1113.86	908.125	1043.54	1063.65	877.183
C8orf40	366.368	349.345	278.876	344.55	350.966	312.861	233.109	278.481	371.228	370.905	376.708	214.676	443.828	263.425	313.23	268.42	244.901	264.581	369.199	335.9	322.137	356.917	247.316	301.445	337.451	330.441	312.225	369.043	243.379	242.367	258.8	450.149	283.488	327.147	294.041	124.945	288.819	373.74	124.817	260.631	369.479	258.697	368.739	259.058	204.705	322.017	197.571	205.914	298.042
C8orf41	301.588	344.294	282.722	356.583	357.802	230.747	348.437	311.062	254.767	264.772	303.014	419.797	350.531	344.418	346.803	305.302	324.666	250.53	307.505	350.815	301.588	300.448	357.961	343.227	315.01	351.12	315.527	242.703	282.07	411.312	358.979	343.82	275.712	296.856	359.913	431.408	207.516	366.513	286.84	261.488	337.178	367.426	315.151	290.644	336.736	352.03	368.245	389.875	284.334
C8orf55	436.842	311.29	415.151	467.534	440.25	217.957	522.487	460.837	347.619	368.887	309.837	532.629	396.575	560.532	368.391	227.461	241.857	198.22	258.325	405.295	264.202	272.548	358.84	266.591	448.974	700.33	349.482	258.21	238.541	772.42	850.816	394.61	385.55	236.077	415.538	560.532	234.946	473.751	360.064	391.488	308.781	632.156	419.035	646.128	656.93	392.02	548.2	498.052	176.026
C8orf59	544.808	383.848	620.728	490.829	341.134	1005.09	583.61	912.748	463.874	472.707	579.773	364.389	750.004	513.542	610.887	487.768	498.252	521.133	877.183	600.439	637.941	654.045	490.829	778.461	488.274	555.342	684.354	712.189	716.427	426.075	666.975	582.885	730.074	532.629	571.76	353.525	257.404	565.801	196.334	385.104	694.429	330.578	525.75	342.091	382.853	699.886	363.146	335.368	353.083
C8orf76	540.716	552.705	548.539	603.093	642.305	391.851	562.572	357.961	429.235	532.331	672.722	553.261	597.664	597.956	627.613	448.547	562.314	475.391	402.926	605.372	468.645	491.285	524.6	418.847	597.044	587.005	535.973	418.847	470.84	528.231	505.733	547.352	479.813	522.159	471.747	505.256	417.016	669.044	433.515	564.358	594.716	537.088	615.265	535.143	584.534	589.949	566.462	506.978	560.213
C9orf103	180.839	166.735	121.08	194.462	208.296	231.408	123.147	225.872	156.95	165.222	159.801	164.484	199.815	113.426	161.736	183.534	142.172	124.631	195.566	133.106	202.608	223.195	126.686	225.253	210.264	169.009	234.107	120.277	103.021	150.837	209.109	277.185	159.376	186.173	208.077	102.55	183.778	181.031	245.231	192.392	205.054	148.48	197.699	167.786	164.047	190.715	136.64	148.326	112.368
C9orf114	193.779	172.894	262.019	191.583	145.383	124.019	307.951	217.332	155.903	167.729	196.536	280.451	187.247	278.561	174.632	138.196	140.216	104.539	131.424	183.24	176.792	180.357	178.502	184.061	204.498	345.153	180.477	173.215	152.864	412.002	328.724	184.33	159.482	153.828	170.003	239.139	143.938	213.282	197.902	192.321	143.889	347.473	269.225	412.408	322.137	211.946	255.397	285.273	104.504
C9orf119	282.722	208.234	278.677	223.119	168.814	172.374	196.928	160.391	215.402	245.659	200.153	188.951	218.935	167.786	240.168	287.154	218.868	150.031	304.07	161.736	206.95	212.085	172.374	203.059	234.395	220.539	272.323	161.39	155.542	224.221	253.623	278.286	181.511	242.8	220.464	145.34	202.483	262.933	247.934	192.266	254.319	208.836	206.748	201.599	258.8	243.294	183.884	218.796	248.188
C9orf130	117.804	120.93	226.891	136.009	95.2206	107.117	168.754	233.27	181.459	136.179	78.7167	174.52	104.8	295.581	132.25	149.23	175.651	279.293	158.979	152.572	171.957	142.739	279.723	134.55	124.463	244.901	198.36	322.137	300.012	309.055	273.727	100.009	296.634	56.6253	126.02	273.638	58.8247	133.585	184.001	224.707	108.356	214.464	306.523	283.694	220.608	226.417	267.413	303.856	141.873
C9orf142	615.627	1054.7	214.464	547.352	613.283	545.084	845.402	723.549	640.171	667.621	690.546	995.069	581.924	788.653	498.052	717.277	590.616	509.791	1081.01	571.488	765.287	807.392	228.104	1206.86	602.408	1021.24	871.346	519.273	382.853	1092.62	891.825	864.608	514.894	888.795	719.719	473.751	795.07	671.949	957.229	681.765	645.765	1315.99	1193.83	1459.02	1095.03	970.092	987.631	999.737	380.88
C9orf156	406.883	401.117	427.454	390.025	402.376	317.961	384.795	457.811	423.587	403.653	302.178	406.722	372.796	413.648	419.403	539.569	459.346	359.135	463.226	411.115	386.358	438.633	359.135	398.972	367.78	466.016	377.377	322.017	391.851	418.18	399.431	380.093	389.514	431.205	427.025	493.36	251.528	415.93	438.633	441.092	424.354	513.051	342.523	435.436	435.656	377.377	547.352	520.123	391.317
C9orf164	318.968	429.021	358.096	272.827	248.524	274.565	442.769	285.273	314.734	321.771	366.946	493.59	258.124	567.679	309.595	615.938	682.162	492.169	560.532	353.384	274.789	293.241	327.411	542.346	364.228	340.132	358.384	441.328	538.697	248.188	310.561	316.067	487.768	367.601	330.077	589.187	399.119	341.971	655.85	344.418	337.851	379.81	471.056	295.949	394.248	479.328	482.63	474.947	626.895
C9orf167	73.2709	50.9589	62.438	70.2027	86.3356	61.4999	82.7696	112.368	89.7613	96.4922	124.584	180.839	70.2027	109.538	79.6172	98.6521	86.7715	151.84	107.835	85.4509	93.1236	133.06	55.4046	67.2511	90.1105	55.8792	44.2302	172.118	187.997	150.606	77.144	66.91	147.094	126.103	86.4774	83.7346	60.326	75.1557	410.428	62.6118	66.6319	140.414	105.407	166.58	144.696	52.9389	186.771	195.949	88.1078
C9orf19	7381.82	5929.77	10666.7	6625.08	8155.34	4062.62	8324.22	6689.85	5971.76	5929.77	9569.92	7990.94	6965.92	8393.89	8393.89	7954.86	8254.72	6830.43	5378.32	6830.43	6550.43	6151.17	11276.4	6342.22	7567.94	7266.94	6103.57	6025.13	8734.98	9777.65	8429.52	6830.43	7135.6	6294.06	7266.94	10077.1	5408.21	7750.32	10332.9	8583.21	7111.69	9038.94	5822.75	7721.78	10283.8	7532.98	9777.65	9828.77	7750.32
C9orf23	210.202	246.435	116.351	184.336	180.049	207.22	260.758	187.011	202.374	219.644	195.125	179.503	189.49	235.16	200.275	235.245	288.59	174.151	213.212	191.051	236.335	254.869	96.5128	175.526	197.566	235.439	258.934	152.176	184.152	189.804	216.725	210.113	167.699	210.345	165.595	141.894	171.102	235.783	264.571	198.093	184.648	320.651	268.27	232.285	283.438	282.177	241.77	260.734	160.442
C9orf30	174.255	198.22	312.48	174.583	152.666	155.7	103.605	141.047	176.251	178.699	141.999	81.9661	222.132	110.282	142.282	154.867	82.0948	91.6435	253.931	115.646	148.803	181.16	163.854	162.637	137.01	86.6128	155.485	108.39	91.3094	151.41	140.489	170.2	153.973	186.719	175.81	113.817	141.787	133.373	87.4698	136.838	179.967	77.6747	101.81	45.4941	99.8866	150.072	91.8628	62.4722	132.707
C9orf37	121.535	96.2788	209.742	94.7974	103.727	42.0763	154.817	87.4698	67.171	89.3944	86.6391	89.5112	119.231	134.679	102.781	57.6605	66.5266	51.1604	55.0871	89.0482	78.8126	75.8678	181.573	67.6894	110.353	171.589	89.2466	47.8879	54.2339	167.4	173.328	105.949	66.3628	54.1427	91.2501	97.9892	69.5892	131.734	78.3693	151.28	79.3175	112.683	115.206	127.989	145.902	93.5899	104.465	121.08	80.8623
C9orf40	97.2309	95.9859	122.209	115.431	120.788	68.4494	73.7507	104.14	117.648	126.252	79.4165	87.3391	117.984	75.5038	140.216	63.8988	81.6295	97.7702	61.1219	109.503	85.4167	80.3137	88.4132	106.478	119.818	72.0899	98.428	151.039	76.4035	89.1334	115.939	113.701	212.753	108.985	103.289	151.28	575.582	115.366	73.0143	122.365	76.2316	58.4516	75.357	84.7867	107.866	111.867	70.6219	70.5321	109.538
C9orf45	85.334	132.627	44.3198	141.594	166.853	74.0692	86.4464	70.3072	56.8473	66.2006	57.8784	117.764	157.993	91.2744	105.771	86.3034	87.6471	95.7047	65.1	126.296	83.8501	84.3426	54.4596	79.5922	92.0535	161.78	200.975	43.2275	10.472	203.199	126.959	102.82	70.7701	55.6405	95.1599	121.271	52.544	67.1104	67.7563	71.423	40.9344	85.619	123.865	169.619	108.833	165.725	79.8236	81.6765	61.4999
C9orf46	311.547	284.226	297.228	323.756	290.302	460.608	245.659	404.74	346.201	384.141	540.716	302.294	346.678	289.94	246.436	323.657	330.995	228.031	454.39	308.074	325.579	348.189	347.752	359.616	350.66	325.725	283.384	253.011	209.964	311.66	337.851	412.93	276.377	291.869	306.051	202.608	219.1	312.953	337.331	309.963	261.817	371.228	305.439	309.595	504.297	343.366	275.917	290.173	289.467
C9orf5	140.172	205.268	247.415	193.321	144.596	315.151	129.356	189.956	136.179	116.674	108.567	92.6177	139.445	139.54	140.262	144.551	95.3075	141.179	218.935	160.185	141.551	130.587	178.442	235.22	189.02	137.182	146.131	208.776	123.147	71.8374	169.453	186.481	237.693	121.341	152.329	73.797	360.635	128.077	51.0983	60.9661	119.342	81.2512	155.389	112.753	80.9722	131.089	67.9535	76.45	111.318
C9orf66	131.298	57.2369	197.505	111.114	103.353	74.1932	130.008	105.844	102.889	112.823	193.128	121.862	106.068	155.485	181.337	181.22	169.341	113.034	85.3598	120.277	67.0162	95.9263	248.881	90.0029	142.739	76.5157	79.9177	132.17	172.894	154.867	88.0197	90.4672	135.887	93.1866	91.1098	214.894	95.1298	179.605	91.7131	194.871	88.5641	98.7732	83.8772	49.1388	113.114	101.871	69.6492	88.6451	219.773
C9orf72	96.5467	86.8082	301.486	97.0406	166.486	145.392	143.328	169.416	130.21	127.91	158.41	125.575	143.139	169.541	158.724	289.92	259.479	143.583	165.874	104.017	97.0367	126.135	341.935	190.678	122.217	148.351	103.4	220.422	249.592	99.1371	128.22	106.506	243.593	125.56	83.5457	216.117	66.0009	133.174	143.818	180.044	117.184	130.918	65.9705	74.0639	128.691	163.933	100.832	98.5454	121.267
C9orf78	1796.3	3709.1	3188.66	1604.74	2983.86	1460.61	3747.39	2878.79	3694.3	3681.08	2910.97	2470.68	3362.25	1571.15	3532.82	2215.63	2200.05	3170.44	2803.71	2111.13	2789.73	3109.82	2972.96	4171.22	3181.85	2942.43	2548.59	3732.41	1290.91	3090.07	2414.83	2584.98	2999.3	2669.88	3240.58	2869.39	7687.31	2889.43	2042.46	3212.91	2972.96	2588.38	2937.38	2042.46	2026.36	1995.83	2015.02	2091.1	2316.63
C9orf89	520.824	487.986	333.014	312.48	229.371	262.553	586.673	255.758	458.906	467.086	266.832	448.974	439.412	464.931	397.069	420.16	638.707	371.863	625.178	232.212	432.456	380.521	297.228	373.442	445.592	442.562	436.666	304.189	398.41	467.534	600.439	463.649	510.599	676.034	352.149	367.601	358.384	426.258	742.574	648.967	369.938	597.34	392.758	381.057	740.544	439.622	592.747	477.224	346.368
C9orf95	290.961	205.63	292.882	257.748	362.054	155.998	277.625	187.493	166.103	119.818	249.421	206.099	217.482	263.923	185.855	253.255	242.603	135.509	297.332	258.981	170.642	109.024	190.782	227.312	385.749	419.403	232.489	190.715	190.649	206.099	315.798	277.534	140.489	192.567	114.23	375.841	191.833	281.088	131.175	389.204	254.226	165.674	150.388	150.652	267.604	214.676	148.143	127.274	153.443
CA1	728.139	3018.5	5672.37	7212.24	3994.4	454.6	2539.6	2379.75	4585.53	5016.43	1921.38	5564.32	1949.72	874.854	3068.34	1152.07	1041.02	4243.66	1219.32	2609.91	1205.76	1231.98	3139.78	2652.84	2900.22	744.015	1915.12	14886.6	923.09	1442.97	1384.8	2740.2	5653.01	3322.24	1901.85	4090.53	22642.3	1491.52	3580.08	7187.35	1849.69	1282.55	1175.73	2693.89	1833.94	905.203	2267.96	2173.14	3512.19
CA2	1979.77	1813.36	1531.43	1029.23	1016.42	2042.46	855.427	1081.83	1984.12	1813.36	1146.97	901.463	1851.79	1028.41	1498.04	1176.8	600.075	1684.1	1475.39	762.059	1689.84	1840.57	776.815	1321.19	1883.59	779.319	2055.45	2290.03	1040.24	839.772	481.96	1933.93	2147.84	846.583	1695.42	944.9	4484.88	1939	849.202	972.067	1192.95	1162.05	641.572	431.585	426.258	1110.98	966.496	961.204	1403.97
CA4	1908.11	483.865	1068.91	594.051	559.293	128.516	1272.32	346.368	624.323	599.474	611.22	1412.36	872.509	793.455	1226.84	1450.26	1688.14	558.331	445.592	1092.62	284.226	251.812	2267.96	661.863	581.924	708.29	514.111	697.297	762.913	2150.54	721.127	1017.25	797.111	686.399	1068.91	2631.34	707.351	1409.48	2142.91	3109.82	1177.87	1099.02	294.665	1143.22	1618.26	880.833	1330.14	1464.99	1230.82
CA5B	153.244	121.754	70.2859	146.618	149.633	156.387	71.0307	167.947	178.882	160.611	100.92	94.1434	138.15	81.6537	171.765	239.994	54.5508	151.317	182.86	191.211	191.211	196.148	75.182	167.288	182.86	118.383	126.49	190.089	89.4233	77.8003	80.3137	224.135	165.838	192.634	129.057	72.1834	89.0482	123.453	24.9816	75.087	135.77	90.5024	159.968	70.7252	85.2321	122.442	55.5914	89.6219	97.9271
CAB39	6168.61	4613.25	4767.02	4989.72	5241.46	4150.38	3282.71	4598.49	4670.52	5210.44	4355.16	4644.89	4740.64	3762.35	5131.64	6365.82	5529.06	5118.26	4264.25	5771.97	4924.69	5507.83	6046.33	4531.02	4509.62	3485.06	3949.22	4233.01	5041.33	3732.41	4090.53	4054.9	4531.02	4540.96	4924.69	5580.41	3308.07	4975.43	5564.32	5288.69	4577.18	4550.96	3966.94	3755.13	5227.23	3709.1	4644.89	4376.25	6938.56
CABC1	701.106	728.519	575.864	632.484	520.605	562.011	461.546	461.31	626.895	581	341.842	861.023	669.743	519.853	564.358	679.098	688.503	496.123	476.739	621.985	730.598	721.931	584.867	809.956	631.082	516.415	667.621	515.348	692.041	494.006	516.415	558.331	464.537	823.52	657.719	414.428	511.392	749.038	735.835	606.891	570.011	751.302	724.828	668.354	603.769	600.439	1052.28	984.727	608.482
CABIN1	258.697	748.103	80.1698	232.691	250.995	373.909	239.843	206.174	244.256	211.74	104.769	248.881	194.66	195.501	222.488	511.633	292.552	256.202	341.682	265.445	336.428	323.266	131.006	325.213	250.345	215.788	509.554	150.072	283.804	180.904	141.135	260.434	147.136	626.582	290.961	269.742	284.834	178.99	233.27	345.767	280.122	204.297	480.957	209.457	254.671	345.902	344.294	331.429	366.513
CACNA2D3	99.3999	70.9382	283.804	83.571	90.4021	46.1651	67.6667	69.3062	66.9695	66.3803	55.2284	80.0401	78.4687	125.36	72.7187	79.6172	76.8093	52.7343	142.697	99.368	99.9791	102.686	174.469	120.709	102.129	73.1062	104.245	62.317	96.9778	49.3052	71.6932	97.1064	52.7843	105.374	79.9177	27.0766	38.609	133.711	52.26	63.5855	101.972	63.3732	78.5698	100.786	15.4796	95.8656	74.1932	93.3265	42.5331
CALCOCO1	146.666	233.607	64.3125	157.093	130.627	179.23	189.02	195.566	169.501	173.056	104.041	192.205	110.582	148.946	152.288	326.394	232.489	189.903	296.525	143.477	172.065	160.86	73.0857	231.313	126.49	121.977	198.754	188.635	235.887	111.494	86.5338	145.796	208.578	192.321	140.712	130.422	162.637	141.703	261.817	179.915	139.803	193.461	204.498	163.539	164.534	195.264	196.992	223.748	179.775
CALCOCO2	131.598	117.841	221.805	137.562	132.931	65.0568	141.047	98.7431	156.046	155.432	274.47	136.64	114.372	217.719	148.143	151.365	118.939	160.665	104.868	123.023	119.342	116.199	222.191	130.877	183.24	130.084	125.034	130.764	152.329	119.342	89.7359	180.021	114.588	140.082	140.817	182.916	233.445	163.805	136.514	169.678	185.855	136.838	147.734	100.044	122.244	144.962	134.59	130.119	299.41
CALM1	2119.76	3491.84	2196.73	2652.84	3068.34	2463.14	1599.5	2734.75	2593.06	2803.71	2362	2340.18	2704.03	2173.14	2747.71	2055.45	1820.46	2593.06	2552.65	2734.75	3227.22	3587.28	1931.32	3018.5	2183.75	1921.38	2421.98	2848.98	1512.17	2293.22	3314.37	2910.97	2414.83	2483.01	2693.89	2039.64	2568.16	2158.67	2190.39	1705.67	1867.32	2486.87	2631.34	2878.79	2916.79	2362	2467.46	2316.63	1475.39
CALM2	4264.25	4033.76	7914.15	4344.26	4951.22	6992.39	3580.08	5334.37	4281.64	3716.6	5196.71	3322.24	4310.49	5317.41	5002.84	7266.94	4397.42	3694.3	6575.1	4509.62	4140.52	4598.49	8055.38	6888.34	4681.66	3607.69	4496.64	5633.36	7567.94	3219.32	5771.97	4120.54	5166.68	3747.39	4131.46	4728.31	3932.81	4623.67	2508.7	3792.89	4939.17	3246.24	4188.97	2921.73	3090.07	4273.9	3128.23	3472.43	5056.65
CALM3	3932.81	4897.01	1788.54	4140.52	4531.02	2968.1	4681.66	4884.24	4550.96	4613.25	3701.61	5227.23	5131.64	4131.46	4472.42	3417.27	4439.49	3369.15	3258.25	4044.3	4657.01	4924.69	1220.24	3644.53	3975.6	5804.34	5166.68	3369.15	3571.61	4264.25	5737.73	3975.6	4871.11	3839.09	4385.86	3349.1	3659.42	3932.81	5822.75	4752.94	3376.55	6025.13	5546.4	4897.01	7990.94	6103.57	5737.73	5334.37	2878.79
CALML4	145.335	110.215	197.911	161.047	132.345	125.816	349.71	161.514	158.183	173.703	191.959	299.615	137.282	261.165	245.463	163.577	213.435	167.847	160.72	117.975	180.078	173.953	168.449	128.112	208.524	230.513	169.924	142.057	319.031	192.994	171.946	116.517	172.909	156.187	134.297	225.532	147.194	195.956	303.473	246.884	160.884	244.07	207.78	275.631	231.93	145.982	273.416	302.485	215.091
CALR	493.36	385.104	287.353	478.401	276.789	1021.24	615.265	591.241	519.273	439.231	765.287	576.735	498.914	530.475	491.513	375.656	529.033	437.41	460.009	511.125	499.916	406.883	303.13	425.626	575.864	579.178	673.497	439.231	417.573	541.233	585.167	567.679	460.837	455.455	467.534	254.671	648.593	468.252	402.926	434.497	601.028	497.545	814.909	1042.81	656.559	753.529	615.627	629.313	400.256
CAMK1	144.45	203.279	71.1999	145.851	239.415	195.765	229.763	513.823	277.534	313.483	154.027	223.195	116.674	157.904	126.838	183.474	112.478	144.833	226.727	180.207	269.83	271.022	15.5021	254.671	212.875	180.418	276.022	158.724	269.924	141.916	112.259	134.334	235.887	189.414	142.172	27.5713	116.757	176.74	258.981	47.608	116.265	169.234	299.29	289.94	250.631	275.812	208.776	195.06	87.9269
CAMK1D	362.072	291.925	213.484	272.935	300	137.753	205.077	228.178	394.838	356.791	205.107	214.31	202.881	148.238	443.206	366.636	219.804	618.933	245.246	260.058	329.904	311.739	304.578	132.269	210.23	173.283	166.786	171.398	355.995	182.827	139.273	223.356	191.795	321.186	245.73	408.459	138.313	237.48	190.105	296.425	359.25	247.695	248.137	157.283	272.182	145.303	300.76	277.056	332.032
CAMK1G	12.0015	29.8012	15.7106	20.4423	20.0972	502.563	15.554	20.2902	9.49994	9.29229	12.5291	21.4194	30.9594	15.6126	17.5403	22.458	42.1164	10.3287	25.8235	17.6103	14.7361	11.3168	8.02332	20.0864	18.1192	15.6735	28.8203	19.0195	22.0454	21.6296	100.009	24.004	13.1831	13.8892	18.9291	20.4581	14.7016	10.1562	4.77294	11.706	14.0076	11.17	26.546	10.0244	10.0547	84.6213	7.33361	10.4856	11.7685
CAMK2G	822.915	706.939	515.124	613.871	731	470.331	647.346	675.188	785.177	687.678	445.965	640.171	667.621	591.831	746.245	862.792	915.25	817.432	711.879	813.251	793.073	750.004	734.065	671.949	633.517	782.253	652.834	584.867	922.398	567.356	487.065	678.302	781.26	626.246	673.168	750.882	547.071	835.934	800.856	844.361	861.023	870.159	694.774	697.722	785.177	726.131	923.729	916.588	968.667
CAMKK2	293.787	148.573	124.549	92.088	281.702	229.948	683.474	395.426	553.803	524.6	156.149	137.562	208.448	264.288	286.15	176.026	909.99	867.834	46.6959	166.692	492.908	529.91	689.263	255.935	257.486	322.657	307.14	212.951	285.59	549.215	101.09	61.1947	315.151	341.262	135.816	307.619	146.276	221.805	124.094	475.391	299.41	161.78	276.377	132.8	453.699	224.221	350.087	403.477	177.59
CAMLG	1976.93	1559.39	2231.01	1883.59	1724.73	1444.44	1628.84	1892.77	1733.14	1892.77	1520.45	1333.86	1711.56	1939	1784.1	1632.34	1669.06	1623.46	1602.81	2107.91	2270.89	2483.01	2631.34	1444.44	1751.77	1885.74	1618.26	1386.12	1305.87	1765.8	1858.39	1961.87	1536.33	1847.22	1858.39	1445.92	1193.83	1844.98	1103.5	1780.24	1862.49	1501.26	1592.97	1623.46	1572.8	1526.82	1488.58	1532.66	1717.2
CAMP	2843.72	330.578	8583.21	1130.29	657.719	984.727	2652.84	648.967	1335.26	1244.6	834.875	1944.32	6711.61	1413.61	2205.47	2478.39	1738.74	990.362	682.628	1366.71	924.366	803.362	1820.46	961.204	752.974	1205.76	2003.65	15708.8	3246.24	1534.59	1269.74	1019.66	1211.55	7353.1	4472.42	3300.99	928.403	1456.17	3716.6	1784.1	3571.61	2091.1	856.536	1090.84	3335.75	3181.85	954.995	796.595	1302.09
CANT1	380.387	262.933	273.727	313.076	253.623	394.089	334.551	357.403	310.703	356.437	339.552	401.652	241.102	283.918	268.624	740.028	477.224	488.923	691.617	337.048	355.528	338.841	371.719	631.453	295.46	249.858	263.337	348.437	540.716	361.903	202.667	298.599	422.988	554.106	317.407	419.035	228.326	316.211	821.166	377.836	330.077	412.002	324.929	313.983	371.719	259.787	497.545	491.513	480.053
CANX	578.498	382.853	528.49	527.416	618.959	738.504	387.229	460.204	537.559	578.498	655.49	444.622	562.314	401.84	595.637	377.044	353.083	524.096	475.624	499.418	595.36	683.474	549.215	486.604	686.834	320.452	389.204	550.12	477.426	291.084	482.435	574.938	412.569	496.614	587.005	262.226	448.123	605.069	574.67	381.057	527.416	446.712	336.428	632.156	476.984	369.322	585.785	597.34	481.279
CAP1	9978.13	10786.8	11034.9	9622.84	11034.9	9313.02	9622.84	10915.9	10850.2	10552	11215.1	11149.4	9978.13	10077.1	10442.6	16412.9	12365	11034.9	9417.09	10608.5	10173.9	11034.9	12232.8	12515	8661.95	8184.76	9872.88	9828.77	12436.2	10386	9777.65	9371.65	11881.9	9622.84	9569.92	13640.6	8023.43	9313.02	13640.6	9978.13	9569.92	10442.6	10173.9	9622.84	10608.5	10552	12006.8	11149.4	10850.2
CAPG	115.02	100.951	64.95	65.756	47.9861	112.406	174.52	117.529	88.5902	73.9428	89.0195	98.428	95.4227	96.34	93.5335	96.9435	206.669	91.9416	133.373	83.1891	72.5376	63.4108	62.7178	91.1098	80.0651	106.037	129.222	153.631	176.612	144.253	151.546	107.657	96.1563	128.479	68.6101	75.0444	57.5489	52.2439	144.166	158.463	109.209	82.1405	90.3437	85.4788	110.779	122.244	106.44	105.508	93.0968
CAPN1	1568.32	1389.06	633.831	1262.7	1211.55	949.629	1606.56	1628.84	1234.14	1162.82	1282.55	1243.41	1415.16	1426.1	1628.84	1126.6	1760.18	1188.76	1269.74	1311.85	1136.71	1138.5	723.902	1130.29	1063.65	1339.56	1442.97	1450.26	1435.89	1484.22	1313.31	1146.97	1467.93	1310.61	1108.54	988.977	1515.5	1142.38	1391.82	2212.25	1214.86	1215.95	1559.39	1249.18	1709.5	1471.05	1148.95	1111.84	1327.78
CAPN6	160.86	190.147	169.291	232.312	194.989	220.758	285.697	183.649	230.289	196.928	166.957	306.912	192.02	143.889	264.288	186.533	260.534	263.726	187.938	188.241	184.061	157.043	201.852	170.752	187.185	224.071	228.5	145.383	191.773	230.816	138.671	168.543	268.234	222.059	238.457	255.585	460.407	187.872	317.826	222.059	230.106	326.524	161.074	303.367	255.845	187.374	320.592	302.648	219.318
CAPNS1	651.383	923.09	464.931	770.937	694.028	903.17	898.394	902.583	895.372	907.452	650.438	1074.48	679.098	763.822	704.957	699.479	789.217	901.463	1240.87	503.226	1054.7	958.512	393.951	946.917	795.07	665.076	904.529	694.429	949.629	920.53	798.112	646.519	805.324	894.771	717.666	478.401	1040.24	821.762	1579.07	651.383	728.139	1205.76	967.927	1576.07	1157.14	890.579	1244.6	1232.97	655.49
CAPZA1	33.6244	37.0499	62.3161	26.1632	29.01	163.732	31.2056	135.326	61.6903	43.9165	40.6026	2.5782	20.8166	70.5063	31.7952	185.096	86.5222	34.2475	159.168	21.979	47.8729	24.8648	96.4897	135.887	26.8638	28.4516	44.7237	187.788	225.023	30.826	77.2764	23.7404	212.281	49.0179	31.5824	48.5452	10.1884	26.1247	4.57416	74.8049	29.2005	2.2823	28.9221	-0.165287	3.65817	49.3947	3.03402	1.9341	36.2581
CAPZA2	2376.2	2699.22	3343.01	2336.58	2486.87	2037.34	1780.24	1957.11	2261.82	2597.38	2858.38	2077.5	2316.63	1707.76	2780.14	3212.91	2568.16	2307.17	2988.57	2310.51	2077.5	2627.03	3362.25	3050.34	2440.23	1574.53	2200.05	2156.03	2362	1639.74	1796.3	2300.37	2001.01	2037.34	2789.73	2824.42	2274.04	2239.83	1894.74	2150.54	2221.28	2026.36	1822.41	1933.93	2231.01	1928.7	2158.67	1959.52	2689.96
CAPZB	907.452	1357.06	988.345	895.372	808.351	1355.92	1613.14	1012.12	968.667	967.262	937.036	1086.51	940.286	1252.3	1000.61	1432.13	1643.24	1074.48	1390.39	1044.99	971.439	1054.7	1078.51	1300.84	841.535	1523.64	1462.27	1057.15	1088.16	1459.02	1433.28	786.723	867.225	1113.86	919.863	1240.87	685.538	761.127	1481.27	1742.69	894.771	1186.55	1435.89	1171.43	1204.66	1435.89	1228.77	1234.14	769.025
CARD11	234.816	239.096	238.241	272.955	255.783	144.33	145.524	204.558	138.579	139.704	198.419	217.023	242.772	233.751	195.08	111.736	93.1041	134.466	127.405	244.078	198.849	189.394	233.641	173.537	204.487	271.51	223.826	135.949	50.2419	405.034	312.853	301.466	151.029	144.28	278.745	220.654	153.433	243.652	69.4023	158.893	237.09	182.1	278.988	251.579	231.79	212.706	214.66	203.034	109.782
CARD8	652.106	342.7	599.767	327.009	366.677	275.812	500.897	312.736	236.326	216.696	384.943	426.258	396.235	480.053	418.63	605.069	414.428	355.202	418.18	271.916	296.634	391.317	756.925	271.916	402.926	266.937	170.807	405.643	575.582	232.14	294.47	255.397	586.673	501.594	254.767	569.165	458.483	403.477	254.409	411.491	381.51	308.914	365.479	290.744	250.822	454.6	271.916	251.812	567.356
CARD9	493.795	554.645	307.619	467.086	436.429	254.028	978.755	515.348	612.235	493.142	463.432	579.773	466.883	678.302	533.477	277.957	693.668	408.782	315.01	376.198	351.26	353.666	204.161	254.409	735.835	519.853	496.614	566.147	724.828	629.992	323.756	402.02	435.043	266.937	487.768	332.718	213.346	563.726	700.33	408.782	429.44	469.334	710.99	675.645	480.053	641.148	587.341	585.785	347.108
CARHSP1	1782.23	977.368	1478.33	953.695	1009.6	647.346	2784.93	942.838	1078.51	1069.66	684.72	1549.73	1314.78	1447.25	1650.69	1287.18	1444.44	1901.85	999.012	1709.5	1044.31	957.229	2350.63	1124.96	1288.4	2119.76	921.218	856.536	1016.42	2037.34	1106.81	1574.53	1200.56	997.347	1735.25	1669.06	2639.73	1733.14	1883.59	1701.32	1417.97	1627.22	983.843	2088.18	1998.22	1196.64	1856.21	2032.36	1707.76
CARS2	218.796	202.133	157.043	196.211	205.416	112.649	240.565	166.362	141.916	135.28	383.003	180.593	198.615	307.14	200.697	250.178	508.5	105.706	186.659	289.243	99.4874	83.9112	161.028	169.899	218.868	264.103	310.561	239.994	284.939	277.957	205.35	154.49	208.911	87.3897	201.263	284.334	125.617	230.747	206.602	435.656	247.415	241.433	215.627	114.404	205.914	329.256	186.294	162.288	268.529
CASC3	387.229	625.494	329.771	395.097	388.883	338.122	400.96	331.815	380.387	351.405	255.585	381.697	293.554	395.256	358.235	660.67	596.661	442.769	423.781	383.523	357.403	326.89	475.391	399.26	354.438	285.697	442.562	388.33	412.93	534.847	289.59	394.089	499.916	552.977	386.232	617.019	687.678	409.493	584.534	511.944	541.533	337.331	376.708	299.41	327.803	370.732	372.939	372.323	679.098
CASC4	259.649	222.977	461.268	281.815	263.981	469.501	168.112	281.935	274.651	264.98	213.516	142.181	246.411	201.089	311.691	390.345	249.659	304.336	339.104	309.44	265.481	258.777	566.988	360.139	195.764	189.024	220.782	329.09	391.311	138.271	174.34	250.558	338.868	227.553	242.6	308.742	183.114	216.114	171.682	252.464	265.697	172.237	150.046	90.0557	155.817	196.354	147.442	121.802	274.949
CASP1	545.883	547.345	1006.23	569.286	656.932	474.658	657.395	577.887	592.179	549.698	1469.17	491.811	523.108	894.081	702.326	674.705	824.614	589.513	567.171	570.001	506.002	528.801	946.521	543.974	761.722	674.815	726.19	487.99	813.426	534.007	577.382	551.198	540.418	503.345	547.221	767.695	595.999	795.109	567.108	688.082	639.784	531.335	614.903	282.872	481.473	685.742	413.542	422.869	1120.6
CASP2	345.902	281.088	240.244	256.786	308.186	300.012	260.718	264.024	279.817	339.833	235.118	302.648	257.122	228.177	250.258	323.527	260.812	320.452	239.843	290.302	312.225	330.578	337.705	292.768	274.064	241.346	226.891	294.365	216.271	339.405	280.652	293.241	265.15	359.616	237.592	281.188	330.578	271.738	323.657	274.064	331.429	256.786	245.231	311.977	289.467	245.31	313.23	293.346	331.154
CASP3	413.256	377.008	428.905	353.075	554.014	515.902	452.871	534.87	427.248	418.306	367.736	480.025	337.195	481.277	314.55	396.735	320.141	475.964	319.66	353.165	480.144	460.085	345.579	385.95	476	440.575	407.601	343.053	378.678	469.636	551.23	374.714	522.866	380.447	409.25	408.001	379.431	461.24	424.232	337.271	395.885	588.68	419.987	601.497	651.177	519.401	692.633	652.238	362.851
CASP4	1301.87	831.544	1522.38	925.046	1061.81	930.048	1113.69	764.755	814.713	833.543	2627.47	837.526	815.401	1260.8	1159.28	1665.04	1756.99	772.715	1096.36	971.955	826.501	808.225	1910.97	1082.87	1254.13	1182.92	954.467	913.013	1193.57	1199.6	954.643	1014.4	874.009	856.965	875.962	1486.51	749.769	1220.12	1226.51	1539.62	1242.74	1076.28	937.392	634.644	774.326	914.582	811.116	792.671	1928.67
CASP5	172.793	67.1904	215.185	127.905	144.746	112.753	195.696	113.777	176.907	177.711	1048.2	112.617	96.0972	145.293	171.89	221.805	396.235	150.163	173.717	135.147	108.567	113.114	580.084	195.392	280.759	233.863	161.493	93.8942	141.31	148.946	39.8566	93.2131	126.45	168.166	86.7715	167.576	83.6319	203.279	484.351	697.722	209.815	177.644	143.938	66.8881	194.392	105.675	144.746	146.869	430.432
CASP8	86.7039	63.1014	176.897	87.5539	115.169	131.077	76.1855	59.0414	99.2149	110.635	104.07	99.6347	97.6366	93.7502	173.564	41.1705	113.583	100.066	39.4107	141.604	91.0418	101.229	261.609	24.4028	81.6159	111.019	69.242	48.1591	86.2787	86.0707	75.82	76.9117	54.2185	65.1748	68.4418	182.038	82.6246	75.479	60.7217	150.901	117.053	106.04	79.1449	71.7415	63.9089	83.6513	85.7463	94.1909	119.945
CASP8AP2	121.23	170.003	163.074	162.484	161.683	96.5255	118.629	112.895	210.693	212.875	131.046	119.309	184.53	123.865	94.8595	77.4999	83.6533	237.847	84.6213	166.58	223.42	247.145	127.521	93.3565	133.965	126.337	117.317	112.224	102.43	137.749	168.271	129.843	96.8745	101.705	152.763	164.271	117.569	148.143	73.6881	108.487	137.84	109.934	154.091	116.64	98.428	133.878	104.959	109.275	101.158
CASZ1	228.031	193.72	269.643	195.877	264.024	88.2104	246.512	267.125	196.083	194.319	273.424	263.645	189.099	229.513	211.329	159.584	218.315	250.345	142.086	212.875	192.679	203.635	266.29	169.172	260.354	249.599	170.492	240.647	258.526	398.602	201.196	253.437	234.037	229.513	206.312	281.885	256.384	237.772	258.21	279.636	249.599	324.929	249.34	244.826	318.442	200.764	250.53	291.186	301.84
CAT	3816.49	1935.9	3403.34	3024.14	4024.29	2531.92	4243.66	6938.56	5196.71	4924.69	2483.01	2137.27	2255.7	2803.71	3563.34	1192.95	1733.14	4223.35	1088.92	4131.46	4989.72	5720.41	1684.1	1667	2116.68	2421.98	3139.78	3008.66	2326.88	2762	2140.69	2704.03	4767.02	1780.24	2784.93	3410.72	2978.16	3133.91	5599.49	3300.99	2483.01	4331.3	2677.47	4080.38	4376.25	2508.7	4161.43	4321.04	2015.02
CBARA1	183.361	179.169	234.466	176.026	131.519	157.904	152.907	213.941	250.092	233.178	291.759	243.294	150.652	166.31	166.161	287.812	241.95	267.807	312.736	173.388	198.89	183.24	214.32	277.439	186.359	137.516	196.855	179.721	270.312	205.914	179.043	170.369	213.015	226.808	166.255	247.145	138.714	187.744	304.189	168.7	175.972	216.182	159.851	176.67	224.774	181.22	251.083	288.608	198.038
CBFA2T3	193.327	100.015	132.51	136.876	120.486	79.2161	154.922	94.3689	122.066	107.066	121.231	168.871	148.36	127.657	191.988	105.166	146.289	127.765	133.286	180.939	95.8373	86.0853	195.871	100.05	128.91	190.232	125.256	102.807	190.06	123.041	96.554	152.457	119.074	129.098	166.464	148.98	85.786	127.015	175.216	205.473	150.477	114.525	144.082	98.3112	131.192	149.414	163.945	157.939	125.669
CBFB	983.21	1340.79	1386.12	1087.27	1234.14	1052.28	1024.36	1227.8	1180.08	1227.8	1062.84	1068.91	1097.49	1042.81	1040.24	989.708	881.852	1092.62	1099.02	1236.63	1162.82	1244.6	1493.3	1228.77	1009.6	1118.65	1193.83	1294.73	1011.31	1037.5	1297.27	1231.98	1059.74	1166.81	1116.77	1002.02	1018.94	1022.82	834.875	877.827	1068.91	988.977	1278.94	1084.74	944.9	1230.82	962.87	978.755	947.681
CBL	409.493	237.847	405.988	398.23	363.312	249.34	298.96	283.161	399.119	373.442	357.403	359.913	282.807	424.928	373.74	492.908	514.894	562.82	368.588	439.231	311.868	337.593	590.947	373.106	365.479	264.88	265.25	361.203	597.044	370.905	217.267	282.936	426.828	387.414	395.256	614.251	274.186	373.593	581.602	416.501	460.837	295.145	307.73	266.015	333.831	287.451	408.782	363.146	672.722
CBLB	179.967	266.492	119.778	175.602	207.859	148.326	119.188	182.256	280.122	254.124	171.589	181.16	188.365	213.282	119.964	136.559	74.0692	287.353	193.525	205.416	256.114	248.793	113.884	302.885	185.789	213.015	175.296	176.612	73.8568	240.168	277.185	244.439	126.21	173.502	196.536	168.754	197.636	161.586	73.5954	199.452	196.022	142.044	251.26	220.376	183.191	202.608	172.439	187.624	152.087
CBR4	169.554	210.835	282.293	141.344	212.951	187.374	122.015	187.185	218.552	200.101	137.749	127.037	233.445	134.717	141.916	198.038	120.429	175.467	163.239	155.7	250.258	252.202	263.726	195.765	148.237	148.709	175.531	214.177	130.119	96.074	130.957	172.006	141.787	172.51	179.169	200.372	144.596	182.495	97.8887	123.907	124.06	183.938	172.006	152.763	119.114	178.882	121.72	133.237	214.595
CBS	131.214	50.7565	78.4433	44.4986	81.9154	66.1829	19.644	58.1143	53.627	50.3282	13.5855	39.358	61.6818	40.6285	118.383	172.439	379.81	196.725	80.7397	103.663	64.2157	66.0384	151.99	141.703	49.2008	222.331	84.7076	122.283	190.018	29.9494	23.7744	91.8322	108.648	81.706	76.2316	228.5	50.8521	94.9764	108.946	182.256	19.5977	100.72	21.4631	11.7948	72.929	57.4683	86.8839	73.5493	17.5696
CBX1	178.699	177.54	462.973	242.109	174.921	211.946	121.862	185.273	140.902	180.839	222.732	167.4	215.554	247.145	272.827	265.739	284.114	177.36	210.977	302.525	161.831	185.214	494.77	242.603	186.097	187.624	272.441	198.038	307.951	145.939	240.476	212.02	210.264	145.293	179.721	260.354	165.674	267.413	180.085	158.241	274.373	111.725	174.126	88.9409	151.947	194.925	145.608	150.305	276.699
CBX3	102.359	52.0384	101.373	106.066	79.1768	112.87	123.192	102.7	185.034	178.897	126.166	73.2294	101.773	79.5598	144.464	56.2824	109.869	199.487	63.4106	128.925	173.792	166.193	119.966	64.9848	109.197	114.812	76.1132	105.494	128.451	60.6834	86.3735	91.7329	118.231	108.372	86.2483	75.6162	84.7627	83.667	66.4387	96.6794	128.572	84.1312	64.887	76.2219	97.3138	83.1895	100.816	112.423	96.3145
CBX4	424.354	332.718	168.863	366.513	351.405	577.283	165.059	351.695	298.271	366.368	355.026	235.633	319.224	215.034	301.958	522.487	343.519	415.37	483.865	389.875	312.614	287.233	264.772	444.24	332.482	186.839	297.664	362.661	397.206	179.169	194.268	384.795	338.543	517.198	392.591	253.011	345.153	307.619	380.88	306.281	341.534	228.247	252.907	193.461	243.133	276.789	245.145	254.028	505.022
CBX5	119.931	143.982	140.992	185.214	150.49	129.093	202.999	118.939	147.233	160.445	152.81	197.636	170.427	99.1838	188.365	128.608	187.997	173.388	136.559	144.648	110.708	101.353	189.227	119.547	143.839	134.293	120.625	101.775	133.831	183.649	114.338	138.942	215.402	159.539	200.921	204.844	270.411	144.874	201.599	172.328	155.596	201.196	117.569	202.553	212.753	143.517	212.447	194.526	178.76
CBX6	662.764	650.76	1254.47	626.246	688.901	453.316	777.268	655.85	618.279	487.065	537.846	638.707	616.29	889.336	513.542	295.257	562.82	577.018	745.816	735.316	625.494	591.527	1417.97	588.931	611.886	620.021	473.962	589.524	482.166	1183.38	978.755	585.167	558.331	463.874	573.072	706.497	420.353	525.998	591.527	824.077	557.057	879.803	604.417	951.659	844.361	530.975	970.092	992.509	413.648
CBX7	709.587	785.177	343.366	622.325	602.408	775.853	633.147	718.868	701.106	635.48	288.181	712.189	501.806	700.687	538.181	823.52	641.148	926.394	746.245	717.666	773.419	876.528	551.213	769.93	525.998	698.143	610.197	679.703	688.115	747.612	820.648	663.787	731	740.544	567.356	640.501	400.256	558.97	778.91	601.603	503.5	819.173	670.146	819.173	685.177	568.483	861.023	911.642	722.308
CCAR1	250.631	618.279	539.569	326.89	230.366	813.776	459.579	308.436	541.233	564.913	279.901	301.958	387.414	423.168	203.764	249.248	335.78	619.316	472.992	397.37	476.984	477.64	528.78	397.753	305.81	490.829	503.5	458.037	375.492	328.861	537.846	273.967	330.077	188.241	367.93	327.932	217.879	304.312	91.8906	433.906	354.097	368.588	509.554	294.47	219.542	487.322	211.946	271.916	261.129
CCBL1	140.712	103.694	214.819	105.407	112.895	74.0462	114.372	75.8181	74.8714	78.7921	72.5174	77.2342	103.631	120.277	94.1097	105.813	101.972	59.0015	78.3941	113	77.0679	88.3846	246.014	86.5616	100.293	142.282	96.5829	67.7563	74.3367	168.445	129.14	114.748	101.026	72.6027	114.338	135.509	61.9855	119.231	95.4521	123.453	90.4343	113.426	132.844	110.245	133.237	129.519	86.4774	99.0226	100.423
CCDC101	144.845	145.357	198.96	142.322	102.715	81.9652	157.583	116.983	87.3181	87.8554	124.12	159.112	123.935	159.264	126.255	132.884	117.824	82.0783	127.748	101.996	77.2158	68.9674	224.294	114.498	130.826	196.053	100.746	81.3	112.116	229.406	220.393	116.549	117.097	132.673	109.869	145.881	93.3398	118.566	177.749	139.045	94.2961	156.933	120.044	207.583	143.382	105.405	148.668	147.97	103.04
CCDC102A	124.394	131.969	88.3009	100.009	150.253	96.811	108.648	102.55	76.2316	89.4233	92.843	101.126	107.224	123.492	77.9022	66.2006	31.3354	94.6341	85.7871	111.725	110.1	136.444	135.055	142.229	88.7266	191.211	92.3092	58.1308	27.6966	210.335	201.539	143.517	64.3699	83.8501	114.665	136.444	125.287	105.912	47.8409	133.159	50.191	144.166	204.772	145.418	157.581	134.134	149.829	142.462	25.2397
CCDC106	182.442	122.789	268.027	148.287	199.67	94.7974	155.542	98.0228	75.0444	68.0388	108.749	119.013	235.118	114.23	150.837	67.9086	115.395	56.7197	102.753	134.717	91.5856	93.9904	306.385	82.7456	124.06	151.039	162.589	70.8623	64.2564	280.759	200.764	116.53	95.6086	102.781	197.636	138.761	44.2569	170.492	60.173	147.821	99.3999	98.241	142.044	129.356	126.874	143.839	69.7354	90.4672	93.0448
CCDC109B	1713.4	2180.75	1207.99	2021.61	2246.17	2548.59	1278.94	1435.89	1413.61	1274.43	1456.17	1172.69	2170.4	1609.86	1758.13	1041.94	1132.17	1286.11	1625.17	1663.9	1602.81	1493.3	833.781	1478.33	1836.41	1798.22	1774.01	1359.77	1257.92	1322.43	2350.63	1568.32	1382.29	1665.35	1494.62	923.09	1153.05	1482.6	759.434	936.474	1221.4	1319.8	1630.58	1066.34	1419.28	1601.18	982.451	891.825	899.015
CCDC115	341.842	389.875	386.358	401.652	468.023	429.235	385.55	410.756	432.666	391.488	433.724	469.334	442.145	438.432	382.02	320.592	297.332	265.829	402.228	358.548	507.749	486.352	296.856	377.223	389.352	454.39	425.448	256.031	291.531	477.426	445.965	445.018	251.722	458.483	367.249	261.817	431.408	391.11	320.305	266.937	393.793	422.069	466.883	348.601	353.816	375.343	372.665	408.242	243.888
CCDC117	388.883	399.93	562.314	451.435	513.051	825.588	258.124	417.183	393.274	439.622	363.635	364.228	509.554	385.104	398.41	276.242	299.194	361.073	354.582	490.317	426.466	447.365	563.424	434.079	347.752	274.186	348.316	398.23	378.009	323.756	448.123	400.796	420.719	384.635	455.906	339.552	428.187	356.757	356.182	234.037	344.294	257.486	338.964	378.519	320.984	320.592	361.379	333.014	369.322
CCDC12	629.313	471.056	578.805	524.342	530.198	465.787	734.449	678.638	581.924	613.871	650.12	682.162	599.767	802.866	629.992	436.011	597.34	640.171	490.58	600.075	635.809	685.538	452.901	533.477	684.354	847.57	768.107	422.246	598.582	843.789	988.977	564.913	482.869	448.351	702.862	465.572	502.281	764.775	729.71	486.352	641.967	946.917	721.519	892.442	875.966	695.985	883.274	895.372	420.914
CCDC126	70.6616	50.804	186.659	66.9695	64.2157	76.7108	70.2432	65.5639	54.1581	64.3699	96.7164	60.7613	71.2171	73.5493	89.2722	122.558	77.0679	71.5502	71.114	90.9373	50.9759	44.9629	197.829	88.2104	63.5693	52.0513	56.7197	99.6998	108.112	71.1788	51.5771	80.2205	92.8722	78.1405	66.7815	161.074	43.6886	70.6219	58.8247	128.819	71.9479	55.9649	42.4133	50.8672	54.5662	46.1931	50.2817	36.8139	108.422
CCDC127	178.561	150.743	103.887	172.328	169.738	172.51	215.714	193.247	159.851	201.263	144.253	193.585	153.443	183.3	148.052	163.444	162.137	136.224	220.224	161.831	161.493	173.966	92.1573	202.999	189.414	197.443	142.332	138.245	99.9237	200.563	193.396	178.101	164.271	196.211	166.362	139.172	207.731	151.365	199.391	153.687	167.072	269.112	166.528	284.226	269.532	141.594	238.355	221.965	149.088
CCDC128	498.435	420.16	819.173	533.769	444.803	489.868	483.385	561.701	465.145	543.883	528.231	468.457	464.115	602.408	570.869	712.607	625.845	553.803	599.207	527.066	490.087	552.45	1090.02	603.769	513.051	477.426	494.542	594.051	695.605	511.633	614.616	458.906	544.539	400.796	474.203	605.069	444.622	517.964	496.86	567.063	544.539	479.555	447.973	433.724	573.758	443	452.084	493.142	575.582
CCDC130	1667	2447.84	2699.22	1964.73	2293.22	1308.32	2387.46	1820.46	1509.27	1656.52	1341.93	2128.32	1939	2613.98	1674.62	1365.36	1552.5	1251.28	1647.33	1777.77	1742.69	1707.76	2657.59	1707.76	1693.47	2606.12	2069.18	1410.9	1357.06	3287.87	2968.1	1851.79	1689.84	1549.73	1947.19	2058.11	1652.41	1621.62	1722.97	2218.22	1444.44	2153.52	2362	2721.51	2252.66	2180.75	2111.13	2218.22	1171.43
CCDC14	402.228	391.851	399.93	391.488	513.542	354.097	224.633	424.52	375.656	407.905	242.288	257.04	400.592	273.349	295.823	285.042	171.701	296.411	333.43	403.819	347.473	380.387	369.322	419.973	354.258	308.436	284.114	553.546	202.999	283.918	374.367	424.928	317.189	329.527	369.043	260.534	342.966	364.062	135.887	190.147	272.736	205.63	337.048	273.036	197.2	339.25	198.957	199.96	223.497
CCDC19	203.427	183.3	171.486	186.173	262.674	146.568	262.226	146.869	162.396	158.571	144.788	362.661	152.864	133.015	294.47	360.22	343.227	221.51	268.329	192.805	143.57	154.184	348.025	175.232	172.946	192.139	153.244	133.418	210.631	190.089	169.554	176.026	238.541	232.312	210.631	408.603	281.976	149.334	279.537	302.648	215.185	261.313	167.175	319.903	221.269	132.25	283.269	285.697	379.526
CCDC23	2019.64	1888.19	2677.47	2029.31	5302.1	1194.65	2307.17	1800.24	4171.22	4623.67	1628.84	1903.98	3871.13	3003.65	4233.01	3520.84	5118.26	2119.76	3437.45	4780.86	2631.34	2730.64	3824.37	1820.46	5227.23	4376.25	5086.02	2869.39	3410.72	4310.49	3941.41	4385.86	4024.29	1729.2	4408.23	1649.05	10737.3	1808.6	935.887	4331.3	7079.2	1986.53	3233.92	4281.64	2316.63	2853.57	3029.89	3151.61	2175.92
CCDC28A	966.496	672.722	1218.14	907.452	990.362	889.959	645.765	726.537	816.474	833.781	898.394	702.445	794.524	839.772	1034.38	1050.03	1025.88	788.653	1230.82	912.748	1055.52	1059.74	1430.51	1108.54	886.382	712.607	691.617	797.111	827.159	736.729	751.739	967.927	732.817	899.015	879.803	1090.02	783.761	1033.64	671.185	851.332	1122.52	688.503	683.936	541.533	731.959	759.434	789.707	830.068	1225.77
CCDC32	314.608	327.556	372.665	385.418	353.083	563.424	352.292	317.961	309.182	305.545	425.626	277.625	388.525	403.277	356.437	379.81	373.106	264.288	333.548	410.583	337.986	343.227	304.189	388.699	320.452	374.226	376.198	269.328	276.789	484.351	463.649	412.002	310.315	360.064	293.122	356.757	364.836	320.452	235.462	361.755	359.135	334.946	315.918	265.918	333.548	410.583	307.505	300.786	349.028
CCDC44	158.876	156.95	217.957	159.027	158.292	146.131	234.862	162.912	138.326	153.288	207.228	256.483	157.688	223.984	173.502	122.859	181.766	131.006	136.514	170.807	163.444	167.729	224.298	146.528	168.863	251.622	187.997	127.412	115.173	270.213	251.722	173.056	144.833	144.788	130.288	154.027	145.013	202.553	181.511	200.842	139.028	217.332	211.946	268.027	261.817	218.02	247.836	191.395	107.866
CCDC45	224.467	245.659	289.13	261.605	243.462	218.868	142.78	186.903	197.322	181.511	166.207	144.962	247.415	250.092	186.173	203.352	161.535	150.938	211.128	227.163	193.247	172.846	293.007	266.832	236.469	229.513	235.034	229.59	134.458	226.502	369.043	217.403	143.617	156.788	215.936	176.133	168.445	182.014	82.3299	165.789	169.678	154.579	241.008	191.526	132.707	233.028	123.794	129.602	154.027
CCDC49	344.862	169.341	321.518	309.315	344.418	184.463	323.266	230.816	370.247	397.069	393.618	222.267	337.331	276.377	307.389	277.439	258.981	428.825	223.341	316.471	374.055	430.432	336.428	211.047	387.809	234.107	183.649	322.791	398.23	221.887	189.099	323.266	267.926	200.921	357.236	399.93	188.241	397.544	242.201	335.78	345.153	249.248	226.417	211.875	211.74	193.645	299.29	273.136	500.653
CCDC53	481.279	400.796	550.12	366.946	395.926	821.166	318.968	484.109	450.375	431.777	464.115	360.763	487.986	382.52	426.466	537.846	434.707	385.262	669.743	425.847	455.455	517.718	451.862	607.491	429.44	353.943	556.215	503.763	481.96	285.59	462.743	593.053	424.184	563.424	399.431	315.671	436.429	389.352	349.965	371.863	539.569	344.985	372.796	372.939	415.93	388.525	292.124	325.322	429.235
CCDC59	700.687	533.769	725.301	660.67	620.337	847.57	365.479	530.198	652.834	598.582	634.479	382.02	694.028	386.077	639.831	663.787	445.965	548.89	764.314	637.941	695.985	741.584	670.454	762.449	580.378	425.092	574.938	540.716	462.973	304.697	428.601	765.287	549.215	796.105	696.402	415.37	518.24	734.065	218.315	388.14	692.858	336.591	550.902	259.988	281.52	549.836	348.316	295.581	653.681
CCDC6	340.392	557.387	404.558	392.591	389.352	383.003	324.004	439.829	393.437	324.139	387.809	304.936	405.643	303.13	386.232	304.437	375.343	379.213	358.548	378.009	423.974	482.435	393.618	339.982	383.989	265.343	430.856	383.989	400.96	323.385	398.797	366.806	320.065	389.875	331.972	244.992	293.674	316.816	248.355	273.967	284.334	270.017	365.955	385.262	291.531	432.227	293.122	312.953	332.358
CCDC64	278.991	577.283	77.6449	213.163	179.66	299.639	186.359	261.031	344.711	364.528	153.973	155.542	199.255	155.903	134.334	200.921	108.074	312.34	241.757	247.934	212.528	235.553	67.5344	240.078	298.368	240.647	279.082	183.191	66.4841	193.189	288.608	260.08	169.291	223.42	222.398	109.598	211.256	195.696	121.977	144.746	157.851	242.201	288.042	184.463	289.355	263.527	118.895	146.33	96.7854
CCDC65	138.632	124.126	110.353	145.013	165.933	91.7396	68.9351	142.044	125.16	132.004	120.709	144.551	200.697	138.942	116.674	76.7108	18.2131	121.535	159.269	161.885	183.361	176.965	115.762	183.593	119.486	119.342	87.5918	59.7114	41.2136	120.859	177.993	188.635	78.2161	98.5642	142.922	92.4339	104.705	173.269	58.6178	85.6678	122.209	133.499	126.804	152.368	134.506	106.318	93.1866	122.401	28.573
CCDC69	226.033	290.961	125.821	211.946	135.727	241.857	264.581	180.541	196.334	158.349	109.174	208.448	211.478	192.139	222.191	266.492	370.247	161.736	245.069	201.327	236.9	169.112	115.575	216.182	192.205	267.125	300.334	144.696	172.671	237.265	213.874	174.759	172.118	197.263	194.392	163.755	157.395	149.552	218.796	266.591	213.015	147.136	284.114	201.852	180.715	340.818	228.737	267.604	259.787
CCDC72	4975.43	2404.15	2757.66	3600.77	2083.01	3276.59	4989.72	4385.86	4273.9	4188.97	3459.19	4859.26	4024.29	3430.5	4120.54	3755.13	4281.64	4181	4385.86	3800.7	4310.49	4209.93	2921.73	4365	4355.16	4188.97	4062.62	3176.11	3532.82	3485.06	3430.5	5131.64	3824.37	4171.22	4897.01	2993.66	4376.25	4331.3	4110.89	3600.77	5491.15	5029.02	4310.49	4550.96	5118.26	4062.62	5056.65	5029.02	4522.05
CCDC76	167.016	209.186	185.855	220.224	222.331	248.355	101.972	180.969	180.254	187.185	157.497	167.175	225.476	162.754	167.907	166.692	87.3077	151.41	180.357	190.485	195.338	229.763	231.492	188.365	189.639	170.855	188.365	151.741	106.283	96.7492	168.632	218.02	136.559	143.617	188.826	116.917	164.383	198.22	83.7649	100.451	121.823	147.393	215.034	135.509	99.546	184.001	103.289	110.874	97.0442
CCDC84	139.028	256.114	140.671	147.29	163.995	172.671	132.544	130.553	149.633	126.061	129.519	129.727	204.083	221.269	170.252	171.89	186.173	148.852	158.138	167.528	158.979	151.795	131.214	155.347	185.077	219.835	196.334	144.648	97.3384	142.739	191.833	157	110.389	95.7047	125.942	146.82	142.371	138.363	127.488	162.807	121.977	154.387	244.256	261.223	134.679	248.116	166.207	152.715	162.807
CCDC85B	123.383	159.269	130.507	158.041	145.851	116.757	205.63	126.874	137.749	130.914	138.112	193.189	160.29	108.148	190.978	132.416	210.835	149.882	132.97	138.85	134.755	110.422	133.015	104.504	137.097	164.047	128.367	100.616	148.573	175.352	139.67	146.82	196.536	203.955	170.904	147.734	283.384	143.302	224.467	176.907	180.969	263.645	116.72	261.313	213.214	153.199	237.693	199.521	136.444
CCDC88	136.596	155.7	75.966	117.725	130.802	102.006	251.622	174.921	180.715	180.593	159.223	191.724	135.592	236.395	148.48	189.461	237.772	243.888	105.407	175.467	157.239	138.632	65.1875	116.455	154.768	172.065	144.3	208.971	356.303	202.483	173.79	126.296	180.593	147.344	173.601	175.166	108.009	148.052	474.696	206.099	132.25	203.697	164.849	209.742	307.505	136.738	292.327	333.961	130.764
CCDC90A	358.548	618.554	364.836	405.295	280.759	451.862	338.841	227.074	594.716	624.013	407.572	303.13	465.354	226.808	430.039	588.002	292.882	299.29	578.221	246.365	352.466	394.248	271.219	366.107	548.89	237.772	683.936	358.548	256.678	286.515	387.809	368.588	392.591	460.837	634.139	162.396	721.931	292.667	235.553	236.326	482.166	249.151	337.593	257.486	385.418	540.126	154.716	169.172	302.648
CCDC91	108.459	131.519	164.653	97.4355	101.705	244.826	64.2741	168.445	115.646	136.009	99.2399	78.3693	116.601	91.6435	95.771	142.739	68.0787	119.695	167.907	84.6213	137.144	149.04	139.803	210.192	84.6509	83.6005	112.963	197.2	143.166	56.1814	91.6435	112.895	183.649	126.418	106.44	66.2631	172.118	99.2112	40.4747	55.2445	97.9892	84.0981	116.757	54.9509	51.4747	108.612	62.9362	61.0207	60.9661
CCDC92	1002.02	1169.58	1269.74	903.906	1143.22	349.674	1019.66	837.548	804.77	799.611	980.234	764.775	1056.22	868.986	913.372	512.485	564.643	576.161	802.866	759.899	620.337	728.888	1108.54	601.326	862.217	1240.87	847.57	397.753	398.797	1410.9	1571.15	962.129	903.17	577.94	993.676	883.274	824.077	942.133	699.886	1067.24	865.272	1073.71	1002.79	1106.81	1409.48	1014.3	930.449	985.426	556.776
CCDC97	308.553	330.699	222.132	336.428	329.771	384.943	297.228	285.59	342.249	329.652	408.782	363.457	276.022	338.122	278.677	328.724	275.077	349.482	383.694	337.986	334.116	344.294	212.875	382.161	322.137	283.384	298.15	280.122	323.159	335.642	310.207	325.46	281.885	432.882	372.796	268.624	355.801	316.577	367.601	260.534	292.221	332.093	308.781	407.572	320.065	272.827	392.02	369.479	317.189
CCL23	127.104	27.3569	61.8558	57.3912	312.263	36.5429	45.5616	357.567	198.016	202.015	4.30876	26.7265	51.9242	107.678	61.9659	47.5922	-3.54978	25.4705	28.1467	160.551	111.972	126.518	-7.37488	124.766	112.539	31.3546	63.3335	20.8602	14.4567	167.415	112.154	73.8598	219.86	15.5429	44.8352	1.63834	29.7622	31.7887	52.0677	1.38087	13.5359	16.1679	48.9929	164.079	504.484	123.439	80.9822	79.3512	0.038228
CCL4	134.322	160.765	86.3355	117.107	80.041	106.859	111.392	181.311	130.032	120.969	183.376	196.29	99.3191	211.425	86.4966	125.332	55.767	127.511	268.302	100.088	148.875	127.209	124.611	275.128	136.251	167.931	151.164	78.132	51.6799	220.13	156.127	231.325	101.323	111.944	163.846	101.559	169.959	220.649	96.1028	127.026	310.119	214.63	292.122	184.201	180.656	143.872	224.622	225.474	131.49
CCL5	1400.99	5393.56	6711.61	2644.16	1851.79	2365.62	1954.54	2556.72	2794.43	2186.88	2170.4	1688.14	2771.17	3343.01	1717.2	1529.99	959.847	2293.22	3170.44	1951.85	2863.25	2365.62	3621.68	3716.6	1974.15	3003.65	2552.65	1623.46	1148.02	4831.45	6103.57	2492.98	1798.22	1689.84	1991.09	1742.69	3732.41	1047.51	1899.42	2122.73	1604.74	2665.53	3109.82	2798.61	3526.79	2978.16	2293.22	2242.91	1144.04
CCL7	91.6149	122.244	107.657	150.388	139.99	116.53	157.351	95.6735	108.79	120.357	110.543	149.685	105.274	72.649	134.293	126.02	149.415	109.972	103.389	100.263	100.693	96.5255	118.344	98.1754	106.101	127.106	146.766	85.619	111.433	142.508	70.2642	112.259	155.347	124.204	159.027	172.738	244.528	91.6435	150.253	130.587	137.332	163.895	100.105	168.166	178.502	108.866	172.946	191.277	133.545
CCM2	1190.55	852.319	1020.48	1048.82	1176.24	752.407	1169.23	995.696	993.681	947.93	1164.73	1199.17	1035.34	1220.32	1269.06	1075.85	1170.38	1097.65	845.321	1153.57	999.563	873.951	1521.24	937.863	1389.23	1528.73	1048.22	719.999	1124.77	1113.73	1201.75	1141.73	1141.37	863.478	1108.34	1292.86	780.398	1417.36	1011.9	1357.11	1199.79	1106.09	1194.58	1222.22	1308.37	1067.78	1315.69	1302.52	1127.49
CCNB2	35.4222	21.416	37.04	19.0818	24.1607	99.0226	12.968	15.4007	24.7407	32.7309	21.8189	16.509	42.4644	23.4506	22.7961	29.0846	10.2754	14.9982	19.577	19.0334	19.5861	14.1464	21.1186	19.2855	41.0741	19.3313	20.3178	190.842	17.9473	43.1161	175.756	26.1802	15.8457	39.1402	19.411	14.7779	38.8508	31.4405	20.1244	21.8958	37.4537	12.9311	22.2373	10.1396	131.598	96.248	9.40285	12.4065	12.7666
CCNC	85.8885	92.4107	178.509	101.996	163.202	373.753	103.53	100.281	103.611	103.587	103.35	71.7197	160.804	99.6717	144.609	51.6623	98.4773	63.7024	73.9337	139.49	124.318	115.627	163.21	78.1853	97.7185	126.529	103.174	87.5641	83.1312	79.3593	160.135	112.819	85.4497	77.4532	94.3062	83.772	93.6368	115.963	53.7551	84.5231	118.13	109.645	81.8615	102.187	101.615	145.12	61.9157	67.8947	61.8629
CCND2	490.087	727.637	608.799	687.678	756.925	720.247	398.23	856.536	668.354	695.165	712.607	677.917	503.226	616.679	494.981	418.18	166.362	686.834	578.498	909.423	823.52	861.023	457.61	658.827	556.491	430.639	435.656	882.586	426.466	539.299	1152.07	648.593	633.147	463.432	683.474	414.19	953.695	519.048	384.943	201.661	509.554	597.044	577.599	939.543	682.628	428.187	586.673	602.739	219.92
CCND3	9129.05	10122.3	14521.8	8583.21	11089.3	5841.16	9417.09	8950.71	8393.89	7498.55	9978.13	8624.81	10386	10666.7	9464.96	9673.68	8055.38	7321.84	7212.24	7238.77	8547.66	7877.18	12154.9	8473.48	8360.47	10230.8	9038.94	8217.25	8324.22	11149.4	11276.4	9622.84	9313.02	7721.78	10786.8	14705.1	8217.25	8124.29	8698.6	11034.9	9371.65	8661.95	9513.95	9928.79	11276.4	9313.02	11732.3	11604.3	11945.7
CCNDBP1	1883.34	2221.71	2229.57	2395.16	2647.68	1734.96	1563	1761.58	2110.69	2091.73	2066.6	2246.34	2025.59	1598.68	2675.63	2562	2440.43	1959.64	1925.99	2149.19	1838.06	2000.87	2094.6	2372.04	2000.85	1413.08	1733.56	2743.71	1903.58	1906.42	1593.37	2013.46	2565.65	2217.4	2384.91	2863.11	5043.58	2172.8	2191.85	2037.37	2138.49	1838.27	1659.42	1848.92	1737.93	1810.43	2014.75	1877.69	2438.49
CCNG1	745.304	760.366	917.862	718.51	832.629	970.769	345.153	789.707	720.754	828.904	506.486	379.359	736.729	351.866	742.574	674.766	368.391	582.234	853.111	711.464	596.003	693.296	510.332	882.586	593.688	453.316	591.831	785.685	547.641	326.524	591.527	780.898	705.682	612.235	735.316	463.874	776.352	619.316	211.478	393.274	622.659	391.11	459.822	370.576	387.809	494.542	192.519	221.736	550.411
CCNG2	102.458	77.9769	90.8501	81.0263	85.7871	91.3922	85.6678	97.1725	87.1181	99.1557	83.4069	87.4698	92.7259	120.13	144.208	109.732	137.84	79.1169	55.707	115.465	85.7603	79.6721	154.091	51.4596	66.019	103.463	105.21	48.3842	121.152	40.0211	67.5575	73.1574	98.9956	75.3089	83.2395	194.392	58.3496	121.038	75.087	137.704	120.043	64.873	78.7682	58.1856	91.4522	90.7899	101.513	87.8992	161.535
CCNI	12090.6	14521.8	17417.6	16016.7	17272.6	12232.8	14082.8	14886.6	19796	19436.7	13488.4	14267.1	14438.6	9928.79	15297	10786.8	10786.8	23194.2	14267.1	14981.5	15390.6	15186.7	19951.4	15832	17894.1	10666.7	11474.5	18139.1	17894.1	10666.7	11340.4	13488.4	16721.2	12985.2	17417.6	13323.8	25432.6	16517.4	14082.8	14175.2	14705.1	15186.7	11669.6	14354.5	13323.8	10666.7	13640.6	14354.5	21406.9
CCNK	650.12	681.347	826.659	666.227	553.546	742.114	509.554	686.834	567.063	600.075	640.171	488.923	511.944	776.815	552.45	800.264	730.598	696.908	785.685	672.294	659.517	712.607	1012.83	748.103	604.417	580.378	649.705	832.111	865.973	514.111	564.358	680.136	597.044	812.69	691.617	672.294	646.519	656.93	538.697	685.177	595.042	490.58	641.148	379.675	495.447	551.499	561.385	512.73	874.362
CCNT2	178.426	143.028	289.996	212.253	272.062	179.535	111.821	185.851	199.001	208.387	197.6	186.883	202.754	143.382	206.22	155.49	137.844	165.16	135.967	230.539	241.155	237.309	311.954	137.578	161.068	128.647	127.692	156.036	179.073	122.905	144.141	184.956	166.951	144.594	167.216	277.652	195.616	188.749	154.043	133.037	158.801	171.191	121.661	160.302	130.251	118.292	190.035	182.628	227.667
CCNY	485.852	715.198	753.208	564.077	520.227	364.193	866.364	618.313	823.924	817.34	436.518	548.194	713.551	580.973	616.968	312.051	890.861	832.092	470.196	706.684	871.389	904.431	475.081	479.257	501.003	466.796	669.488	488.463	756.084	547.521	517.618	405.062	703.898	485.587	570.357	545.038	360.605	532.608	566.408	858.622	587.665	549.171	906.631	641.807	534.475	785.562	854.832	880.771	457.751
CCPG1	817.973	547.641	972.702	617.588	522.788	472.473	698.551	586.07	579.467	538.697	494.981	709.189	654.38	448.123	749.038	897.081	954.386	629.009	602.408	736.281	535.973	533.477	1352.37	718.51	512.485	629.313	593.053	751.302	726.915	435.656	489.422	620.337	679.098	598.924	733.643	926.394	473.962	622.325	655.49	912.207	773.419	530.475	455.455	396.235	608.482	620.021	643.125	673.497	737.664
CCR1	231.663	61.7394	235.308	168.632	158.19	204.573	160.817	276.022	292.124	305.439	313.359	133.878	110.543	225.554	172.178	207.152	179.66	253.523	261.817	133.373	180.969	171.824	192.867	268.027	265.06	145.796	210.128	199.521	428.187	169.291	160.019	243.294	251.914	219.773	244.992	172.846	338.243	355.202	137.47	114.588	282.936	153.062	76.9138	93.1558	154.53	88.7266	155.945	196.211	457.811
CCR2	256.928	275.546	392.405	226.801	260.654	552.017	219.292	299.242	241.737	257.426	380.676	244.512	319.776	357.194	350.959	228.124	342.947	171.545	330.57	296.114	236.709	251.93	346.262	233.609	278.254	185.223	211.321	232.835	375.794	173.127	271.206	190.819	346.359	245.138	167.025	167.296	225.282	242.443	376.129	189.673	166.591	202.223	197.845	226.975	223.565	295.797	171.271	173.221	411.522
CCR3	353.5	366.782	496.701	340.132	700.296	189.617	291.657	1042.88	410.621	458.91	157.032	423.401	295.452	353.167	401.604	339.618	367.701	220.847	503.365	315.078	220.846	297.959	45.9809	282.006	447.095	543.629	363.604	130.765	439.972	241.406	264.697	231.962	612.279	293.224	236.364	81.6447	200.615	196.588	339.943	60.8949	254.171	352.545	372.585	460.585	264.432	355.576	261.638	253.568	446.12
CCR7	1445.92	1484.22	1211.55	2094.02	1585.87	1571.15	1383.46	1439.86	1957.11	2116.68	422.408	977.368	2212.25	1000.61	1444.44	1026.72	601.028	1000.61	1447.25	1472.37	1798.22	1623.46	491.093	1362.63	1430.51	2639.73	2303.94	1135.75	154.768	1113.86	1959.52	1344.57	1874.32	1594.73	1537.91	1152.07	759.899	904.529	589.524	812.69	625.178	1838.35	1849.69	1472.37	1412.36	982.451	1057.98	1044.99	495.447
CCS	119.764	133.804	91.0682	157.627	125.069	101.949	203.092	142.994	146.608	170.787	103.283	206.581	124.504	156.933	136.841	70.8871	139.289	113.778	76.1559	115.709	134.29	139.613	85.7581	69.2463	108.899	168.167	123.763	168.406	104.696	185.546	137.819	126.62	125.466	121.282	120.623	160.95	204.111	149.8	152.14	239.178	116.174	191.334	141.556	200.414	230.295	128.173	158.892	154.887	109.283
CCT2	698.954	1009.6	673.935	680.602	673.497	1041.94	870.159	723.902	671.185	606.649	702.445	844.886	790.597	871.956	581.602	538.181	509.554	493.59	768.556	623.634	761.614	761.614	563.726	732.817	623.027	1095.8	886.913	659.517	552.45	854.209	1097.49	732.412	565.801	547.641	721.127	540.126	597.956	803.852	527.707	622.659	642.305	967.262	952.229	1100.74	898.394	793.455	701.106	748.103	348.437
CCT3	161.586	218.163	84.8159	137.332	155.389	124.164	230.366	169.619	108.39	75.357	91.805	107.902	137.051	250.722	128.896	94.4085	154.442	80.3389	147.233	143.758	117.358	80.2919	89.8267	160.445	172.281	317.078	222.732	224.221	181.275	179.043	318.681	119.731	159.32	90.2652	158.51	151.546	79.8236	173.717	103.021	187.563	148.803	88.8304	213.433	153.728	140.262	194.133	141.135	115.02	94.3224
CCT6A	175.18	190.389	304.114	192.406	216.801	372.984	191.286	198.627	152.984	145.324	216.725	145.928	222.236	225.6	191.719	134.49	147.498	128.769	241.623	206.019	160.728	191.519	237.746	210.212	172.208	228.808	174.846	211.472	183.965	190.894	245.418	186.227	178.299	160.304	180.837	199.631	140.162	179.338	107.815	160.189	176.648	156.506	189.188	143.592	139.237	198.243	134.536	134.293	117.678
CCT7	266.762	337.183	229.396	295.689	361.825	506.468	281.1	233.754	202.871	212.786	284.389	275.462	299.286	353.959	284.477	167.965	216.67	171.7	204.58	281.865	271.89	257.639	213.628	180.322	264.082	346.17	322.289	187.257	176.819	376.176	441.082	279.63	212.059	263.531	264.407	264.97	205.518	282.984	248.167	252.311	241.38	287.179	282.287	303.293	307.814	314.732	274.155	237.01	176.147
CCT8	1101.53	1790.73	1467.93	1313.31	1669.06	2397.88	950.271	1075.27	1175.73	1354.69	1580.9	1177.87	1638.07	1268.47	1150.07	970.769	830.567	902.583	1520.45	1368.14	1197.68	1313.31	1095.8	1526.82	1317.17	1053.09	1133.06	1046.6	962.129	1062.01	1719.45	1368.14	1060.47	1345.81	1160.06	906.31	1062.84	1277.81	874.362	786.247	1090.02	1106.81	1183.38	971.439	928.403	1141.39	781.26	711.879	697.297
CD14	5529.06	3778.89	3282.71	2316.63	3328.79	3195.35	5929.77	3770.16	3410.72	3403.34	2784.93	3687.4	3499.14	5471.53	4644.89	2794.43	9464.96	3966.94	5056.65	3792.89	3526.79	3580.08	2255.7	3724.97	3246.24	4585.53	3587.28	3786.27	5929.77	4005.62	3287.87	2993.66	4281.64	4989.72	4310.49	2401.02	2543.82	3694.3	7843.77	6857.43	2869.39	7238.77	3383.17	5599.49	4634.93	3890.51	4752.94	4924.69	3343.01
CD160	212.02	342.384	218.704	402.747	482.166	360.22	102.129	260.718	248.275	219.835	171.824	233.524	150.211	303.014	336.736	419.403	69.9104	417.968	403.093	307.73	252.3	242.367	148.756	345.902	276.489	255.314	238.355	282.623	44.1557	419.973	294.564	603.769	223.906	182.793	670.454	297.332	173.717	346.803	79.1392	470.094	425.626	203.427	737.204	219.1	228.897	347.619	247.415	240.823	109.837
CD163	166.193	169.308	231.563	172.299	214.909	206.612	197.089	214.147	158.564	145.485	151.552	174.336	156.202	279.24	202.008	172.423	328.259	148.785	207.539	123.243	195.473	190.576	361.867	153.476	174.661	164.413	178.088	157.629	403.41	145.396	175.378	87.931	265.555	140.975	124.944	221.826	119.273	130.42	462.089	623.399	155.331	201.297	160.119	168.605	132.981	132.183	232.138	191.771	593.402
CD164	59.9027	84.8781	100.08	49.6088	104.074	283.049	62.8335	233.607	85.1839	74.7027	78.8126	9.91081	57.2369	119.818	63.6484	163.239	71.6253	64.7223	241.008	57.0581	83.8249	77.6449	79.0944	187.624	57.9173	69.8668	89.3602	375.492	370.387	55.4403	103.121	83.7346	296.856	79.1864	101.09	87.7591	32.031	69.6103	9.75783	113.617	64.7878	10.263	67.5803	3.65971	8.1547	88.1572	12.1231	4.10142	94.6096
CD19	294.665	257.842	43.1704	256.483	410.241	529.286	138.896	289.821	266.195	273.853	162.868	446.16	463.432	102.235	246.614	385.418	277.726	559.293	297.664	245.58	331.296	358.235	124.512	273.136	185.35	247.316	595.042	104.868	56.4933	487.768	235.308	410.583	174.023	433.515	241.95	178.27	99.2991	151.84	159.906	159.223	98.9336	178.882	245.069	374.848	285.928	817.973	106.545	117.569	171.89
CD1D	558.97	729.282	872.509	560.532	760.366	796.595	639.466	702.862	536.832	641.148	760.717	449.551	627.228	957.229	717.277	564.011	1087.27	464.115	1158.98	749.508	600.075	636.922	944.188	894.771	766.792	433.724	809.956	741.008	1224.71	649.311	481.744	468.877	703.679	591.241	512.485	452.262	561.701	697.297	571.488	594.39	559.899	484.592	583.237	499.916	339.405	718.868	430.856	498.435	654.732
CD2	780.898	2564.49	746.708	1354.69	1654.65	1856.21	1033.64	1853.99	1373.67	1450.26	1181.15	1105.15	1338.1	1509.27	986.927	973.358	440.863	1288.4	2180.75	1220.24	1771.7	1684.1	970.769	2012.06	1057.15	1358.41	1338.1	750.004	368.245	1562.96	2425.22	2026.36	949.629	1489.94	1292.16	933.166	1318.62	1171.43	835.411	803.852	1058.87	1463.64	1587.72	1613.14	1399.5	1352.37	1095.8	1031.29	407.055
CD24	27.185	19.5861	71.242	16.6684	56.7197	46.4853	52.3936	88.2698	27.8517	44.5255	4.26851	33.6569	62.2999	30.8015	54.8674	18.0089	16.5112	16.6296	19.1422	31.0999	21.0574	26.4995	16.5984	24.8246	14.6888	35.8417	54.8995	189.762	21.1075	24.1183	24.467	19.2588	40.3041	88.6724	25.117	25.468	24.9754	19.0013	79.6721	27.5936	54.5662	52.7497	28.124	33.0589	189.02	60.6613	18.7844	31.8605	4.571
CD244	74.9971	100.392	75.8452	105.508	134.134	77.3552	104.959	159.851	124.164	129.399	119.654	160.019	126.02	128.163	76.4739	57.6795	50.2817	135.592	55.1926	107.552	137.097	138.407	49.2287	84.4195	106.068	93.8942	84.3134	101.871	99.3999	143.839	126.996	90.5607	90.5914	56.0774	81.8335	60.5828	110.934	97.3031	75.966	26.6935	85.2782	145.902	148.624	276.124	133.831	102.889	154.53	155.903	44.7233
CD247	4161.43	3824.37	3396.65	4806.41	6483.1	4223.35	3899.76	3966.94	3532.82	3593.45	3899.76	4820.9	4820.9	5804.34	3207.77	3355.28	1304.69	3638.7	3957.19	4397.42	3800.7	4820.9	3270.18	5317.41	4062.62	6151.17	3941.41	3322.24	1267.51	5227.23	7436.48	5491.15	3390.02	2447.84	5753.56	4365	5440.46	5440.46	2122.73	2858.38	5440.46	5425.13	5841.16	6737.8	5166.68	3452.13	6046.33	6189.59	2170.4
CD27	306.385	619.687	152.467	278.677	152.029	1339.56	246.436	188.886	224.707	209.109	104.834	169.554	297.332	247.574	214.595	214.007	207.381	143.217	336.285	275.712	223.579	187.315	115.541	279.636	280.652	383.989	398.41	208.578	55.0363	287.922	606.304	303.014	150.031	288.286	255.015	162.532	190.348	186.294	151.504	177.54	193.849	192.991	299.41	237.354	280.852	395.256	161.98	155.643	102.43
CD2BP2	425.251	441.952	340.132	430.639	394.953	467.309	537.559	366.107	404.154	352.466	520.605	617.955	379.947	478.18	464.342	459.822	644.573	413.824	415.723	387.809	477.64	419.035	328.468	433.906	380.88	481.506	532.331	381.193	476.275	537.846	464.72	383.003	460.608	503.226	363.635	495.211	431.02	428.825	880.833	587.658	417.753	754.437	553.803	545.366	663.437	554.963	811.562	725.301	404.74
CD300A	1471.05	1347.04	1974.15	1810.86	1412.36	1071.97	1883.59	1390.39	1450.26	1436.98	2539.6	1991.09	1186.55	1594.73	2221.28	1442.97	1745.17	1697.26	1754.3	1428.89	1396.88	1393.07	1594.73	1146.97	1643.24	2039.64	1304.69	1598.17	2293.22	1521.95	1322.43	1635.88	1836.41	1459.02	1665.35	1851.79	1230.82	1688.14	2803.71	1419.28	1498.04	1988.64	2009.27	1722.97	1815.74	1482.6	1762.13	1856.21	1546.17
CD300C	317.546	230.289	79.7033	267.712	208.971	120.311	387.988	199.192	194.66	210.554	422.786	377.527	188.697	289.355	408.603	158.622	573.758	65.7956	288.91	171.441	220.073	175.81	115.206	188.697	448.351	235.389	318.681	227.54	203.497	295.46	246.014	183.138	303.014	196.928	309.718	70.1337	203.697	170.537	339.405	138.026	278.065	228.979	433.29	254.671	416.109	363.944	324.929	280.563	233.357
CD300LB	103.52	136.312	120.828	112.014	98.9664	84.7076	154.768	147.821	108.148	113.153	52.1502	125.534	81.2762	127.989	85.619	147.29	189.583	103.694	138.073	107.324	94.8282	116.265	39.0224	96.7164	110.316	104.372	114.919	82.495	171.29	112.683	111.568	96.1282	115.206	120.206	120.93	89.8871	105.056	96.6102	203.764	72.3828	95.2206	132.416	144.348	153.687	128.244	133.924	170.369	150.938	80.3137
CD300LF	230.595	542.943	554.106	312.34	392.591	371.994	534.599	321.106	401.292	422.246	397.37	378.712	320.592	632.484	495.928	487.065	533.477	344.55	613.871	378.519	378.195	334.386	489.868	520.384	408.603	487.556	556.776	320.848	557.682	579.178	312.48	343.678	460.204	416.677	431.777	460.204	375.181	422.988	590.947	552.122	464.537	464.537	416.677	445.789	502.563	417.016	570.31	514.371	370.247
CD302	782.253	632.484	1349.86	686.834	951.035	1022.82	751.302	784.2	796.105	905.761	613.576	900.268	838.049	818.517	1286.11	628.347	815.948	944.188	752.974	1086.51	721.127	909.423	1608.12	604.745	883.926	659.517	721.127	755.927	1116.77	771.377	478.18	713.906	1047.51	815.948	878.461	959.131	613.576	659.943	1131.24	749.508	990.362	856.005	414.029	710.99	574.024	453.699	902.583	919.863	785.685
CD33	577.283	780.898	469.334	610.55	532.629	340.553	502.281	489.638	419.584	425.092	663.097	785.177	643.87	663.097	747.212	414.793	913.928	352.149	480.741	452.084	595.637	539.569	224.467	325.058	624.323	444.622	510.599	514.894	839.772	426.828	271.022	434.877	570.869	565.259	541.233	260.08	498.686	660.67	644.573	338.243	493.59	667.956	678.302	845.402	592.116	728.139	716.854	734.883	503.763
CD36	512.684	614.563	1680.95	701.989	1034.27	964.725	773.782	855.241	661.313	645.843	751.02	593.009	956.94	611.005	1271.72	433.891	589.791	415.477	786.121	543.757	695.36	762.646	652.864	594.597	529.183	496.264	900.645	866.501	1178.26	843.163	559.44	594.668	1071.81	720.301	688.609	545.13	594.114	630.426	511.052	345.212	547.524	685.358	682.157	528.058	660.369	643.062	503.967	548.161	401.772
CD37	1804.54	2239.83	874.854	1654.65	1551.03	2556.72	1410.9	2387.46	2017.34	1949.72	1998.22	1582.66	1701.32	1450.26	1796.3	2843.72	2766.7	2414.83	3762.35	1693.47	3437.45	3008.66	748.103	2425.22	1689.84	1564.71	2726.14	1771.7	2296.57	1422.2	1547.96	1879.68	1844.98	3077.9	1349.86	1071.97	1790.73	1742.69	1933.93	1353.7	1923.56	1682.29	2884.29	1638.07	1856.21	2648.43	1515.5	1403.97	1450.26
CD38	79.4649	72.0347	71.6932	103.605	146.226	3832.18	76.2316	133.457	167.907	193.066	549.836	148.573	263.527	160.86	113.923	126.91	64.5116	95.6735	85.9574	94.4085	82.2752	101.705	47.9139	99.1838	155.294	63.4487	107.835	182.014	109.872	131.56	1099.89	119.154	100.55	72.5376	123.302	104.404	348.601	190.089	67.0321	53.4582	197.2	118.814	163.288	88.1325	337.178	609.881	147.44	175.651	85.5653
CD3E	96.218	118.267	44.6579	104.539	84.0981	212.231	57.3032	156.904	129.727	153.923	56.0264	55.1926	69.0252	58.5817	68.1221	142.508	24.6511	124.06	310.703	78.19	159.083	158.241	46.2685	214.242	73.6417	70.6427	94.5794	72.9689	39.2046	95.771	112.895	134.59	109.732	273.638	99.3999	35.9039	74.8978	85.9318	86.1828	32.9601	85.0764	86.1312	89.9454	124.204	105.12	72.3614	61.7982	83.0586	13.1882
CD3G	264.475	319.079	163.288	416.82	244.439	155.945	359.135	298.49	625.178	566.462	343.076	274.47	471.501	218.315	220.608	63.9375	65.5428	531.835	131.046	443.636	704.512	637.287	140.039	182.916	312.225	458.253	324.423	152.029	116.344	383.989	417.016	300.673	185.665	149.786	237.354	130.587	131.56	287.588	71.5087	283.488	214.894	375.492	324.423	528.49	509.002	328.724	287.233	266.015	69.2636
CD4	101.061	137.649	62.317	146.131	88.3846	238.013	141.502	184.892	227.683	178.331	101.284	147.344	120.206	82.2752	94.3821	178.819	119.695	147.595	329.12	102.296	216.696	210.192	28.6412	195.06	125.655	90.7899	174.023	140.448	200.764	101.417	89.3944	127.905	177.297	196.794	104.404	42.7126	72.7908	128.608	220.146	46.0435	99.2723	160.068	168.814	163.59	132.122	111.906	156.904	151.546	72.9689
CD44	2553.66	2635.03	3053.72	2525.49	2604.24	2387.41	1861.49	2146.37	2052.49	2147.27	2290.83	1543.72	2309.3	1930.32	2158.94	2269.49	2192.62	2130.29	2617.6	2496.95	2071.97	2039.67	2946.27	2370.12	2531.52	1872.54	2162.67	2336.67	1904.97	1830.51	2495.68	2277.69	2068.02	2381.02	2132.34	1717.9	1609.63	1936.44	1583.21	1999.32	1916.5	1669.52	2014.62	1541.44	1788.37	1967.89	1488.84	1570.95	1938.02
CD46	3188.66	2584.98	5086.02	3287.87	4472.42	2535.75	2639.73	2983.86	4355.16	4024.29	4767.02	3170.44	3314.37	3013.66	4005.62	3666.03	2921.73	3808.5	2771.17	4321.04	3459.19	3233.92	4780.86	2543.82	4080.38	2618.34	2451.39	2474.64	3864.03	2644.16	2012.06	3747.39	2734.75	2843.72	3504.16	5856.24	2843.72	3966.94	3181.85	2543.82	3845.93	3724.97	2618.34	2428.99	2682.59	2470.68	3547.5	3499.14	5029.02
CD47	798.619	787.708	844.886	1252.3	1347.04	724.828	605.372	1200.56	1096.65	944.9	930.449	754.437	1164.79	499.916	817.432	650.76	445.789	873.623	656.559	1215.95	1090.02	1090.02	907.452	801.376	881.852	734.065	719.247	1099.89	646.908	507.749	674.375	1187.67	850.357	794.086	911.642	679.098	1092.62	810.519	305.933	491.093	951.659	615.627	718.868	710.48	542.943	688.115	663.437	615.938	797.111
CD48	3871.13	4161.43	4691.46	4090.53	4376.25	4728.31	3212.91	3739.68	4344.26	4110.89	4071.22	3932.81	4033.76	3890.51	3638.7	2704.03	3188.66	2753.32	4243.66	3687.4	4613.25	4462.03	3786.27	4577.18	4100.58	3430.5	3709.1	2978.16	2937.38	3917.18	4408.23	4355.16	3499.14	4767.02	4171.22	3003.65	3056.24	3949.22	3133.91	2326.88	4120.54	3355.28	3607.69	4110.89	3555.27	3073.22	2712.73	2766.7	2344.05
CD5	144.208	198.824	89.1068	140.124	102.889	264.965	135.964	191.092	165.505	176.612	83.9644	101.575	120.998	113.749	88.8077	149.184	63.4683	118.895	230.444	156.584	201.471	201.12	62.0849	194.319	127.374	152.368	163.694	134.293	42.1021	162.137	202.999	161.34	127.949	243.035	121.416	89.5408	113.394	122.594	95.1599	46.1264	86.5857	167.849	176.488	211.256	113.884	117.358	110.874	106.511	36.7861
CD53	1751.77	1844.98	1197.68	1881.38	2158.67	1244.6	1931.32	1806.78	2042.46	1959.52	2428.99	2085.47	1713.4	2411.47	2236.86	1908.11	2224.07	1813.36	1616.7	2032.36	1777.77	1577.53	1758.13	1701.32	1971.52	1901.85	1562.96	1272.32	1959.52	1995.83	1775.98	2080.01	1641.76	1822.41	1790.73	2762	1606.56	2249.25	2047.52	2050.11	2390.52	1813.36	1802.48	1908.11	1840.57	1579.07	2035	1915.12	2972.96
CD55	2552.65	1974.15	2019.64	2593.06	2921.73	1912.55	1221.4	2682.59	2397.88	2463.14	2677.47	1345.81	2249.25	1627.22	3390.02	5546.4	3732.41	2576.22	2740.2	2921.73	1229.68	1303.33	3770.16	3151.61	2376.2	1691.74	1518.76	2884.29	2202.81	1101.53	910.552	2512.8	2900.22	3102.53	3139.78	3335.75	1498.04	2576.22	1592.97	3580.08	3681.08	1413.61	1303.33	917.207	1165.84	1344.57	1207.99	1305.87	6603.65
CD58	535.697	321.518	807.392	505.256	586.07	650.438	422.246	479.328	448.974	539.569	685.177	414.029	621.985	504.587	779.874	763.354	743.032	419.797	620.728	580.378	422.246	437.224	923.729	673.168	419.237	468.023	449.764	538.465	625.845	372.796	375.017	539.835	534.599	707.351	535.143	857.079	403.819	492.434	476.984	627.228	588.639	466.421	349.345	224.633	403.093	538.465	381.51	413.453	693.296
CD59	103.546	34.852	56.5735	44.867	41.2444	38.382	53.4952	63.6892	47.5263	49.2447	141.047	54.6331	51.9518	50.531	67.7145	105.606	125.117	52.4633	61.7982	60.7223	34.5754	43.1704	87.8172	61.0207	90.8501	47.8107	23.2863	89.9745	50.4455	61.1219	46.4704	59.6775	52.1328	71.1788	65.7956	119.778	27.2984	93.4741	122.985	179.851	78.7682	80.6889	37.3731	38.669	67.5575	45.3015	74.5758	62.5719	231.492
CD6	1004.48	1751.77	346.533	1436.98	1225.77	1387.66	984.727	1175.73	1322.43	1268.47	721.931	1007.92	1518.76	694.429	930.449	740.544	532.331	1118.65	1097.49	1541.66	1688.14	1602.81	254.922	1023.67	994.41	1512.17	1609.86	672.722	267.038	1148.02	1383.46	1387.66	812.211	1102.44	1152.07	604.417	1309.53	952.229	621.031	508.5	742.574	1513.87	1842.77	1847.22	1862.49	1339.56	1067.24	1098.24	384.475
CD63	365.955	386.57	325.058	334.946	233.692	292.667	565.801	504.587	277.303	281.608	384.635	372.939	326.644	519.55	472.201	408.782	540.968	318.826	332.358	362.661	330.578	318.442	315.918	332.482	321.908	428.187	409.493	493.59	404.353	384.795	445.018	385.903	494.981	407.055	307.025	411.491	206.602	363.146	642.305	605.985	426.258	416.308	391.317	357.072	401.84	418.847	425.448	421.462	497.078
CD68	1240.87	2242.91	2258.91	1146.06	873.045	2686.36	2421.98	1742.69	1153.05	1056.22	1633.92	1106.81	1135.75	2463.14	1416.59	1921.38	3029.89	908.778	2839.32	802.351	1272.32	1032.88	1278.94	1872.08	1520.45	2063.84	3335.75	2137.27	2644.16	1780.24	2104.67	925.749	1954.54	1870	1143.22	1013.55	968.667	1209.22	1171.43	1609.86	1223.75	1044.99	2333.62	1046.6	988.345	2411.47	1083.72	1193.83	1205.76
CD69	54.9684	96.8745	101.126	73.4381	88.8304	149.334	47.608	105.508	63.0484	66.2436	106.943	41.3548	53.4096	71.423	49.0808	83.9644	16.7855	39.9461	168.7	44.7996	38.599	54.3396	102.4	135.964	54.4961	58.6178	75.269	45.169	26.7419	36.2632	100.616	84.6798	78.836	43.1548	58.9844	55.0363	63.4295	68.1863	10.8897	46.8596	76.7108	28.2425	56.6831	37.4305	21.2631	37.2513	15.1757	11.0143	50.0279
CD7	474.696	1099.02	488.467	682.162	592.48	537.088	916.588	463.874	515.674	378.009	422.988	608.799	568.206	973.358	519.853	528.231	458.037	400.96	788.653	563.726	699.479	507.466	530.975	603.432	479.813	1313.31	1084.74	544.228	132.328	1105.97	1311.85	625.845	699.479	552.705	821.166	1046.6	376.007	575.582	450.589	614.251	690.194	806.881	1347.04	953.695	826.151	912.748	913.928	927.867	337.451
CD72	114.886	97.8887	44.0598	109.701	165.103	91.8628	99.7953	119.407	86.2105	98.3999	106.006	220.539	154.091	70.0188	129.44	115.055	180.477	233.781	93.8091	139.269	133.28	138.85	66.7133	99.9791	101.513	110.389	191.724	45.6409	34.1941	308.781	121.535	164.904	83.6793	157.635	111.794	134.55	37.0626	78.9156	106.175	104.959	62.3553	140.31	149.552	172.118	187.624	336.897	126.562	120.464	78.2161
CD74	1728.12	2922.46	1164.54	2241.27	1986.65	3502.75	2113.98	2908.2	2402.39	2475.96	3898.88	2852.1	2254.87	2298.49	1699.79	2546.5	1795.32	2856.31	4190.55	1878.74	3378.37	3001.05	646.683	4024.21	2377.35	1450.17	3398.31	2154.22	2943.31	2512.51	2146.08	2394.43	1646.16	2719.39	1944.52	947.776	1597.12	2222.3	2349.28	857.159	1831.56	2328.17	3390.54	3288.81	2414.69	3456.95	2590.69	2501.07	2103.28
CD79A	294.948	414.651	73.5608	250.493	385.057	1066.25	141.994	465.452	219.849	194.705	157.724	319.99	459.064	181.941	245.756	352.878	326.479	396.599	412.114	327.132	352.143	344.264	224.355	383.735	223.458	336.112	698.374	119.732	59.5419	692.616	465.024	428.222	200.507	554.107	220.739	289.981	81.7002	177.299	99.1336	228.941	114.801	140.825	373.521	308.255	215.674	936.081	94.153	103.226	161.657
CD79B	170.727	167.841	58.8532	156.123	226.94	324.609	132.12	220.34	145.539	138.998	130.426	313.905	249.328	111.461	159.264	159.845	191.564	215.699	147.325	204.043	254.012	222.698	91.8823	185.422	186.138	217.311	354.712	68.2444	97.3089	291.235	183.238	219.942	127.028	257.385	126.731	148.46	136.327	143.732	169.883	126.131	119.781	212.162	204.087	265.567	245.033	377.367	135.033	133.856	111.679
CD81	5288.69	4924.69	4243.66	5440.46	6783.14	4806.41	3724.97	6508.05	5256.07	5227.23	4376.25	5288.69	5888.89	5086.02	4209.93	2564.49	2316.63	4385.86	3540.37	5580.41	5580.41	5471.53	3687.4	4924.69	5753.56	4496.64	4080.38	3018.5	2762	6665.06	7750.32	6459.9	4385.86	3917.18	6210.52	3240.58	5131.64	5453.95	3839.09	3096.28	4897.01	5599.49	5196.71	7381.82	7187.35	4419.06	5491.15	5317.41	2376.2
CD82	244.84	156.988	131.139	140.495	128.153	186.63	181.029	142.423	178.559	170.522	146.039	184.558	155.124	130.527	147.857	217.782	209.058	289.901	259.805	192.453	228.015	206.102	201.035	231.988	210.815	218.863	131.238	139.197	200.564	207.972	163.08	174.616	155.696	196.614	206.145	170.837	150.52	167.999	339.399	197.563	201.974	197.198	124.01	187.222	275.571	122.705	278.045	207.004	247.302
CD84	138.541	365.146	256.295	190.42	184.277	203.059	203.124	245.659	282.623	262.019	154.34	125.36	230.027	243.133	111.828	73.2484	113.467	372.486	112.153	197.06	337.705	345.902	131.933	89.9164	157.581	164.745	147.54	164.849	177.766	249.065	330.322	160.973	175.701	194.062	242.288	129.093	154.34	153.631	141.748	107.117	117.168	218.616	250.631	252.097	222.899	204.224	166.58	162.137	90.2313
CD86	173.152	233.943	190.056	228.77	220.867	209.096	341.328	184.05	231.27	220.207	344.191	286.981	256.588	285.666	268.213	189.31	405.796	160.031	230.336	191.939	192.029	180.452	148.989	184.342	307.068	193.382	338.175	156.843	285.689	248.26	178.859	172.404	196.253	185.559	202.075	154.214	178.265	254.262	258.968	156.673	267.708	320.841	252.364	300.743	197.109	276.939	277.055	276.88	230.645
CD8A	663.152	1538.5	230.04	903.089	745.365	480.696	500.876	1007.73	723.872	629.123	1057.54	956.922	913.455	472.996	667.08	311.414	121.392	1240.66	332.009	720.795	639.536	572.529	511.29	993.843	551.197	499.552	510.411	197.193	283.918	1249	1316.83	1076.04	583.087	1284.11	856.124	492.439	1002.01	374.692	512.514	458.84	282.843	883.14	557.44	1149.15	1003.31	893.456	870.678	872.931	223.678
CD8B1	48.3435	184.201	21.5717	74.8714	36.35	50.7203	61.6818	68.8686	88.889	59.8694	86.8221	82.3299	71.8798	56.4592	55.2445	-2.11376	5.12098	53.5924	12.3224	44.7599	26.9394	21.1075	43.3216	48.1773	22.9882	89.3944	60.7223	10.9521	6.94446	261.396	234.25	68.1475	36.0639	106.511	47.9285	56.8473	60.5241	13.329	44.4749	85.2321	13.2328	110.874	55.0537	147.29	101.513	96.5255	81.1706	88.3009	1.68388
CD9	1435.89	1804.54	2134.16	1093.46	2543.82	1143.22	1186.55	2744.42	1582.66	1621.62	645.765	834.318	1452.8	1359.77	1623.46	1012.83	588.639	1219.32	1499.61	862.217	1406.66	1601.18	947.681	1292.16	1012.83	978.755	1369.51	2815.62	1059.74	2058.11	1602.81	1350.99	1561.1	1756.34	1833.94	653.681	1133.96	1372.25	1375.24	652.106	1302.09	1064.59	999.737	1155.07	2926.47	2340.18	1124.96	1110.98	1190.01
CD93	2853.57	1701.32	3369.15	2588.38	2910.97	2147.84	1815.74	3139.78	2784.93	2775.29	1171.43	2789.73	3139.78	2775.29	2340.18	2972.96	4233.01	3629.59	3747.39	2436.86	2916.79	3563.34	2564.49	3499.14	2548.59	2001.01	3282.71	2682.59	4188.97	1961.87	1493.3	2766.7	3443.74	3164.16	3709.1	2689.96	2111.13	2839.32	2478.39	2024.13	1703.6	2387.46	3201.38	2889.43	2178.39	3258.25	2815.62	3109.82	3571.61
CD96	659.943	706.497	302.053	635.809	704.512	541.79	427.864	654.38	728.139	723.174	433.906	549.836	661.863	430.639	523.251	388.883	210.47	407.225	854.209	623.354	727.285	771.882	252.59	723.174	762.059	724.828	509.255	398.602	127.037	553.803	816.474	1006.36	436.204	452.084	800.856	375.017	693.668	795.07	280.237	393.793	685.954	669.432	651.052	972.702	767.696	528.78	632.484	626.246	244.163
CD97	5816.2	5586.14	2293.9	5163.53	8247.4	4302.52	3995.4	5134.33	4885.13	4950.77	8187.65	4901.4	4675.07	3961.39	6576.34	10594.9	6756.73	6362.02	5491.68	5485.95	4731.51	4959.94	2741.23	4992.01	5990.14	4394.74	4856.33	4173.41	6401.77	3486.69	2451.27	5126.48	5537.29	5158.39	6158.96	6523.94	5000.38	4691.92	6316.71	5272.18	5559.07	5237.03	5441.49	4319.06	5254.07	5217.35	5031.13	5126.51	9828.72
CD99	1099.89	1836.41	728.519	723.902	681.765	1888.19	1001.33	1287.18	821.762	704.143	669.743	911.072	1009.6	1003.74	1058.87	749.038	887.483	652.106	2001.01	597.956	1369.51	1108.54	464.931	1647.33	858.265	1179.06	1225.77	1141.39	894.169	1058.87	1711.56	1039.44	1284.84	956.465	897.706	455.264	1060.47	835.411	1266.33	835.411	1012.83	823.52	1754.3	1015.6	1161.09	1478.33	914.582	937.036	856.005
CD99L2	171.126	152.133	106.206	178.055	154.53	192.679	208.911	169.851	126.959	157.851	147.865	241.675	172.793	178.442	161.39	153.486	238.786	116.051	168.487	175.651	187.185	194.925	140.583	166.911	192.02	187.185	243.888	177.876	147.344	218.02	223.341	176.965	114.954	168.7	161.074	183.138	169.06	152.572	355.801	199.324	167.016	233.109	166.049	257.297	231.313	186.719	231.492	228.737	215.714
CDA	775.853	542.632	343.227	428.825	352.03	505.256	1499.61	547.641	497.796	460.204	449.764	1136.71	849.202	675.645	1534.59	2313.73	2716.96	706.072	1112.79	756.925	403.093	438.016	587.658	1201.83	493.795	727.637	938.309	1251.28	1185.38	726.915	401.652	602.739	848.727	993.676	722.752	1135.75	980.946	710.99	1507.5	1055.52	844.361	1304.69	862.792	593.372	1104.38	1188.76	1476.98	1408.02	1383.46
CDC123	1022.1	614.616	878.461	635.48	495.928	633.831	798.619	608.482	685.538	746.708	624.686	722.752	573.418	777.268	768.556	1022.1	809.47	868.347	825.588	707.865	773.885	800.856	1153.05	677.917	589.524	789.217	618.959	621.031	783.761	519.853	706.939	642.305	617.588	907.452	596.003	984.727	491.714	678.638	851.332	1140.44	910.552	911.642	639.831	513.823	1150.07	515.674	815.948	785.685	657.719
CDC16	298.96	547.939	703.271	361.755	482.869	443.828	543.562	379.038	371.994	267.21	326.118	422.069	326.118	432.882	276.489	349.482	247.75	318.057	393.118	272.238	204.705	180.786	515.674	508.723	331.815	471.056	339.405	435.436	318.328	415.37	531.528	298.042	433.515	180.357	245.737	392.92	596.359	329.527	188.951	547.352	269.328	278.382	418.42	225.476	266.677	371.719	329.92	333.27	281.801
CDC20	79.5649	55.0363	46.2809	82.8774	68.804	183.361	125.203	53.6777	53.4248	49.9977	79.5922	104.504	110.934	82.8774	68.5631	57.5294	61.3061	50.7203	40.5434	70.9222	40.9923	40.0326	35.3067	36.0099	104.669	111.568	84.5986	343.678	34.0389	204.705	676.379	67.5344	46.1398	74.434	73.4613	113.394	120.206	74.4561	84.1244	112.617	96.6517	71.5502	91.973	77.4262	341.842	274.565	79.7999	70.3768	65.7956
CDC23	222.661	348.728	351.12	306.051	350.66	274.875	222.732	254.671	291.398	270.312	208.143	229.144	314.213	239.669	206.883	250.914	192.931	224.071	294.564	277.957	309.458	300.334	325.322	307.951	278.677	251.528	301.84	295.823	153.101	239.669	267.807	299.41	210.758	260.261	300.448	247.491	245.069	270.512	119.818	178.213	200.153	223.822	268.529	217.957	187.035	269.328	168.7	216.404	172.614
CDC25B	443.221	719.845	269.496	597.489	443.64	791.87	355.09	621.884	511.678	532.27	390.641	489.219	432.981	471.781	258.076	374.2	141.203	529.995	629.26	511.755	566.335	649.669	280.499	751.383	481.274	474.09	400.23	489.619	185.099	594.796	994.119	605.999	450.03	559.326	425.958	321.391	550.119	385.983	455.761	200.208	288.016	527.995	639.011	732.597	601.615	465.034	394.77	426.445	165.428
CDC26	443.828	379.675	585.167	530.723	503.226	494.542	610.197	413.296	506.486	468.252	453.967	567.679	505.492	580.378	670.881	489.194	612.235	436.429	503.012	453.699	389.352	390.387	603.769	405.808	522.788	521.615	446.16	310.081	405.988	542.943	484.84	516.415	578.221	427.658	509.002	666.577	671.185	509.791	617.019	581	524.91	663.437	425.448	605.985	668.662	383.523	588.639	539.299	571.488
CDC2L1	99.2991	105.577	95.3376	106.978	122.132	115.431	126.838	87.0896	89.6823	91.8628	110.841	129.309	93.9289	207.516	114.261	83.1627	165.505	110.779	43.7863	108.567	139.172	105.12	102.916	46.8171	103.572	167.907	157.093	73.6881	109.462	129.14	122.896	65.756	91.6764	108.009	83.9112	226.183	154.135	45.2276	310.081	163.338	100.392	211.329	142.83	142.086	172.281	125.117	140.216	134.971	96.1282
CDC2L2	166.639	93.2131	136.397	76.7108	92.7259	58.1308	228.407	94.4085	274.064	263.048	180.021	132.544	134.845	297.455	93.692	50.3282	123.612	354.739	77.2844	150.031	433.073	337.178	125.78	70.9382	177.016	214.595	181.694	111.285	133.106	172.328	166.853	78.6941	72.9495	55.0713	122.089	180.541	117.275	104.109	20.6742	293.554	275.712	186.533	159.63	170.2	215.402	144.401	210.835	209.815	150.49
CDC2L5	297.228	277.303	276.242	372.665	342.523	215.111	253.087	287.451	342.832	366.513	281.088	324.423	295.581	296.856	270.914	306.658	254.584	351.695	201.852	343.227	296.059	275.077	362.358	233.781	291.759	323.657	281.412	313.85	328.189	331.154	278.876	327.411	250.995	311.449	345.329	321.62	297.228	323.527	260.354	332.358	340.553	269.532	273.349	274.47	276.242	261.031	274.565	301.062	322.657
CDC2L6	1168.77	801.852	1263.73	928.403	792.128	658.113	1044.99	863.423	840.41	816.474	802.866	1227.8	924.366	1175.73	1007.92	1813.36	1115.7	1256.78	978.755	1358.41	983.843	1166.81	1549.73	960.567	964.302	1060.47	727.285	931.764	1539.9	814.909	857.626	1018.13	1245.73	884.585	1245.73	1554.08	668.662	1231.98	1142.38	1158.98	1176.8	1226.84	839.772	946.917	1420.77	789.707	1802.48	1786.31	1569.75
CDC34	614.956	1745.17	871.346	1427.71	1879.68	816.925	2414.83	1085.63	2147.84	1995.83	966.496	1885.74	1041.94	743.032	1143.22	650.12	953.695	1765.8	811.562	1350.99	1203.61	1240.87	1183.38	1071.1	1724.73	1513.87	1118.65	1232.97	839.266	1993.34	393.618	1300.84	1496.14	2104.67	1493.3	1347.04	5491.15	1598.17	1192.95	1810.86	1373.67	1235.31	1224.71	1928.7	818.517	836.486	1509.27	1574.53	2024.13
CDC37	3287.87	2794.43	4496.64	3270.18	3423.31	2905.9	4439.49	3090.07	2815.62	2894.19	2916.79	4540.96	3547.5	4281.64	3308.07	2261.82	3201.38	2627.03	2744.42	2916.79	3240.58	3227.22	3181.85	3139.78	3176.11	5529.06	3607.69	2543.82	2631.34	5210.44	5471.53	2677.47	3116.46	2310.51	2931.84	3681.08	2478.39	3499.14	4522.05	3687.4	2824.42	5856.24	4344.26	5491.15	5393.56	3540.37	4924.69	4939.17	2196.73
CDC37L1	174.921	242.109	295.46	186.294	201.661	315.01	150.439	246.512	204.635	180.357	163.074	116.199	202.862	185.214	181.398	260.905	172.671	206.748	296.268	221.661	173.85	215.111	329.771	274.789	161.181	183.534	198.957	228.897	249.151	122.244	217.403	207.674	230.674	197.322	212.447	197.571	125.821	190.217	70.1106	199.67	156.48	125.117	199.324	114.152	114.028	195.19	97.8567	111.609	183.938
CDC40	610.55	536.562	555.608	628.347	698.551	529.615	446.941	539.569	539.569	567.679	613.283	516.415	597.34	507.466	617.322	633.147	616.679	476.526	560.811	623.027	500.653	604.417	651.052	640.501	618.279	554.106	617.019	610.55	587.341	362.82	457.437	579.178	554.377	570.869	603.769	489.868	546.518	549.519	454.6	635.809	506.978	445.427	537.559	363.77	402.228	495.928	438.826	443.211	674.375
CDC42	246.055	191.81	127.222	190.856	208.488	184.537	177.251	157.68	196.661	155.364	250.18	139.151	177.273	177.84	212.434	246.696	208.039	157.792	170.271	203.184	156.824	149.364	212.357	274.959	234.868	204.883	187.431	186.086	186.83	177.755	172.447	234.657	176.527	198.416	183.477	240.237	169.433	268.429	138.218	219.773	297.362	125.245	118.155	93.6591	140.053	178.921	104.051	108.481	289.636
CDC42EP2	390.945	187.315	234.774	301.84	184.892	108.79	362.505	159.63	185.35	178.158	455.455	147.821	160.391	287.451	383.523	254.028	471.056	220.539	253.523	255.015	177.82	164.961	162.807	205.493	259.787	307.73	333.151	205.971	327.273	224.071	95.5813	303.98	241.518	313.85	384.635	467.534	111.397	353.943	316.577	397.206	297.926	297.926	271.43	205.123	309.315	146.666	349.028	392.758	455.648
CDC42EP3	124.463	109.425	236.326	130.243	179.354	179.548	155.844	85.6678	95.6086	107.148	71.0037	186.976	166.791	125.821	211.666	53.1234	188.951	137.182	33.913	210.693	139.401	164.106	545.084	41.4715	98.3676	176.907	119.076	64.895	134.633	100.198	148.192	95.4227	117.648	123.907	71.8142	345.637	162.188	88.3575	176.196	332.093	68.5183	133.545	105.771	60.9661	188.826	203.427	130.957	114.477	145.693
CDC42EP4	334.116	254.487	88.0818	277.957	282.623	132.888	253.623	233.781	256.786	276.586	265.343	360.331	247.671	175.467	257.122	336.897	462.973	356.303	272.548	267.807	292.768	325.46	111.251	234.173	456.608	205.054	410.241	235.553	421.871	182.256	109.241	236.801	284.939	259.787	311.977	246.947	267.712	285.273	478.61	303.98	273.853	306.912	373.909	271.538	273.24	335.642	370.247	409.493	572.689
CDC42SE1	327.556	596.359	665.451	447.574	555.342	449.953	494.77	555.938	385.903	387.809	515.124	572.062	417.016	472.201	514.371	1095.03	426.258	471.949	536.267	428.825	325.863	315.267	724.828	567.356	437.224	470.583	396.077	516.415	663.097	690.546	475.151	402.228	612.629	385.104	496.382	831.102	351.558	411.825	679.703	384.141	384.795	459.822	460.407	763.822	621.031	420.539	690.546	613.576	594.051
CDC42SE2	170.2	193.585	371.068	184.4	313.602	433.29	206.602	139.99	231.148	178.99	401.117	189.414	337.851	240.322	227.163	128.936	180.357	128.367	151.9	255.935	185.536	211.256	431.991	167.016	181.398	282.807	207.453	93.9576	132.627	250.345	281.412	224.221	184.33	188.951	201.792	307.73	164.156	196.466	156.293	232.14	205.836	164.534	160.391	117.236	200.764	217.05	170.427	169.06	157.738
CDC5L	74.0217	122.945	156.207	114.338	100.392	218.935	73.4381	148.382	79.6721	94.262	79.2907	24.7294	95.8359	136.514	91.0224	196.725	105.274	89.6823	181.031	90.5024	80.6889	79.9452	167.729	171.29	70.5966	83.6319	99.8565	207.859	199.67	49.5445	113.578	80.2509	170.589	103.754	123.612	84.0502	54.8103	94.1434	25.2465	109.129	92.2487	27.2489	81.885	5.39206	15.1733	105.706	14.0375	31.7986	121.416
CDCA7	66.56	26.4761	27.9217	39.1283	53.17	50.1699	39.3124	37.4712	53.3217	56.2064	61.1164	32.8682	95.0354	45.5337	21.9231	30.1153	7.69939	39.367	31.4152	45.9117	29.6286	36.8524	29.0863	24.4996	91.8099	28.8092	21.8458	162.034	20.5136	52.9969	139.271	79.6031	25.3766	37.7368	34.3935	28.6768	77.9821	46.1019	25.1567	28.1341	45.2706	70.2026	30.7146	74.1495	193.071	45.986	24.73	42.5203	34.2776
CDCA7L	297.09	144.45	316.211	224.774	418.847	247.491	181.573	353.816	239.415	283.384	137.704	384.475	335.78	221.887	183.649	191.654	112.406	248.355	133.196	279.198	297.455	298.818	197.902	162.027	235.462	228.897	298.818	475.804	88.534	605.985	328.598	304.697	154.236	335.093	158.823	258.526	94.6634	151.456	291.869	328.468	190.42	261.129	184.589	430.639	512.485	269.112	244.352	270.512	208.655
CDH2	42.5464	30.0312	1.77937	35.0856	32.6876	18.3866	74.434	35.5034	12.5503	15.2799	0.296976	57.6029	30.8435	100.584	20.6821	55.0871	36.438	40.6285	12.8941	81.6765	38.382	45.1295	8.91178	39.3486	32.031	34.327	79.9927	21.4553	43.9571	9.38096	36.6013	39.8566	46.4062	92.4339	47.8409	104.769	6.10278	51.0385	5.60608	22.3407	46.1931	25.2073	12.6101	13.308	55.6902	33.7988	61.6818	59.926	57.6795
CDH9	100.105	110.543	146.276	147.344	113.884	71.0737	113.394	68.2289	98.241	61.3986	110.353	117.236	112.406	59.7296	146.479	89.3602	117.692	66.7366	98.0524	99.4874	75.9454	43.742	164.383	67.6238	106.44	78.8598	92.9308	74.0462	113.66	77.7561	60.7404	99.4582	129.843	92.6716	104.306	94.7974	219.998	111.218	157.289	96.9048	147.865	127.73	81.2029	145.383	114.886	97.8887	195.453	156.431	140.817
CDK2AP1	3403.34	2988.57	2516.63	2613.98	3984.36	1689.84	1771.7	2242.91	2202.81	2613.98	2274.04	1329	3755.13	1650.69	3146.16	2463.14	2652.84	1584.37	2721.51	2387.46	2508.7	2740.2	1217.02	1638.07	3102.53	1693.47	2516.63	1890.41	2104.67	2001.01	1928.7	3035.86	2519.68	2470.68	2848.98	1815.74	2077.5	2639.73	1283.6	2264.59	4054.9	1267.51	2397.88	1245.73	2145.44	2523.94	1417.97	1309.53	1966.68
CDK2AP2	195.19	192.805	60.6217	137.182	129.8	214.973	165.789	176.907	163.444	169.793	189.956	184.33	101.126	159.027	138.326	223.341	157.043	132.416	265.15	122.757	193.779	150.542	58.2577	263.425	190.909	153.728	201.852	154.184	166.639	162.637	175.651	275.617	148.431	243.706	173.85	99.3349	158.823	224.633	226.574	149.373	171.701	189.956	235.993	326.394	233.524	199.888	183.702	187.113	148.946
CDK4	296.525	421.265	119.231	306.385	279.293	321.366	183.702	246.777	234.326	212.528	279.636	172.065	273.529	222.966	269.643	213.015	195.453	201.398	288.819	288.181	335.515	269.742	113.261	303.62	261.817	256.295	375.656	339.982	168.445	211.329	273.424	307.389	190.782	315.151	296.154	128.896	195.453	267.038	117.46	134.293	259.232	156.694	383.311	234.466	174.412	326.644	134.458	130.243	120.168
CDK5R1	342.523	231.898	307.14	274.789	298.15	131.175	299.776	379.526	534.847	588.639	320.721	541.533	238.859	261.696	283.591	410.583	434.079	486.352	187.185	252.389	344.55	355.528	514.371	287.045	265.829	214.464	190.978	348.601	354.438	412.208	261.922	275.812	300.228	395.601	565.801	704.143	261.817	400.796	544.539	574.938	491.945	287.045	179.66	434.707	339.112	124.663	752.054	715.957	585.785
CDK5RAP2	385.783	161.822	233.987	163.551	145.758	63.0904	225.93	146.961	206.446	224.067	220.973	159.666	263.431	213.365	215.668	117.168	583.238	141.057	141.5	192.69	136.244	133.61	408.474	114.526	254.996	236.346	143.091	174.549	149.6	386.951	295.726	210.8	279.01	198.249	228.326	245.769	204.48	212.841	946.034	978.612	208.919	197.293	240.526	334.182	521.506	168.452	89.4811	82.2092	175.64
CDK5RAP3	477.314	858.373	645.502	719.8	622.47	418.047	973.761	677.673	770.203	779.173	747.116	949.25	686.042	1174.49	615.74	693.449	716.851	763.827	580.242	624.997	770.726	771.525	621.386	604.439	578.935	920.754	660.076	650.498	878.587	1048.13	940.888	472.857	622.839	485.553	573.836	736.602	586.203	583.728	1100.72	765.194	373.541	1017.4	928.987	1040.49	1031.74	749.113	965.604	962.609	668.95
CDK6	289.59	266.591	257.939	253.011	267.038	239.139	171.02	252.801	327.147	310.315	197.443	262.933	267.311	173.056	204.35	180.138	104.504	201.918	215.256	264.965	254.409	274.978	140.216	195.623	270.411	169.95	187.563	415.37	133.585	176.965	189.69	276.982	200.432	258.034	272.323	118.584	253.255	244.069	163.4	115.795	197.443	237.169	287.588	242.367	224.943	214.973	193.461	226.727	99.368
CDK7	420.539	244.688	394.422	368.245	390.793	369.479	360.22	371.408	354.438	377.68	365.337	378.009	338.543	408.603	451.862	317.684	361.903	339.552	361.073	411.825	356.182	369.938	481.96	384.475	359.446	353.384	300.122	254.226	410.937	271.32	285.167	461.063	329.92	293.91	400.089	379.675	193.849	513.265	272.238	382.853	422.786	387.414	287.812	293.91	388.33	297.926	387.414	405.988	401.464
CDK9	274.186	220.308	172.671	268.329	320.984	141.551	301.209	297.792	224.467	222.398	212.675	374.226	342.523	290.961	228.031	237.847	206.748	224.135	222.398	264.288	257.297	241.675	156.046	235.389	294.041	246.365	229.371	290.302	304.572	423.383	379.359	263.249	233.524	222.732	272.238	363.457	211.404	342.091	241.95	245.826	302.758	440.438	262.751	507.749	360.064	225.414	397.069	438.432	276.377
CDKL1	45.169	42.228	35.4327	78.836	84.229	19.6972	42.1795	29.486	44.9629	39.1281	22.502	36.7942	80.7644	67.8591	103.021	24.78	39.5109	57.5489	33.6484	61.1399	61.0678	57.5664	54.5662	36.9442	58.205	28.9443	49.5298	46.588	35.1279	36.4028	55.3852	77.0679	80.9461	176.792	39.8566	73.5493	128.697	60.7223	45.3154	146.766	129.44	63.9163	21.5756	54.7544	65.2917	23.0802	26.0215	39.1836	145.245
CDKN1A	839.015	651.993	796.796	665.195	545.66	286.879	652.587	298.691	649.831	640.812	626.309	521.762	600.584	488.78	693.774	312.996	428.804	501.497	418.065	314.366	366.529	357.092	252.666	204.033	697.732	606.654	525.563	284.028	367.644	1010.95	646.322	551.462	685.772	337.622	453.686	412.372	789.963	479.07	694.396	571.645	412.021	608.066	621.505	566.435	798.407	754.13	648.677	571.919	402.382
CDKN1B	1562.96	1109.43	1299.72	1650.69	1915.12	1274.43	1148.02	1327.78	1281.28	1467.93	1464.99	1456.17	1587.72	1162.82	2032.36	1066.34	1475.39	991.779	1057.15	1780.24	1345.81	1249.18	1906.09	1060.47	1419.28	1190.01	976.067	830.567	1080.2	1068.91	1177.87	1589.39	1146.06	1095.03	1365.36	1833.94	1163.81	1628.84	1105.15	1365.36	1741.11	1344.57	1138.5	1271.17	1168.77	1139.51	1192.04	1258.88	1654.65
CDKN1C	40.2491	158.138	63.2922	129.727	158.823	40.1631	199.593	66.6519	221.269	192.392	126.653	211.404	99.9516	86.3034	29.7661	214.525	165.725	163.006	180.207	32.9972	165.452	154.236	9.08704	100.105	549.519	80.0886	340.273	84.1244	321.23	132.461	41.1546	141.222	76.18	201.792	167.23	63.3732	214.595	260.176	148.326	22.8009	217.403	167.528	398.41	122.174	84.6213	159.434	112.93	141.222	144.596
CDKN2AIP	243.462	213.163	319.372	251.914	281.52	334.806	205.836	284.114	260.176	308.316	212.085	216.696	300.673	246.365	263.817	173.166	165.272	195.501	196.855	288.608	242.367	273.638	327.932	208.234	209.964	249.772	171.89	190.978	208.836	225.476	259.332	259.147	219.1	177.137	272.736	326.524	147	263.923	165.005	224.221	254.767	242.446	162.083	231.663	192.931	176.077	215.714	204.918	194.062
CDKN2D	1456.35	645.533	1020.15	818.015	904.098	551.026	1050.18	869.221	1147.57	1116.82	1191.6	1516.73	765.262	495.706	1140.69	1429.3	1209	1226.87	780.182	931.429	1154.11	1004.38	1142.72	1254.19	1303.44	1127.05	769.148	890.739	769.73	1227.54	761.349	1094.12	1002.89	1060.58	923.703	1496.26	1300.73	1105.06	2124.49	1506.08	1469.4	1524.49	619.407	1262.03	1691.48	581.279	1218.49	1115.66	1828.03
CDR2	240.647	360.486	332.871	376.708	254.671	345.902	318.328	270.213	321.366	268.624	186.359	259.787	272.029	287.045	227.683	170.904	140.767	232.586	266.492	340.273	310.46	288.286	311.977	237.43	324.254	505.983	210.977	198.559	83.8501	321.366	492.908	286.515	199.96	216.332	227.683	241.757	176.74	297.664	133.924	272.441	168.96	331.154	293.122	346.368	363.312	274.186	182.975	191.583	125.117
CDS2	275.712	179.548	251.336	295.823	161.935	193.585	244.688	164.7	220.758	272.736	406.343	135.816	258.609	194.526	279.901	396.895	281.188	243.217	249.599	288.72	234.326	280.122	181.511	329.652	227.608	193.128	184.463	185.665	258.697	153.062	167.849	298.368	197.322	231.313	193.066	342.832	143.056	194.726	182.2	189.351	306.523	249.52	153.973	105.153	316.471	224.467	197.06	178.561	294.901
CDV3	390.82	331.771	590.775	362.389	404.596	743.018	303.987	425.242	285.728	316.81	354.683	341.393	402.642	454.242	336.616	380.782	312.949	371.159	351.982	417.697	343.503	396.784	677.606	411.591	365.823	329.876	322.301	450.321	428.678	333.404	513.259	384.09	439.186	325.427	347.91	400.616	298.044	395.717	331.632	367.924	374.061	300.615	264.768	276.37	304.021	338.952	325.124	312.337	349.79
CEACAM1	394.83	151.927	1140.29	247.416	289.657	130.015	430.2	389.295	364.048	354.856	1753.97	321.028	466.855	545.395	404.67	315.322	413.915	281.077	306.752	360.06	133.373	145.405	392.501	205.865	672.904	383.876	312.232	1478.55	585.826	360.537	269.436	326.482	384.014	348.54	444.851	409.94	587.625	586.501	859.701	433.16	357.499	427.853	344.308	187.421	691.28	301.925	219.095	260.272	983.722
CEACAM3	1263.73	240.823	357.072	622.659	460.837	181.628	846.583	354.258	540.126	502.808	935.199	808.351	621.343	667.621	841.535	898.394	1148.02	572.689	630.728	656.93	344.418	288.484	264.378	545.673	838.049	1032.88	631.857	511.633	536.267	685.538	428.825	634.139	634.479	565.534	873.623	1124.96	565.534	790.121	1515.5	825.062	741.008	831.102	576.161	681.765	880.833	742.574	1016.42	753.97	1019.66
CEACAM4	113.923	83.0302	78.8126	71.0936	61.7982	44.7723	125.821	42.2167	49.8257	66.3628	33.8824	113.777	55.0363	69.3062	63.2327	123.612	215.402	42.8007	100.362	81.6295	47.9019	36.6557	96.811	41.1546	93.2131	139.073	51.7577	55.0871	82.7456	116.804	69.5892	98.5939	83.2976	98.8331	124.238	209.457	73.3738	100.044	180.207	282.411	60.6613	123.714	117.13	92.957	102.333	102.947	143.217	124.512	145.608
CEACAM6	68.9781	12.508	442.363	26.7772	23.3778	187.563	144.746	8.93446	32.8744	38.0963	14.1992	54.1046	499.916	33.8751	162.347	79.5416	3.66635	70.1337	13.0565	36.7129	66.7576	66.6096	179.043	32.2503	28.0584	-0.249494	131.893	2803.71	224.854	4.78535	29.1979	17.0641	26.8049	622.659	114.987	122.132	66.1633	90.3157	94.1097	63.6052	347.87	64.8065	65.3553	1.12253	128.779	60.5828	10.5398	9.20969	42.5464
CEACAM8	339.982	55.5399	1222.57	72.29	77.6747	367.426	594.051	29.6061	91.4863	86.2748	23.8978	177.424	1311.85	158.876	440.619	360.331	34.8421	81.9415	45.9681	56.1316	133.878	135.055	238.195	101.972	126.804	52.1787	307.951	6913.4	693.668	21.2892	175.81	81.6765	134.458	1697.26	584.867	375.181	123.105	198.615	621.343	278.876	790.597	266.937	173.328	25.6667	384.298	480.284	24.9565	59.0581	116.572
CEBPA	919.201	562.314	597.664	642.305	547.641	632.484	847.57	595.36	687.254	753.97	483.865	990.362	635.48	812.69	580.648	824.595	1168.77	1022.1	703.271	816.925	871.956	904.529	731.466	607.168	755.927	540.126	738.1	1345.81	1579.07	1115.7	523.515	444.426	880.364	1167.89	676.787	1075.99	462.973	744.015	1961.87	1076.83	517.447	692.041	655.85	700.687	970.769	690.546	888.795	893.638	785.177
CEBPB	12365	9673.68	9086.77	8734.98	9371.65	6804.95	11669.6	9731.52	11215.1	11604.3	12679.4	10975.4	7353.1	10850.2	10031.6	19125	19125	11474.5	10230.8	8217.25	9828.77	10122.3	11881.9	11401	11881.9	11276.4	10499.2	7843.77	14267.1	12154.9	7721.78	8254.72	9777.65	12436.2	9777.65	11732.3	7843.77	11149.4	15611	20136.5	11532.9	11474.5	9464.96	10283.8	13242.5	10031.6	12761.5	13063	16104.2
CEBPD	5491.15	5056.65	3547.5	4496.64	4681.66	4939.17	5378.32	5440.46	5720.41	5529.06	5041.33	5272.22	4291.74	4740.64	5302.1	12436.2	7498.55	6103.57	9569.92	4531.02	6508.05	6483.1	5491.15	6830.43	4644.89	4831.45	4585.53	3908.69	6294.06	5029.02	3659.42	4806.41	5425.13	8023.43	6830.43	6189.59	3994.4	5546.4	7353.1	9313.02	7811.59	5737.73	5272.22	5841.16	4644.89	4484.88	8661.95	8950.71	10230.8
CEBPE	146.226	102.889	112.794	73.8164	98.9956	74.9472	153.587	273.529	177.54	197.699	29.4558	84.229	121.572	118.709	110.282	74.4561	86.9618	59.0194	66.2844	117.569	134.633	110.502	34.1642	148.48	131.647	115.506	106.65	350.238	84.4195	97.6412	100.819	78.3448	173.79	243.133	102.068	36.9853	90.6973	91.805	209.109	36.4586	98.9956	95.096	135.852	120.664	236.172	161.885	100.198	135.727	47.3741
CEBPG	197.636	251.336	265.06	234.326	199.815	223.497	181.894	224.298	225.091	211.666	206.883	217.55	218.475	191.277	159.906	214.894	189.286	238.859	252.097	213.874	280.563	252.59	248.624	242.201	237.926	166.853	215.256	286.282	329.652	151.947	196.794	223.341	193.72	250.434	224.943	172.178	179.043	218.868	219.998	126.21	185.665	173.55	245.485	145.902	194.726	211.478	217.403	215.936	235.118
CEBPZ	440.03	527.707	653.281	545.971	419.973	711.879	581.924	512.73	481.744	438.826	486.832	295.46	504.014	414.428	335.515	413.296	352.609	490.087	532.091	509.554	480.957	499.165	626.582	506.486	393.793	469.584	472.473	559.293	441.751	448.797	566.462	395.097	514.652	311.977	426.466	384.795	252.801	396.575	163.539	581.287	383.523	334.677	450.589	308.074	277.089	383.311	275.184	323.385	319.903
CECR1	750.258	1401.33	383.289	973.73	1211.57	1654.62	540.304	912.316	1103.02	1073.99	1216.46	1035.48	1015.05	665.321	811.194	1253.9	821.903	912.642	1044.84	767.572	1082.7	1057.04	249.413	789.632	1121.02	536.753	1297.83	706.976	932.292	667.931	703.261	846.487	667.285	990.581	913.018	319.242	1311.11	926.179	950.547	356.605	797.802	692.353	1222.11	971.741	695.076	1350.59	985.915	927.811	623.229
CECR5	715.069	408.603	465.145	623.027	552.977	353.223	623.027	510.855	454.163	416.109	485.618	629.659	630.728	630.728	486.604	501.594	372.939	362.505	401.84	611.22	457.811	445.965	407.727	505.022	717.666	558.331	437.033	468.023	476.016	588.639	559.899	635.809	496.614	527.707	604.083	359.616	290.847	752.054	419.973	388.883	605.708	524.6	449.366	576.407	480.284	391.317	518.529	566.826	437.033
CECR6	124.631	154.716	70.3314	75.269	53.4408	114.886	129.26	59.2965	184.33	174.192	121.823	163.132	91.8322	89.1334	104.834	786.723	449.366	189.351	114.511	117.984	197.133	182.014	93.4468	275.712	81.5978	92.6716	140.082	103.727	257.667	100.92	77.0117	100.884	162.754	162.288	67.051	154.579	86.8839	110.779	238.013	124.427	92.9067	82.8518	150.652	86.9847	86.8839	163.498	204.498	209.042	148.624
CENPB	736.281	723.902	1559.39	759.434	592.747	811.562	978.081	791.594	624.686	550.12	836.486	770.44	736.281	997.347	650.438	535.697	661.027	476.016	834.875	675.188	613.871	545.366	1086.51	753.529	761.127	1030.6	765.867	669.432	712.189	1187.67	1183.38	800.264	637.287	646.519	659.168	659.943	545.971	735.316	729.282	561.701	740.544	800.856	970.092	929.81	987.631	822.915	841.05	867.225	506.486
CENPT	262.12	471.501	78.5902	204.297	192.458	366.946	167.849	205.195	232.489	217.639	131.598	204.635	212.875	146.618	153.687	355.202	207.793	194.319	537.335	157	237.43	203.279	58.4516	411.491	220.308	200.303	332.093	184.277	139.803	155.347	162.912	230.366	195.501	232.941	199.521	120.357	217.121	188.635	220.224	164.383	171.179	235.308	342.7	236.172	233.863	319.372	180.021	159.223	176.077
CENTA1	77.0958	61.2126	51.4262	62.3553	51.9372	101.611	78.6644	89.0482	75.966	81.3878	81.1706	100.263	44.7462	66.4841	28.2706	219.618	141.419	147.777	160.185	50.9429	90.202	80.6363	64.1932	129.26	58.909	65.2917	66.9695	124.394	201.036	73.9709	42.6111	50.2817	124.019	160.234	54.3929	48.3728	34.5006	63.3295	180.305	54.3396	51.5424	67.3589	117.804	65.0381	88.4453	77.875	112.649	99.2112	57.5664
CENTA2	376.341	313.076	581.287	365.146	392.402	250.914	900.268	378.009	405.088	387.988	690.86	642.305	544.228	558.016	538.697	253.164	574.261	305.302	356.437	317.684	373.909	345.637	383.694	271.641	676.379	486.832	543.883	281.608	736.281	967.927	458.037	277.089	481.506	318.442	320.848	377.044	268.136	549.836	529.286	457.811	379.526	591.527	461.063	591.527	588.311	508.262	613.283	668.662	329.652
CENTB1	554.645	1068.91	245.826	765.287	626.246	751.739	518.781	933.847	615.627	656.93	623.354	941.437	617.019	804.77	722.308	979.559	892.442	973.965	883.274	731	842.563	813.251	398.08	972.702	470.583	614.616	688.115	1197.68	838.049	923.729	819.173	590.947	764.314	880.833	685.954	593.688	476.526	535.697	1820.46	832.629	506.246	876.528	1099.89	1016.42	890.579	826.659	713.095	772.42	515.124
CENTB2	556.491	389.043	778.91	522.159	496.123	383.989	445.258	481.744	435.256	491.945	580.084	644.261	446.16	528.49	670.146	486.352	585.785	467.086	341.402	514.652	440.619	457.437	1049.01	369.653	432.456	430.225	376.53	511.125	645.765	469.584	496.614	413.824	490.317	395.772	537.088	868.986	456.608	543.25	676.787	527.066	509.791	546.518	347.108	488.707	501.594	342.832	713.906	699.479	747.212
CENTD2	221.758	240.208	163.182	220.233	206.686	157.69	304.446	201.98	239.012	215.64	198.506	331.583	190.904	200.917	234.398	286.146	371.757	280.61	214.914	243.828	212.545	169.834	194.616	200.696	219.014	257.192	235.195	206.726	313.341	311.925	168.977	200.996	282.032	287.047	233.973	294.149	307.267	194.247	497.754	269.994	221.341	330.605	255.947	299.604	252.452	230.406	361.023	339.589	287.961
CENTD3	2613.98	1796.3	2069.18	2052.82	1738.74	872.509	2394.56	1771.7	1355.92	1379.73	1576.07	2757.66	1782.23	2362	2584.98	2639.73	2205.47	2012.06	2255.7	2766.7	1585.87	1555.76	2323.91	2047.52	2255.7	2044.83	1300.84	1592.97	2757.66	2296.57	1435.89	2085.47	2140.69	1877.01	2215.63	2963.13	1283.6	1336.53	2516.63	2433.32	2178.39	1571.15	1709.5	1751.77	2019.64	1549.73	2175.92	2158.67	3151.61
CENTG3	180.477	223.906	81.7307	167.23	133.965	111.794	188.562	123.343	106.068	106.388	99.8866	171.335	137.235	139.401	136.64	99.0226	152.029	102.458	155.542	140.172	120.092	101.575	51.8623	125.576	174.632	166.692	180.021	64.3517	82.7696	143.015	115.506	172.178	88.8601	157.239	149.23	72.9902	129.764	153.771	234.173	115.055	138.989	164.6	194.062	209.888	169.234	197.902	196.794	193.645	122.326
CEP110	206.174	256.384	328.724	345.767	385.104	228.104	165.725	281.976	303.727	315.527	444.803	224.943	291.084	316.816	273.036	194.133	155.596	295.02	172.614	347.233	304.312	345.767	256.202	204.161	273.853	237.085	246.289	362.82	240.078	215.627	335.642	221.058	218.796	194.392	241.757	206.95	289.703	239.843	210.405	138.714	216.404	208.723	256.384	224.135	253.011	216.978	200.764	190.649	254.487
[truncated: 5,140 more rows]
[truncated: 48 more columns]
