# Supplementary material for: A novel lncRNA-miRNA-mRNA triple network identifies lncRNA XIST as a biomarker for acute myocardial infarction
Source: Aging (Albany NY). 2022 May 10;14(9):4085–106. doi: 10.18632/aging.204075 (PMC9134965; doi:10.18632/aging.204075)
Supplement: Supplementary Table 3 [file aging-14-204075-s004.xls]

## Sheet: Supplementary Table3
Supplementary Table 3. Disease phenotypes of 114 samples.
ID	Gender	BMI	Diabetes	Hypertention	Age	height	weight	SBP	DBP	PP	Smoking
GSM843870	1	NA	0	0	67.77	160	NA	126	70.5	55.5	0
GSM843871	1	25.3515	0	1	67.84	172	75	157.5	87.5	70	0
GSM843872	2	30.8248	0	0	66.07	168	87	122.5	77.5	45	0
GSM843873	1	35.1541	1	0	67.26	172	104	125	75	50	0
GSM843874	1	31.1791	0	0	51.65	168	88	132.5	75	57.5	0
GSM843875	1	34.7178	0	0	62.03	178	110	127.5	77.5	50	0
GSM843876	2	24.4444	0	0	76.59	150	55	130	80	50	0
GSM843877	2	40.625	1	1	77.64	160	104	150	80	70	0
GSM843878	2	33.2671	1	1	75	157	82	150	80	70	0
GSM843879	1	30.0408	0	1	51	175	92	140	90	50	0
GSM843880	1	30.0408	0	1	51	175	92	140	90	50	0
GSM843881	1	38.1039	0	1	55.21	162	100	145	95	50	0
GSM843882	2	20.7031	0	0	72.59	160	53	130	75	55	0
GSM843883	2	29.7576	1	0	73.57	166	82	137.5	77.5	60	0
GSM843884	2	39.5554	1	0	47.5	159	100	137.5	80	57.5	0
GSM843885	2	NA	0	1	46.84	NA	NA	160	92.5	67.5	0
GSM843886	2	28.7201	0	0	72.87	155	69	NA	NA	NA	0
GSM843887	1	26.2507	0	0	53.77	181	86	130	80	50	1
GSM843888	1	26.2507	0	0	53.77	181	86	130	80	50	1
GSM843889	1	28.3419	0	0	52.36	185	97	130	85	45	1
GSM843890	1	27.4717	0	1	51.69	183	92	145	85	60	0
GSM843891	2	26.1719	0	0	65.89	160	67	95	50	45	0
GSM843892	2	40.1639	1	1	73.34	157	99	170	85	85	0
GSM843893	1	31.1614	0	1	59.87	169	89	140	80	60	1
GSM843894	1	33.564	0	1	65.78	170	97	145	90	55	0
GSM843895	1	30.3871	0	0	63.7	174	92	122.5	77.5	45	0
GSM843896	1	30.3673	1	0	69.85	175	93	NA	NA	NA	0
GSM843897	2	40.7712	0	0	58.05	162	107	130	85	45	0
GSM843898	2	40.7712	0	0	58.05	162	107	130	85	45	0
GSM843899	1	22.3081	0	0	59.95	164	60	130	72.5	57.5	1
GSM843900	1	30.8012	0	0	75.32	155	74	130	82.5	47.5	0
GSM843901	1	22.8374	0	0	55.81	170	66	NA	NA	NA	0
GSM843902	1	26.493	0	1	55.98	177	83	147.5	87.5	60	0
GSM843903	2	31.3465	0	0	78.57	144	65	135	80	55	0
GSM843904	1	NA	0	0	52.1	NA	NA	NA	NA	NA	1
GSM843905	2	31.5556	0	0	78.69	150	71	130	80	50	0
GSM843906	2	34.1749	0	1	73.41	153	80	140	95	45	0
GSM843907	1	27.3438	1	0	66.19	160	70	127.5	80	47.5	1
GSM843908	2	30.2978	1	0	73.56	152	70	137.5	80	57.5	0
GSM843909	1	30.4834	0	1	59.56	166	84	162.5	95	67.5	1
GSM843910	1	38.1963	0	1	57.57	172	113	140	95	45	0
GSM843911	2	30.5428	1	1	73.95	147	66	145	85	60	0
GSM843912	1	29.0606	1	1	79.39	169	83	162.5	65	97.5	0
GSM843913	1	32.1929	0	1	59.63	178	102	145	85	60	1
GSM843914	2	26.7698	0	0	46.87	164	72	135	85	50	0
GSM843915	1	24.8591	0	0	57.4	169	71	127.5	80	47.5	1
GSM843916	1	24.8591	0	0	57.4	169	71	127.5	80	47.5	1
GSM843917	1	33.1777	0	0	67.94	161	86	120	77.5	42.5	0
GSM843918	1	37.3702	0	0	61.81	170	108	NA	NA	NA	0
GSM843919	1	30.2992	0	0	57.83	178	96	132.5	82.5	50	1
GSM843920	1	32.2708	0	1	55.58	167	90	150	80	70	0
GSM843921	2	28.6726	0	1	73.5	154	68	157.5	90	67.5	0
GSM843922	1	27.4587	0	0	54.4	178	87	117.5	80	37.5	1
GSM843923	2	NA	0	0	78.44	156	NA	NA	NA	NA	0
GSM843924	2	23.2834	1	0	76.29	148	51	125	65	60	0
GSM843925	1	34.1124	0	0	57.76	166	94	137.5	80	57.5	0
GSM843926	2	25.4767	1	1	73.25	156	62	142.5	77.5	65	0
GSM843927	1	NA	0	0	53.69	NA	NA	127.5	70	57.5	1
GSM843928	1	NA	0	1	60.05	NA	NA	147.5	92.5	55	1
GSM843929	1	30.8594	1	0	70.34	160	79	127.5	80	47.5	0
GSM843930	1	30.8594	1	0	70.34	160	79	127.5	80	47.5	0
GSM843931	1	32.3689	0	0	58.61	174	98	125	80	45	0
GSM843932	1	22.3435	0	0	74.41	177	70	112.5	65	47.5	0
GSM843933	1	36.8278	1	0	61.92	179	118	127.5	77.5	50	0
GSM843934	1	29.3848	0	1	63.28	165	80	145	80	65	0
GSM843935	1	26.4721	0	0	64.77	176	82	117.5	75	42.5	0
GSM843936	1	26.3329	1	0	63.29	171	77	125	80	45	1
GSM843937	1	35.1562	0	1	73.48	160	90	155	95	60	0
GSM843938	1	25.1808	1	1	70.65	176	78	142.5	95	47.5	0
GSM843939	2	27.6888	1	0	79.35	159	70	135	80	55	0
GSM843940	2	37.8906	0	1	70.8	160	97	147.5	80	67.5	1
GSM843941	2	33.3108	1	1	47.97	154	79	140	85	55	0
GSM843942	1	28.306	0	1	66.45	166	78	140	80	60	0
GSM843943	2	34.2466	1	0	78.49	146	73	135	75	60	0
GSM843944	1	32.526	1	1	73.67	170	94	162.5	75	87.5	0
GSM843945	1	NA	0	0	61.82	NA	NA	135	75	60	1
GSM843946	1	35.1885	0	0	62.37	176	109	115	82.5	32.5	0
GSM843947	1	33.126	0	0	70.31	172	98	NA	NA	NA	0
GSM843948	1	29.7578	1	0	77.91	170	86	117.5	65	52.5	0
GSM843949	1	26.6436	0	0	58.52	170	77	132.5	85	47.5	0
GSM843950	1	31.378	0	0	59.71	174	95	127.5	82.5	45	0
GSM843951	1	26.2773	0	0	55.16	183	88	NA	NA	NA	1
GSM843952	1	29.4118	1	1	71.79	170	85	145	87.5	57.5	0
GSM843953	1	26.8817	0	0	51.4	186	93	125	75	50	0
GSM843954	1	29.0657	0	0	69.63	170	84	130	80	50	0
GSM843955	1	19.0311	0	1	56	170	55	140	90	50	1
GSM843956	1	26.1224	1	1	62.75	175	80	145	80	65	0
GSM843957	1	24.2123	1	1	79.73	176	75	155	85	70	0
GSM843958	1	26.5625	1	0	71.9	160	68	130	70	60	0
GSM843959	1	26.5625	1	0	71.9	160	68	130	70	60	0
GSM843960	2	25.3902	0	0	70.18	155	61	115	65	50	1
GSM843961	2	25.8022	0	0	57.55	146	55	120	66	54	0
GSM843962	2	25.8022	0	0	57.55	146	55	120	66	54	0
GSM843963	1	32.3685	0	1	55.16	163	86	150.5	87	63.5	1
GSM843964	2	NA	1	0	78.65	NA	NA	NA	NA	NA	0
GSM843965	1	30.4915	0	0	59.56	182	101	121	74	47	0
GSM843966	2	29.1545	1	0	77.27	147	63	107.5	72.5	35	0
