# Supplementary material for: A novel lncRNA-miRNA-mRNA triple network identifies lncRNA XIST as a biomarker for acute myocardial infarction
Source: Aging (Albany NY). 2022 May 10;14(9):4085–106. doi: 10.18632/aging.204075 (PMC9134965; doi:10.18632/aging.204075)
Supplement: Supplementary Table 4 [file aging-14-204075-s005.xls]

## Sheet: Supplementary Table4
Supplementary Table 4. Total of 995 genes in the turquoise module.
geneSymbol	moduleColor	Gene Significance	p.GS
SCLT1	turquoise	0.449967	3.76e-06
ERO1L	turquoise	0.422807	1.6e-05
NT5C2	turquoise	0.412845	2.64e-05
PPP2R3C	turquoise	0.409048	3.18e-05
CHUK	turquoise	0.397404	5.56e-05
TANK	turquoise	0.392837	6.89e-05
RHOT1	turquoise	0.389461	8.05e-05
DHRS8	turquoise	0.387301	8.89e-05
JAK2	turquoise	0.386233	9.33e-05
PLEKHF2	turquoise	0.386165	9.36e-05
BTBD10	turquoise	0.385047	9.84e-05
SLMAP	turquoise	0.377963	0.000135168
CDC42	turquoise	0.376966	0.000141252
TMEM55A	turquoise	0.376817	0.000142182
C14orf129	turquoise	0.376713	0.000142838
C1orf63	turquoise	0.372029	0.000175304
CMTM6	turquoise	0.365868	0.000228432
ZFYVE16	turquoise	0.363588	0.000251603
PGM2	turquoise	0.362011	0.000268886
PDZD8	turquoise	0.360163	0.000290517
MLSTD1	turquoise	0.358645	0.000309473
BLZF1	turquoise	0.358565	0.000310514
EPS15	turquoise	0.356581	0.000337089
STX7	turquoise	0.354318	0.000369963
LXN	turquoise	0.353608	0.000380861
GCA	turquoise	0.352974	0.000390853
RB1CC1	turquoise	0.351771	0.000410461
USP15	turquoise	0.351247	0.000419297
DCP2	turquoise	0.349823	0.000444159
MAP3K2	turquoise	0.349625	0.00044771
OTUD1	turquoise	0.348342	0.000471449
CHMP2B	turquoise	0.348315	0.000471956
ZDHHC17	turquoise	0.348151	0.000475078
GTF2IP1	turquoise	0.347784	0.00048211
C14orf100	turquoise	0.34645	0.000508547
SNX10	turquoise	0.346332	0.000510947
SLK	turquoise	0.345321	0.000531935
C10orf97	turquoise	0.345066	0.000537363
MIER1	turquoise	0.344989	0.000539011
TBK1	turquoise	0.344805	0.000542962
RPGR	turquoise	0.343529	0.000571102
RSBN1L	turquoise	0.342926	0.00058487
FOXN2	turquoise	0.341779	0.000611888
LIN7A	turquoise	0.341738	0.000612876
UBE2W	turquoise	0.341292	0.000623711
RAB21	turquoise	0.340633	0.00064003
CPEB3	turquoise	0.340289	0.000648716
SELT	turquoise	0.339541	0.000667941
GNAI3	turquoise	0.339382	0.000672107
ZSWIM6	turquoise	0.339002	0.000682123
C1orf119	turquoise	0.338892	0.000685044
HERC4	turquoise	0.337536	0.000722108
ZNF294	turquoise	0.336997	0.000737339
PCMTD1	turquoise	0.335998	0.000766316
KIF5B	turquoise	0.335486	0.000781591
SULT1B1	turquoise	0.334697	0.000805675
PAK2	turquoise	0.334238	0.000819983
JMJD1C	turquoise	0.33369	0.000837367
LCOR	turquoise	0.333379	0.000847374
PTGS2	turquoise	0.33266	0.000870947
SNX16	turquoise	0.331533	0.00090914
CYB5R4	turquoise	0.330413	0.000948552
ARHGAP24	turquoise	0.330031	0.000962375
USP32	turquoise	0.32973	0.000973382
GBE1	turquoise	0.329467	0.000983101
RICTOR	turquoise	0.32904	0.000999036
ARFIP1	turquoise	0.326825	0.00108563
STAG2	turquoise	0.326714	0.00109017
SLC16A6	turquoise	0.326375	0.00110403
ACOX1	turquoise	0.325967	0.00112098
PTEN	turquoise	0.325909	0.00112341
LEMD3	turquoise	0.325906	0.00112352
OACT2	turquoise	0.324996	0.00116223
RRM2B	turquoise	0.324063	0.00120319
RUNDC1	turquoise	0.323346	0.00123554
RP2	turquoise	0.322565	0.00127163
ARIH1	turquoise	0.321966	0.00130001
SORL1	turquoise	0.321733	0.00131121
NUMB	turquoise	0.321338	0.00133033
CCDC128	turquoise	0.320908	0.00135151
C4orf34	turquoise	0.32029	0.00138242
VPS4B	turquoise	0.320279	0.00138298
GNA13	turquoise	0.320269	0.00138347
VCPIP1	turquoise	0.32007	0.00139358
GTF2F2	turquoise	0.319955	0.00139945
KLHL2	turquoise	0.319013	0.00144838
CD58	turquoise	0.318728	0.00146352
USP8	turquoise	0.318702	0.00146485
ZMPSTE24	turquoise	0.318469	0.00147734
BCL10	turquoise	0.318402	0.00148094
ST8SIA4	turquoise	0.316739	0.00157295
FAM8A1	turquoise	0.316684	0.00157609
ARID4A	turquoise	0.315384	0.00165171
C18orf25	turquoise	0.314974	0.00167621
CENTB2	turquoise	0.312841	0.00180918
CBX1	turquoise	0.312635	0.00182256
LRRK2	turquoise	0.310395	0.00197339
MAK	turquoise	0.310362	0.00197567
AGTPBP1	turquoise	0.309121	0.00206408
STXBP3	turquoise	0.309034	0.00207048
PIAS1	turquoise	0.307961	0.00214996
FAM45A	turquoise	0.307626	0.00217543
THAP1	turquoise	0.307053	0.00221942
DDX59	turquoise	0.306881	0.00223283
ARPC5	turquoise	0.306825	0.00223717
NFKBIZ	turquoise	0.306589	0.00225575
IFNGR1	turquoise	0.303854	0.00248058
OSTF1	turquoise	0.303646	0.00249849
EXOC8	turquoise	0.303363	0.00252301
RIT1	turquoise	0.303238	0.00253394
NCOA4	turquoise	0.303192	0.00253794
LOC88523	turquoise	0.302274	0.00261946
ST3GAL6	turquoise	0.301828	0.00265998
ZMYM2	turquoise	0.301657	0.00267562
CASP8	turquoise	0.300897	0.00274618
TSG101	turquoise	0.300106	0.00282148
OSTM1	turquoise	0.298673	0.00296259
CNOT6	turquoise	0.298429	0.00298721
CCPG1	turquoise	0.297939	0.00303725
EDD1	turquoise	0.296707	0.00316639
C12orf35	turquoise	0.296491	0.00318956
KIAA0232	turquoise	0.295371	0.00331206
KLHL8	turquoise	0.295073	0.00334534
SMG1	turquoise	0.294948	0.00335938
FBXL5	turquoise	0.294896	0.0033653
SERPINB1	turquoise	0.293975	0.00347058
PTPN12	turquoise	0.293962	0.00347212
LOC402176	turquoise	0.293622	0.00351171
CLK4	turquoise	0.293385	0.00353963
GPR160	turquoise	0.293305	0.00354908
LOC651309	turquoise	0.293269	0.00355332
BAZ1A	turquoise	0.292853	0.00360292
TLE4	turquoise	0.292697	0.00362165
HECW2	turquoise	0.292475	0.00364846
DOCK11	turquoise	0.292441	0.00365267
TSPAN2	turquoise	0.291159	0.00381131
SNAP23	turquoise	0.29052	0.00389265
CCDC126	turquoise	0.290268	0.00392516
AZIN1	turquoise	0.28998	0.00396253
VAV3	turquoise	0.289919	0.00397049
PHF3	turquoise	0.289606	0.00401169
UBLCP1	turquoise	0.289366	0.00404349
TIPARP	turquoise	0.288077	0.0042181
NFIL3	turquoise	0.287674	0.00427413
MAPK1	turquoise	0.287497	0.00429893
LRRFIP2	turquoise	0.287087	0.00435681
PPM1D	turquoise	0.286105	0.00449836
KBTBD7	turquoise	0.285567	0.00457761
KIAA1468	turquoise	0.285285	0.00461973
SERINC1	turquoise	0.285042	0.00465628
SEC22B	turquoise	0.284962	0.0046683
IFRD1	turquoise	0.284766	0.004698
DSC2	turquoise	0.284719	0.00470509
WAC	turquoise	0.284509	0.00473725
CCNT2	turquoise	0.283429	0.00490513
F2RL1	turquoise	0.282932	0.00498419
SENP6	turquoise	0.28261	0.00503608
ACSL1	turquoise	0.28122	0.00526534
FAM126B	turquoise	0.281046	0.0052947
SNX13	turquoise	0.279734	0.00552057
LYRM5	turquoise	0.279664	0.00553287
LPGAT1	turquoise	0.279572	0.00554911
STXBP5	turquoise	0.279017	0.00564771
RAB11FIP2	turquoise	0.278606	0.00572177
NFE2L2	turquoise	0.27855	0.00573185
PCF11	turquoise	0.278521	0.0057372
NUP153	turquoise	0.278444	0.00575109
HBP1	turquoise	0.278176	0.00580006
MAP2K1IP1	turquoise	0.278093	0.00581525
MAP3K8	turquoise	0.27631	0.00615125
GALNACT-2	turquoise	0.275796	0.00625107
LRRC42	turquoise	0.275046	0.00639966
ZNF33B	turquoise	0.27504	0.00640085
SRGN	turquoise	0.274457	0.00651848
FLJ12078	turquoise	0.274036	0.00660439
C1orf24	turquoise	0.273902	0.00663201
LOC388969	turquoise	0.273178	0.0067831
WBP4	turquoise	0.272905	0.00684068
CD55	turquoise	0.272588	0.00690832
SMCHD1	turquoise	0.272563	0.00691371
TM6SF1	turquoise	0.271163	0.0072192
SDCBP	turquoise	0.270318	0.00740949
RNF13	turquoise	0.270027	0.00747599
GNAQ	turquoise	0.26943	0.00761411
MYNN	turquoise	0.269102	0.00769102
ING1	turquoise	0.268276	0.00788754
IQGAP1	turquoise	0.268208	0.00790388
SPAG9	turquoise	0.267956	0.0079647
OBFC2A	turquoise	0.267748	0.00801524
TSHZ3	turquoise	0.267722	0.00802162
PELI2	turquoise	0.267193	0.00815182
CCNG2	turquoise	0.266544	0.00831387
C9orf66	turquoise	0.266501	0.00832471
MGEA5	turquoise	0.266286	0.00837915
PAPOLA	turquoise	0.265735	0.00851991
SLC25A14	turquoise	0.265159	0.00866948
RAB27A	turquoise	0.26509	0.00868756
PBEF1	turquoise	0.264553	0.00882914
PAN3	turquoise	0.263419	0.00913503
HIF1A	turquoise	0.263035	0.00924059
PPP4R2	turquoise	0.262858	0.00928969
UBL3	turquoise	0.262555	0.00937415
MAP4K4	turquoise	0.262482	0.00939477
HMGB2	turquoise	0.262457	0.00940163
ATP6V1A	turquoise	0.261279	0.00973777
PAIP2	turquoise	0.26116	0.00977227
CD302	turquoise	0.261135	0.0097795
SLC35E3	turquoise	0.261066	0.00979958
TSNAX	turquoise	0.260554	0.00994946
PPP1R3D	turquoise	0.260409	0.00999247
FCGR3B	turquoise	0.260219	0.0100487
C14orf138	turquoise	0.260181	0.01006
OLAH	turquoise	0.259127	0.0103786
MORC3	turquoise	0.258803	0.0104783
LAMP2	turquoise	0.258196	0.0106671
TP53INP1	turquoise	0.258184	0.0106706
ZNF354A	turquoise	0.257436	0.0109076
STK17B	turquoise	0.257243	0.0109695
KIAA1600	turquoise	0.255708	0.0114726
CRIPT	turquoise	0.255605	0.0115073
MAOA	turquoise	0.255464	0.0115545
PRKAR1A	turquoise	0.255372	0.0115854
NRBF2	turquoise	0.254241	0.0119722
TUFT1	turquoise	0.253651	0.0121786
TMEM59	turquoise	0.253439	0.0122535
KIAA1434	turquoise	0.253314	0.0122978
FAM49A	turquoise	0.252928	0.0124354
C3orf34	turquoise	0.252684	0.0125231
RALBP1	turquoise	0.252632	0.0125417
TLR2	turquoise	0.251924	0.0128001
C16orf69	turquoise	0.251851	0.0128268
ATXN1	turquoise	0.25172	0.0128753
ARFGEF1	turquoise	0.251127	0.0130962
E2F3	turquoise	0.250334	0.0133964
HIATL1	turquoise	0.250251	0.0134283
RAB5A	turquoise	0.250214	0.0134425
MNDA	turquoise	0.250057	0.0135026
SLU7	turquoise	0.249079	0.0138839
CEP63	turquoise	0.24883	0.0139827
CIR	turquoise	0.248712	0.0140297
CYP1B1	turquoise	0.24868	0.0140422
MCL1	turquoise	0.248489	0.0141187
RSPRY1	turquoise	0.248484	0.0141207
MYO5A	turquoise	0.248219	0.0142271
LOC391045	turquoise	0.247505	0.0145175
RNF141	turquoise	0.246394	0.0149796
PPP1R3B	turquoise	0.245824	0.0152214
MEFV	turquoise	0.245751	0.0152525
RUNX2	turquoise	0.245681	0.0152829
PRKAA1	turquoise	0.245393	0.0154068
ABCA1	turquoise	0.245213	0.0154844
GABPA	turquoise	0.244205	0.0159271
STX3	turquoise	0.243773	0.0161202
USP9X	turquoise	0.242372	0.0167603
USP3	turquoise	0.241937	0.0169633
EVI2B	turquoise	0.241826	0.0170156
SUV420H1	turquoise	0.241589	0.0171275
PLXDC2	turquoise	0.241358	0.0172371
ARID4B	turquoise	0.241077	0.0173713
LBR	turquoise	0.240651	0.0175765
BCAT1	turquoise	0.240605	0.0175987
TOR1AIP1	turquoise	0.240502	0.017649
LOC645895	turquoise	0.240357	0.0177192
RNF149	turquoise	0.239919	0.017934
AHCTF1	turquoise	0.238731	0.0185273
RBM18	turquoise	0.237773	0.0190181
CBL	turquoise	0.237667	0.0190731
CREBBP	turquoise	0.237066	0.0193875
GMFB	turquoise	0.236826	0.0195143
FBXO33	turquoise	0.236462	0.0197081
ZNF217	turquoise	0.236427	0.0197265
CCDC28A	turquoise	0.23623	0.0198321
RBPJ	turquoise	0.236058	0.0199247
NCF2	turquoise	0.235982	0.0199658
C14orf43	turquoise	0.235732	0.0201013
CEP135	turquoise	0.235694	0.0201221
ZNF281	turquoise	0.235252	0.0203635
CFLAR	turquoise	0.234175	0.0209627
NUDT16P	turquoise	0.234097	0.0210063
TOPBP1	turquoise	0.23297	0.0216509
PDE3B	turquoise	0.232854	0.0217181
SNRK	turquoise	0.232203	0.0220991
ZFP106	turquoise	0.231388	0.0225834
FPRL1	turquoise	0.231268	0.0226557
RLF	turquoise	0.230635	0.0230393
IK	turquoise	0.230616	0.023051
FLJ22662	turquoise	0.23029	0.0232513
FBXO11	turquoise	0.22997	0.0234489
TXNDC3	turquoise	0.229691	0.0236223
TMCC3	turquoise	0.229651	0.023647
DAZAP2	turquoise	0.229618	0.0236679
ATP11B	turquoise	0.229492	0.0237469
SKAP2	turquoise	0.229368	0.0238246
PJA2	turquoise	0.229365	0.0238263
PSCDBP	turquoise	0.228424	0.0244239
VPS35	turquoise	0.227889	0.0247695
YTHDF3	turquoise	0.227675	0.024909
VNN2	turquoise	0.227313	0.0251463
TEX2	turquoise	0.227108	0.0252815
ME2	turquoise	0.226574	0.0256367
SOS2	turquoise	0.225686	0.0262362
OSGIN2	turquoise	0.225523	0.0263481
ARG1	turquoise	0.224817	0.0268348
LOC653117	turquoise	0.224403	0.0271245
CREB5	turquoise	0.22434	0.0271687
IDS	turquoise	0.223845	0.0275185
WDR20	turquoise	0.22373	0.0276
PICALM	turquoise	0.223514	0.0277542
REPS2	turquoise	0.223371	0.0278568
KIAA0528	turquoise	0.223032	0.0281011
PHF23	turquoise	0.222962	0.0281519
CUTC	turquoise	0.222647	0.0283808
KCTD20	turquoise	0.222528	0.0284678
HAL	turquoise	0.222372	0.0285819
RTN3	turquoise	0.221821	0.0289887
AFF4	turquoise	0.221313	0.029368
C3orf62	turquoise	0.220779	0.0297709
SLCO4C1	turquoise	0.220067	0.0303162
PCTP	turquoise	0.219639	0.0306478
CD46	turquoise	0.219406	0.0308296
TRIB1	turquoise	0.219288	0.0309217
RAB1A	turquoise	0.218951	0.031187
ZYG11B	turquoise	0.218734	0.0313588
RNF38	turquoise	0.218071	0.031889
ABHD3	turquoise	0.218047	0.0319079
STAM2	turquoise	0.217761	0.0321393
TOPORS	turquoise	0.217115	0.0326663
ZNF403	turquoise	0.217041	0.0327267
STEAP4	turquoise	0.216677	0.0330276
SRPK1	turquoise	0.216639	0.0330585
MDM4	turquoise	0.215403	0.0340976
LOC643011	turquoise	0.21537	0.0341261
ADAM10	turquoise	0.215081	0.0343727
STAMBP	turquoise	0.214383	0.0349756
PELI1	turquoise	0.213861	0.0354324
LY96	turquoise	0.213794	0.0354918
KBTBD2	turquoise	0.213603	0.0356597
SPTLC2	turquoise	0.213595	0.0356674
MGAM	turquoise	0.213039	0.0361615
RGS2	turquoise	0.212692	0.0364728
ANTXR2	turquoise	0.212674	0.0364894
TGFBR2	turquoise	0.211372	0.0376792
MAP3K5	turquoise	0.210877	0.0381394
RFFL	turquoise	0.209895	0.0390679
FBXO38	turquoise	0.209012	0.0399179
LOC400924	turquoise	0.20894	0.0399883
RRAGC	turquoise	0.208637	0.0402838
RBMS1	turquoise	0.208277	0.0406375
TRIM24	turquoise	0.207196	0.0417162
CLPX	turquoise	0.206552	0.0423697
NSMAF	turquoise	0.206207	0.0427225
SFT2D1	turquoise	0.20472	0.0442752
ZNF516	turquoise	0.204315	0.0447055
CHSY1	turquoise	0.20393	0.0451183
SLC36A1	turquoise	0.2039	0.0451505
IRAK4	turquoise	0.203099	0.04602
LOC729030	turquoise	0.202285	0.0469174
ABHD5	turquoise	0.202171	0.0470444
EXOC6	turquoise	0.201519	0.0477761
SAMSN1	turquoise	0.201489	0.0478091
EFHC2	turquoise	0.201464	0.0478382
FBXL13	turquoise	0.200991	0.0483741
IRS2	turquoise	0.200274	0.0491981
SAP18	turquoise	0.20022	0.0492599
FLJ31951	turquoise	0.20007	0.049434
SNIP1	turquoise	0.199855	0.0496845
SVIL	turquoise	0.199034	0.0506482
GPBP1	turquoise	0.198867	0.050847
TBC1D15	turquoise	0.19872	0.0510212
TAF7	turquoise	0.197976	0.0519139
CTSS	turquoise	0.197916	0.0519863
TLR4	turquoise	0.197441	0.052564
BCL6	turquoise	0.197072	0.053016
FAM76B	turquoise	0.196966	0.0531467
ANKRD13A	turquoise	0.196452	0.0537832
AMD1	turquoise	0.19609	0.0542349
CALCOCO2	turquoise	0.195685	0.0547443
DDX3X	turquoise	0.195115	0.0554674
IRAK3	turquoise	0.194864	0.0557888
SLC31A2	turquoise	0.194845	0.0558124
SLC37A3	turquoise	0.194233	0.0566019
VNN3	turquoise	0.193983	0.0569265
TRAPPC6B	turquoise	0.193918	0.0570118
NCOA1	turquoise	0.193904	0.0570307
IVNS1ABP	turquoise	0.193768	0.0572077
SLA	turquoise	0.193247	0.0578936
PPP4R1	turquoise	0.193241	0.0579007
TMBIM4	turquoise	0.193085	0.0581073
LOC647834	turquoise	0.192811	0.0584715
CPD	turquoise	0.192693	0.058629
SIPA1L2	turquoise	0.191279	0.0605416
BAZ2B	turquoise	0.190894	0.061072
CAB39	turquoise	0.190829	0.0611616
LOC642684	turquoise	0.190688	0.0613557
RALB	turquoise	0.190554	0.0615426
SH3GLB1	turquoise	0.190426	0.0617198
SLC12A6	turquoise	0.190044	0.0622537
PFKFB2	turquoise	0.189952	0.0623834
UBE1C	turquoise	0.189943	0.0623951
PHF21A	turquoise	0.189413	0.0631432
MCTP2	turquoise	0.188802	0.0640159
DNAJC3	turquoise	0.188547	0.0643818
FKBP5	turquoise	0.188072	0.0650697
MAN2A2	turquoise	0.187146	0.0664264
SUMO1P1	turquoise	0.186811	0.0669231
PIK3CB	turquoise	0.186543	0.0673223
RNF34	turquoise	0.186285	0.0677086
SLC15A4	turquoise	0.186277	0.0677205
PDK3	turquoise	0.186137	0.0679317
FLJ39639	turquoise	0.185503	0.0688912
GNG2	turquoise	0.185112	0.0694886
LOC283547	turquoise	0.184413	0.0705674
TSC22D3	turquoise	0.184346	0.0706712
SLCO3A1	turquoise	0.184267	0.0707933
C7orf25	turquoise	0.184069	0.0711027
IL8RB	turquoise	0.183588	0.0718564
ERGIC1	turquoise	0.183448	0.0720775
ANKS1A	turquoise	0.18317	0.0725172
IL18RAP	turquoise	0.182708	0.0732542
ZNF20	turquoise	0.181414	0.0753464
REM2	turquoise	0.18129	0.0755503
C14orf11	turquoise	0.181033	0.0759731
SNX27	turquoise	0.178652	0.0799759
MOSC1	turquoise	0.177985	0.0811274
IL10RB	turquoise	0.177186	0.0825239
C3orf40	turquoise	0.176518	0.0837076
C20orf43	turquoise	0.175567	0.0854126
PURB	turquoise	0.173016	0.0901281
LOC144383	turquoise	0.172518	0.0910716
MYLIP	turquoise	0.172481	0.0911409
RCSD1	turquoise	0.172295	0.0914966
F5	turquoise	0.172036	0.0919926
ZC3HAV1	turquoise	0.171131	0.0937413
ACTN1	turquoise	0.170908	0.0941768
SLC36A4	turquoise	0.170222	0.0955249
DOCK5	turquoise	0.169897	0.0961693
C20orf121	turquoise	0.16879	0.0983878
CAPZA2	turquoise	0.168632	0.0987076
RNASEL	turquoise	0.167955	0.100089
LOC642112	turquoise	0.167881	0.10024
LILRA2	turquoise	0.167669	0.100676
SRBD1	turquoise	0.167621	0.100775
BEST1	turquoise	0.1676	0.100819
HERPUD2	turquoise	0.167326	0.101384
LOC653060	turquoise	0.166659	0.102773
SF3B14	turquoise	0.166546	0.103009
MXD1	turquoise	0.166022	0.104113
DAPK2	turquoise	0.164949	0.106401
GOLGA7	turquoise	0.164214	0.107993
TMEM43	turquoise	0.16351	0.109533
TMEM66	turquoise	0.163309	0.109974
C5orf30	turquoise	0.16249	0.111794
CLEC4E	turquoise	0.162285	0.112252
TM2D3	turquoise	0.160975	0.115219
BASP1	turquoise	0.160892	0.115409
DECR1	turquoise	0.160409	0.116522
EMR3	turquoise	0.159649	0.118285
CYBRD1	turquoise	0.159416	0.11883
TNPO3	turquoise	0.158574	0.120816
TPST1	turquoise	0.158445	0.121122
IGF1R	turquoise	0.158417	0.121188
TXNDC13	turquoise	0.158285	0.121504
CARD8	turquoise	0.158245	0.121599
AQP9	turquoise	0.157948	0.122308
PHTF1	turquoise	0.157834	0.122582
GPBP1L1	turquoise	0.156931	0.124763
STX12	turquoise	0.156437	0.12597
DUSP1	turquoise	0.156432	0.125981
DAAM2	turquoise	0.156166	0.126635
HIST1H2BE	turquoise	0.15608	0.126846
COQ10B	turquoise	0.15577	0.127612
PSMD6	turquoise	0.154832	0.129951
RFX2	turquoise	0.153819	0.132512
ACPL2	turquoise	0.153687	0.132849
USP4	turquoise	0.153612	0.133041
NLRC4	turquoise	0.152846	0.135008
SIRPA	turquoise	0.152547	0.135783
EXOC1	turquoise	0.152512	0.135874
IFNGR2	turquoise	0.15246	0.136008
FOS	turquoise	0.151913	0.137436
RNF122	turquoise	0.151875	0.137535
DIP2B	turquoise	0.151063	0.139675
LITAF	turquoise	0.150942	0.139996
PPFIA1	turquoise	0.150515	0.141135
RAB22A	turquoise	0.150465	0.141267
PECR	turquoise	0.150221	0.141922
JDP2	turquoise	0.149878	0.142843
TMCO3	turquoise	0.148538	0.146491
MBD4	turquoise	0.148456	0.146717
UBR2	turquoise	0.148349	0.147013
FLJ39575	turquoise	0.148253	0.147276
GAPVD1	turquoise	0.148239	0.147316
PPP1R15A	turquoise	0.14778	0.148588
GABARAPL1	turquoise	0.147611	0.149056
HK2	turquoise	0.146945	0.150919
CLEC4D	turquoise	0.146725	0.15154
OGFRL1	turquoise	0.145847	0.15403
SMAP1L	turquoise	0.145161	0.155998
GCC1	turquoise	0.144865	0.156851
EGLN1	turquoise	0.144796	0.157052
B4GALT5	turquoise	0.144595	0.157633
SSH2	turquoise	0.143687	0.160286
USP10	turquoise	0.142654	0.163346
TMEM49	turquoise	0.142643	0.163379
KIAA2026	turquoise	0.142256	0.164535
ARHGAP25	turquoise	0.142026	0.165228
LOC284757	turquoise	0.141837	0.165794
HCG27	turquoise	0.141512	0.166778
ARHGAP15	turquoise	0.141198	0.167732
THBD	turquoise	0.140927	0.168555
MKLN1	turquoise	0.140197	0.170794
S100A9	turquoise	0.139667	0.172434
KIF1B	turquoise	0.139212	0.17385
RBM22	turquoise	0.138333	0.176609
FLJ36874	turquoise	0.137738	0.178498
LOC440926	turquoise	0.137406	0.179556
ORM2	turquoise	0.137266	0.180002
LILRB3	turquoise	0.136083	0.183822
RAB32	turquoise	0.135355	0.186199
CD59	turquoise	0.135334	0.186268
PLCG2	turquoise	0.135155	0.186858
DRAM	turquoise	0.132992	0.194077
IL18R1	turquoise	0.132625	0.19532
C1RL	turquoise	0.131784	0.198195
LRMP	turquoise	0.130048	0.204219
IKIP	turquoise	0.12968	0.205516
RAB11FIP1	turquoise	0.129559	0.205941
MYBPC3	turquoise	0.129469	0.206258
SF3A1	turquoise	0.127913	0.21181
NDUFB3	turquoise	0.127705	0.212561
RNF103	turquoise	0.127642	0.212789
LOC653610	turquoise	0.126531	0.216829
PFTK1	turquoise	0.125867	0.219272
NFKBIA	turquoise	0.125732	0.21977
ERLIN1	turquoise	0.125131	0.222
TGFA	turquoise	0.125055	0.222282
RABGEF1	turquoise	0.124988	0.222535
LOC651143	turquoise	0.124804	0.223221
CD163	turquoise	0.122648	0.231383
LOC552891	turquoise	0.122219	0.233031
EIF2C4	turquoise	0.121987	0.233924
PGCP	turquoise	0.121286	0.236644
H3F3B	turquoise	0.120664	0.239072
CXCL1	turquoise	0.120202	0.24089
RSBN1	turquoise	0.119562	0.243421
B4GALT4	turquoise	0.119202	0.244854
ZNF746	turquoise	0.118878	0.246151
LRRC6	turquoise	0.118142	0.249106
UTX	turquoise	0.117543	0.251531
ARPC2	turquoise	0.117176	0.253025
IL1R2	turquoise	0.115394	0.260364
ELF2	turquoise	0.113281	0.269253
LCP1	turquoise	0.113171	0.26972
ARHGAP19	turquoise	0.112912	0.270827
DIRC2	turquoise	0.111962	0.274903
NSFL1C	turquoise	0.111839	0.275433
ZNF143	turquoise	0.111753	0.275806
DHRS7	turquoise	0.111176	0.278307
BTG1	turquoise	0.110118	0.282936
STX6	turquoise	0.110113	0.28296
CYP4F3	turquoise	0.109932	0.283755
N-PAC	turquoise	0.109742	0.284593
RAD23B	turquoise	0.109635	0.285067
ORM1	turquoise	0.109469	0.285802
JMJD1B	turquoise	0.109416	0.286034
PFKFB4	turquoise	0.108543	0.289918
GMFG	turquoise	0.108036	0.292191
ADCY4	turquoise	0.107455	0.294812
ST6GALNAC2	turquoise	0.107442	0.294868
SASP	turquoise	0.107229	0.295835
SLC45A4	turquoise	0.106274	0.30018
TMEM127	turquoise	0.105709	0.302774
KIAA0367	turquoise	0.105303	0.304643
BMX	turquoise	0.105266	0.304816
RPGRIP1	turquoise	0.104954	0.306259
PADI4	turquoise	0.102167	0.319349
MAP2K4	turquoise	0.101438	0.322834
DNTTIP1	turquoise	0.100715	0.326312
NDEL1	turquoise	0.100576	0.326987
HIST1H2BC	turquoise	0.0985107	0.337066
QPCT	turquoise	0.0969495	0.344816
CHMP1B	turquoise	0.0961094	0.349033
MYADM	turquoise	0.0959606	0.349783
MBOAT1	turquoise	0.0955351	0.351934
OSBPL9	turquoise	0.0948127	0.355604
CD97	turquoise	0.0940034	0.359744
CLDN14	turquoise	0.0937217	0.361191
KIAA1754	turquoise	0.093477	0.362452
SIRPB1	turquoise	0.0928994	0.365438
RAB7A	turquoise	0.0925285	0.367364
ETV6	turquoise	0.0925008	0.367508
TCFL5	turquoise	0.0920946	0.369625
SNN	turquoise	0.0912002	0.374311
KCNJ15	turquoise	0.0893064	0.384353
NSUN7	turquoise	0.0874956	0.394105
HN1	turquoise	0.0874139	0.394549
LOC642373	turquoise	0.0873143	0.395089
OSBPL2	turquoise	0.0863162	0.400535
TREM1	turquoise	0.0839762	0.413475
PFKFB3	turquoise	0.0836501	0.415297
VPS37C	turquoise	0.0824325	0.422143
PIGB	turquoise	0.0801023	0.435424
LOC642342	turquoise	0.0788181	0.442844
ALOX5AP	turquoise	0.0787885	0.443015
APH1B	turquoise	0.0767997	0.454648
SLC9A8	turquoise	0.0744005	0.468903
FADD	turquoise	0.073616	0.473616
KIAA0040	turquoise	0.0735008	0.47431
FLJ42957	turquoise	0.0708764	0.490275
CASC3	turquoise	0.0707651	0.490959
RAB31	turquoise	0.0706626	0.491589
TRIM39	turquoise	0.0703456	0.493539
DUSP11	turquoise	0.0699039	0.496263
LOC440731	turquoise	0.0684954	0.505002
TMEM185B	turquoise	0.0681745	0.507005
DDIT3	turquoise	0.067388	0.511929
RAF1	turquoise	0.0669488	0.51469
RFWD2	turquoise	0.0668733	0.515165
STK4	turquoise	0.0667897	0.515692
NUDT16	turquoise	0.064918	0.527553
PBX2	turquoise	0.0648767	0.527816
ARHGDIB	turquoise	0.0645517	0.529889
SLC2A3	turquoise	0.0642221	0.531997
GAB2	turquoise	0.0637836	0.534808
TXN	turquoise	0.0634895	0.536696
FTH1	turquoise	0.0631932	0.538603
ECHDC3	turquoise	0.0622204	0.544885
MTHFS	turquoise	0.0619819	0.546431
ZBTB16	turquoise	0.0607403	0.554511
ICAM3	turquoise	0.0596194	0.561856
SYTL3	turquoise	0.0592041	0.564588
KIAA1267	turquoise	0.0584732	0.569413
NOV	turquoise	0.0569522	0.579516
MPZL1	turquoise	0.0530306	0.605936
FLJ10357	turquoise	0.0515059	0.616349
CRISPLD2	turquoise	0.0499313	0.627184
ATP6V1B2	turquoise	0.048776	0.635184
ARID3A	turquoise	0.044467	0.665388
PISD	turquoise	0.0409668	0.690326
CD93	turquoise	0.0388264	0.705742
SLC25A44	turquoise	0.0372828	0.716934
HSPBAP1	turquoise	0.0365788	0.722059
GPR97	turquoise	0.0352761	0.731575
RBM23	turquoise	0.032384	0.752843
CSNK1D	turquoise	0.0318485	0.756801
PANX2	turquoise	0.028806	0.779411
PACSIN2	turquoise	0.0282605	0.783485
MYL6	turquoise	0.0272571	0.790994
MMP25	turquoise	0.0262993	0.798179
MARCKS	turquoise	0.0258153	0.801816
OPLAH	turquoise	0.0201655	0.844569
AP1G1	turquoise	0.0197991	0.847359
IGF2R	turquoise	0.0120744	0.906558
VNN1	turquoise	0.00137136	0.989364
MME	turquoise	0.00042972	0.996667
C17orf45	turquoise	-0.00249266	0.980668
GPX3	turquoise	-0.00390301	0.969734
SPATA2L	turquoise	-0.00571778	0.955673
C13orf18	turquoise	-0.00657328	0.949049
ZSCAN16	turquoise	-0.00803841	0.937713
MSRA	turquoise	-0.0131202	0.898506
GMPR2	turquoise	-0.0140108	0.891657
EFCBP2	turquoise	-0.0150072	0.884003
RASGEF1A	turquoise	-0.020437	0.842503
TBC1D14	turquoise	-0.0269735	0.79312
TP53INP2	turquoise	-0.0286825	0.780333
HSPA1L	turquoise	-0.0312568	0.761183
CHIC2	turquoise	-0.0375501	0.714992
CMTM2	turquoise	-0.0378469	0.712837
PTPRE	turquoise	-0.0395994	0.70016
CCL23	turquoise	-0.0455387	0.657824
SLC20A1	turquoise	-0.0521416	0.611998
ACAA2	turquoise	-0.052291	0.610978
CALR	turquoise	-0.05849	0.569303
ABCC5	turquoise	-0.0602977	0.557406
ATP5B	turquoise	-0.0728956	0.477967
SCRN1	turquoise	-0.0818399	0.425498
PDHA1	turquoise	-0.0839618	0.413555
MRPS15	turquoise	-0.0877162	0.392909
CDS2	turquoise	-0.0917976	0.371177
ABHD10	turquoise	-0.0943049	0.358197
KIFAP3	turquoise	-0.0961744	0.348705
MT1F	turquoise	-0.0966496	0.346318
LRRC8D	turquoise	-0.103479	0.313142
RPL39	turquoise	-0.105673	0.302939
LOC149224	turquoise	-0.108216	0.291385
KARS	turquoise	-0.108687	0.289275
MRPL46	turquoise	-0.109542	0.285476
GPR114	turquoise	-0.112738	0.271568
CD244	turquoise	-0.120478	0.239803
EEF2K	turquoise	-0.121291	0.236625
RPS17	turquoise	-0.126842	0.215692
CX3CR1	turquoise	-0.128552	0.209519
CKAP5	turquoise	-0.129513	0.206105
TRFP	turquoise	-0.131926	0.197706
MRPL15	turquoise	-0.13261	0.195373
CCDC115	turquoise	-0.133944	0.190874
LOC374395	turquoise	-0.136846	0.181352
CREB3L2	turquoise	-0.13825	0.176871
TMEM14C	turquoise	-0.142003	0.165296
PDCD2	turquoise	-0.144453	0.158047
LRRC41	turquoise	-0.145571	0.15482
PYCR2	turquoise	-0.148069	0.147786
TMC8	turquoise	-0.148816	0.145729
C2orf28	turquoise	-0.14939	0.144166
SNRPF	turquoise	-0.149638	0.143493
C4orf14	turquoise	-0.150088	0.142278
FNBP4	turquoise	-0.150252	0.141839
MRPL21	turquoise	-0.151192	0.139333
TIGA1	turquoise	-0.151276	0.139112
HDDC3	turquoise	-0.152314	0.136389
AGK	turquoise	-0.153222	0.134038
STATIP1	turquoise	-0.153792	0.132581
DDX18	turquoise	-0.156456	0.125922
TUBA1B	turquoise	-0.156659	0.125427
ALDH16A1	turquoise	-0.157625	0.123085
TMEM85	turquoise	-0.157982	0.122227
MAD1L1	turquoise	-0.160184	0.117041
LOC647000	turquoise	-0.160539	0.116221
BOLA3	turquoise	-0.163558	0.109426
POGK	turquoise	-0.165494	0.105234
GLS	turquoise	-0.166508	0.10309
MCM3AP	turquoise	-0.167993	0.10001
GTF3A	turquoise	-0.168361	0.0992598
SLC25A28	turquoise	-0.168679	0.0986133
NDUFA3	turquoise	-0.170902	0.094189
RPL12	turquoise	-0.171024	0.0939502
GUSB	turquoise	-0.174209	0.0878971
NDUFS5	turquoise	-0.174321	0.0876912
RCC2	turquoise	-0.174688	0.0870151
MCM7	turquoise	-0.176649	0.0834738
COX5A	turquoise	-0.177693	0.0816352
ZNF526	turquoise	-0.179806	0.0780154
MBTPS1	turquoise	-0.1803	0.0771877
LY9	turquoise	-0.180423	0.0769825
IL10RA	turquoise	-0.180689	0.0765403
NDUFA9	turquoise	-0.180853	0.0762699
LOC649821	turquoise	-0.180891	0.0762071
ATF5	turquoise	-0.181728	0.0748348
AYP1p1	turquoise	-0.183173	0.0725125
LOC285900	turquoise	-0.183465	0.0720513
LOC401019	turquoise	-0.183862	0.0714262
C17orf61	turquoise	-0.185174	0.0693938
GNPTG	turquoise	-0.186276	0.0677227
EIF3S6IP	turquoise	-0.187081	0.066523
LOC645688	turquoise	-0.187278	0.0662318
COMT	turquoise	-0.18734	0.0661411
ITGB7	turquoise	-0.188168	0.0649296
PSMB7	turquoise	-0.190129	0.0621351
HPS6	turquoise	-0.190202	0.0620329
ACAD9	turquoise	-0.190459	0.0616746
ARHGAP17	turquoise	-0.190702	0.0613375
RANGAP1	turquoise	-0.191093	0.0607976
NDUFS8	turquoise	-0.19135	0.0604449
USP24	turquoise	-0.191872	0.0597337
RBM14	turquoise	-0.193282	0.0578468
LOC651767	turquoise	-0.19572	0.0546992
ATP13A1	turquoise	-0.195972	0.0543822
ADCK2	turquoise	-0.196019	0.0543235
GPI	turquoise	-0.196563	0.0536445
DPAGT1	turquoise	-0.19752	0.0524677
MIF4GD	turquoise	-0.198196	0.0516487
C6orf49	turquoise	-0.199193	0.0504603
P2RY8	turquoise	-0.199672	0.0498978
ACO2	turquoise	-0.199777	0.0497753
PTDSS1	turquoise	-0.199869	0.049668
COMMD1	turquoise	-0.199991	0.0495254
PI16	turquoise	-0.200374	0.0490824
C18orf17	turquoise	-0.200786	0.0486088
PCSK7	turquoise	-0.201866	0.0473851
MRPL43	turquoise	-0.202073	0.0471538
ZC3HC1	turquoise	-0.202289	0.0469134
ST3GAL5	turquoise	-0.203324	0.0457749
HINT1	turquoise	-0.203324	0.0457749
LOC127295	turquoise	-0.203397	0.0456952
ZNHIT3	turquoise	-0.203756	0.0453061
PRMT1	turquoise	-0.204512	0.0444956
LGTN	turquoise	-0.205198	0.043771
HSD17B8	turquoise	-0.205375	0.0435855
ARHGAP4	turquoise	-0.206493	0.0424293
SIAHBP1	turquoise	-0.206699	0.0422195
GOT2	turquoise	-0.206897	0.0420185
EMG1	turquoise	-0.209937	0.0390279
RPAIN	turquoise	-0.210664	0.0383393
URM1	turquoise	-0.210782	0.0382286
COX7C	turquoise	-0.211177	0.0378601
BSCL2	turquoise	-0.211414	0.0376397
BOLA2B	turquoise	-0.212135	0.0369784
LOC283412	turquoise	-0.213661	0.0356088
XYLT2	turquoise	-0.214026	0.0352873
NUP62	turquoise	-0.214155	0.0351745
COG2	turquoise	-0.214513	0.0348632
KIAA0194	turquoise	-0.214573	0.0348109
LOC650283	turquoise	-0.215413	0.0340893
ATP1A1	turquoise	-0.215736	0.0338152
NGRN	turquoise	-0.215873	0.0336997
SLC25A3	turquoise	-0.216409	0.0332501
SNORA70	turquoise	-0.2165	0.0331746
MORC2	turquoise	-0.216747	0.0329695
PEX11B	turquoise	-0.218437	0.0315949
APEX1	turquoise	-0.218636	0.0314365
SSRP1	turquoise	-0.218894	0.0312321
UXT	turquoise	-0.21952	0.0307402
NAPSB	turquoise	-0.219741	0.0305683
POLR2I	turquoise	-0.220007	0.030362
C6orf129	turquoise	-0.220032	0.0303431
ITPA	turquoise	-0.220761	0.0297846
DUS3L	turquoise	-0.221699	0.0290792
POMGNT1	turquoise	-0.221798	0.0290059
AES	turquoise	-0.222002	0.0288541
ZNF593	turquoise	-0.223407	0.027831
PFKP	turquoise	-0.224004	0.0274054
C11orf2	turquoise	-0.224559	0.0270152
SSR4	turquoise	-0.225279	0.0265151
RASSF7	turquoise	-0.226402	0.0257521
GIMAP5	turquoise	-0.22681	0.025479
FAM62A	turquoise	-0.227354	0.0251194
MRPS27	turquoise	-0.227471	0.0250426
LOC388564	turquoise	-0.228689	0.0242545
ALKBH6	turquoise	-0.229178	0.0239443
PDXP	turquoise	-0.230278	0.0232582
RPL19	turquoise	-0.230682	0.0230111
MLH1	turquoise	-0.231634	0.0224362
MGC11257	turquoise	-0.231725	0.0223821
HDAC1	turquoise	-0.231783	0.0223473
B4GALT7	turquoise	-0.232976	0.0216473
SHMT2	turquoise	-0.233592	0.0212933
FAM108A2	turquoise	-0.23421	0.0209428
COPZ1	turquoise	-0.234644	0.0206997
C16orf30	turquoise	-0.23567	0.0201351
LOC339123	turquoise	-0.236283	0.0198039
SNRPD2	turquoise	-0.236462	0.0197079
ATIC	turquoise	-0.236693	0.0195851
ATP5G2	turquoise	-0.23683	0.019512
RPS19	turquoise	-0.236907	0.0194715
JTV1	turquoise	-0.237188	0.0193233
APEH	turquoise	-0.23721	0.0193119
GPSN2	turquoise	-0.23809	0.0188546
RC74	turquoise	-0.238479	0.0186556
COMMD6	turquoise	-0.238664	0.0185613
SARS2	turquoise	-0.238696	0.0185453
C10orf33	turquoise	-0.239034	0.0183746
MUM1	turquoise	-0.239051	0.0183657
ZNF342	turquoise	-0.240262	0.0177655
TPM2	turquoise	-0.240724	0.0175411
LOC347292	turquoise	-0.240759	0.0175243
EMD	turquoise	-0.241762	0.0170459
UBE2G2	turquoise	-0.241853	0.0170031
GDPD5	turquoise	-0.241901	0.0169804
RPL36	turquoise	-0.243592	0.0162017
FBXO31	turquoise	-0.243651	0.0161754
RPUSD3	turquoise	-0.243799	0.0161087
C19orf58	turquoise	-0.244442	0.0158223
MRPL24	turquoise	-0.245322	0.0154375
ZNF511	turquoise	-0.245517	0.0153531
LOC347544	turquoise	-0.246625	0.0148824
RPS25	turquoise	-0.247416	0.014554
TSFM	turquoise	-0.247981	0.0143233
C14orf112	turquoise	-0.248176	0.0142444
LOC649447	turquoise	-0.249403	0.0137568
CYC1	turquoise	-0.249494	0.0137211
ZDHHC14	turquoise	-0.249599	0.01368
G6PC3	turquoise	-0.250684	0.0132631
GPR172A	turquoise	-0.250948	0.0131633
VPS52	turquoise	-0.250959	0.0131592
SRP68	turquoise	-0.251213	0.0130638
MAP4K1	turquoise	-0.252322	0.0126542
FLAD1	turquoise	-0.252473	0.0125994
SLC25A23	turquoise	-0.252555	0.0125697
ALKBH5	turquoise	-0.253016	0.0124038
TMEM141	turquoise	-0.25361	0.0121928
SND1	turquoise	-0.254355	0.0119328
LOC642250	turquoise	-0.255387	0.0115804
RPS20	turquoise	-0.2579	0.0107603
MUTYH	turquoise	-0.257991	0.0107313
CUTA	turquoise	-0.258672	0.0105186
AKR1B1	turquoise	-0.25869	0.0105131
ILF2	turquoise	-0.259282	0.0103311
GALT	turquoise	-0.259529	0.010256
RPP21	turquoise	-0.259793	0.0101765
ALG3	turquoise	-0.260174	0.0100622
SNRP70	turquoise	-0.260244	0.0100414
USP36	turquoise	-0.260589	0.00993921
RING1	turquoise	-0.261045	0.00980552
DCTD	turquoise	-0.261129	0.00978127
ANAPC5	turquoise	-0.261641	0.00963319
RBM4B	turquoise	-0.261736	0.00960624
TMEM109	turquoise	-0.263921	0.0089986
SLC25A5	turquoise	-0.265155	0.00867053
FBL	turquoise	-0.265591	0.0085571
SLC3A2	turquoise	-0.265772	0.0085104
TMC6	turquoise	-0.266099	0.00842672
MDH2	turquoise	-0.267463	0.00808508
MRPL54	turquoise	-0.267647	0.00803998
SNRPA	turquoise	-0.267664	0.00803589
PCNT	turquoise	-0.269463	0.00760634
CD6	turquoise	-0.269548	0.00758668
RPS5	turquoise	-0.269591	0.00757658
NUP210	turquoise	-0.271378	0.00717152
LTB	turquoise	-0.271934	0.00704959
LOC390354	turquoise	-0.272861	0.00685017
NUP93	turquoise	-0.27408	0.00659543
LOC440737	turquoise	-0.274242	0.00656223
CALM3	turquoise	-0.274627	0.0064839
LOC341457	turquoise	-0.274768	0.00645545
NAT10	turquoise	-0.274916	0.00642566
LOC51035	turquoise	-0.275052	0.00639839
TH1L	turquoise	-0.275092	0.00639047
ILF3	turquoise	-0.27519	0.00637089
NOLA2	turquoise	-0.275393	0.00633059
DPP7	turquoise	-0.276901	0.00603791
PTPRCAP	turquoise	-0.277076	0.00600476
LZTR1	turquoise	-0.277766	0.00587563
PEA15	turquoise	-0.278222	0.00579163
C12orf57	turquoise	-0.282808	0.00500406
NMRAL1	turquoise	-0.283181	0.00494451
RPS14	turquoise	-0.283672	0.004867
C22orf28	turquoise	-0.285465	0.00459287
UCKL1	turquoise	-0.286219	0.00448176
NSMCE1	turquoise	-0.287163	0.00434604
SIGIRR	turquoise	-0.287743	0.0042645
HSD17B10	turquoise	-0.287831	0.00425218
DDX39	turquoise	-0.28788	0.00424544
RNPS1	turquoise	-0.290358	0.00391345
TMEM101	turquoise	-0.290823	0.00385388
LDLRAP1	turquoise	-0.292238	0.00367732
LOC643433	turquoise	-0.292487	0.00364707
EIF3S4	turquoise	-0.292635	0.00362914
WDR6	turquoise	-0.293416	0.00353597
SAMM50	turquoise	-0.293546	0.00352064
TMEM173	turquoise	-0.294405	0.00342107
TUFM	turquoise	-0.295566	0.00329043
ECHS1	turquoise	-0.297225	0.00311153
UBQLN4	turquoise	-0.299438	0.00288649
DHRS3	turquoise	-0.299497	0.00288064
GIMAP6	turquoise	-0.29977	0.00285401
RPLP2	turquoise	-0.301251	0.00271311
SF3A2	turquoise	-0.302119	0.00263347
SCAMP3	turquoise	-0.303218	0.00253571
HINT2	turquoise	-0.303904	0.00247628
RPL8	turquoise	-0.305292	0.00235999
KIFC2	turquoise	-0.305398	0.00235128
LOC387841	turquoise	-0.307371	0.00219492
PSMB1	turquoise	-0.308639	0.0020994
HIGD2A	turquoise	-0.3096	0.00202953
LCK	turquoise	-0.309701	0.00202235
NDUFB11	turquoise	-0.310318	0.00197878
RPS10	turquoise	-0.311537	0.0018951
NME3	turquoise	-0.311681	0.00188545
DDX56	turquoise	-0.311715	0.00188315
NUDT14	turquoise	-0.313081	0.00179378
ABHD14A	turquoise	-0.314734	0.00169075
LOC441246	turquoise	-0.316414	0.00159151
MLLT6	turquoise	-0.316966	0.00156008
IMP4	turquoise	-0.317622	0.00152349
GPX4	turquoise	-0.32008	0.0013931
EVI5L	turquoise	-0.322589	0.00127051
XTP3TPA	turquoise	-0.324153	0.00119918
IER5	turquoise	-0.324559	0.00118126
SEPW1	turquoise	-0.324748	0.001173
POLR2F	turquoise	-0.325102	0.00115767
C21orf33	turquoise	-0.326113	0.00111489
C9orf23	turquoise	-0.326497	0.00109903
RANGNRF	turquoise	-0.326525	0.00109786
ZAP70	turquoise	-0.326817	0.00108597
PPIH	turquoise	-0.329575	0.000979101
ICAM2	turquoise	-0.330636	0.000940604
CENTG3	turquoise	-0.331528	0.000909291
HLA-DMA	turquoise	-0.333137	0.000855265
RUTBC1	turquoise	-0.336591	0.000748996
CPSF3L	turquoise	-0.337812	0.000714402
LSM7	turquoise	-0.338482	0.000696062
CIB1	turquoise	-0.343586	0.000569835
TEX264	turquoise	-0.344751	0.000544128
PIH1D1	turquoise	-0.347756	0.000482652
LONP1	turquoise	-0.348707	0.000464586
FBXL15	turquoise	-0.349626	0.000447704
HCST	turquoise	-0.349772	0.000445062
NOSIP	turquoise	-0.350562	0.000431089
VKORC1	turquoise	-0.351839	0.000409341
BIN1	turquoise	-0.352051	0.000405821
CYB561D2	turquoise	-0.352713	0.000395029
C16orf24	turquoise	-0.353886	0.00037656
LOC441775	turquoise	-0.354242	0.000371117
TSR2	turquoise	-0.354589	0.000365868
STK25	turquoise	-0.355367	0.00035438
EDF1	turquoise	-0.355425	0.000353536
KCTD17	turquoise	-0.356562	0.000337354
IDH3B	turquoise	-0.357271	0.000327617
CPSF1	turquoise	-0.368171	0.000207039
TRMT1	turquoise	-0.370893	0.000184149
PMPCA	turquoise	-0.375211	0.000152586
MGC13114	turquoise	-0.377969	0.000135133
POLE4	turquoise	-0.383478	0.000105677
DMAP1	turquoise	-0.417601	2.08e-05
