# Supplementary material for: A novel lncRNA-miRNA-mRNA triple network identifies lncRNA XIST as a biomarker for acute myocardial infarction
Source: Aging (Albany NY). 2022 May 10;14(9):4085–106. doi: 10.18632/aging.204075 (PMC9134965; doi:10.18632/aging.204075)
Supplement: Supplementary Table 5 [file aging-14-204075-s006.xls]

## Sheet: Supplementary Table5
Supplementary Table 5. KEGG pathway enrichment analyses for genes in the turquoise module.
Category	Term	Count	%	PValue	Genes	List Total	Pop Hits	Pop Total	Fold Enrichment	Bonferroni	Benjamini
KEGG_PATHWAY	hsa04144:Endocytosis	31	3.74849	2.31588e-05	TSG101, VPS4B, CBL, RAB22A, IGF1R, CDC42, RAB11FIP1, KIF5B, CHMP1B, VPS35, LDLRAP1, RAB11FIP2, EPS15, ARFGEF1, SH3GLB1, USP8, HSPA1L, VPS37C, ARPC5, IGF2R, TGFBR2, RAB31, ZFYVE16, ARPC2, BIN1, CHMP2B, CAPZA2, STAMBP, STAM2, RAB5A, RAB7A	383	241	6879	2.31031	0.00627948	0.0062992
KEGG_PATHWAY	hsa05142:Chagas disease (American trypanosomiasis)	18	2.17654	5.05999e-05	MAP2K4, CHUK, IFNGR1, IFNGR2, GNAI3, CFLAR, PIK3CB, FOS, IRAK4, TGFBR2, NFKBIA, CASP8, GNAQ, MAPK1, FADD, CALR, TLR4, TLR2	383	104	6879	3.10861	0.0136692	0.00688159
KEGG_PATHWAY	hsa05140:Leishmaniasis	13	1.57195	0.000469512	IFNGR1, NCF2, IFNGR2, FOS, IRAK4, PTGS2, NFKBIA, HLA-DMA, FCGR3B, MAPK1, JAK2, TLR4, TLR2	383	71	6879	3.2886	0.119915	0.0419932
KEGG_PATHWAY	hsa05152:Tuberculosis	22	2.66022	0.000753107	CREBBP, IFNGR1, IL10RB, IL10RA, IFNGR2, BCL10, IRAK4, CTSS, HLA-DMA, FCGR3B, CASP8, LAMP2, MAPK1, CALM3, FADD, JAK2, RAF1, CLEC4E, RAB5A, TLR4, RAB7A, TLR2	383	177	6879	2.23242	0.185289	0.0419932
KEGG_PATHWAY	hsa04668:TNF signaling pathway	16	1.9347	0.000771934	MAP2K4, CHUK, CXCL1, CFLAR, PIK3CB, FOS, PTGS2, NFKBIA, CASP8, CREB3L2, MAPK1, MAP3K8, FADD, IL18R1, CREB5, MAP3K5	383	107	6879	2.68573	0.189454	0.0419932
KEGG_PATHWAY	hsa05145:Toxoplasmosis	16	1.9347	0.00103374	GNAI3, HSPA1L, CHUK, IFNGR1, IL10RB, IL10RA, IFNGR2, LY96, IRAK4, NFKBIA, HLA-DMA, CASP8, MAPK1, JAK2, TLR4, TLR2	383	110	6879	2.61249	0.245216	0.046863
KEGG_PATHWAY	hsa04380:Osteoclast differentiation	17	2.05562	0.0023213	CHUK, IFNGR1, NCF2, IFNGR2, PIK3CB, FOS, GAB2, LILRB3, LILRA2, SIRPB1, TGFBR2, NFKBIA, FCGR3B, LCK, PLCG2, SIRPA, MAPK1	383	131	6879	2.3308	0.46854	0.0711939
KEGG_PATHWAY	hsa05010:Alzheimer's disease	20	2.41838	0.00233352	NDUFA9, MME, NDUFB11, NDUFA3, NDUFB3, ADAM10, ATP5G2, COX5A, COX7C, HSD17B10, ATP5B, CASP8, APH1B, NDUFS8, NDUFS5, GNAQ, MAPK1, CALM3, CYC1, FADD	383	168	6879	2.13819	0.470307	0.0711939
KEGG_PATHWAY	hsa05161:Hepatitis B	18	2.17654	0.00266753	MAP2K4, CREBBP, DDX3X, CHUK, PTEN, PIK3CB, FOS, NFKBIA, CASP8, TBK1, CREB3L2, MAPK1, E2F3, FADD, RAF1, TLR4, CREB5, TLR2	383	145	6879	2.22962	0.51642	0.0711939
KEGG_PATHWAY	hsa04068:FoxO signaling pathway	17	2.05562	0.00292874	CREBBP, PRKAA1, GABARAPL1, CHUK, PRMT1, PTEN, IRS2, PIK3CB, STK4, TGFBR2, IGF1R, G6PC3, BCL6, CCNG2, MAPK1, RAF1, SOS2	383	134	6879	2.27861	0.549675	0.0711939
KEGG_PATHWAY	hsa05215:Prostate cancer	13	1.57195	0.00321442	CREBBP, CHUK, PTEN, TGFA, PIK3CB, IGF1R, NFKBIA, CREB3L2, MAPK1, E2F3, RAF1, SOS2, CREB5	383	88	6879	2.65331	0.583443	0.0711939
KEGG_PATHWAY	hsa04660:T cell receptor signaling pathway	14	1.69287	0.00337744	VAV3, CHUK, PIK3CB, FOS, BCL10, CDC42, NFKBIA, ZAP70, LCK, MAPK1, MAP3K8, RAF1, PAK2, SOS2	383	100	6879	2.51452	0.601568	0.0711939
KEGG_PATHWAY	hsa03010:Ribosome	17	2.05562	0.00340265	MRPS15, RPS5, RPL12, MRPL15, RPL8, MRPL24, MRPL21, RPS14, RPS25, RPS17, RPS19, RPL36, RPLP2, RPS20, RPL39, RPS10, RPL19	383	136	6879	2.2451	0.6043	0.0711939
KEGG_PATHWAY	hsa00052:Galactose metabolism	7	0.846433	0.00536815	MGAM, GALT, G6PC3, AKR1B1, PGM2, HK2, PFKP	383	30	6879	4.19086	0.768707	0.101492
KEGG_PATHWAY	hsa04620:Toll-like receptor signaling pathway	14	1.69287	0.005597	MAP2K4, CHUK, LY96, PIK3CB, FOS, IRAK4, NFKBIA, CASP8, TBK1, MAPK1, MAP3K8, FADD, TLR4, TLR2	383	106	6879	2.37219	0.78274	0.101492
KEGG_PATHWAY	hsa05220:Chronic myeloid leukemia	11	1.33011	0.00606107	NFKBIA, CHUK, HDAC1, MAPK1, E2F3, GAB2, PIK3CB, CBL, RAF1, SOS2, TGFBR2	383	72	6879	2.74402	0.808646	0.103038
KEGG_PATHWAY	hsa04066:HIF-1 signaling pathway	13	1.57195	0.00656283	EGLN1, CREBBP, PDHA1, PFKFB3, IFNGR1, IFNGR2, PIK3CB, HIF1A, HK2, IGF1R, PLCG2, MAPK1, TLR4	383	96	6879	2.4322	0.833202	0.105005
KEGG_PATHWAY	hsa04064:NF-kappa B signaling pathway	12	1.45103	0.00834107	NFKBIA, ZAP70, CHUK, LCK, PLCG2, LY96, LTB, BCL10, CFLAR, IRAK4, PTGS2, TLR4	383	87	6879	2.47736	0.89754	0.114353
KEGG_PATHWAY	hsa04915:Estrogen signaling pathway	13	1.57195	0.00836623	GNAI3,HSPA1L, ADCY4, PIK3CB, FOS, GNAQ, CREB3L2, MAPK1, CALM3, RAF1, SOS2, FKBP5, CREB5	383	99	6879	2.35849	0.898245	0.114353
KEGG_PATHWAY	hsa05214:Glioma	10	1.20919	0.00921408	PTEN, PLCG2, MAPK1, TGFA, CALM3, E2F3, PIK3CB, RAF1, SOS2, IGF1R	383	65	6879	2.76321	0.919367	0.114353
KEGG_PATHWAY	hsa05212:Pancreatic cancer	10	1.20919	0.00921408	CDC42, RALBP1, RALB, CHUK, MAPK1, TGFA, E2F3, PIK3CB, RAF1, TGFBR2	383	65	6879	2.76321	0.919367	0.114353
KEGG_PATHWAY	hsa05134:Legionellosis	9	1.08827	0.00924914	NFKBIA, RAB1A, CASP8, HSPA1L, CXCL1, NLRC4, SEC22B, TLR4, TLR2	383	54	6879	2.99347	0.920139	0.114353
KEGG_PATHWAY	hsa05016:Huntington's disease	20	2.41838	0.00996255	NDUFA9, CREBBP, NDUFB11, HDAC1, NDUFA3, NDUFB3, ATP5G2, COX5A, COX7C, ATP5B, CASP8, NDUFS8, NDUFS5, GNAQ, CREB3L2, POLR2F, CYC1, SLC25A5, POLR2I, CREB5	383	192	6879	1.87092	0.934349	0.11518
KEGG_PATHWAY	hsa05211:Renal cell carcinoma	10	1.20919	0.010163	CDC42, EGLN1, CREBBP, MAPK1, TGFA, PIK3CB, RAF1, HIF1A, PAK2, SOS2	383	66	6879	2.72134	0.937867	0.11518
KEGG_PATHWAY	hsa05200:Pathways in cancer	34	4.11125	0.0106574	GNA13,RALB, HDAC1, ADCY4, GNAI3, PTEN, TGFA, PIK3CB, STK4, CBL, PTGS2, HIF1A, IGF1R, CDC42, CASP8, GNG2, PLCG2, MAPK1, E2F3, FADD, EGLN1, CREBBP, RALBP1, CHUK, ZBTB16, DAPK2, NCOA4, FOS, MLH1, TGFBR2, NFKBIA, GNAQ, RAF1, SOS2	383	393	6879	1.55386	0.945762	0.115952
KEGG_PATHWAY	hsa04662:B cell receptor signaling pathway	10	1.20919	0.0134529	VAV3, NFKBIA, CHUK, PLCG2, MAPK1, FOS, BCL10, PIK3CB, RAF1, SOS2	383	69	6879	2.60302	0.974879	0.140738
KEGG_PATHWAY	hsa05132:Salmonella infection	11	1.33011	0.0160421	CDC42, ARPC2, IFNGR1, IFNGR2, MAPK1, CXCL1, FOS, NLRC4, ARPC5, TLR4, RAB7A	383	83	6879	2.38035	0.987708	0.16161
KEGG_PATHWAY	hsa04666:Fc gamma R-mediated phagocytosis	11	1.33011	0.0173429	VAV3, CDC42, MARCKS, ARPC2, BIN1, PLCG2, MAPK1, GAB2, PIK3CB, ARPC5, RAF1	383	84	6879	2.35201	0.991423	0.163193
KEGG_PATHWAY	hsa04650:Natural killer cell mediated cytotoxicity	14	1.69287	0.0173992	VAV3, IFNGR1, IFNGR2, ICAM2, PIK3CB, ZAP70, FCGR3B, LCK, PLCG2, MAPK1, RAF1, HCST, SOS2, CD244	383	122	6879	2.06108	0.991556	0.163193
KEGG_PATHWAY	hsa04152:AMPK signaling pathway	14	1.69287	0.0185129	PFKFB2, PFKFB4, PRKAA1, PFKFB3, CAB39, IRS2, PIK3CB, IGF1R, G6PC3, EEF2K, PPP2R3C, CREB3L2, PFKP, CREB5	383	123	6879	2.04432	0.993797	0.166867
KEGG_PATHWAY	hsa04145:Phagosome	16	1.9347	0.0190179	ATP6V1A, STX12, NCF2, STX7, CTSS, HLA-DMA, TUBA1B, FCGR3B, LAMP2, ATP6V1B2, CALR, SEC22B, RAB5A, TLR4, RAB7A, TLR2	383	150	6879	1.91582	0.994607	0.166867
KEGG_PATHWAY	hsa04932:Non-alcoholic fatty liver disease (NAFLD)	16	1.9347	0.0200847	NDUFA9, PRKAA1, NDUFB11, NDUFA3, NDUFB3, IRS2, PIK3CB, COX5A, COX7C, CDC42, CASP8, NDUFS8, DDIT3, NDUFS5, CYC1, MAP3K5	383	151	6879	1.90313	0.995989	0.17072
KEGG_PATHWAY	hsa05230:Central carbon metabolism in cancer	9	1.08827	0.0243746	PDHA1, PTEN, MAPK1, PIK3CB, RAF1, HIF1A, HK2, PFKP, GLS	383	64	6879	2.52574	0.998784	0.200906
KEGG_PATHWAY	hsa05012:Parkinson's disease	15	1.81378	0.0256553	NDUFA9, NDUFB11, NDUFA3, LRRK2, NDUFB3, GNAI3, UBE2G2, ATP5G2, COX5A, COX7C, ATP5B, NDUFS8, NDUFS5, CYC1, SLC25A5	383	142	6879	1.89727	0.999149	0.205243
KEGG_PATHWAY	hsa00051:Fructose and mannose metabolism	6	0.725514	0.0300143	PFKFB2, PFKFB4, PFKFB3, AKR1B1, HK2, PFKP	383	32	6879	3.36766	0.999749	0.233254
KEGG_PATHWAY	hsa05164:Influenza A	17	2.05562	0.031817	TBK1,IVNS1ABP, MAP2K4, CREBBP, RNASEL, HSPA1L, IFNGR1, IFNGR2, PIK3CB, IRAK4, DNAJC3, NFKBIA, HLA-DMA, MAPK1, JAK2, RAF1, TLR4	383	174	6879	1.75479	0.999848	0.238291
KEGG_PATHWAY	hsa00500:Starch and sucrose metabolism	6	0.725514	0.0338199	GPI, MGAM, G6PC3, GBE1, PGM2, HK2	383	33	6879	3.26561	0.999914	0.238291
KEGG_PATHWAY	hsa05223:Non-small cell lung cancer	8	0.967352	0.0341668	PLCG2, MAPK1, TGFA, E2F3, PIK3CB, STK4, RAF1, SOS2	383	56	6879	2.56583	0.999922	0.238291
KEGG_PATHWAY	hsa04621:NOD-like receptor signaling pathway	8	0.967352	0.0341668	NFKBIA, CASP8, CHUK, CARD8, MAPK1, CXCL1, NLRC4, MEFV	383	56	6879	2.56583	0.999922	0.238291
KEGG_PATHWAY	hsa04910:Insulin signaling pathway	14	1.69287	0.0423564	PRKAA1, PDE3B, IRS2, PIK3CB, CBL, HK2, G6PC3, PRKAR1A, PPP1R3B, PPP1R3D, MAPK1, CALM3, RAF1, SOS2	383	138	6879	1.82211	0.999992	0.288024
KEGG_PATHWAY	hsa01130:Biosynthesis of antibiotics	19	2.29746	0.046851	PGM2,GPI, ECHS1, PDHA1, ACAA2, SHMT2, MDH2, ARG1, GOT2, NME3, PYCR2, HSD17B10, HK2, ZMPSTE24, ATIC, IDH3B, ACO2, BCAT1, PFKP	383	212	6879	1.6097	0.999998	0.310816
