# Supplementary material for: A novel lncRNA-miRNA-mRNA triple network identifies lncRNA XIST as a biomarker for acute myocardial infarction
Source: Aging (Albany NY). 2022 May 10;14(9):4085–106. doi: 10.18632/aging.204075 (PMC9134965; doi:10.18632/aging.204075)
Supplement: Supplementary Table 6 [file aging-14-204075-s007.xls]

## Sheet: Supplementary Table6
Supplementary Table 6. GO functional enrichment analyses for genes in the turquoise module.
Category	Term	Count	%	PValue	Genes	List Total	Pop Hits	Pop Total	Fold Enrichment	Bonferroni	Benjamini
GOTERM_BP_DIRECT	GO:0019083~viral transcription	17	2.05562	5.46739e-05	NUP210, RPS5, RPL12, NUP153, RPL8, NUP93, RPS14, RPS25, RPS17, RPS19, NUP62, RPL36, RPLP2, RPS20, RPL39, RPS10, RPL19	776	112	16792	3.28452	0.149933	0.162436
GOTERM_BP_DIRECT	GO:0000184~nuclear-transcribed mRNA catabolic process, nonsense-mediated decay	17	2.05562	0.000114485	SMG1, RPS5, RPL12, CASC3, RPL8, RPS14, RPS25, RPS17, RPS19, RPL36, RPLP2, RNPS1, RPS20, RPL39, RPS10, DCP2, RPL19	776	119	16792	3.09131	0.28834	0.170068
GOTERM_BP_DIRECT	GO:0006614~SRP-dependent cotranslational protein targeting to membrane	14	1.69287	0.000370436	RPS5, RPL12, SRP68, RPL8, RPS14, RPS25, RPS17, RPS19, RPL36, RPLP2, RPS20, RPL39, RPS10, RPL19	776	94	16792	3.22286	0.667385	0.249831
GOTERM_BP_DIRECT	GO:0006914~autophagy	17	2.05562	0.000418502	SH3GLB1, RAB1A, GABARAPL1, TSG101, USP10, PHF23, VPS4B, LRRK2, VPS37C, PIK3CB, TMEM59, RB1CC1, CHMP2B, NRBF2, S100A9, STAM2, UBQLN4	776	133	16792	2.76591	0.711664	0.249831
GOTERM_BP_DIRECT	GO:0032496~response to lipopolysaccharide	19	2.29746	0.000579994	CHUK, HDAC1, IL10RA, HMGB2, LY96, CXCL1, IRAK3, FOS, COMT, PTGS2, THBD, CASP8, CD6, PELI1, PLCG2, JAK2, TRIB1, TLR4, TLR2	776	164	16792	2.50698	0.821588	0.249831
GOTERM_BP_DIRECT	GO:0016567~protein ubiquitination	32	3.86941	0.000627686	RNF34, RNF38, PELI2, NLRC4, CBL, CDC42, RABGEF1, VCPIP1, TRIM24, ARIH1, ZYG11B, MYLIP, ZBTB16, NSMCE1, KLHL2, NOSIP, FBXL15, FBXO11, FBXO33, PJA2, LRRC41, ZC3HC1, RNF103, TRIM39, RNF149, RFWD2, KLHL8, KBTBD2, MDM4, KBTBD7, FBXL5, NFE2L2	776	359	16792	1.92884	0.845172	0.249831
GOTERM_BP_DIRECT	GO:1902042~negative regulation of extrinsic apoptotic signaling pathway via death domain receptors	8	0.967352	0.000647487	RNF34, CASP8, PEA15, HMGB2, FADD, CFLAR, RFFL, RAF1	776	33	16792	5.24586	0.854023	0.249831
GOTERM_BP_DIRECT	GO:0006412~translation	25	3.02297	0.000672719	MRPS15, SLC25A3, RPL12, MRPL15, RPL8, RPS14, RPS17, SLC25A28, RPS19, RPL36, RPLP2, SLC25A23, SLC25A44, RPL39, RPS10, RPL19, RPS5, MRPL24, MRPL43, MRPL21, RPS25, RPS20, CPEB3, SLC25A5, SLC25A14	776	253	16792	2.13826	0.864573	0.249831
GOTERM_BP_DIRECT	GO:0098609~cell-cell adhesion	26	3.14389	0.000809433	RAB1A, DDX3X, SLC3A2, IQGAP1, ZC3HAV1, CBL, SDCBP, SLK, ATIC, KIF5B, PACSIN2, ARFIP1, PAK2, EPS15, EMD, SH3GLB1, USP8, CSNK1D, RANGAP1, GAPVD1, CKAP5, SND1, CHMP2B, NUMB, PFKP, PICALM	776	271	16792	2.07608	0.909807	0.267203
GOTERM_BP_DIRECT	GO:0002223~stimulatory C-type lectin receptor signaling pathway	14	1.69287	0.00107933	CREBBP, CHUK, ICAM2, ICAM3, BCL10, NFKBIA, PSMB7, PSMD6, CLEC4D, PSMB1, PLCG2, RAF1, CLEC4E, PAK2	776	105	16792	2.88522	0.95958	0.320669
GOTERM_BP_DIRECT	GO:0006468~protein phosphorylation	37	4.474	0.00124578	RNASEL, PRKAA1, CCNT2, GMFB, LRRK2, GMFG, STK4, PPP4R1, MAPK1, MAP3K8, JAK2, PAK2, MAP4K4, MAP3K5, MAP4K1, MAP3K2, MORC3, CHUK, DAPK2, ADAM10, IRAK3, CSNK1D, BMX, TGFBR2, SRPK1, ZAP70, SNRK, ILF3, PAN3, ADCK2, LCK, STK25, MAK, STK17B, RAF1, TRIB1, HCST	776	456	16792	1.75581	0.975363	0.336473
GOTERM_BP_DIRECT	GO:0035666~TRIF-dependent toll-like receptor signaling pathway	7	0.846433	0.00149252	TBK1, CASP8, CHUK, LY96, FADD, TANK, TLR4	776	28	16792	5.40979	0.988176	0.342067
GOTERM_BP_DIRECT	GO:0015031~protein transport	33	3.99033	0.00149676	PLEKHF2, AHCTF1, TSG101, VPS4B, SNAP23, LIN7A, SNX10, RAB22A, RAB21, RAB11FIP1, CHMP1B, VPS52, STXBP5, EPS15, SLC15A4, ARFGEF1, TSNAX, NUP210, EXOC8, VPS37C, COG2, COMMD1, SCAMP3, COPZ1, RP2, CHMP2B, EXOC6, SEC22B, RAB5A, SFT2D1, RAB7A, EXOC1, C5ORF30	776	395	16792	1.80783	0.988324	0.342067
GOTERM_BP_DIRECT	GO:0045087~innate immune response	35	4.23216	0.00162851	DDX3X, NCF2, HMGB2, LY96, BCL10, NLRC4, ZC3HAV1, TREM1, LY9, SIRPB1, TBK1, C1RL, FADD, JAK2, CD55, MAP3K5, CHUK, IRAK4, BMX, TMEM173, SRPK1, ZAP70, CLEC4D, VNN1, CD6, LCK, CAPZA2, F2RL1, PADI4, CLEC4E, CD46, S100A9, TLR4, CD244, TLR2	776	430	16792	1.76133	0.992111	0.345594
GOTERM_BP_DIRECT	GO:0010508~positive regulation of autophagy	8	0.967352	0.00213511	SH3GLB1, TMEM59, PRKAA1, TP53INP2, LRRK2, TP53INP1, PIK3CB, MEFV	776	40	16792	4.32784	0.998254	0.40269
GOTERM_BP_DIRECT	GO:0006364~rRNA processing	21	2.5393	0.00220212	RNASEL, PIH1D1, RPS5, RPL12, DDX56, CSNK1D, IMP4, RPL8, RPS14, FBL, RPS25, EMG1, RPS17, RPS19, RPL36, RPP21, RPLP2, RPS20, RPL39, RPS10, RPL19	776	214	16792	2.12347	0.998569	0.40269
GOTERM_BP_DIRECT	GO:0006622~protein targeting to lysosome	5	0.604595	0.00230418	ZFYVE16, SNX16, NCOA4, SORL1, RAB7A	776	13	16792	8.32276	0.998944	0.40269
GOTERM_BP_DIRECT	GO:0006915~apoptotic process	42	5.0786	0.00305984	PPP1R15A, RTN3, RNF34, RALB, PTEN, CIB1, BCL10, NLRC4, STK4, LITAF, HINT2, CASP8, SLK, TP53INP1, PEA15, MAPK1, MAP3K8, KIF1B, FADD, JAK2, RFFL, PAK2, SH3GLB1, MAP2K4, ZBTB16, CARD8, DAPK2, RASSF7, NME3, CFLAR, TMEM173, TGFBR2, NFKBIA, TRIM39, RRAGC, TMBIM4, STK17B, DDIT3, PDCD2, RAF1, S100A9, TLR2	776	567	16792	1.6029	0.999889	0.452408
GOTERM_BP_DIRECT	GO:0007032~endosome organization	7	0.846433	0.00306884	USP8, EXOC8, TMEM127, CHMP2B, STX6, SNX10, RAB22A	776	32	16792	4.73357	0.999892	0.452408
GOTERM_BP_DIRECT	GO:0016032~viral process	26	3.14389	0.00313032	CX3CR1, RTN3, CALCOCO2, HDAC1, PSMB7, NUP62, PSMB1, MAPK1, PAK2, PDZD8, MAP3K5, MORC3, CREBBP, CD93, NUP210, NUP153, CFLAR, SND1, SRPK1, UCKL1, NUP93, NFKBIA, KARS, BIN1, LCK, SLC25A5	776	299	16792	1.88167	0.99991	0.452408
GOTERM_BP_DIRECT	GO:0043123~positive regulation of I-kappaB kinase/NF-kappaB signaling	17	2.05562	0.00319777	CHUK, SLC20A1, PELI2, CFLAR, BCL10, ZC3HAV1, IRAK4, LITAF, ZDHHC17, TMEM101, CASP8, TBK1, MIER1, NUP62, PELI1, F2RL1, FADD	776	161	16792	2.28488	0.999926	0.452408
GOTERM_BP_DIRECT	GO:0050702~interleukin-1 beta secretion	4	0.483676	0.00460613	ABCA1, F2RL1, NLRC4, TLR4	776	8	16792	10.8196	0.999999	0.580988
GOTERM_BP_DIRECT	GO:0042981~regulation of apoptotic process	20	2.41838	0.0046764	CREBBP, DUSP1, CARD8, DAPK2, ACTN1, NME3, CFLAR, BCL10, NLRC4, CASP8, SLK, BCL6, TP53INP1, PEA15, TRIM24, FADD, CALR, JAK2, RAF1, MCL1	776	213	16792	2.03185	0.999999	0.580988
GOTERM_BP_DIRECT	GO:0031647~regulation of protein stability	10	1.20919	0.00473632	CDC42, SH3GLB1, RNF149, USP4, USP3, LAMP2, PTEN, TRIM24, MAPK1, VPS35	776	70	16792	3.09131	0.999999	0.580988
GOTERM_BP_DIRECT	GO:0071902~positive regulation of protein serine/threonine kinase activity	7	0.846433	0.00488882	RALB, CAB39, ACSL1, PIH1D1, CIB1, CALM3, STK4	776	35	16792	4.32784	1	0.580988
GOTERM_BP_DIRECT	GO:0007596~blood coagulation	18	2.17654	0.00511107	VKORC1, H3F3B, HDAC1, JMJD1C, RAB27A, HPS6, PHF21A, F5, CDC42, DOCK11, THBD, PRKAR1A, GNAQ, CAPZA2, F2RL1, CD59, JAK2, RAB5A	776	184	16792	2.11688	1	0.584038
GOTERM_BP_DIRECT	GO:0061621~canonical glycolysis	6	0.725514	0.00605949	PFKFB2, GPI, PFKFB4, PFKFB3, HK2, PFKP	776	26	16792	4.99366	1	0.612672
GOTERM_BP_DIRECT	GO:0046777~protein autophosphorylation	17	2.05562	0.0060784	MAP4K1, SMG1, DAPK2, LRRK2, IRAK3, STK4, BMX, CLK4, IGF1R, EEF2K, SLK, STK25, STK17B, MAK, TRIM24, JAK2, PAK2	776	172	16792	2.13876	1	0.612672
GOTERM_BP_DIRECT	GO:0006928~movement of cell or subcellular component	11	1.33011	0.00616266	GNA13, MYLIP, VNN1, VNN2, ARPC2, ARHGDIB, CAPZA2, ARPC5, TXN, JAK2, PTGS2	776	86	16792	2.7678	1	0.612672
GOTERM_BP_DIRECT	GO:2001271~negative regulation of cysteine-type endopeptidase activity involved in execution phase of apoptosis	3	0.362757	0.00618652	RNF34, RFFL, PAK2	776	3	16792	21.6392	1	0.612672
GOTERM_BP_DIRECT	GO:0032728~positive regulation of interferon-beta production	6	0.725514	0.00715943	TBK1, DDX3X, HMGB2, ZC3HAV1, TLR4, TLR2	776	27	16792	4.80871	1	0.686151
GOTERM_BP_DIRECT	GO:1903206~negative regulation of hydrogen peroxide-induced cell death	4	0.483676	0.00920983	NUP93, LRRK2, TXN, NFE2L2	776	10	16792	8.65567	1	0.850612
GOTERM_BP_DIRECT	GO:0008654~phospholipid biosynthetic process	7	0.846433	0.00951691	SH3GLB1, PTDSS1, LPGAT1, MBOAT1, SERINC1, ABHD5, PISD	776	40	16792	3.78686	1	0.850612
GOTERM_BP_DIRECT	GO:0000028~ribosomal small subunit assembly	5	0.604595	0.0100207	RPS14, RPS17, RPS19, RPS5, RPS10	776	19	16792	5.69452	1	0.850612
GOTERM_BP_DIRECT	GO:0006892~post-Golgi vesicle-mediated transport	5	0.604595	0.0100207	RP2, SNAP23, MYO5A, SORL1, SCAMP3	776	19	16792	5.69452	1	0.850612
GOTERM_BP_DIRECT	GO:0016197~endosomal transport	9	1.08827	0.0107149	ABCA1, TSG101, ZFYVE16, SNX27, VPS4B, CHMP2B, VPS37C, STAM2, PICALM	776	66	16792	2.9508	1	0.884275
GOTERM_BP_DIRECT	GO:0043085~positive regulation of catalytic activity	10	1.20919	0.012161	APH1B, GMFB, GMFG, ALOX5AP, CIB1, CXCL1, RICTOR, CFLAR, AZIN1, NSMAF	776	81	16792	2.6715	1	0.961921
GOTERM_BP_DIRECT	GO:0007165~signal transduction	71	8.58525	0.0126587	GMFB, PDE3B, IRS2, CXCL1, PIK3CB, LITAF, SIRPB1, ARHGAP4, IGF1R, THBD, TMEM101, HINT1, PPP4R1, PPFIA1, OSTF1, JAK2, KIFAP3, MAP2K4, RALBP1, IFNGR1, CSNK1D, IRAK4, RANGAP1, GAPVD1, TEX2, ZDHHC17, SIGIRR, ZFYVE16, ZNF516, LTB, RAF1, S100A9, TLR2, SKAP2, NSMAF, PRKAA1, RALB, SLC20A1, PEX11B, ARHGAP19, ARHGAP17, IQGAP1, TXN, STK4, LILRA2, ARHGAP15, HIF1A, TANK, GNA13, SNX27, MIER1, MAPK1, FADD, PAK2,…	776	1161	16792	1.32333	1	0.961921
GOTERM_BP_DIRECT	GO:0018105~peptidyl-serine phosphorylation	13	1.57195	0.0128601	MAP4K1, SMG1, MORC3, CAB39, LRRK2, CSNK1D, STK4, TGFBR2, TBK1, PDK3, MAPK1, RICTOR, PAK2	776	125	16792	2.25047	1	0.961921
GOTERM_BP_DIRECT	GO:0036258~multivesicular body assembly	6	0.725514	0.0129508	TSG101, VPS4B, CHMP1B, CHMP2B, VPS37C, STAM2	776	31	16792	4.18823	1	0.961921
GOTERM_BP_DIRECT	GO:0006887~exocytosis	10	1.20919	0.0141327	ARFGEF1, SCRN1, VPS52, RAB27A, MYO5A, LIN7A, STXBP5, SEC22B, SYTL3, EXOC1	776	83	16792	2.60713	1	0.989741
GOTERM_BP_DIRECT	GO:0045893~positive regulation of transcription, DNA-templated	36	4.35308	0.0144033	HDAC1, HMGB2, BCL10, RLF, HIF1A, ING1, TP53INP2, NUP62, TP53INP1, GPBP1, CREB3L2, TRIM24, MAPK1, E2F3, GPBP1L1, NCOA1, MAP3K2, CREBBP, ZBTB16, ZNF281, NCOA4, EDF1, FOS, FOXN2, ILF2, RUNX2, TOPORS, PIAS1, ILF3, ELF2, DDIT3, ZNF516, WAC, ATF5, PICALM, CREB5	776	515	16792	1.51264	1	0.989741
GOTERM_BP_DIRECT	GO:1900026~positive regulation of substrate adhesion-dependent cell spreading	6	0.725514	0.0147808	CDC42, DOCK5, ARPC2, MYADM, CIB1, CALR	776	32	16792	4.05735	1	0.989741
GOTERM_BP_DIRECT	GO:0031663~lipopolysaccharide-mediated signaling pathway	6	0.725514	0.0147808	NFKBIA, CD6, MAPK1, LY96, TLR4, TLR2	776	32	16792	4.05735	1	0.989741
GOTERM_BP_DIRECT	GO:0023014~signal transduction by protein phosphorylation	7	0.846433	0.014991	SLK, CAB39, STK25, STK4, PAK2, TGFBR2, MAP4K4	776	44	16792	3.4426	1	0.989741
GOTERM_BP_DIRECT	GO:0070301~cellular response to hydrogen peroxide	8	0.967352	0.0154361	PRKAA1, IL18RAP, ARG1, APEX1, AKR1B1, CYP1B1, MAP3K5, NFE2L2	776	57	16792	3.03708	1	0.996968
GOTERM_BP_DIRECT	GO:0016579~protein deubiquitination	11	1.33011	0.0159443	USP24, USP36, USP8, USP15, USP32, USP10, USP9X, USP4, USP3, WDR20, STAMBP	776	99	16792	2.40435	1	1
GOTERM_BP_DIRECT	GO:0070125~mitochondrial translational elongation	10	1.20919	0.016331	TSFM, MRPS15, MRPS27, MRPL15, MRPL24, MRPL46, MRPL43, MRPL21, MRPL54, TUFM	776	85	16792	2.54579	1	1
GOTERM_BP_DIRECT	GO:0039702~viral budding via host ESCRT complex	5	0.604595	0.0169536	TSG101, VPS4B, CHMP1B, CHMP2B, VPS37C	776	22	16792	4.91799	1	1
GOTERM_BP_DIRECT	GO:0006906~vesicle fusion	8	0.967352	0.0184127	VAV3, STX12, STX7, STX6, GNAI3, LRMP, STX3, SYTL3	776	59	16792	2.93413	1	1
GOTERM_BP_DIRECT	GO:0006003~fructose 2,6-bisphosphate metabolic process	3	0.362757	0.0193825	PFKFB2, PFKFB4, PFKFB3	776	5	16792	12.9835	1	1
GOTERM_BP_DIRECT	GO:0046835~carbohydrate phosphorylation	5	0.604595	0.0197912	PFKFB2, GNPTG, PFKFB4, PFKFB3, HK2	776	23	16792	4.70417	1	1
GOTERM_BP_DIRECT	GO:0060334~regulation of interferon-gamma-mediated signaling pathway	4	0.483676	0.0197972	IFNGR1, IFNGR2, JAK2, PIAS1	776	13	16792	6.65821	1	1
GOTERM_BP_DIRECT	GO:0051770~positive regulation of nitric-oxide synthase biosynthetic process	4	0.483676	0.0197972	MAP2K4, JAK2, TLR4, TLR2	776	13	16792	6.65821	1	1
GOTERM_BP_DIRECT	GO:0007264~small GTPase mediated signal transduction	20	2.41838	0.019938	VAV3, DOCK5, RAB1A, RALBP1, LRRK2, RAB27A, RAB22A, RAB21, RAB32, CDC42, DOCK11, RIT1, RAB31, RHOT1, RASGEF1A, RRAGC, RAB5A, SOS2, REM2, RAB7A	776	246	16792	1.75928	1	1
GOTERM_BP_DIRECT	GO:0051056~regulation of small GTPase mediated signal transduction	13	1.57195	0.0212194	VAV3, RALBP1, ARHGAP19, ARHGAP17, SIPA1L2, ARHGAP15, ARHGAP25, ARHGAP24, ARHGAP4, CDC42, RHOT1, ARHGDIB, SOS2	776	134	16792	2.09932	1	1
GOTERM_BP_DIRECT	GO:0051603~proteolysis involved in cellular protein catabolic process	7	0.846433	0.022337	DNAJC3, PSMB7, CASP8, PSMB1, LONP1, CTSS, CLPX	776	48	16792	3.15571	1	1
GOTERM_BP_DIRECT	GO:0042059~negative regulation of epidermal growth factor receptor signaling pathway	6	0.725514	0.0238076	CDC42, TSG101, NUP62, CBL, EPS15, STAM2	776	36	16792	3.60653	1	1
GOTERM_BP_DIRECT	GO:0006807~nitrogen compound metabolic process	4	0.483676	0.0243486	VNN1, VNN2, VNN3, TIPARP	776	14	16792	6.18262	1	1
GOTERM_BP_DIRECT	GO:0006413~translational initiation	13	1.57195	0.0247462	RPS5, RPL12, RPL8, RPS14, RPS25, RPS17, RPS19, RPL36, RPLP2, RPS20, RPL39, RPS10, RPL19	776	137	16792	2.05335	1	1
GOTERM_BP_DIRECT	GO:0006897~endocytosis	13	1.57195	0.0273246	RAB1A, RALBP1, LRRK2, CSNK1D, SNX10, GAPVD1, RAB22A, CDC42, RABGEF1, BIN1, RAB5A, RAB7A, PICALM	776	139	16792	2.02381	1	1
GOTERM_BP_DIRECT	GO:0090382~phagosome maturation	3	0.362757	0.0281919	RAB32, RAB31, RAB7A	776	6	16792	10.8196	1	1
GOTERM_BP_DIRECT	GO:0048524~positive regulation of viral process	3	0.362757	0.0281919	TSG101, VPS4B, RAB7A	776	6	16792	10.8196	1	1
GOTERM_BP_DIRECT	GO:0008285~negative regulation of cell proliferation	28	3.38573	0.0283013	TSG101, BTG1, HDAC1, PTEN, CIB1, CXCL1, STK4, PPM1D, PTGS2, RBPJ, ING1, TMEM127, FTH1, NUP62, TP53INP1, TRIM24, CYP1B1, WDR6, JAK2, KIFAP3, CCL23, ZBTB16, BCL6, MDM4, RAF1, ATF5, SKAP2, TLR2	776	396	16792	1.53004	1	1
GOTERM_BP_DIRECT	GO:1903543~positive regulation of exosomal secretion	4	0.483676	0.0294141	SDCBP, TSG101, VPS4B, RAB7A	776	15	16792	5.77045	1	1
GOTERM_BP_DIRECT	GO:0006997~nucleus organization	5	0.604595	0.0299787	H3F3B, BIN1, VPS4B, CHMP1B, CHMP2B	776	26	16792	4.16138	1	1
GOTERM_BP_DIRECT	GO:0006979~response to oxidative stress	11	1.33011	0.0307267	MSRA, BTG1, NDUFS8, VNN1, RRM2B, GPX4, DUSP1, STK25, GPX3, LRRK2, PTGS2	776	110	16792	2.16392	1	1
GOTERM_BP_DIRECT	GO:0006470~protein dephosphorylation	12	1.45103	0.0313867	DUSP11, PTPRE, PPP4R1, UBLCP1, LCK, PPP1R3B, PPP1R3D, PTEN, PDXP, PTPN12, SSH2, PPM1D	776	126	16792	2.06087	1	1
GOTERM_BP_DIRECT	GO:0006091~generation of precursor metabolites and energy	7	0.846433	0.0344984	ATP5B, SLC25A3, CYB5R4, ACOX1, GBE1, ACO2, COX7C	776	53	16792	2.858	1	1
GOTERM_BP_DIRECT	GO:0042274~ribosomal small subunit biogenesis	4	0.483676	0.0349901	EMG1, RPS17, RPS19, NAT10	776	16	16792	5.40979	1	1
GOTERM_BP_DIRECT	GO:0035994~response to muscle stretch	4	0.483676	0.0349901	NFKBIA, GPI, FOS, RAF1	776	16	16792	5.40979	1	1
GOTERM_BP_DIRECT	GO:0038095~Fc-epsilon receptor signaling pathway	15	1.81378	0.0364288	VAV3, MAP2K4, CHUK, PIK3CB, FOS, BCL10, GAB2, NFKBIA, PSMB7, PSMD6, PSMB1, PLCG2, MAPK1, CALM3, PAK2	776	178	16792	1.82353	1	1
GOTERM_BP_DIRECT	GO:0043388~positive regulation of DNA binding	5	0.604595	0.0382066	HMGB2, EDF1, CALM3, TXN, JAK2	776	28	16792	3.86414	1	1
GOTERM_BP_DIRECT	GO:0070417~cellular response to cold	3	0.362757	0.0382764	NFKBIA, DNAJC3, RNF34	776	7	16792	9.27393	1	1
GOTERM_BP_DIRECT	GO:0000389~mRNA 3'-splice site recognition	3	0.362757	0.0382764	SF3A1, SF3A2, SLU7	776	7	16792	9.27393	1	1
GOTERM_BP_DIRECT	GO:1900016~negative regulation of cytokine production involved in inflammatory response	3	0.362757	0.0382764	IL1R2, MEFV, C5ORF30	776	7	16792	9.27393	1	1
GOTERM_BP_DIRECT	GO:0043065~positive regulation of apoptotic process	22	2.66022	0.0385624	NCOA1, VAV3, DDX3X, DUSP1, ZBTB16, NLRC4, STK4, PTGS2, IGF2R, ARHGAP4, APH1B, BCL6, BIN1, CYP1B1, SAP18, RNPS1, MNDA, PDCD2, FADD, SOS2, NSMAF, MAP3K5	776	300	16792	1.58687	1	1
GOTERM_BP_DIRECT	GO:0000045~autophagosome assembly	6	0.725514	0.0392646	RAB1A, STX12, GABARAPL1, TP53INP2, RB1CC1, TP53INP1	776	41	16792	3.16671	1	1
GOTERM_BP_DIRECT	GO:0030168~platelet activation	11	1.33011	0.0399189	GNA13, VAV3, GNG2, LCK, ACTN1, GNAQ, PLCG2, MAPK1, PIK3CB, RAF1, F5	776	115	16792	2.06983	1	1
GOTERM_BP_DIRECT	GO:1902041~regulation of extrinsic apoptotic signaling pathway via death domain receptors	4	0.483676	0.0410693	CASP8, TMC8, FADD, CFLAR	776	17	16792	5.09157	1	1
GOTERM_BP_DIRECT	GO:0006406~mRNA export from nucleus	10	1.20919	0.0413546	NUP93, SMG1, ALKBH5, CPSF1, NUP210, NUP62, NUP153, RNPS1, CASC3, SLU7	776	100	16792	2.16392	1	1
GOTERM_BP_DIRECT	GO:0050852~T cell receptor signaling pathway	13	1.57195	0.0413724	CHUK, PTEN, PIK3CB, BCL10, NFKBIA, ZAP70, PSMB7, PSMD6, LCK, PSMB1, PLCG2, MAPK1, PAK2	776	148	16792	1.90074	1	1
GOTERM_BP_DIRECT	GO:0006511~ubiquitin-dependent protein catabolic process	15	1.81378	0.0426485	USP24, USP36, USP8, USP15, USP10, USP9X, USP4, USP32, USP3, UBE2G2, FBXO11, TOPORS, TP53INP2, ARIH1, RFFL	776	182	16792	1.78345	1	1
GOTERM_BP_DIRECT	GO:0016925~protein sumoylation	11	1.33011	0.0440743	SENP6, NUP93, STAG2, NUP210, RING1, NUP62, NSMCE1, NUP153, RANGAP1, TOPORS, PIAS1	776	117	16792	2.03445	1	1
GOTERM_BP_DIRECT	GO:0071260~cellular response to mechanical stimulus	8	0.967352	0.0449412	MAP3K2, MAP2K4, CASP8, BCL10, FADD, ATP1A1, PTGS2, TLR4	776	71	16792	2.43822	1	1
GOTERM_BP_DIRECT	GO:0006886~intracellular protein transport	18	2.17654	0.046952	STX12, STX7, SNX13, COPZ1, SYTL3, RPGR, SNX27, AP1G1, RUNDC1, STX6, TBC1D14, ARFIP1, VPS35, STX3, EVI5L, SLU7, STAM2, TBC1D15	776	236	16792	1.65045	1	1
GOTERM_BP_DIRECT	GO:0001574~ganglioside biosynthetic process	4	0.483676	0.047642	ST6GALNAC2, ST8SIA4, ST3GAL5, ST3GAL6	776	18	16792	4.80871	1	1
GOTERM_BP_DIRECT	GO:0006414~translational elongation	4	0.483676	0.047642	TSFM, EEF2K, RPLP2, TUFM	776	18	16792	4.80871	1	1
GOTERM_BP_DIRECT	GO:0043161~proteasome-mediated ubiquitin-dependent protein catabolic process	16	1.9347	0.0493601	RNF34, RNF38, RAD23B, TOPORS, NSFL1C, UBE2W, PSMB7, PSMD6, C18ORF25, DDIT3, PSMB1, ANAPC5, RFFL, KCTD17, RNF122, NFE2L2	776	203	16792	1.70555	1	1
GOTERM_BP_DIRECT	GO:0015939~pantothenate metabolic process	3	0.362757	0.0494999	VNN1, VNN2, VNN3	776	8	16792	8.11469	1	1
GOTERM_BP_DIRECT	GO:0071550~death-inducing signaling complex assembly	3	0.362757	0.0494999	CASP8, FADD, RAF1	776	8	16792	8.11469	1	1
GOTERM_CC_DIRECT	GO:0000922~spindle pole	10	1.20919	0.0481012	VPS4B, NUP62, LRMP, CALM3, TOPBP1, CEP63, RANGAP1, CKAP5, TOPORS, MAD1L1	794	109	18224	2.1057	1	0.450258
GOTERM_CC_DIRECT	GO:0005789~endoplasmic reticulum membrane	49	5.92503	0.0468428	DPAGT1, LPGAT1, RNF13, XYLT2, LRMP, ANTXR2, SPTLC2, CREB3L2, CYP1B1, VKORC1, NUP210, ACSL1, IFNGR2, TMC8, ALG3, TMC6, TMEM173, PJA2, COPZ1, PIGB, SEC22B, ERGIC1, FKBP5, PPP1R15A, RTN3, RAB1A, TGFA, PTGS2, ZMPSTE24, RAB21, CDC42, SDCBP, PTDSS1, CYB5R4, LRRC8D, CD59, UBQLN4, ABCA1, MBTPS1, ATP13A1, CYP4F3, MBOAT1, ERLIN1, DHRS3, G6PC3, RNF103, ALOX5AP, SERINC1, CDS2	794	862	18224	1.3047	1	0.445787
GOTERM_CC_DIRECT	GO:0042645~mitochondrial nucleoid	6	0.725514	0.0448236	ATP5B, SHMT2, LONP1, SLC25A5, CLPX, TUFM	794	45	18224	3.06029	1	0.433802
GOTERM_CC_DIRECT	GO:0032839~dendrite cytoplasm	4	0.483676	0.0411274	MAP2K4, GABARAPL1, LRRK2, MAPK1	794	18	18224	5.10048	1	0.404892
GOTERM_CC_DIRECT	GO:0000785~chromatin	9	1.08827	0.0398073	MBD4, AHCTF1, STAG2, MCM7, HDAC1, CBX1, JMJD1C, UBR2, NFE2L2	794	89	18224	2.321	1	0.398771
GOTERM_CC_DIRECT	GO:0005637~nuclear inner membrane	6	0.725514	0.0378765	RNF13, ATP11B, LEMD3, EMD, TOR1AIP1, ZMPSTE24	794	43	18224	3.20262	1	0.386205
GOTERM_CC_DIRECT	GO:0005643~nuclear pore	8	0.967352	0.0367417	NUP93, AHCTF1, MCM3AP, NUP210, NUP62, NUP153, RANGAP1, MAD1L1	794	72	18224	2.55024	1	0.381446
GOTERM_CC_DIRECT	GO:0031143~pseudopodium	4	0.483676	0.0353863	ACTN1, F2RL1, MAPK1, RAF1	794	17	18224	5.4005	1	0.374178
GOTERM_CC_DIRECT	GO:0097342~ripoptosome	3	0.362757	0.0343293	CASP8, FADD, CFLAR	794	7	18224	9.83663	1	0.36985
GOTERM_CC_DIRECT	GO:0031264~death-inducing signaling complex	3	0.362757	0.0343293	CASP8, FADD, CFLAR	794	7	18224	9.83663	1	0.36985
GOTERM_CC_DIRECT	GO:0005634~nucleus	261	31.5599	0.0298827	JMJD1C, RBPJ, ALKBH6, UXT, HERC4, ALKBH5, PPP4R2, FTH1, GPBP1, CREB3L2, TRIM24, LONP1, DIP2B, PIH1D1, ZNF281, IFRD1, NSMCE1, RFX2, DNTTIP1, CSNK1D, RUNX2, SND1, PISD, THAP1, RRAGC, KARS, DDIT3, HECW2, MT1F, FAM76B, PADI4, ATF5, TRIB1, BLZF1, TSHZ3, SHMT2, MYNN, ZNF20, TGFA, IQGAP1, TXN, BCL10, BAZ2B, ZC3HAV1, MEFV, HIF1A, SAMSN1, ATP5B, ZSCAN16, DECR1, CREBBP, H3F3B, TIPARP, RCC2, PBX2, BTBD10, S…	794	5415	18224	1.10628	1	0.334569
GOTERM_CC_DIRECT	GO:0031201~SNARE complex	7	0.846433	0.0269137	STX12, STX7, SNAP23, STX6, STXBP5, STX3, SEC22B	794	53	18224	3.03141	1	0.307354
GOTERM_CC_DIRECT	GO:0046696~lipopolysaccharide receptor complex	3	0.362757	0.0252405	LY96, BCL10, TLR4	794	6	18224	11.4761	1	0.29413
GOTERM_CC_DIRECT	GO:0031265~CD95 death-inducing signaling complex	3	0.362757	0.0252405	CASP8, FADD, CFLAR	794	6	18224	11.4761	1	0.29413
GOTERM_CC_DIRECT	GO:0005681~spliceosomal complex	10	1.20919	0.0211107	IVNS1ABP, SF3A1, SF3A2, SNRPD2, WBP4, WAC, PPIH, SNRPF, SLU7, SNRPA	794	94	18224	2.44172	0.999995	0.256472
GOTERM_CC_DIRECT	GO:0005764~lysosome	18	2.17654	0.0203067	USP4, CCDC115, LRRK2, STX7, MYO5A, RAB27A, GIMAP5, BCL10, ZC3HAV1, CTSS, TMEM59, DPP7, SNX16, RRAGC, LAMP2, CHMP2B, RFFL, RAB7A	794	226	18224	1.82805	0.999992	0.252068
GOTERM_CC_DIRECT	GO:0005768~endosome	18	2.17654	0.0195389	STEAP4, TSG101, CCDC115, VPS4B, LRRK2, STX7, SLA, ATP1A1, GAPVD1, SORL1, IGF2R, RAB21, SNX27, ARPC2, CHMP2B, VPS35, RAB11FIP2, RAB5A	794	225	18224	1.83617	0.999987	0.247927
GOTERM_CC_DIRECT	GO:0000118~histone deacetylase complex	6	0.725514	0.0189824	HINT1, HDAC1, DNTTIP1, ZNF217, SAP18, PHF21A	794	36	18224	3.82536	0.999982	0.24634
GOTERM_CC_DIRECT	GO:0031313~extrinsic component of endosome membrane	3	0.362757	0.0173228	USP8, SNX16, SNX10	794	5	18224	13.7713	0.999954	0.23003
GOTERM_CC_DIRECT	GO:0005765~lysosomal membrane	21	2.5393	0.0169569	TMEM55A, ATP6V1A, SLC36A1, RNF13, STX7, GNAI3, HPS6, TM6SF1, LITAF, IGF2R, TMEM59, HLA-DMA, OSTM1, AP1G1, GNAQ, LAMP2, ATP6V1B2, VPS35, DIRC2, SLC15A4, RAB7A	794	274	18224	1.75911	0.999943	0.23003
GOTERM_CC_DIRECT	GO:0015629~actin cytoskeleton	18	2.17654	0.0147737	IVNS1ABP, SVIL, PDXP, KLHL2, ARPC5, IQGAP1, RAB22A, MSRA, MARCKS, STAG2, ARPC2, BIN1, STK17B, CAPZA2, LCP1, TOPBP1, RAB5A, MAD1L1	794	218	18224	1.89513	0.999796	0.205751
GOTERM_CC_DIRECT	GO:0030670~phagocytic vesicle membrane	8	0.967352	0.0137392	RAB32, RAB31, RAB11FIP1, LAMP2, RAB5A, RAB22A, RAB7A, TLR2	794	59	18224	3.11215	0.999629	0.196126
GOTERM_CC_DIRECT	GO:0005795~Golgi stack	6	0.725514	0.0132922	MBTPS1, NSFL1C, VCPIP1, TMBIM4, COG2, GOLGA7	794	33	18224	4.17312	0.99952	0.194611
GOTERM_CC_DIRECT	GO:0016605~PML body	11	1.33011	0.0102182	RPAIN, MORC3, ZMYM2, ZBTB16, TP53INP2, TP53INP1, PTEN, TOPBP1, TOPORS, THAP1, PIAS1	794	98	18224	2.57626	0.997162	0.153542
GOTERM_CC_DIRECT	GO:0031982~vesicle	13	1.57195	0.00999116	STX12, IFNGR1, STX7, MYO5A, CIB1, RABGEF1, MYL6, DPP7, BASP1, KIF5B, CD59, CALM3, PICALM	794	128	18224	2.33108	0.996765	0.153542
GOTERM_CC_DIRECT	GO:0000145~exocyst	5	0.604595	0.00987379	RALB, EXOC8, VPS52, EXOC6, EXOC1	794	20	18224	5.73804	0.996538	0.153542
GOTERM_CC_DIRECT	GO:0055037~recycling endosome	12	1.45103	0.00841287	RABGEF1, RAB11FIP1, SLC31A2, AP1G1, STX7, VPS52, MYO5A, TBC1D14, ATP11B, COMMD1, LDLRAP1, SORL1	794	110	18224	2.50387	0.991966	0.13725
GOTERM_CC_DIRECT	GO:0010008~endosome membrane	17	2.05562	0.007019	STX12, TSG101, VPS4B, VPS37C, LY96, COMMD1, IRAK4, ANTXR2, RAB22A, TBK1, CHMP1B, VPS52, VPS35, RFFL, RAB5A, TLR4, RAB7A	794	185	18224	2.10912	0.982083	0.117878
GOTERM_CC_DIRECT	GO:0005776~autophagosome	9	1.08827	0.00636934	GABARAPL1, RALB, CALCOCO2, TP53INP2, TP53INP1, TBC1D14, NRBF2, MEFV, UBQLN4	794	64	18224	3.22764	0.97397	0.110209
GOTERM_CC_DIRECT	GO:0030532~small nuclear ribonucleoprotein complex	5	0.604595	0.00537903	ARFGEF1, SF3A2, SNRPD2, SNRPF, SLU7	794	17	18224	6.75063	0.954028	0.095982
GOTERM_CC_DIRECT	GO:0030426~growth cone	13	1.57195	0.00463083	TSHZ3, EXOC8, USP9X, LRRK2, MYO5A, CIB1, IQGAP1, CBL, GDPD5, ARHGAP4, BASP1, CALM3, STX3	794	116	18224	2.57222	0.929373	0.085297
GOTERM_CC_DIRECT	GO:0022627~cytosolic small ribosomal subunit	8	0.967352	0.00446714	RPS14, RPS25, RPS17, DDX3X, RPS19, RPS5, RPS20, RPS10	794	48	18224	3.82536	0.922421	0.0850247
GOTERM_CC_DIRECT	GO:0045121~membrane raft	19	2.29746	0.00396111	ABCA1, STX12, GNAI3, ARID3A, CFLAR, BCL10, IQGAP1, CBL, TGFBR2, ZAP70, SDCBP, CASP8, LCK, MYADM, FADD, JAK2, RAB5A, CD55, TLR2	794	206	18224	2.11695	0.896304	0.077993
GOTERM_CC_DIRECT	GO:0044754~autolysosome	4	0.483676	0.0038998	LRRK2, FTH1, LAMP2, NCOA4	794	8	18224	11.4761	0.892594	0.077993
GOTERM_CC_DIRECT	GO:0001772~immunological synapse	7	0.846433	0.00315403	ZAP70, SNX27, CD6, PRKAR1A, LCK, STX7, BCL10	794	34	18224	4.72544	0.835328	0.0667019
GOTERM_CC_DIRECT	GO:0043209~myelin sheath	16	1.9347	0.00262337	ATP6V1A, GPI, SLC25A3, PDHA1, MDH2, GOT2, ATP1A1, COX5A, TUFM, CDC42, ATP5B, TUBA1B, ATP6V1B2, TSPAN2, ACO2, SLC25A5	794	152	18224	2.41601	0.776851	0.0576133
GOTERM_CC_DIRECT	GO:0031965~nuclear membrane	21	2.5393	0.00248282	MRPS15, AHCTF1, NUP210, TMC8, HN1, NUP153, TMC6, APEH, RANGAP1, ZC3HC1, NUP93, MCM3AP, SCRN1, GNAQ, RB1CC1, ALOX5AP, NUP62, FAM76B, LBR, EMD, TNPO3	794	229	18224	2.10478	0.758153	0.0567075
GOTERM_CC_DIRECT	GO:0005913~cell-cell adherens junction	27	3.26481	0.00198265	RAB1A, DDX3X, SLC3A2, IQGAP1, ZC3HAV1, CBL, SDCBP, SLK, ATIC, KIF5B, PACSIN2, ARFIP1, PAK2, EPS15, EMD, SH3GLB1, USP8, CSNK1D, RANGAP1, GAPVD1, CKAP5, SND1, CHMP2B, NUMB, PFKP, DSC2, PICALM	794	323	18224	1.9186	0.678004	0.0471705
GOTERM_CC_DIRECT	GO:0001726~ruffle	12	1.45103	0.00179048	MKLN1, ACTN1, ATP6V1B2, MYADM, MYO5A, KLHL2, LCP1, IQGAP1, MEFV, SAMSN1, RAB5A, RAB22A	794	90	18224	3.06029	0.640586	0.0444506
GOTERM_CC_DIRECT	GO:0005730~nucleolus	57	6.89238	0.00158387	RPAIN, USP36, SLC25A3, NCF2, HMGB2, NAT10, PIK3CB, RBPJ, RPL8, PHTF1, FBL, RPS14, RGS2, HINT2, RPS19, RPL36, NUDT16, RPS10, DDX18, RBM14, IK, PIH1D1, DDX56, DNTTIP1, EDF1, IMP4, ILF2, MIF4GD, FBXO11, ETV6, THAP1, ILF3, ACOX1, SNRPA, ZNF593, TSG101, RPL12, RBM4B, EMG1, POLR2F, POLR2I, RPL19, ARFGEF1, ZBTB16, RCC2, CRIPT, ARID3A, HN1, NUP153, SRP68, SSRP1, BTBD10, RPS25, STAG2, UBLCP1, APEX1, CUTC	794	857	18224	1.52657	0.595501	0.0411086
GOTERM_CC_DIRECT	GO:0031902~late endosome membrane	13	1.57195	0.00144752	OSBPL9, TMEM55A, TSG101, RNF13, VPS4B, VPS37C, TMEM59, HLA-DMA, SNX16, CHMP1B, LAMP2, CHMP2B, RAB7A	794	101	18224	2.95424	0.562698	0.0393586
GOTERM_CC_DIRECT	GO:0042470~melanosome	13	1.57195	0.00144752	RAB1A, MYO5A, RAB27A, SLC3A2, ATP1A1, SND1, RAB32, GNA13, SDCBP, ATP6V1B2, STX3, SEC22B, RAB5A	794	101	18224	2.95424	0.562698	0.0393586
GOTERM_CC_DIRECT	GO:0045335~phagocytic vesicle	8	0.967352	0.00130846	ABCA1, RAB32, STX12, RAB31, STX6, RAB5A, RAB22A, RAB7A	794	39	18224	4.70813	0.526508	0.0393227
GOTERM_CC_DIRECT	GO:0005743~mitochondrial inner membrane	35	4.23216	0.000935944	MRPS15, SLC25A3, ACAA2, SHMT2, NDUFB11, LRRK2, NDUFB3, MRPL15, COX7C, COX5A, MRPL54, ATP5B, SAMM50, SLC25A28, PMPCA, CYC1, SLC25A23, SLC25A44, MRPS27, MDH2, NDUFA3, ACAD9, GOT2, COQ10B, MRPL46, MRPL24, MRPL43, MRPL21, CLPX, HIGD2A, TUFM, NDUFS5, SLC25A5, SLC25A14, CDS2	794	441	18224	1.8216	0.41414	0.0296902
GOTERM_CC_DIRECT	GO:0005840~ribosome	18	2.17654	0.000935714	MRPS15, MRPS27, SRP68, RPL8, MRPL24, MRPL43, MRPL21, MRPL54, RPS14, RPS25, RPS17, RPS19, APEX1, RPL36, RPLP2, RPS20, RPS10, RPL19	794	166	18224	2.48879	0.414063	0.0296902
GOTERM_CC_DIRECT	GO:0005741~mitochondrial outer membrane	18	2.17654	0.000267661	SH3GLB1, PPP1R15A, DDX3X, MAOA, ACSL1, AGK, ARG1, LRRK2, GIMAP5, ATP5G2, TMEM173, HK2, RAB32, SNN, CASP8, SAMM50, RAF1, MCL1	794	149	18224	2.77274	0.141746	0.00955214
GOTERM_CC_DIRECT	GO:0005759~mitochondrial matrix	30	3.62757	0.000235298	RNASEL, ECHS1, SHMT2, LRRK2, HSD17B10, HSD17B8, GLS, ATP5B, ABHD10, FLAD1, LONP1, IDH3B, PDK3, PMPCA, ME2, DECR1, MCL1, NDUFA9, TSFM, PDHA1, HSPA1L, MDH2, GOT2, MTHFS, PYCR2, CLPX, SARS2, NDUFS8, KARS, ACO2	794	327	18224	2.1057	0.125734	0.00895701
GOTERM_CC_DIRECT	GO:0005794~Golgi apparatus	61	7.37606	0.000229495	ST6GALNAC2, USP32, LRRK2, PDE3B, CIB1, GCC1, LITAF, ARHGAP4, RPGR, TMEM43, AP1G1, TOPBP1, KIFAP3, SRGN, USP8, GABARAPL1, TMC8, ADAM10, ATP11B, CSNK1D, TMC6, TMEM173, ZDHHC17, TPST1, RP2, SLC9A8, RAF1, CD46, B4GALT7, RNF122, TLR2, RAB7A, PPP1R15A, RAB1A, GALT, GNAI3, ATP1A1, ZC3HAV1, DPP7, VPS52, STX6, ST3GAL5, TBC1D14, MAPK1, ST3GAL6, ABCA1, OSBPL9, ARFGEF1, TSNAX, MYO5A, RAB27A, ARID3A, SORL1, G…	794	863	18224	1.62234	0.122832	0.00895701
GOTERM_CC_DIRECT	GO:0005739~mitochondrion	86	10.399	0.000214841	PECR, SLC25A3, MRPS15, ACAA2, LRRK2, PTEN, COMT, COX7C, GLS, RPS14, ABHD10, RGS2, HINT2, CASP8, ATIC, SPTLC2, FTH1, LONP1, IDH3B, CYP1B1, PDK3, PMPCA, KIF1B, VPS35, ME2, SH3GLB1, TSFM, GABARAPL1, MRPS27, AGTPBP1, GPX4, ACSL1, ACAD9, NME3, COQ10B, MRPL46, SND1, CLPX, PISD, TUFM, RAB32, ILF3, SARS2, NDUFS8, KARS, RRM2B, ACOX1, NDUFS5, RPUSD3, SLC25A5, BCAT1, SLC25A14, ATP6V1A, PPP1R15A, ECHS1, NDUF…	794	1331	18224	1.48301	0.11546	0.00895701
GOTERM_CC_DIRECT	GO:0016607~nuclear speck	22	2.66022	0.000188674	RNF34, SF3A2, DDX3X, RING1, ZBTB16, WBP4, CASC3, HIF1A, TOPORS, PIAS1, DUSP11, ALKBH5, RFWD2, BASP1, APEX1, WAC, SAP18, PPIH, FAM76B, RNPS1, MNDA, SLU7	794	201	18224	2.51217	0.102142	0.00895701
GOTERM_CC_DIRECT	GO:0043005~neuron projection	25	3.02297	0.000110637	CX3CR1, GPI, HDAC1, LRRK2, SNAP23, PTEN, CIB1, LIN7A, IQGAP1, PTGS2, CDC42, RGS2, CASP8, KIF1B, FADD, STX3, ANKS1A, NCOA1, ARG1, MYO5A, CSNK1D, ARPC5, FOS, ARPC2, CPEB3	794	237	18224	2.42111	0.0612227	0.00574304
GOTERM_CC_DIRECT	GO:0005654~nucleoplasm	161	19.468	9.36534e-05	CCNT2, ARID4A, JMJD1C, CIB1, ARID4B, CASC3, RBPJ, FBL, RPS14, RPS17, PSMD6, RPS19, PPP4R2, SNRPD2, GPBP1, CREB3L2, LONP1, PAPOLA, SNIP1, NUDT16, CPSF3L, ANKS1A, RPS10, FNBP4, TLE4, USP8, MORC3, IK, RPS5, ZNF281, DNTTIP1, GTF3A, NSMCE1, CSNK1D, IMP4, ILF2, GTF2F2, RUNX2, CLPX, PIAS1, ILF3, DDIT3, RPP21, HIST1H2BE, PPIH, ANAPC5, PADI4, STAMBP, SNRPF, ATF5, STAM2, BLZF1, SNRPA, HIST1H2BC, SKAP2, FKB…	794	2784	18224	1.32733	0.0520737	0.00534761
GOTERM_CC_DIRECT	GO:0005925~focal adhesion	36	4.35308	4.5876e-05	RPL12, SNAP23, IQGAP1, RPL8, RAB21, CDC42, GNA13, RPS14, SDCBP, RPS17, RPS19, PPFIA1, PACSIN2, MAPK1, RPLP2, CD59, RPS10, MPZL1, RPL19, SVIL, MME, ACTN1, RPS5, ADAM10, SRP68, PTPN12, ARPC5, ARHGAP24, IGF2R, MARCKS, ARPC2, RFWD2, NUMB, LCP1, CALR, CD46	794	391	18224	2.11324	0.0258557	0.00291058
GOTERM_CC_DIRECT	GO:0043231~intracellular membrane-bounded organelle	47	5.68319	2.58185e-05	DPAGT1, PECR, CALCOCO2, AQP9, ABHD5, ATP1A1, LITAF, CTSS, IGF1R, DPP7, RAB11FIP1, ATXN1, AP1G1, NUP62, GPBP1, PACSIN2, CYP1B1, ME2, GUSB, RAB11FIP2, EPS15, TNPO3, PDHA1, CHUK, AGK, ATP13A1, USP3, STX7, NSMCE1, ADAM10, FOXN2, RANGAP1, ZDHHC17, SCAMP3, THAP1, ZFYVE16, OSTM1, NOV, RRAGC, PPP1R3B, ACOX1, PPP1R3D, ATP6V1B2, SLU7, STAM2, DCP2, RAB7A	794	558	18224	1.93324	0.0146344	0.0018428
GOTERM_CC_DIRECT	GO:0005770~late endosome	18	2.17654	2.14183e-05	TSG101, SLC31A2, EXOC8, STX7, MYO5A, RAB27A, ZC3HAV1, IGF2R, RAB22A, TMEM59, SNX16, DDIT3, LAMP2, CHMP2B, MAPK1, VPS35, ANKRD13A, RAB7A	794	122	18224	3.38638	0.0121555	0.00174712
GOTERM_CC_DIRECT	GO:0000139~Golgi membrane	50	6.04595	1.20367e-05	STEAP4, ST6GALNAC2, RNF13, XYLT2, GCC1, AP1G1, ARFIP1, SH3GLB1, SRGN, IFNGR2, COG2, ADAM10, NOSIP, CSNK1D, POMGNT1, ZDHHC17, PJA2, COPZ1, SCAMP3, F5, TPST1, TMBIM4, TRAPPC6B, SLC9A8, SEC22B, B4GALT7, ERGIC1, BLZF1, B4GALT4, B4GALT5, RTN3, RAB1A, STX12, TGFA, CDC42, MAN2A2, CHSY1, ST8SIA4, STX6, ST3GAL5, ST3GAL6, CD59, RFFL, CD55, ARFGEF1, MBTPS1, TMEM59, GNPTG, RFWD2, STK25	794	591	18224	1.94181	0.00684942	0.00114549
GOTERM_CC_DIRECT	GO:0005769~early endosome	28	3.38573	2.58554e-06	RAB1A, TSG101, USP10, SNX13, RAB22A, RABGEF1, SNX27, TMEM127, PACSIN2, STX6, MAPK1, VPS35, LDLRAP1, USP8, STX7, MYO5A, ATP11B, COMMD1, SORL1, IGF2R, RAB32, RAB31, ZFYVE16, SNX16, NUMB, F2RL1, STAMBP, RAB5A	794	229	18224	2.80638	0.00147526	0.000295269
GOTERM_CC_DIRECT	GO:0005737~cytoplasm	296	35.792	6.56806e-08	LPGAT1, GCC1, RBPJ, RPL8, ALKBH6, UXT, RPS14, HERC4, TBK1, RPS19, PPP4R2, FLAD1, FTH1, GPBP1, LONP1, RPL36, DIP2B, ANKS1A, DAPK2, ACTN1, IL1R2, PIH1D1, IFRD1, RFX2, MIF4GD, CLPX, RUNX2, SND1, ZFYVE16, RRAGC, KARS, BIN1, PRKAR1A, DDIT3, HECW2, MT1F, PADI4, ATF5, KCTD17, TRIB1, BLZF1, SKAP2, LXN, SHMT2, IQGAP1, TXN, BCL10, ZC3HAV1, MEFV, HIF1A, C12ORF57, RAB11FIP1, MIER1, STXBP5, FADD, NRBF2, DECR1…	794	5222	18224	1.301	3.75029e-05	9.3759e-06
GOTERM_CC_DIRECT	GO:0070062~extracellular exosome	185	22.37	2.71733e-09	STEAP4, ACAA2, ICAM2, ICAM3, CIB1, COMT, APEH, FBL, RPS14, RPS17, PSMD6, SLK, RPS19, SNRPD2, BASP1, FTH1, C1RL, LAMP2, ARHGDIB, SIRPA, VPS35, DIP2B, OSTF1, KIFAP3, NUDT14, RPS10, GOLGA7, SH3GLB1, RPS5, ACTN1, STX7, ADAM10, SCAMP3, SND1, TUFM, DCTD, MYL6, CRISPLD2, DAAM2, MYADM, HIST1H2BE, STAMBP, S100A9, DSC2, HIST1H2BC, FKBP5, ATP6V1A, CUTA, RTN3, TSG101, LXN, STXBP3, SHMT2, TEX264, PEX11B, LIN7…	794	2811	18224	1.51055	1.55159e-06	5.17198e-07
GOTERM_CC_DIRECT	GO:0016020~membrane	156	18.8634	4.54765e-10	DPAGT1, LPGAT1, ICAM2, XYLT2, ICAM3, CIB1, COMT, RPL8, BEST1, IGF1R, FBL, RPS14, RPS17, RPS19, KIF5B, LAMP2, ARHGDIB, RPL36, LONP1, SLC16A6, SIRPA, DIP2B, RPS10, SH3GLB1, DDX18, RALBP1, NUP210, ACSL1, RPS5, COG2, ADAM10, ATP11B, GAPVD1, LEMD3, ILF2, SND1, TUFM, SIGIRR, NUP93, RAB32, TPST1, ILF3, MYL6, BIN1, PRKAR1A, FKBP5, CUTA, PEX11B, ARHGAP15, ZMPSTE24, SDCBP, ATP5B, PTDSS1, RHOT1, CYC1, PDZD8…	794	2200	18224	1.62752	2.59671e-07	1.29835e-07
GOTERM_CC_DIRECT	GO:0005829~cytosol	240	29.0206	2.11098e-17	GCC1, RPL8, GLS, RPS14, HERC4, RPS17, PSMD6, TBK1, RPS19, SNRPD2, FLAD1, FTH1, TRIM24, RPL36, ARFIP1, VPS35, KIFAP3, RPL39, RPS10, GABARAPL1, ACTN1, COG2, CSNK1D, GAPVD1, MYL6, RRAGC, KARS, PRKAR1A, DDIT3, PADI4, DUS3L, SKAP2, STXBP3, IQGAP1, TXN, BCL10, MEFV, HIF1A, SAMSN1, RHOT1, PLCG2, FADD, RCC2, MYO5A, MTHFS, RPS25, SULT1B1, MSRA, HAL, STAG2, RPS20, RNPS1, CALM3, CALR, ITPA, GPI, SMG1, AHCTF…	794	3315	18224	1.66169	1.20537e-14	1.20537e-14
GOTERM_MF_DIRECT	GO:0003831~beta-N-acetylglucosaminylglycopeptide beta-1,4-galactosyltransferase activity	3	0.362757	0.0490274	B4GALT7, B4GALT4, B4GALT5	776	8	16881	8.1577	1	1
GOTERM_MF_DIRECT	GO:0043539~protein serine/threonine kinase activator activity	4	0.483676	0.0470204	CAB39, CALM3, IQGAP1, STK4	776	18	16881	4.83419	1	1
GOTERM_MF_DIRECT	GO:0051059~NF-kappaB binding	5	0.604595	0.0468378	NFKBIA, HDAC1, APEX1, BCL10, COMMD6	776	30	16881	3.62564	1	1
GOTERM_MF_DIRECT	GO:0036459~thiol-dependent ubiquitinyl hydrolase activity	8	0.967352	0.0411204	USP24, USP36, USP8, USP15, USP32, USP9X, USP4, USP3	776	70	16881	2.48616	1	1
GOTERM_MF_DIRECT	GO:0008022~protein C-terminus binding	15	1.81378	0.0411134	PRKAA1, CEP135, NCF2, VPS4B, ZBTB16, SCLT1, CIB1, BCL10, MIF4GD, PIAS1, SDCBP, ATXN1, LCK, TOPBP1, JAK2	776	182	16881	1.7929	1	1
GOTERM_MF_DIRECT	GO:0031435~mitogen-activated protein kinase kinase kinase binding	4	0.483676	0.0405263	CDC42, MAP2K4, MAPK1, TGFBR2	776	17	16881	5.11856	1	1
GOTERM_MF_DIRECT	GO:0003682~chromatin binding	27	3.26481	0.0377756	PRKAA1, CCNT2, TSHZ3, SHMT2, HDAC1, RBPJ, PHF21A, UXT, NUP62, TRIM24, GABPA, NCOA1, TLE4, CREBBP, RING1, USP3, CBX1, PBX2, ARID3A, SSRP1, FOS, MLH1, RUNX2, BCL6, WAC, ATF5, JDP2	776	391	16881	1.50219	1	1
GOTERM_MF_DIRECT	GO:0019843~rRNA binding	6	0.725514	0.0350958	MRPS15, EMG1, RNASEL, RPS5, RPL12, RPL8	776	40	16881	3.26308	1	0.955176
GOTERM_MF_DIRECT	GO:0019899~enzyme binding	24	2.90206	0.0340813	NCOA1, CUTA, EGLN1, BTG1, CPSF1, PRMT1, HDAC1, CBX1, GOT2, PTEN, CASC3, BCL10, PTGS2, HIF1A, IGF2R, PIAS1, NFKBIA, PPP1R3B, PPP1R3D, LAMP2, MDM4, PDCD2, RAF1, BLZF1	776	333	16881	1.56785	1	0.953331
GOTERM_MF_DIRECT	GO:0005484~SNAP receptor activity	6	0.725514	0.0318695	STX12, STX7, SNAP23, STX6, STX3, SEC22B	776	39	16881	3.34675	1	0.916932
GOTERM_MF_DIRECT	GO:0000287~magnesium ion binding	17	2.05562	0.0260986	PTEN, PDXP, ATP11B, IRAK3, NLRC4, IRAK4, COMT, STK4, SRPK1, SNRK, RRAGC, PAPOLA, IDH3B, PGM2, MAP3K8, NUDT16, MAP3K5	776	204	16881	1.81282	1	0.77298
GOTERM_MF_DIRECT	GO:0019905~syntaxin binding	9	1.08827	0.0246368	ABCA1, STXBP3, STX7, VPS52, SNAP23, STX6, STXBP5, SEC22B, SYTL3	776	77	16881	2.54266	1	0.751795
GOTERM_MF_DIRECT	GO:0001784~phosphotyrosine binding	4	0.483676	0.0195217	MAPK1, CBL, LDLRAP1, SAMSN1	776	13	16881	6.6935	1	0.614322
GOTERM_MF_DIRECT	GO:0004331~fructose-2,6-bisphosphate 2-phosphatase activity	3	0.362757	0.0191882	PFKFB2, PFKFB4, PFKFB3	776	5	16881	13.0523	1	0.614322
GOTERM_MF_DIRECT	GO:0050544~arachidonic acid binding	3	0.362757	0.0191882	ALOX5AP, STX3, S100A9	776	5	16881	13.0523	1	0.614322
GOTERM_MF_DIRECT	GO:0001875~lipopolysaccharide receptor activity	3	0.362757	0.0191882	LY96, TLR4, TLR2	776	5	16881	13.0523	1	0.614322
GOTERM_MF_DIRECT	GO:0005524~ATP binding	87	10.52	0.0167731	SMG1, ACAA2, DDX3X, MCM7, LRRK2, NAT10, PIK3CB, OPLAH, HK2, IGF1R, SMCHD1, SLK, TBK1, EEF2K, FLAD1, KIF5B, LONP1, PAPOLA, PDK3, MAP3K8, KIF1B, JAK2, MAP3K5, MAP4K1, MAP2K4, DDX18, DDX59, CHUK, ACSL1, DAPK2, ABCC5, DDX56, NME3, ATP11B, CSNK1D, IRAK3, IRAK4, GTF2F2, ILF2, RUNX2, CLPX, TGFBR2, ZAP70, SARS2, KARS, KIFC2, LCK, MAK, ATP6V1B2, RAF1, TRIB1, ATP6V1A, PFKFB2, RNASEL, PRKAA1, PFKFB4, PFKFB3…	776	1495	16881	1.26594	1	0.603233
GOTERM_MF_DIRECT	GO:0004674~protein serine/threonine kinase activity	28	3.38573	0.0146974	SMG1, PRKAA1, CCNT2, CAB39, LRRK2, STK4, EEF2K, SLK, TBK1, MAPK1, PDK3, MAP3K8, PAK2, MAP4K4, MAP3K5, MAP4K1, MAP3K2, DAPK2, IRAK3, CSNK1D, IRAK4, CLK4, SRPK1, SNRK, ADCK2, MAK, STK17B, RAF1	776	376	16881	1.61997	1	0.54816
GOTERM_MF_DIRECT	GO:0004871~signal transducer activity	18	2.17654	0.0130407	CREBBP, GMFB, SLC20A1, IL10RA, GNAI3, IRS2, CBL, BMX, LITAF, ZDHHC17, GNA13, TMEM101, GNG2, GNAQ, MIER1, PPFIA1, PLCG2, S100A9	776	204	16881	1.91946	0.999998	0.505078
GOTERM_MF_DIRECT	GO:0003873~6-phosphofructo-2-kinase activity	3	0.362757	0.0118726	PFKFB2, PFKFB4, PFKFB3	776	4	16881	16.3154	0.999994	0.478227
GOTERM_MF_DIRECT	GO:0005096~GTPase activator activity	23	2.78114	0.00976071	ARFGEF1, VAV3, RALBP1, LRRK2, ARHGAP19, ARHGAP17, IQGAP1, SIPA1L2, ARHGAP15, RANGAP1, GAPVD1, ARHGAP25, ARHGAP24, ARHGAP4, RGS2, RP2, GNAQ, ARHGDIB, RUNDC1, TBC1D14, STXBP5, EVI5L, TBC1D15	776	279	16881	1.79333	0.999949	0.409543
GOTERM_MF_DIRECT	GO:0048365~Rac GTPase binding	7	0.846433	0.00928544	RALBP1, NCF2, RCC2, ARHGDIB, IQGAP1, RAB7A, ARHGAP4	776	40	16881	3.80693	0.999917	0.406541
GOTERM_MF_DIRECT	GO:0017137~Rab GTPase binding	14	1.69287	0.0086971	MYO5A, HPS6, SYTL3, RABGEF1, RAB11FIP1, AP1G1, TMEM127, VPS52, RUNDC1, TBC1D14, STXBP5, EVI5L, RAB11FIP2, TBC1D15	776	134	16881	2.27279	0.999849	0.39809
GOTERM_MF_DIRECT	GO:0017159~pantetheine hydrolase activity	3	0.362757	0.00612248	VNN1, VNN2, VNN3	776	3	16881	21.7539	0.997938	0.293587
GOTERM_MF_DIRECT	GO:0003824~catalytic activity	18	2.17654	0.00600837	PFKFB2, MGAM, PFKFB4, PFKFB3, ACSL1, GMPR2, SLC3A2, AZIN1, DCTD, HINT1, HAL, SPTLC2, FLAD1, PMPCA, ECHDC3, DIP2B, BCAT1, MUTYH	776	188	16881	2.08282	0.997686	0.293587
GOTERM_MF_DIRECT	GO:0019901~protein kinase binding	30	3.62757	0.00454589	PFKFB2, PPP1R15A, CCNT2, PTEN, IRS2, CIB1, BCL10, ATP1A1, IQGAP1, HIF1A, CDC42, RPS19, RB1CC1, TBC1D14, RICTOR, JAK2, SLC12A6, RFFL, RAB11FIP2, PAK2, MAP3K5, MAP3K2, PIH1D1, RCC2, ADAM10, TMEM173, ZC3HC1, DNAJC3, LCK, CALM3	776	376	16881	1.73568	0.989828	0.240932
GOTERM_MF_DIRECT	GO:0004672~protein kinase activity	29	3.50665	0.00450013	SMG1, RNASEL, PRKAA1, LRRK2, STK4, EEF2K, TBK1, PDK3, MAP3K8, JAK2, PAK2, MAP4K4, MAP3K5, MAP4K1, MAP3K2, MAP2K4, CHUK, DAPK2, CSNK1D, IRAK4, SRPK1, SNRK, PAN3, ADCK2, STK25, MAK, STK17B, RAF1, TRIB1	776	359	16881	1.75728	0.989346	0.240932
GOTERM_MF_DIRECT	GO:0019904~protein domain specific binding	20	2.41838	0.00341256	RCC2, ZBTB16, HMGB2, GNAI3, RAB27A, IRS2, IQGAP1, ATP1A1, RUNX2, ETV6, PIAS1, BASP1, CHMP1B, LAMP2, CHMP2B, ARFIP1, CALM3, STAMBP, GUSB, NFE2L2	776	208	16881	2.09172	0.96801	0.202144
GOTERM_MF_DIRECT	GO:0016874~ligase activity	24	2.90206	0.00331933	MYLIP, RNF34, RNF13, RING1, ACSL1, RNF38, PELI2, NSMCE1, NOSIP, UBR2, CBL, TOPORS, PJA2, PIAS1, HERC4, RNF103, C18ORF25, TRIM39, RNF149, RFWD2, TRIM24, PELI1, ARIH1, RFFL	776	270	16881	1.93368	0.96485	0.202144
GOTERM_MF_DIRECT	GO:0019003~GDP binding	9	1.08827	0.00304444	RAB21, RAB31, RALB, RRAGC, GNAI3, RAB27A, RAB5A, RAB22A, RAB7A	776	54	16881	3.62564	0.953599	0.202144
GOTERM_MF_DIRECT	GO:0004702~receptor signaling protein serine/threonine kinase activity	9	1.08827	0.00269974	MAP3K2, MAP2K4, SLK, STK25, MAP3K8, STK4, PAK2, TGFBR2, MAP4K4	776	53	16881	3.69405	0.934277	0.194188
GOTERM_MF_DIRECT	GO:0003924~GTPase activity	22	2.66022	0.00264146	RAB1A, RALB, DDX3X, LRRK2, GNAI3, RAB27A, RAB22A, TUFM, RAB21, RAB32, CDC42, GNA13, RIT1, TUBA1B, RAB31, RHOT1, RRAGC, GNAQ, ARHGDIB, RAB5A, REM2, RAB7A	776	234	16881	2.04524	0.930294	0.194188
GOTERM_MF_DIRECT	GO:0003723~RNA binding	41	4.95768	0.00254734	RNASEL, DDX3X, SRBD1, CASC3, RPL8, DUSP11, RPS14, FBL, EMG1, ATXN1, PAPOLA, RPL39, RPL19, DDX18, RBM14, DDX59, MORC3, SF3A1, YTHDF3, RPS5, RBM18, GTF3A, TRMT1, NSUN7, MIF4GD, ILF2, MRPL21, RPS25, CNOT6, ILF3, LSM7, RPUSD3, RBMS1, HBP1, RPS20, RNPS1, SNRPF, CPEB3, RBM23, SNRPA, DCP2	776	547	16881	1.63055	0.923345	0.194188
GOTERM_MF_DIRECT	GO:0004872~receptor activity	21	2.5393	0.00243988	CD93, IL10RB, SLC20A1, IL10RA, LILRB3, LILRA2, ANTXR2, TREM1, IGF2R, OGFRL1, THBD, IL18RAP, F2RL1, ITGB7, CLEC4E, CD46, TLR4, CD244, IL18R1, TNPO3, TLR2	776	217	16881	2.10521	0.914562	0.194188
GOTERM_MF_DIRECT	GO:0098641~cadherin binding involved in cell-cell adhesion	26	3.14389	0.00192272	RAB1A, DDX3X, SLC3A2, IQGAP1, ZC3HAV1, CBL, SDCBP, SLK, ATIC, KIF5B, PACSIN2, ARFIP1, PAK2, EPS15, EMD, SH3GLB1, USP8, CSNK1D, RANGAP1, GAPVD1, CKAP5, SND1, CHMP2B, NUMB, PFKP, PICALM	776	290	16881	1.95035	0.856015	0.193618
GOTERM_MF_DIRECT	GO:0043548~phosphatidylinositol 3-kinase binding	6	0.725514	0.00136684	LCK, IRS2, ATP1A1, JAK2, HCST, IGF1R	776	19	16881	6.86964	0.747754	0.152934
GOTERM_MF_DIRECT	GO:0004842~ubiquitin-protein transferase activity	29	3.50665	0.0012923	RNF34, RNF13, RNF38, UBR2, NLRC4, CBL, HERC4, TRIM24, ARIH1, ZYG11B, MYLIP, NSMCE1, KLHL2, NOSIP, FBXL15, UBE2G2, FBXO11, PJA2, TOPORS, FBXO31, UBE2W, RNF103, RFWD2, HECW2, KLHL8, KBTBD2, KBTBD7, FBXL5, RNF141	776	329	16881	1.91751	0.728064	0.152934
GOTERM_MF_DIRECT	GO:0004843~thiol-dependent ubiquitin-specific protease activity	12	1.45103	0.00103284	USP36, VCPIP1, USP8, USP15, USP32, USP10, USP9X, USP4, USP3, STAMBP, OTUD1, TANK	776	80	16881	3.26308	0.646758	0.148581
GOTERM_MF_DIRECT	GO:0031625~ubiquitin protein ligase binding	28	3.38573	0.00034227	GPI, RNF34, RALB, TSG101, CASC3, BCL10, HIF1A, TANK, TUBA1B, CASP8, ZNF746, ARIH1, RFFL, GABARAPL1, HSPA1L, ERLIN1, UBE2G2, RANGAP1, TMEM173, SCAMP3, PIAS1, NFKBIA, UBE2W, PRKAR1A, CALR, SLC25A5, TRIB1, BLZF1	776	287	16881	2.12233	0.291584	0.0574442
GOTERM_MF_DIRECT	GO:0044822~poly(A) RNA binding	78	9.43168	0.000288863	USP36, SMG1, MRPS15, ACAA2, DDX3X, HMGB2, NAT10, CASC3, APEH, RPL8, RPGR, DUSP11, NGRN, FBL, RPS14, RPS17, ALKBH5, RPS19, SNRPD2, RPL36, SNIP1, WDR6, RPS10, LBR, DDX18, TSFM, RBM14, PRMT1, RPS5, DDX56, NOSIP, EDF1, ILF2, SND1, MRPL43, TUFM, ILF3, SARS2, RPUSD3, RBMS1, SLC25A5, DUS3L, SNRPA, RBM22, USP10, RPL12, RBM4B, SLC3A2, MRPL15, ZC3HAV1, TXN, HSD17B10, SAMSN1, MRPL54, PURB, EMG1, SAP18, RPL1…	776	1129	16881	1.50292	0.25243	0.0574442
GOTERM_MF_DIRECT	GO:0003735~structural constituent of ribosome	24	2.90206	0.000233997	MRPS15, SLC25A3, RPS5, RPL12, MRPL15, RPL8, MRPL24, MRPL46, MRPL43, MRPL21, RPS14, RPS17, SLC25A28, RPS19, RPL36, RPLP2, RPS20, SLC25A5, SLC25A23, SLC25A44, RPL39, RPS10, SLC25A14, RPL19	776	222	16881	2.35177	0.209952	0.0574442
GOTERM_MF_DIRECT	GO:0061630~ubiquitin protein ligase activity	22	2.66022	0.00014161	MYLIP, RNF34, RNF13, RNF38, NOSIP, UBR2, UBE2G2, CBL, TOPORS, PJA2, CDC42, RABGEF1, UBE2W, C18ORF25, RNF149, RFWD2, TRIM24, PELI1, MDM4, ARIH1, RFFL, RNF122	776	187	16881	2.55928	0.132909	0.0475336
GOTERM_MF_DIRECT	GO:0042802~identical protein binding	59	7.13422	6.77558e-05	DAZAP2, LRRK2, PTEN, CASC3, APEH, BEST1, IGF1R, SLK, CASP8, NUDT16, TOPBP1, NUDT14, IER5, TNPO3, NDEL1, SH3GLB1, MYBPC3, IK, PRMT1, USP4, DAPK2, COMMD1, TMEM173, ZDHHC17, THAP1, DCTD, CLDN14, BIN1, LCK, LCP1, RAF1, BCAT1, KCTD17, SNRPA, USP15, SHMT2, VPS4B, BCL10, NLRC4, STK4, CDC42, SDCBP, ATXN1, PACSIN2, MAPK1, FADD, EPS15, UBQLN4, PAK2, ZBTB16, GOT2, KLHL2, NUP153, UBE2G2, IGF2R, NFKBIA, TRIM3…	776	749	16881	1.71359	0.0659566	0.034115
GOTERM_MF_DIRECT	GO:0005515~protein binding	510	61.6687	2.66887e-15	CHIC2, RBPJ, ALKBH6, GLS, RABGEF1, PSMD6, TBK1, PPP4R1, PPP4R2, GPBP1, VPS35, ANKS1A, IER5, FNBP4, DDX18, GABARAPL1, DAPK2, PIH1D1, ZNF281, DNTTIP1, RFX2, SND1, CLPX, NUP93, SIGIRR, MYL6, ZFYVE16, BIN1, PRKAR1A, DDIT3, PADI4, ATF5, SKAP2, LXN, SHMT2, ZNF20, BAZ2B, MRPL15, ZC3HAV1, IQGAP1, BCL10, MEFV, HIF1A, KIAA0040, RHOT1, PLCG2, NRBF2, ZSCAN16, ABCA1, ZNF143, CREBBP, H3F3B, ERLIN1, PBX2, SULT1…	776	8785	16881	1.26289	2.68319e-12	2.68755e-12
