# Supplementary material for: A novel lncRNA-miRNA-mRNA triple network identifies lncRNA XIST as a biomarker for acute myocardial infarction
Source: Aging (Albany NY). 2022 May 10;14(9):4085–106. doi: 10.18632/aging.204075 (PMC9134965; doi:10.18632/aging.204075)
Supplement: Supplementary Table 7 [file aging-14-204075-s008.xls]

## Sheet: Supplementary Table7
Supplementary Table 7. Total of 578 genes with degree values ≥ 5.
node_name	MCC	DMNC	MNC	Degree	EPC	BottleNeck	EcCentricity	Closeness	Radiality	Betweenness	Stress	ClusteringCoefficient
MAPK1	92556	0.2152	74	80	175.032	11	0.2	413.55	7.57015	48313.8	408662	0.10253
HDAC1	2556	0.15401	65	67	159.142	27	0.2	386.817	7.39282	36790.2	331952	0.08412
TLR4	53904	0.26014	64	66	166.803	34	0.16667	395.417	7.46577	30973.7	321456	0.14266
CDC42	8714	0.20654	54	64	153.594	26	0.2	388.667	7.42424	42396	330914	0.09772
SNRPD2	92200000000000	0.53204	59	62	185.841	6	0.16667	367.85	7.24579	13348.1	170738	0.28874
PTEN	38160	0.25923	56	58	164.756	21	0.16667	394.7	7.48148	27273	265564	0.14701
TLR2	37058	0.28377	56	56	153.314	3	0.16667	372.467	7.31425	17011.2	190720	0.17273
RPS20	69700000000000	0.58565	52	54	182.404	3	0.16667	361.917	7.22222	9650.21	117252	0.33823
POLR2F	92200000000000	0.39479	53	54	172.422	12	0.16667	360.517	7.2009	15637.3	189036	0.2355
RPS5	69700000000000	0.63586	49	49	179.35	1	0.16667	351.6	7.1459	4160.9	74362	0.40391
FBL	2620000000000	0.45751	48	49	175.879	5	0.16667	347.35	7.10101	10928	129248	0.28061
DECR1	18217	0.24594	44	49	144.908	8	0.16667	374.65	7.35129	25245.4	231390	0.1301
RPL8	69700000000000	0.58195	47	48	178.818	3	0.16667	353.033	7.15825	6338.17	82574	0.35904
NOLA2	66700000000000	0.5771	45	48	175.872	6	0.14286	341.16	7.03479	8353.9	109622	0.33067
RNPS1	92200000000000	0.62002	46	47	176.417	3	0.16667	340.633	7.05387	4647.73	68948	0.38483
RPS14	69700000000000	0.66374	45	46	178.615	2	0.16667	348.25	7.1257	4755.27	67668	0.41449
RAB5A	479000000	0.31448	46	46	131.762	2	0.2	351.667	7.17508	11278.2	105158	0.20386
RPL12	69700000000000	0.66024	43	44	177.956	3	0.16667	343.55	7.09091	3703.91	57708	0.41755
RAB7A	14926	0.26444	42	44	124.959	14	0.2	363.333	7.2862	16557.1	154862	0.16068
RAB1A	15368	0.25052	42	44	125.567	14	0.2	368.733	7.33446	22217.5	160380	0.15222
CREBBP	1732	0.19658	40	44	140.152	2	0.16667	370.35	7.32323	17831.1	174214	0.10994
SNRPF	92200000000000	0.59846	42	43	167.922	2	0.16667	342.95	7.08642	4286.21	58562	0.38095
MRPS15	64300000000000	0.65513	39	41	168.15	2	0.16667	335.35	7.02581	3762.83	47900	0.40488
JAK2	42664	0.31537	41	41	141.053	9	0.16667	364.35	7.28507	10673.2	108950	0.2122
POLR2I	92200000000000	0.49727	39	40	155.826	1	0.16667	340.567	7.07969	6686.59	84604	0.32308
TUFM	55700000	0.41041	38	40	152.69	4	0.16667	344.083	7.10438	8777.79	88928	0.25513
RPS19	69700000000000	0.72222	39	39	170.046	3	0.16667	339.983	7.08305	2926.51	49532	0.49393
RPS25	69700000000000	0.77473	37	39	172.83	3	0.16667	336.167	7.03928	2946.85	42428	0.48583
RPS10	69700000000000	0.74246	38	39	171.633	2	0.16667	337.55	7.05612	3044.76	44534	0.48583
CASC3	3920000000000	0.61288	37	38	168.057	1	0.16667	328.733	6.9798	2490.13	42984	0.40398
ILF2	242161	0.6126	24	38	157.234	8	0.16667	353.717	7.20539	12657.7	136350	0.23186
FOS	42248	0.3527	36	38	143.815	7	0.16667	366.967	7.31313	12721.8	123854	0.22191
PTGS2	44122	0.35496	36	38	143.516	5	0.16667	358.633	7.25589	11698.2	117912	0.22333
RPS17	69700000000000	0.80405	35	37	170.008	1	0.16667	336.8	7.05948	3382.2	43226	0.50901
HIF1A	3276	0.24859	32	36	136.142	15	0.2	369.05	7.35466	16173.2	150698	0.14603
MRPL15	21200000000000	0.66015	32	35	158.743	3	0.16667	323.567	6.93827	4783.99	56706	0.40168
RPL19	69700000000000	0.80405	35	35	166.011	1	0.16667	330.767	7.00112	1227.1	26050	0.56975
NFKBIA	39067	0.35381	34	35	144.916	1	0.16667	365.217	7.31987	9220.66	101884	0.23866
LRRK2	208	0.18804	27	35	116.168	14	0.2	360.25	7.28956	18435	147894	0.08571
SNRP70	92200000000000	0.67927	31	34	148.964	6	0.16667	329.883	6.99551	5336.45	48650	0.41533
RPL36	69700000000000	0.7733	33	34	161.725	4	0.16667	327.017	6.96857	2695.56	34936	0.52585
UBE1C	92200000000000	0.65011	31	34	113.681	8	0.16667	336.883	7.08866	12478.1	79874	0.3975
LCK	4838	0.29283	30	34	117.372	5	0.16667	349.817	7.19529	10901.1	94152	0.16934
SNRPA	92200000000000	0.70515	33	33	161.725	1	0.16667	332.1	7.01571	1388.74	26302	0.50947
GTF2F2	92200000000000	0.64082	32	33	147.212	2	0.16667	321.467	6.9349	3457.48	44762	0.43939
SNAP23	6230000000	0.4373	31	33	111.359	1	0.16667	340.467	7.11223	10733.6	71334	0.28409
TXN	1773	0.23569	28	33	119.081	13	0.16667	369.167	7.35017	17204.3	137806	0.12879
MRPL24	41900000000000	0.65739	32	32	158.741	5	0.16667	321.85	6.93154	1816.23	26438	0.47984
FPRL1	6230000000	0.43918	32	32	115.237	3	0.16667	336.067	7.06846	6096.82	61948	0.32056
MGAM	3628855	0.4334	18	32	105.985	6	0.16667	342.933	7.13805	13365	103172	0.12702
LSM7	92200000000000	0.58889	31	31	147.715	3	0.14286	321.843	6.92817	2343.32	29196	0.43441
RPLP2	69500000000000	0.8571	31	31	162.745	1	0.16667	319.317	6.89675	742.487	16018	0.63226
CBL	479000000	0.42122	29	31	114.97	3	0.16667	342.117	7.13131	8230.46	71000	0.27742
MAP3K5	3254	0.29388	29	31	129.069	6	0.16667	352.417	7.22559	7684.53	74868	0.19355
MDH2	21663	0.38134	26	31	106.99	3	0.16667	338.433	7.10213	9091.24	73266	0.2086
CSNK1D	39900000	0.83419	12	30	134.217	27	0.16667	358.117	7.27385	17312.7	149510	0.1908
CPSF1	92200000000000	0.78602	30	30	151.15	3	0.16667	315.25	6.88103	960.772	18446	0.58621
RPL39	66800000000000	0.81993	30	30	160.422	1	0.14286	319.726	6.90909	884.997	17100	0.61149
EMG1	160000000	0.61061	29	30	150.342	2	0.14286	328.56	7.00112	2823.99	36912	0.42989
PRMT1	20412	0.41441	24	30	143.797	5	0.16667	346.167	7.15376	8675.94	89522	0.21379
CHUK	18110	0.38288	24	30	117.98	7	0.16667	347.783	7.19529	10796.3	94568	0.1977
RAD23B	174000000000	0.43429	29	30	148.48	2	0.16667	340	7.09764	5924.14	76256	0.30575
ILF3	957848	0.51297	28	30	157.627	5	0.16667	337.333	7.06285	4587.89	52010	0.34023
IGF2R	479000000	0.45495	24	30	97.562	5	0.16667	330.583	7.04826	7713.45	56102	0.23678
ZBTB16	92200000000000	0.78903	27	30	114.063	1	0.16667	320.867	6.93827	5654.52	36962	0.49425
CD59	6230000000	0.42775	29	30	98.534	5	0.16667	330.733	7.03816	8095.17	59430	0.30115
ATP5B	24800	0.35353	28	30	116.322	4	0.16667	331.733	7.05275	6378.18	59198	0.23448
CYC1	34630	0.38819	28	30	113.265	4	0.16667	333.533	7.06846	5918.91	58188	0.25747
PAPOLA	92200000000000	0.83345	26	29	142.338	3	0.16667	327.35	6.99327	5214.68	53736	0.52217
SF3A1	92200000000000	0.78903	27	29	150.898	2	0.16667	328.883	7.0101	4833.77	44914	0.52709
CASP8	52970	0.44082	29	29	126.487	3	0.16667	343.6	7.15488	3604.33	43578	0.33251
UBQLN4	174000000000	0.53603	24	29	142.819	4	0.2	338.783	7.11672	10184.4	110488	0.29557
EIF3S4	24800000000000	0.72337	26	28	151.835	4	0.16667	320.217	6.92031	2780.33	37464	0.48677
DDX39	4731432	0.54763	28	28	148.148	1	0.16667	328.283	7	1718.69	27080	0.41799
SF3B14	92200000000000	0.89092	25	28	144.457	2	0.16667	314.117	6.8642	4115.29	42368	0.56085
EPS15	479000000	0.44126	25	28	100.952	1	0.2	332.067	7.06061	7299.73	62848	0.27778
KLHL2	92200000000000	1.09151	22	28	100.414	3	0.16667	309.483	6.844	4814.78	32698	0.55556
PJA2	92200000000000	1.16682	20	28	100.64	3	0.16667	318.433	6.94052	7575.54	38838	0.50529
ANAPC5	92200000000000	1.16682	20	28	112.804	1	0.16667	321.7	6.96184	5338.29	36936	0.51323
MNDA	40918	0.27035	28	28	89.57	4	0.16667	324.583	6.97306	5282.33	45412	0.20635
NDUFS8	34408	0.36047	28	28	104.426	2	0.16667	327.183	7.00898	5439.46	48990	0.27513
ACO2	21777	0.35301	25	28	99.151	3	0.16667	326.517	7.00786	7518.82	65024	0.22222
PCF11	92200000000000	0.82222	27	27	140.85	2	0.14286	309.593	6.83165	1008.27	18024	0.63533
UTX	76	0.14527	23	27	101.386	11	0.16667	349.2	7.19978	14081.7	104006	0.08547
SSRP1	791	0.25793	20	27	115.008	4	0.16667	332	7.03816	6673.49	55826	0.12251
CXCL1	5305	0.38134	26	27	115.936	3	0.16667	342.4	7.15039	5885.65	56660	0.27635
IGF1R	9576	0.37837	24	26	115.502	7	0.16667	342.567	7.15376	4389.82	45788	0.25846
SF3A2	92200000000000	0.81773	26	26	140.839	2	0.14286	313.36	6.87542	877.755	13112	0.64
FBXO11	92200000000000	0.95494	24	26	99.098	3	0.16667	309.317	6.84848	2691.55	23976	0.65231
KBTBD7	92200000000000	0.90773	25	26	97.676	2	0.16667	299.6	6.73737	1484.4	10236	0.66462
HECW2	92200000000000	1.16682	20	26	96.914	2	0.16667	305.417	6.80808	3608.81	21634	0.58769
ARG1	42069	0.36802	23	26	101.366	5	0.16667	340.917	7.14029	5266.43	47764	0.23692
RAF1	6727	0.3446	25	26	111.204	1	0.16667	342.867	7.16386	4404.81	42112	0.25231
CLEC4D	6230000000	0.50715	26	26	99.953	1	0.16667	319.5	6.93378	4051.76	42372	0.39692
PPIH	92200000000000	0.8329	23	25	138.477	1	0.16667	317.267	6.91807	2036.34	22066	0.57333
SIAHBP1	92200000000000	0.95396	23	25	138.146	2	0.16667	323.733	6.97082	1531.93	18126	0.65667
RBM22	92200000000000	0.82368	25	25	138.97	2	0.14286	308.91	6.82828	2248.67	22924	0.65333
TBK1	10876	0.37239	17	25	95.022	5	0.16667	327.667	7.03704	6691.18	57670	0.16
FBXL5	92200000000000	1.01691	23	25	98.969	1	0.16667	300.6	6.76207	1891.66	11780	0.7
ZNF294	92200000000000	1.16682	20	25	107.754	2	0.16667	307.483	6.81481	3313.81	33100	0.65333
MCM7	106	0.18401	23	25	99.729	7	0.16667	339.183	7.13131	9352.28	81288	0.12667
PSMB7	2750	0.29837	25	25	126.754	1	0.16667	338.95	7.1257	4542.58	62964	0.23667
FBXL15	92200000000000	1.02175	23	25	93.839	3	0.16667	294.9	6.69248	4283.35	28434	0.70333
RANGAP1	1732	0.36429	17	25	101.099	6	0.16667	336.05	7.08642	9688.21	72866	0.15667
NUP153	3630118	0.41645	23	25	120.034	5	0.16667	332.883	7.0651	6763.92	67840	0.28667
VPS35	2289	0.38647	22	25	90.639	5	0.2	325.167	7.0202	6140.16	51942	0.24667
MAP2K1IP1	6230000000	0.95141	15	25	101.249	2	0.16667	338.483	7.12682	7206.03	58034	0.34333
ADAM10	6230000000	0.59349	21	25	94.667	2	0.16667	320.283	6.94725	4768.69	35016	0.35
DUSP1	2266	0.35513	22	24	108.345	8	0.16667	336.383	7.11111	4568.97	46776	0.24638
RBM14	90283	0.51595	19	24	121.072	5	0.16667	319.9	6.93266	4179	38784	0.27899
SLU7	22200000000000	0.9035	22	24	133.681	1	0.14286	306.576	6.81033	1150.2	13026	0.62681
MRPL21	51700000	0.59459	24	24	134.154	2	0.16667	318.733	6.92705	1706.05	21532	0.47826
MYO5A	1237	0.31476	23	24	94.655	5	0.16667	330.65	7.0651	5275.71	45186	0.23551
FBXL13	92200000000000	1.02175	23	24	93.524	2	0.16667	302.5	6.78339	1343.85	12554	0.76449
ATIC	62	0.16161	18	24	80.282	2	0.16667	329.183	7.04377	8685.5	64328	0.08333
TSG101	499	0.36729	18	23	84.182	8	0.2	324.05	7.01347	13146.7	99456	0.19763
SEC22B	7245	0.37602	22	23	78.975	2	0.16667	319.967	6.97194	3892.91	32204	0.28458
FADD	17749	0.46673	20	23	101.489	2	0.16667	331.083	7.06846	4983.35	46916	0.3004
LAMP2	944	0.26001	21	23	81.355	11	0.16667	331.883	7.08193	12908.6	86848	0.18182
KARS	131100	0.37287	23	23	134.88	2	0.16667	335.567	7.10101	3961.88	47570	0.30435
TRIM39	92200000000000	1.16682	20	23	99.784	1	0.16667	310	6.87318	1904.91	13842	0.75099
UBE2G2	92200000000000	1.16682	20	23	93.06	5	0.16667	303.6	6.79686	4437.15	23600	0.75099
UBR2	92200000000000	1.00273	22	23	101.866	1	0.16667	304.167	6.80696	910.993	8538	0.75889
DDX3X	60	0.22992	13	23	99.631	7	0.16667	331.333	7.05724	10383.1	78782	0.07905
CD93	6230000000	0.66324	20	23	90.154	3	0.16667	323.117	6.98316	5658.41	46924	0.42688
SLC2A3	6230000000	0.55204	23	23	101.748	1	0.16667	326.117	7.02245	3908.18	37598	0.45059
PSMB1	226	0.26803	19	23	109.535	7	0.16667	337.4	7.1257	8548.94	75718	0.1581
MYLIP	92200000000000	1.16682	20	23	91.863	1	0.16667	302.367	6.79574	1219.96	9002	0.75099
DDX18	20415	0.49585	19	22	120.927	2	0.14286	311.893	6.8541	2010.09	23262	0.32035
IMP4	79900000	0.65282	22	22	125.331	1	0.14286	309.91	6.85522	1272.1	20088	0.54113
RAB27A	5962	0.37692	16	22	85.368	1	0.16667	329.2	7.06622	5935.48	51694	0.24675
RNF34	92200000000000	1.16682	20	22	88.363	5	0.16667	292.2	6.68013	3325	18852	0.82251
HERC4	92200000000000	1.07959	21	22	91.8	1	0.16667	299.2	6.75196	1270.93	7600	0.82684
LRRC41	92200000000000	1.09151	22	22	91.165	1	0.16667	291.133	6.66442	54.319	1270	0.90476
FBXO31	92200000000000	1.09151	22	22	86.805	1	0.16667	291.133	6.66442	54.319	1270	0.90476
HINT1	10965	0.32783	21	22	112.692	2	0.16667	320.467	6.94052	5349.63	50898	0.25108
ITPA	110	0.25128	16	22	79.668	4	0.16667	322.683	6.98878	7314.93	53876	0.12554
COX5A	23567	0.53605	19	22	91.085	1	0.16667	310.45	6.86195	3185.35	26964	0.35065
NAT10	36017	0.46278	18	21	104.719	7	0.14286	309.393	6.83838	5268.31	47330	0.3
WBP4	92200000000000	1.06541	19	21	124.526	3	0.14286	298.343	6.73176	1692.56	16358	0.7619
COMMD1	39900000	0.49217	18	21	81.21	3	0.16667	305.4	6.83389	3701.97	35172	0.31905
ZAP70	329	0.27914	18	21	84.819	4	0.16667	317.083	6.92593	2807.08	30196	0.18095
TSFM	44400000	0.74192	18	21	120.209	1	0.16667	320.85	6.96633	2344.51	27508	0.48095
STAM2	479000000	0.54656	20	21	81.438	1	0.16667	311.333	6.88552	2616.32	25696	0.42381
IL10RA	205	0.27635	20	21	78.269	2	0.16667	303.15	6.77441	3600.2	38420	0.21429
MCL1	12570	0.42214	19	21	105.813	1	0.16667	324.883	7.0101	1990.69	23006	0.3
PICALM	479000000	0.56286	19	21	75.745	1	0.16667	311.983	6.90011	3192.43	25882	0.4
NUP62	3629295	0.46059	20	21	110.445	1	0.16667	315.35	6.90011	2503.71	28622	0.35714
IL8RB	1536	0.42096	17	21	96.231	1	0.16667	327.033	7.02132	3595.56	40286	0.2619
SLCO4C1	6230000000	0.6905	18	21	73.798	7	0.16667	300.4	6.76431	10396.8	77574	0.44762
CMTM6	6230000000	0.6905	18	21	76.14	2	0.16667	302.367	6.789	4289.33	36310	0.44762
IQGAP1	803	0.29383	18	21	102.194	2	0.16667	344.983	7.19641	4110.93	42104	0.19048
HK2	311	0.33056	18	21	80.817	1	0.16667	326	7.02694	4481.06	42112	0.21429
NDUFA9	34237	0.53428	20	21	92.505	1	0.16667	306.817	6.82828	1485.15	17760	0.41429
PIK3CB	4336	0.43602	20	20	101.223	2	0.16667	328.167	7.04265	1831.04	21534	0.37368
CALR	51	0.26242	8	20	94.457	13	0.2	345.917	7.20875	9268.32	78400	0.1
COX7C	18128	0.45444	20	20	110.554	4	0.16667	306.2	6.8092	1568.06	20148	0.38947
DDIT3	513	0.34844	19	20	88.694	5	0.16667	328.333	7.04265	2854.41	28398	0.27368
GAPVD1	479000000	0.60306	19	20	82.892	1	0.16667	308.017	6.85859	1363.7	14518	0.47368
ARPC5	479000000	0.58766	18	20	76.715	3	0.16667	314.517	6.92031	3640.3	28382	0.42105
UBE2W	92200000000000	1.16682	20	20	87.797	1	0.16667	287.95	6.63636	0	0	1
CTSS	1020	0.36729	18	20	78.511	1	0.16667	311	6.87205	3219.65	36368	0.26316
SRP68	21000000000000	1.07668	17	20	130.412	1	0.14286	295.86	6.6936	1702.67	21986	0.7
USP8	232	0.2782	16	20	73.962	9	0.2	319.9	6.98541	9144.97	73080	0.16316
PRKAA1	39	0.23943	10	20	75.133	4	0.16667	325.683	7.03143	6368.84	46534	0.09474
STX7	6873	0.42605	18	19	76.65	11	0.2	310.25	6.89113	3592.68	29370	0.33918
EXOC6	1876	0.37524	19	19	79.09	1	0.2	317.533	6.95623	3588.73	35436	0.32749
MAP2K4	301	0.37463	18	19	94.108	3	0.16667	330.517	7.07969	1967.7	20892	0.29825
SSR4	87200000000	1.02476	14	19	119.173	5	0.16667	305.167	6.82828	3366.86	39430	0.53216
PLCG2	1041	0.36729	18	19	94.383	4	0.16667	319.967	6.96296	2135.57	24250	0.2924
GABARAPL1	105	0.26025	16	19	64.898	4	0.2	315.95	6.94052	7081.81	49122	0.16959
SAP18	1609	0.34525	18	19	102.08	3	0.16667	312.983	6.88889	1963.04	20072	0.27485
APEX1	116	0.22112	19	19	103.163	2	0.16667	342.633	7.17621	4958.12	49512	0.19298
PSMD6	180	0.28334	17	19	100.238	4	0.16667	332.167	7.09428	2866.04	33248	0.20468
DNAJC3	40359	0.38589	16	19	72.502	1	0.16667	322.85	7.00112	2975.13	22838	0.25146
SIRPA	3628878	0.51001	17	19	90.436	2	0.16667	321.3	6.98765	3131.12	25870	0.36842
GPI	441	0.42179	16	19	86.109	4	0.16667	328.767	7.05836	4068.81	35588	0.27485
MRPL43	40700000	0.75287	17	18	122.602	1	0.16667	316.05	6.9248	1341.47	16932	0.60784
DDX56	28090	0.56537	16	18	103.5	3	0.14286	300.793	6.74523	2202.34	21488	0.41176
RAB32	11785	0.41286	17	18	73.193	5	0.16667	312.617	6.9046	4187.3	38030	0.33333
SMG1	1310000000000	0.96024	16	18	123.971	1	0.16667	296.567	6.71829	546.502	7442	0.69935
RB1CC1	72	0.22436	16	18	71.099	2	0.16667	324.817	7.0303	5034.98	39858	0.1634
USP4	45	0.36588	7	18	92.988	4	0.16667	315.733	6.93715	7933.45	68710	0.09804
EIF3S6IP	20900000000000	0.97954	17	18	128.817	1	0.16667	290.95	6.64983	496.723	6766	0.79085
BCL6	215	0.28042	15	18	82.498	5	0.16667	333.3	7.08418	5546.42	48210	0.18301
BCL10	11092	0.39667	18	18	93.671	1	0.16667	314.95	6.93266	1269.28	16430	0.35294
KIF5B	865	0.37055	15	18	67.466	1	0.2	319.967	6.99327	3036.04	22250	0.24183
SHMT2	94	0.21303	18	18	72.662	3	0.14286	313.56	6.90797	2886.56	24964	0.18954
BIN1	479000000	0.58766	18	18	77.107	2	0.16667	309.6	6.87879	1263.22	13950	0.52288
RICTOR	154	0.40573	9	18	90.212	3	0.16667	325.717	7.0404	5861.32	54958	0.13072
ARPC2	479000000	0.57297	18	18	70.41	1	0.16667	306.233	6.84175	999.623	11036	0.5098
RHOT1	33	0.15022	15	18	54.58	2	0.16667	314.3	6.91919	3577.57	26198	0.09804
VPS52	172	0.30733	12	18	57.064	6	0.16667	312	6.91807	5607.1	36638	0.15686
CKAP5	1575	0.35052	15	18	64.822	4	0.16667	320.917	6.99663	5831.48	37998	0.22876
RUNX2	361	0.33049	15	18	85.901	5	0.16667	332.433	7.08866	7075.17	54620	0.21569
GNAI3	950	0.38589	16	18	94.806	1	0.16667	332.6	7.09989	2418.44	22652	0.28105
LCP1	28	0.25611	7	18	61.093	2	0.16667	315.683	6.93042	5819.43	50512	0.08497
F5	863	0.28334	17	18	67.126	1	0.16667	316.633	6.95286	3458.77	27062	0.22876
GNG2	953	0.42062	15	18	80.624	3	0.16667	323.667	7.01235	5001.72	36508	0.27451
FTH1	754	0.71324	6	18	77.962	2	0.16667	324.383	7.01347	5720.43	41788	0.15686
SLC25A3	11054	0.47297	14	18	90.361	2	0.16667	325.267	7.03704	5594.71	43260	0.27451
MRPL46	44300000	0.90089	14	17	109.85	2	0.14286	295.443	6.71044	1367.31	14420	0.58824
EGLN1	60	0.33413	9	17	72.898	8	0.16667	327.083	7.05499	4496.7	39396	0.11765
STX6	6782	0.53079	15	17	72.459	2	0.16667	313.7	6.93378	2675.95	22278	0.38971
STAMBP	181	0.3366	12	17	66.543	2	0.16667	302.717	6.81033	3350.91	29170	0.18382
EXOC8	1005	0.3141	16	17	68.393	6	0.16667	312.133	6.90797	3203.75	25658	0.25735
CFLAR	10604	0.54239	17	17	106.606	1	0.16667	324.25	7.02694	834.551	11336	0.49265
KIFAP3	824	0.59666	9	17	61.376	4	0.16667	310.933	6.90572	5498.65	37984	0.19853
COPZ1	877	0.55867	10	17	62.352	4	0.16667	316.733	6.96184	4702.9	31134	0.20588
RABGEF1	7474	0.49073	15	17	87.179	3	0.2	323.55	7.02132	1991.01	27512	0.36765
NCF2	518	0.41061	15	17	75.853	2	0.16667	317.95	6.94388	2874.9	28066	0.30147
NUP210	3629352	0.57477	17	17	100.127	1	0.16667	304.85	6.8092	949.944	15916	0.52206
AHCTF1	1804	0.42062	15	17	66.852	2	0.16667	306.7	6.86195	3359.58	23438	0.30882
CCNT2	41071	0.50675	14	17	78.606	1	0.16667	294.8	6.73064	2173.26	20014	0.33088
TMC6	6230000000	0.86152	16	17	76.411	2	0.16667	299.317	6.76319	3016.24	23172	0.70588
ORM2	41170	0.45334	17	17	70.894	3	0.16667	320.95	6.98541	1350.67	14648	0.41176
SRGN	204	0.31046	15	17	61.375	1	0.16667	303.983	6.81481	2021.74	20012	0.22794
PDHA1	11379	0.5205	16	17	78.259	3	0.16667	305.633	6.83726	1392.62	16350	0.42647
GOT2	343	0.3141	16	17	74.518	1	0.16667	308.117	6.86532	1733.05	17938	0.25735
SLC25A5	336	0.45814	11	17	83.742	4	0.16667	310.617	6.88215	6510.52	48690	0.19853
NDUFS5	10944	0.40477	17	17	90.062	3	0.16667	302.317	6.78788	2138.17	22440	0.36765
USP15	58	0.38039	6	16	82.121	5	0.16667	313.433	6.91807	3795.59	36074	0.11667
NFE2L2	3782	0.52927	14	16	105.442	2	0.16667	346.133	7.20651	2208.01	27710	0.39167
CD55	138	0.24879	12	16	66.505	7	0.16667	323.617	7.01684	5309.58	40386	0.14167
RPP21	39900000	0.93324	11	16	105.349	2	0.14286	310.91	6.88552	2058.72	18706	0.46667
RFWD2	41	0.45378	5	16	64.92	4	0.16667	304.9	6.84848	4186.03	31914	0.1
ATP6V1A	37	0.2864	9	16	60.102	7	0.16667	309.95	6.89562	8119.1	53928	0.1
PPP1R15A	39	0.2864	9	16	52.714	1	0.16667	301.1	6.80247	3957.44	34200	0.14167
TREM1	746	0.48423	14	16	76.294	2	0.16667	297.133	6.74747	1836.7	18062	0.36667
TRIM24	1458	0.31531	14	16	71.468	3	0.16667	322.167	6.99663	3072.06	26678	0.23333
MMP25	6230000000	0.88963	14	16	69.157	2	0.16667	301.45	6.79461	2726.4	20436	0.65833
SLC15A4	6230000000	0.88963	14	16	75.856	3	0.16667	303.333	6.8193	4821.44	35910	0.65833
IDH3B	920	0.43905	12	16	59.026	2	0.16667	297.867	6.76207	2737.83	19884	0.25833
PFKP	273	0.40874	13	16	60.71	2	0.16667	301.25	6.81033	1458.83	13080	0.275
NDUFB3	12279	0.50074	15	16	69.549	2	0.16667	294.85	6.72727	2992.9	25876	0.41667
COG2	161	0.28101	13	16	64.316	1	0.2	324.267	7.04153	3417.13	26834	0.18333
STXBP3	6175	0.57432	14	15	60.592	1	0.16667	297.783	6.77104	829.006	7680	0.48571
EIF2C4	71	0.31924	10	15	70.39	5	0.16667	322.45	7.00561	3759.4	28632	0.1619
LY96	6154	0.44065	15	15	85.387	3	0.16667	316.9	6.95062	884.748	13884	0.41905
CALM3	35	0.32073	8	15	66.224	8	0.16667	324.917	7.03255	4650.52	34910	0.10476
MRPS27	806411	0.63062	14	15	96.871	1	0.14286	293.243	6.70034	607.021	6782	0.53333
RAB22A	10833	0.43918	14	15	58.369	1	0.16667	296.05	6.75309	3073.82	26792	0.37143
COMMD6	39900000	0.63094	15	15	69.113	1	0.16667	288.817	6.67901	889.006	11368	0.6
PAK2	129	0.39027	11	15	81.068	1	0.16667	320.167	6.98878	1758.81	16590	0.24762
CAPZA2	226	0.35765	13	15	57.106	3	0.2	312.4	6.92929	2867.26	19144	0.26667
REPS2	479000000	0.77702	14	15	63.376	2	0.16667	287.883	6.65432	2078.22	18552	0.65714
SDCBP	40329	0.59858	10	15	64.652	1	0.16667	324.167	7.02694	2293.99	20010	0.29524
IL1R2	195	0.36587	12	15	62.208	2	0.16667	293.583	6.70819	3324.27	32600	0.24762
NT5C2	45	0.25938	10	15	46.145	2	0.16667	301.283	6.79574	3479.31	23732	0.13333
S100A9	650	0.51092	13	15	71.365	1	0.16667	303.333	6.80808	1812.46	18774	0.38095
NUP93	3629208	0.63094	15	15	86.721	1	0.14286	291.343	6.68462	281.512	6400	0.6
CX3CR1	1082	0.43064	15	15	83.162	1	0.16667	312.183	6.90797	594.999	8456	0.40952
STX12	6842	0.61311	13	15	70.228	1	0.16667	306.017	6.87205	692	8376	0.45714
ABCA1	48	0.33413	9	15	73.098	1	0.16667	331.417	7.08866	3083.65	27680	0.13333
RAB31	11549	0.53647	13	14	63.296	2	0.16667	301.883	6.81594	1668.02	15560	0.46154
PFKFB3	124	0.36587	12	14	59.203	3	0.16667	309.317	6.90797	2126.04	18668	0.27473
TSR2	21603	0.63865	13	14	88.33	2	0.14286	279.46	6.52413	1949.19	29318	0.54945
LGTN	362885	0.85919	9	14	98.107	3	0.14286	295.71	6.72391	2047.5	21262	0.40659
TSC22D3	64	0.37904	8	14	67.636	12	0.2	310.267	6.91246	8501.93	63302	0.14286
MAP4K4	136	0.32657	14	14	65.734	3	0.16667	305.1	6.85522	1702.14	16696	0.31868
TBC1D15	900	0.43905	12	14	58.32	4	0.16667	298.65	6.77666	1649.93	14704	0.32967
RAB21	11557	0.56202	13	14	67.333	1	0.16667	300.783	6.80696	500.543	5202	0.48352
MAP3K8	265	0.5012	9	14	71.351	4	0.16667	314.05	6.9349	6058.22	43812	0.23077
USP9X	17	0.30898	3	14	72.99	3	0.16667	315.983	6.97082	2402.88	21370	0.06593
ZNF593	5788	0.54149	12	14	100.038	1	0.14286	287.043	6.63412	783.957	8524	0.40659
GCA	40327	0.69213	9	14	66.701	3	0.16667	316.9	6.95511	2171.45	16692	0.34066
GUSB	40331	0.42151	13	14	60.598	2	0.16667	316.733	6.95623	3135.25	19544	0.36264
RING1	16	0.2842	4	14	48.58	6	0.16667	307.867	6.8642	4588.47	30362	0.04396
STAG2	743	0.39027	11	14	65.409	1	0.16667	309.35	6.87654	2007.44	16826	0.25275
GPR97	6230000000	0.9963	13	14	68.24	1	0.16667	292.767	6.70034	356.39	2274	0.85714
ORM1	1564	0.43918	14	14	54.627	1	0.16667	303.567	6.83726	992.576	9400	0.42857
ACTN1	133	0.23775	6	14	47.697	1	0.16667	300.833	6.80696	2065.46	16018	0.16484
CALCOCO2	40	0.42794	6	14	47.571	4	0.16667	305.783	6.85634	4390.69	27268	0.0989
NDUFB11	5895	0.57691	11	14	54.014	2	0.16667	277.367	6.52525	2135.53	17112	0.37363
ECHS1	90	0.3366	12	14	63.776	3	0.14286	298.293	6.74635	3747.09	27148	0.25275
NCOA1	48	0.23416	12	14	62.853	3	0.16667	318.1	6.97868	3251.53	25594	0.17582
HDDC3	40446	0.57691	11	13	87.286	3	0.16667	290.9	6.67003	2122.95	22712	0.4359
STXBP5	5288	0.57691	11	13	48.176	4	0.16667	283.367	6.62177	1899.49	15236	0.4359
CHMP2B	278	0.40874	13	13	57.4	1	0.16667	303.917	6.84512	1292.31	13422	0.41026
VPS4B	80	0.38186	9	13	48.807	5	0.16667	301.05	6.81369	3320.63	25532	0.20513
CPSF3L	45363	0.77815	10	13	69.954	2	0.14286	270.702	6.422	1977.59	20312	0.5
SH3GLB1	36	0.25452	11	13	52.695	1	0.16667	303.833	6.83951	2423.38	20584	0.19231
PGM2	27	0.21948	10	13	40.283	4	0.14286	292.326	6.71493	3455.77	22506	0.15385
PHF21A	733	0.39905	10	13	58.55	1	0.16667	308.333	6.88103	1810.45	13430	0.25641
LDLRAP1	479000000	0.96591	12	13	66.141	1	0.16667	287.433	6.66442	96.9642	1056	0.84615
PACSIN2	479000000	0.96591	12	13	61.171	1	0.16667	283.65	6.61728	832.951	7402	0.84615
QPCT	1444	0.64439	9	13	53.436	2	0.16667	301.783	6.82379	3086.08	22504	0.35897
GNA13	58	0.38186	9	13	52.876	2	0.16667	298.983	6.78339	3549.4	30156	0.20513
VNN2	266	0.39027	11	13	46.022	1	0.16667	286.483	6.63861	1193.86	11816	0.29487
FCGR3B	191	0.45891	10	13	50.352	2	0.16667	287.417	6.64198	2984.83	27124	0.29487
POLE4	38	0.51861	5	13	49.242	6	0.14286	294.543	6.72952	7225.89	52442	0.11538
EVI2B	81	0.36587	12	13	36.952	3	0.14286	273.626	6.47138	4150.12	39812	0.32051
STX3	5168	0.59858	10	12	52.017	2	0.16667	284.4	6.63636	1299.08	9384	0.45455
FKBP5	26	0.38039	6	12	62.788	6	0.16667	314.25	6.95174	2494.44	21348	0.13636
GNAQ	104	0.35124	12	12	68.815	1	0.16667	316.55	6.96296	656.716	8202	0.36364
RALBP1	22	0.26242	8	12	59.726	2	0.16667	306.067	6.86532	2417.62	22386	0.15152
TRMT1	5048	0.47886	10	12	65.296	2	0.14286	281.152	6.56117	2358.8	24410	0.36364
TRAPPC6B	731	0.49567	8	12	39.335	3	0.16667	297.933	6.79237	3738.13	21498	0.30303
IRAK4	522	0.45368	12	12	62.935	1	0.16667	289.367	6.69473	318.503	5208	0.4697
VNN1	743	0.40723	11	12	34.853	2	0.16667	268.617	6.42649	2355.73	20034	0.36364
SORL1	93	0.3733	11	12	56.908	1	0.16667	293.217	6.74074	869.471	8406	0.33333
AKR1B1	50	0.29929	10	12	67.297	3	0.16667	309.067	6.90123	2944.04	26930	0.22727
SRPK1	15	0.25931	5	12	55.406	4	0.16667	304.767	6.85073	6366.73	43070	0.07576
SND1	1445	0.73175	7	12	61.685	1	0.16667	308.583	6.8945	1117.62	8724	0.31818
ZC3HAV1	1453	0.64146	8	12	83.391	1	0.16667	313.267	6.93715	1211.13	13736	0.37879
ADCY4	750	0.35124	12	12	68.465	1	0.16667	306.333	6.88215	1517.59	16714	0.36364
RBPJ	44	0.34989	8	12	55.029	2	0.16667	309.25	6.88552	1941.26	14206	0.18182
CLPX	24	0.38039	6	12	53.703	1	0.14286	304.093	6.83389	3040.19	20858	0.13636
OACT2	18	0.28529	6	12	20.86	2	0.16667	282.317	6.61279	2998.7	17986	0.09091
ACSL1	48	0.33919	10	12	52.099	1	0.16667	308.8	6.89226	2159.71	20712	0.25758
MRPL54	403202	0.7466	11	11	84.49	1	0.14286	276.61	6.51964	16.1124	304	0.8
RAB11FIP1	33	0.45378	5	11	34.682	3	0.16667	287.367	6.67789	2762.51	17606	0.16364
RALB	18	0.25611	7	11	47.129	6	0.16667	293.583	6.73176	3219.07	26372	0.14545
KIF1B	730	0.62199	7	11	41.287	3	0.16667	291.583	6.73064	1504.33	10902	0.32727
PTPN12	250	0.5854	7	11	56.681	6	0.16667	312.233	6.91695	3164.88	23854	0.30909
H3F3B	33	0.27934	10	11	58.902	3	0.16667	303.467	6.81145	2747.48	25620	0.25455
VAV3	309	0.47886	10	11	68.544	1	0.16667	296.967	6.76655	289.108	3154	0.43636
GAB2	154	0.43736	8	11	60.55	1	0.16667	298.733	6.76992	562.524	5596	0.32727
TXNDC3	14	0.46346	3	11	45.092	3	0.16667	301.65	6.83951	4525.08	29122	0.10909
NLRC4	201	0.43896	10	11	66.63	3	0.16667	305.417	6.8541	1890.8	20708	0.4
ATP5G2	864	0.45814	11	11	54.752	3	0.16667	292.05	6.72166	843.868	7686	0.49091
TUBA1B	16	0.32413	5	11	60.163	1	0.16667	316.033	6.98316	1423.15	15364	0.12727
ATP1A1	15	0.30898	3	11	39.703	4	0.16667	314.433	6.96857	4142.45	25992	0.09091
DMAP1	33	0.38039	6	11	40.8	3	0.16667	301.233	6.81594	3942.28	25298	0.14545
CD163	103	0.43896	10	11	58.709	2	0.16667	293.15	6.72054	578.003	5240	0.4
MLH1	58	0.32239	11	11	57.521	1	0.16667	309.95	6.91358	572.255	6244	0.34545
UBLCP1	33	0.38039	6	11	49.834	3	0.16667	292.933	6.71942	3576.78	29406	0.14545
PCNT	128	0.43905	7	11	38.809	3	0.16667	291.05	6.72503	5182.81	32788	0.21818
SLA	32	0.31026	9	11	37.64	1	0.16667	282.483	6.59147	2432.33	15984	0.23636
DCP2	18	0.25611	7	11	52.043	1	0.14286	289.426	6.66105	1767.8	13544	0.12727
ZMPSTE24	12	0.30898	3	11	29.445	3	0.16667	292.1	6.72727	5190.84	31534	0.03636
GPX4	88	0.33936	11	11	54.781	1	0.16667	306.633	6.87093	1018.98	9528	0.36364
EMD	133	0.4082	8	11	40.173	1	0.14286	291.66	6.72727	2849.63	19454	0.25455
LBR	250	0.47733	9	11	46.085	1	0.14286	283.343	6.62402	803.573	7194	0.36364
NDEL1	1445	0.6123	8	11	40.902	1	0.16667	296.167	6.77104	2450.1	15560	0.38182
NME3	65	0.31924	10	11	53.751	1	0.16667	293.55	6.73513	1574.58	13434	0.29091
TGFA	730	0.62199	7	11	61.779	1	0.16667	307.567	6.89226	910.418	7626	0.30909
NDUFA3	10807	0.67839	10	11	47.745	1	0.16667	267.35	6.41975	486.188	4774	0.61818
ACOX1	40	0.33413	9	11	51.017	2	0.16667	299.9	6.80471	1947.28	19322	0.25455
HSD17B10	21	0.33284	6	11	60.507	1	0.16667	300.4	6.80808	998.594	8856	0.14545
IRS2	371	0.43896	10	11	65.268	3	0.16667	308.367	6.89113	1503.5	14502	0.4
IK	5071	0.62053	9	10	70.97	2	0.16667	283.283	6.61167	389.633	3824	0.57778
PSCDBP	20	0.26242	8	10	33.657	2	0.16667	267.217	6.40516	716.901	4680	0.2
EDD1	11	0.30898	3	10	55.139	6	0.16667	314.867	6.95174	2845.95	20698	0.06667
IRAK3	336	0.53872	10	10	63.299	1	0.16667	302.017	6.83165	208.75	3546	0.6
HSPA1L	32	0.56839	4	10	61.457	4	0.16667	313.433	6.95511	947.853	10884	0.2
TANK	890	0.51877	10	10	54.611	1	0.16667	290.45	6.70707	238.198	2998	0.57778
ETV6	14	0.23775	6	10	38.318	2	0.16667	293.2	6.74747	2688.1	20374	0.11111
THBD	25	0.26253	9	10	47.468	2	0.14286	297.186	6.77217	3554.69	27962	0.24444
RC74	45360	0.77815	10	10	73.967	1	0.14286	266.086	6.38047	23.1154	400	0.86667
CBX1	20	0.33284	6	10	55.244	2	0.16667	309.683	6.8844	1050.14	9158	0.15556
TGFBR2	16	0.28529	6	10	51.044	2	0.16667	303.95	6.85971	1006.11	9128	0.15556
EXOC1	757	0.52506	9	10	52.037	1	0.16667	305.95	6.87654	1064.95	11330	0.48889
TMEM43	14	0.37893	4	10	22.138	2	0.16667	274.617	6.53086	2808.26	17682	0.13333
ZNF217	728	0.52483	8	10	47.973	1	0.16667	300.233	6.81033	1083.91	9278	0.4
E2F3	61	0.33413	9	10	50.783	2	0.16667	306.65	6.87767	1347.47	11004	0.31111
MAP3K2	64	0.4082	8	10	57.914	2	0.16667	307.5	6.88103	2488.37	18694	0.31111
RPGR	12	0.30898	3	10	19.346	5	0.16667	271.617	6.49607	2889.06	17288	0.11111
SOS2	57	0.31026	9	10	43.248	3	0.16667	301.017	6.82155	1695.93	11252	0.28889
RRAGC	23	0.26253	9	10	42.07	4	0.16667	299.85	6.82267	2592.91	19266	0.24444
PMPCA	895	0.59666	9	10	59.848	1	0.16667	302.8	6.84848	785.188	8470	0.55556
CD58	11	0.30898	3	10	29.565	2	0.16667	277.083	6.55668	1265.95	8392	0.08889
NFIL3	33	0.32929	7	10	52.212	3	0.16667	301	6.83951	2472.13	18410	0.2
ARHGDIB	19	0.47366	4	10	51.29	4	0.16667	303.783	6.84512	2177.87	16418	0.15556
HSD17B8	12	0.2842	4	10	17.881	2	0.14286	275.06	6.55107	3399.21	19530	0.08889
MSRA	65	0.47564	7	10	36.533	2	0.16667	289.317	6.71829	816.294	6452	0.28889
AP1G1	70	0.43736	8	10	44.872	1	0.16667	285.683	6.66667	411.221	3670	0.33333
ALOX5AP	177	0.45346	9	10	49.376	1	0.16667	287.5	6.66105	841.674	8182	0.42222
MAD1L1	1448	0.64146	8	10	47.299	1	0.16667	308.667	6.88777	841.481	8112	0.48889
RCC2	1449	0.54893	9	10	51.144	1	0.16667	303.183	6.84512	805.266	6796	0.51111
LEMD3	131	0.47564	7	10	27.571	1	0.14286	270.052	6.47363	1773.57	13270	0.28889
AGK	1443	0.73175	7	10	49.035	1	0.16667	302.333	6.84287	1878.11	13762	0.46667
TH1L	725	0.5854	7	10	73.741	1	0.16667	312.783	6.93939	2314.63	30560	0.37778
PRKAR1A	18	0.33284	6	10	62.875	2	0.16667	321.417	7.03255	1222.87	13836	0.17778
MBTPS1	24	0.29157	8	10	43.259	1	0.16667	303.4	6.84624	1060.62	9628	0.22222
UXT	18	0.38896	5	9	53.766	1	0.16667	291.117	6.69585	1299.97	11696	0.16667
VCPIP1	29	0.56839	4	9	29.98	3	0.16667	274.783	6.5275	2421.28	18012	0.19444
JTV1	14	0.32413	5	9	58.211	3	0.16667	294.233	6.74411	1713	15226	0.13889
SIGIRR	92	0.45346	9	9	48.43	2	0.16667	284.633	6.64646	138.219	2508	0.52778
GOLGA7	724	0.5854	7	9	40.151	2	0.16667	286.267	6.67003	939.971	7076	0.47222
FLJ36874	36	0.2864	9	9	47.359	2	0.14286	279.326	6.58586	883.49	7818	0.33333
KIFC2	730	0.45346	9	9	43.142	1	0.16667	292	6.74299	393.562	3574	0.52778
NUMB	32	0.32929	7	9	57.626	2	0.16667	313.117	6.95623	705.393	7884	0.25
ZNF143	40321	0.8164	8	9	56.403	1	0.14286	261.352	6.32435	95.1378	870	0.77778
OBFC2A	40321	0.8164	8	9	56.765	1	0.14286	262.752	6.34007	1049.69	10554	0.77778
IFNGR1	64	0.358	9	9	53.101	1	0.16667	296.7	6.77666	519.965	7148	0.41667
GLS	16	0.38896	5	9	32.823	3	0.14286	283.293	6.63412	1272.84	9326	0.19444
PPP4R1	15	0.28529	6	9	23.65	2	0.14286	261.743	6.36588	1689.64	14350	0.16667
CLEC4E	290	0.5012	9	9	62.104	1	0.16667	288.183	6.67677	60.8669	864	0.58333
WAC	9	0.30779	2	9	35.304	2	0.16667	283.433	6.62963	1644.01	10208	0.02778
GBE1	14	0.32413	5	9	36.139	1	0.14286	285.06	6.64534	1224.33	8448	0.13889
ATP6V1B2	17	0.33284	6	9	47.471	1	0.16667	295.15	6.77441	915.072	7860	0.19444
GMPR2	35	0.42794	6	9	42.602	4	0.14286	298.645	6.79012	1442.78	12938	0.27778
CAB39	11	0.2842	4	9	28.616	2	0.14286	286.176	6.67677	1691.19	11020	0.08333
SAMM50	13	0.37893	4	9	38.149	2	0.14286	286.279	6.64983	2196.26	16072	0.13889
CREB3L2	45	0.37904	8	9	49.16	2	0.16667	305.567	6.86756	637.675	6614	0.36111
ARID4B	35	0.42794	6	9	42.138	1	0.16667	290.7	6.70258	790.355	5394	0.25
RCSD1	10	0.30898	3	9	28.377	5	0.16667	279.617	6.5982	2042.63	14372	0.08333
ARFGEF1	10	0.30898	3	9	42.781	2	0.16667	304.333	6.86756	2349.11	18288	0.08333
AQP9	456	0.62053	9	9	44.029	1	0.16667	278.667	6.55892	34.7865	612	0.72222
PIH1D1	23	0.38039	6	9	53.762	1	0.14286	280.51	6.55331	707.621	6120	0.22222
MYL6	13	0.2842	4	9	50.333	1	0.16667	306.25	6.88664	1082.94	10424	0.16667
LONP1	127	0.37904	8	9	43.831	1	0.16667	277.333	6.56117	407.336	3320	0.36111
ACAA2	33	0.37904	8	9	41.658	1	0.16667	292.05	6.7385	999.429	8670	0.36111
RNASEL	23	0.36588	7	8	58.18	1	0.16667	306.483	6.88328	453.96	4840	0.35714
PFKFB4	38	0.47549	6	8	43.014	1	0.16667	286.25	6.67677	471.505	4846	0.35714
PPM1D	11	0.25931	5	8	58.135	2	0.16667	311.75	6.95174	925.743	8926	0.17857
PPP1R3B	8	0.30779	2	8	15.847	3	0.14286	258.812	6.32435	1917.13	12876	0.10714
NSFL1C	8	0.30779	2	8	28.302	3	0.16667	290.733	6.73737	1333.86	9412	0.03571
DDX59	723	0.5854	7	8	53.277	2	0.14286	260.921	6.30752	1836.84	25020	0.57143
TNPO3	11	0.46346	3	8	41.781	5	0.14286	275.66	6.54097	3530.37	23660	0.14286
CHMP1B	193	0.62199	7	8	36.904	1	0.16667	281.567	6.62963	579.204	4878	0.60714
HCST	16	0.33284	6	8	33.367	1	0.14286	259.96	6.32211	454.586	4592	0.28571
TSNAX	8	0.30779	2	8	24.998	5	0.14286	274.76	6.52862	5105.78	28708	0.03571
PEA15	29	0.45378	5	8	48.166	1	0.16667	303.583	6.85859	440.727	4724	0.28571
SNIP1	727	0.62199	7	8	66.358	1	0.16667	286.683	6.66218	110.661	1638	0.60714
MEFV	62	0.4082	8	8	46.692	1	0.16667	285.233	6.64983	606.766	8290	0.5
C4orf14	8	0.30779	2	8	45.545	4	0.16667	299.917	6.82492	3130.37	20280	0.03571
B4GALT7	11	0.46346	3	8	5.514	5	0.14286	227.855	5.85522	6302.75	40768	0.10714
LY9	9	0.30898	3	8	26.186	1	0.16667	275.4	6.53648	816.184	5850	0.10714
GPSN2	11	0.46346	3	8	30.401	3	0.16667	286.167	6.68687	3252.92	20362	0.10714
LRMP	722	0.71324	6	8	25.393	1	0.16667	260.3	6.36027	825.929	4878	0.57143
ARIH1	8	0	1	8	24.514	1	0.16667	281.65	6.62402	1118.22	6616	0
ING1	32	0.42794	6	8	38.378	1	0.16667	294.917	6.76768	1239.22	9336	0.32143
PIAS1	12	0.37893	4	8	47.745	2	0.16667	303.3	6.85185	1396.8	11148	0.17857
GMFG	28	0.32073	8	8	33.376	1	0.16667	266.6	6.42761	250.792	2866	0.39286
DPP7	40320	0.8164	8	8	43.98	1	0.16667	296.567	6.7789	0	0	1
STATIP1	8	0.30779	2	8	14.935	3	0.14286	261.786	6.37486	3619.72	24812	0.07143
MME	10	0.2842	4	8	29.634	1	0.16667	296.583	6.79461	1503.97	10550	0.10714
ACAD9	722	0.71324	6	8	34.159	1	0.14286	261.569	6.36139	190.039	1326	0.57143
PDE3B	12	0.37893	4	8	29.341	1	0.16667	281.65	6.61728	1392.72	10314	0.14286
TRIB1	12	0.37893	4	8	44.065	3	0.16667	292.55	6.74747	1211.63	11888	0.17857
SNX27	11	0.37893	4	7	34.686	3	0.16667	297.433	6.80471	1368.71	10028	0.2381
IL18R1	13	0.28529	6	7	27.957	1	0.16667	257.667	6.31089	105.793	1128	0.28571
PHF3	7	0.30779	2	7	31.027	3	0.14286	276.536	6.55107	1644.16	12996	0.09524
LOC51035	8	0.30898	3	7	34.318	1	0.16667	288.95	6.72615	1112.81	10280	0.14286
F2RL1	30	0.43905	7	7	55.895	3	0.16667	303.1	6.85185	155.108	2680	0.57143
FLJ31951	7	0	1	7	16.447	3	0.14286	255.943	6.30079	2499.92	15776	0
WDR6	7	0.30779	2	7	24.479	3	0.14286	259.91	6.3468	1047.47	5852	0.09524
MDM4	9	0.2842	4	7	46.899	2	0.16667	300.217	6.83053	503.485	5108	0.14286
RGS2	8	0.30898	3	7	40.943	1	0.16667	285.35	6.67452	774.183	5870	0.14286
P2RY8	8	0.30898	3	7	19.812	2	0.16667	272.367	6.50842	2126.72	14354	0.09524
DIRC2	8	0.30898	3	7	21.954	2	0.16667	276.85	6.58923	1273.6	8598	0.09524
GPX3	37	0.47549	6	7	41.666	1	0.14286	292.826	6.75421	381.39	3458	0.47619
ME2	72	0.51223	7	7	39.269	1	0.14286	284.293	6.65881	59.8756	984	0.66667
TOPBP1	11	0.37893	4	7	37.567	1	0.16667	273.383	6.52189	191.146	1834	0.19048
XTP3TPA	15	0.33284	6	7	28.192	1	0.14286	270.693	6.46577	537.216	5010	0.33333
RRM2B	9	0.2842	4	7	30.484	2	0.16667	282.617	6.65432	1006.66	9296	0.14286
ZNHIT3	8	0.30898	3	7	33.326	2	0.14286	263.888	6.3569	2228.78	20164	0.14286
MAOA	7	0.30779	2	7	27.086	3	0.16667	281.85	6.60606	3203.83	23424	0.09524
NMRAL1	15	0.47366	4	7	28.663	2	0.14286	269.676	6.47138	1590.01	11348	0.2381
VPS37C	51	0.47549	6	7	25.51	2	0.16667	269	6.47924	1793.49	14166	0.47619
PISD	10	0.46346	3	7	13.69	1	0.16667	253.033	6.25701	966.728	6010	0.14286
ICAM3	29	0.38039	6	7	35.082	3	0.14286	280.602	6.60045	662.442	7640	0.38095
RBMS1	8	0.30898	3	7	34.124	3	0.16667	285.017	6.6734	4166	30036	0.09524
CNOT6	10	0.46346	3	7	19.211	3	0.16667	266.283	6.44669	1598.52	10438	0.14286
SNX13	7	0.30779	2	7	19.889	1	0.14286	272.476	6.52525	1716.08	8708	0.09524
SCLT1	122	0.64826	5	7	26.762	2	0.16667	276.817	6.58586	2127.17	11798	0.47619
CEP135	123	0.52304	6	7	21.905	2	0.16667	268.433	6.48822	1862.76	10936	0.52381
PPP4R2	12	0.32413	5	7	19.952	1	0.16667	273.7	6.53535	885.565	6338	0.2381
DNTTIP1	721	0.71324	6	7	35.611	1	0.16667	279.05	6.57688	575.428	3380	0.71429
C14orf43	721	0.71324	6	7	38.937	1	0.16667	281.85	6.60943	72.311	572	0.71429
ERLIN1	8	0.30898	3	7	16.591	2	0.14286	266.16	6.43996	1727.99	10208	0.14286
USP32	27	0.56839	4	7	51.094	1	0.16667	281.283	6.60269	828.776	7072	0.28571
BAZ2B	7	0	1	7	23.019	2	0.14286	284.51	6.67565	1976.44	10506	0
NUDT16	28	0.45378	5	7	23.708	1	0.14286	271.143	6.49607	770.024	4384	0.33333
NCOA4	7	0.30779	2	7	24.342	2	0.16667	281.333	6.63412	2105.02	12828	0.04762
CREB5	15	0.47366	4	7	36.025	2	0.16667	300.033	6.82492	860.115	6526	0.2381
MBD4	15	0.47366	4	7	33.985	1	0.16667	291.217	6.72727	364.594	3594	0.2381
MUTYH	25	0.42794	6	7	37.526	1	0.14286	289.226	6.73064	362.654	3562	0.42857
GCC1	10	0.46346	3	7	28.451	1	0.16667	283.167	6.66554	294.156	2360	0.14286
CPD	50	0.58344	5	7	34.055	1	0.16667	281.517	6.62963	810.134	5560	0.42857
DPAGT1	7	0	1	7	21.241	3	0.16667	269.867	6.49046	2867.97	22384	0
G6PC3	12	0.32413	5	7	22.38	2	0.14286	264.026	6.40741	2197.31	17000	0.2381
MBOAT1	12	0.32413	5	7	9.081	2	0.14286	251.66	6.24916	1631.46	10348	0.2381
GNPTG	7	0	1	7	27.714	1	0.16667	288.283	6.69921	1064.32	7184	0
AFF4	721	0.71324	6	7	47.212	1	0.16667	276.217	6.54882	562.776	4384	0.71429
ARHGAP24	9	0.2842	4	7	39.924	2	0.16667	293.2	6.74299	1659.33	11226	0.14286
TPM2	8	0.30898	3	7	25.178	2	0.16667	278.883	6.60718	878.602	5384	0.14286
CDS2	11	0.37893	4	7	11.125	2	0.14286	253.01	6.26038	1094.17	5872	0.19048
SPTLC2	7	0.30779	2	7	21.585	2	0.14286	276.643	6.57464	975.361	6104	0.09524
USP10	6	0	1	6	30	3	0.14286	290.36	6.73513	846.244	6344	0
SKAP2	6	0.30779	2	6	47.771	1	0.16667	288.583	6.69697	782.255	7236	0.13333
SYTL3	6	0.30779	2	6	19.677	4	0.16667	267.133	6.45567	1833.65	9986	0.06667
TEX2	6	0	1	6	10.889	1	0.16667	254.917	6.2963	1146.76	7574	0
TMEM49	10	0.37893	4	6	19.969	2	0.16667	265.117	6.43996	473.871	3654	0.26667
OTUD1	26	0.56839	4	6	16.943	3	0.16667	254	6.27946	1988.01	13964	0.4
NSUN7	9	0.46346	3	6	33.636	4	0.14286	266.476	6.40853	1874.78	14222	0.2
KIAA0528	720	0.71324	6	6	28.866	1	0.16667	264.717	6.4321	0	0	1
ZMYM2	6	0.30779	2	6	26.887	3	0.16667	278.467	6.56902	680.533	5278	0.06667
PFKFB2	32	0.42794	6	6	23.207	1	0.14286	258.826	6.35129	153.915	1184	0.6
TMEM173	26	0.56839	4	6	34.025	2	0.16667	280.417	6.61055	634.557	4744	0.4
SNX16	6	0.30779	2	6	14.374	1	0.14286	259.91	6.38047	507.728	2902	0.06667
IL10RB	16	0.33284	6	6	36.247	1	0.16667	275.433	6.53984	45.4695	718	0.46667
MGEA5	8	0.2842	4	6	32.44	1	0.16667	293.85	6.77104	508.639	4652	0.2
CEP63	121	0.64826	5	6	27.079	1	0.16667	273.983	6.55219	221.449	1578	0.66667
FLJ10357	7	0.30898	3	6	23.19	1	0.16667	278.35	6.58361	1087.24	7308	0.2
PADI4	6	0.30779	2	6	35.509	1	0.16667	301.45	6.83389	1651.81	12302	0.13333
CD244	8	0.2842	4	6	23.26	1	0.14286	266.493	6.42649	260.879	1976	0.2
TAF7	26	0.56839	4	6	39.96	2	0.14286	268.026	6.43659	669.083	5736	0.4
HLA-DMA	26	0.56839	4	6	30.595	1	0.16667	285.533	6.68126	424.688	3356	0.4
EEF2K	6	0.30779	2	6	16.169	3	0.16667	264.383	6.43547	1655.7	11356	0.13333
SLC37A3	6	0.30779	2	6	8.689	3	0.14286	233.679	5.95847	1056.34	6316	0.06667
C19orf58	54	0.52304	6	6	33.187	1	0.16667	260.35	6.36364	26.8321	338	0.73333
SIPA1L2	10	0.37893	4	6	14.699	2	0.16667	258.767	6.35466	469.023	3342	0.26667
KCTD17	6	0	1	6	10.52	4	0.16667	251.917	6.26263	2988.11	18170	0
CYB5R4	6	0.30779	2	6	32.873	3	0.14286	285.329	6.67116	999.349	7386	0.13333
BLZF1	6	0.30779	2	6	31.517	1	0.16667	303.233	6.86981	990.952	7638	0.13333
PELI1	10	0.37893	4	6	30.315	2	0.14286	270.276	6.50056	145.487	1570	0.26667
MARCKS	6	0.30779	2	6	32.687	2	0.16667	290.617	6.72166	1597.87	12064	0.06667
RAB11FIP2	9	0.25931	5	6	31.925	5	0.16667	277.1	6.56229	4386.51	29032	0.26667
CCDC115	9	0.46346	3	6	26.249	3	0.14286	257.302	6.31313	2178.42	19346	0.2
LOC374395	720	0.71324	6	6	22.52	1	0.16667	252.333	6.25701	0	0	1
ATP11B	720	0.71324	6	6	19.796	1	0.16667	252.333	6.25701	0	0	1
SLK	6	0.30779	2	6	24.648	1	0.16667	280.933	6.63412	574.616	4048	0.06667
CUTA	6	0.30779	2	6	19.322	1	0.14286	271.793	6.52301	1505.84	8196	0.13333
ATF5	11	0.32413	5	6	23.919	1	0.16667	265.45	6.43434	189.503	1258	0.33333
TMEM127	6	0.30779	2	6	27.1	1	0.14286	284.743	6.67789	372.914	3124	0.13333
ARID4A	32	0.42794	6	6	33.535	1	0.16667	275.433	6.54321	66.01	590	0.6
ARHGAP25	9	0.25931	5	6	32.902	1	0.16667	289	6.70034	390.614	3518	0.26667
ARFIP1	6	0.30779	2	6	15.074	4	0.16667	274.567	6.5376	5185.01	30466	0.06667
APEH	6	0.30779	2	6	23.88	2	0.16667	261.45	6.38272	520.652	4318	0.13333
ZC3HC1	6	0.30779	2	6	28.248	1	0.16667	299.517	6.82941	1099.49	7772	0.06667
TOR1AIP1	9	0.46346	3	6	20.601	1	0.125	253.687	6.26375	814.307	5008	0.2
AMD1	6	0.30779	2	6	17.198	2	0.16667	267.517	6.46689	1770.07	10484	0.06667
KLHL8	6	0.30779	2	6	11.38	3	0.14286	255.119	6.29517	4103.08	24508	0.06667
MLLT6	6	0.30779	2	6	16.138	1	0.16667	261.217	6.38945	921.163	6040	0.06667
TLE4	14	0.47366	4	6	37.687	1	0.16667	283.067	6.62963	157.819	1364	0.33333
BCAT1	6	0.30779	2	6	24.716	1	0.16667	264.15	6.41077	645.962	4962	0.2
LPGAT1	5	0.30779	2	5	8.287	2	0.14286	250.66	6.23906	608.221	3234	0.1
SELT	48	0.58344	5	5	21.82	1	0.14286	263.326	6.43547	0.33333	2	0.9
SEPW1	48	0.58344	5	5	18.532	1	0.14286	263.326	6.43547	0.33333	2	0.9
SLC25A44	5	0.30779	2	5	30.781	2	0.16667	266.533	6.44557	458.464	3850	0.2
SNX10	5	0.30779	2	5	15.233	2	0.16667	252.883	6.27609	850.596	4620	0.1
LRRC8D	5	0.30779	2	5	12.916	2	0.16667	244.183	6.14254	1990.22	15948	0.1
SAMSN1	8	0.25931	5	5	17.178	2	0.14286	251.093	6.22334	122.848	1450	0.4
LILRB3	5	0.30779	2	5	11.254	1	0.14286	241.412	6.08866	447.152	4088	0.1
SLC31A2	6	0.30898	3	5	21.222	1	0.14286	261.16	6.3771	250.987	1984	0.2
EDF1	6	0.30898	3	5	38.324	1	0.14286	285.826	6.68687	205.51	2378	0.2
MCM3AP	25	0.56839	4	5	37.202	1	0.14286	257.562	6.32548	77.6066	726	0.6
SLC3A2	5	0	1	5	13.444	1	0.16667	257.85	6.34905	835.942	4780	0
NFKBIZ	18	0.45378	5	5	35.144	1	0.16667	278.4	6.60045	22.0493	308	0.7
DUS3L	5	0	1	5	9.112	1	0.14286	237.352	6.03591	340.327	1730	0
NUDT14	5	0.30779	2	5	32.949	1	0.14286	287.743	6.70258	257.004	2430	0.2
GTF3A	6	0.30898	3	5	45.732	1	0.16667	294.967	6.75645	261.624	3338	0.2
SARS2	13	0.47366	4	5	39.374	1	0.14286	268.443	6.46801	174.725	1812	0.5
MAP4K1	6	0.30898	3	5	32.869	1	0.14286	276.61	6.578	149.11	1334	0.2
CYP1B1	5	0.30779	2	5	19.398	3	0.14286	273.086	6.52525	1183.03	9726	0.1
COMT	5	0.30779	2	5	15.418	2	0.14286	265.91	6.45342	1922.05	13726	0.1
CYBRD1	5	0.30779	2	5	32.219	1	0.16667	283.533	6.63636	381.7	3326	0.2
MAN2A2	5	0.30779	2	5	19.686	3	0.16667	266.2	6.47363	834.305	6816	0.1
RBM23	6	0.30898	3	5	25.017	1	0.14286	266.81	6.44444	895.183	5458	0.2
SPAG9	9	0.37893	4	5	37.026	1	0.16667	285.467	6.68013	281.98	2354	0.4
PFTK1	5	0.30779	2	5	22.317	3	0.16667	263.1	6.41077	2045.52	13230	0.1
STK25	5	0	1	5	33.376	2	0.16667	301.533	6.85297	1177.22	9164	0
KIAA1468	5	0	1	5	14.952	2	0.16667	251.567	6.24579	1901.56	13532	0
C16orf69	8	0.46346	3	5	25.035	1	0.14286	265.126	6.42088	446.313	3032	0.4
TMEM14C	5	0	1	5	10.836	2	0.14286	236.788	6.0202	1927.84	13474	0
BEST1	6	0.30898	3	5	8.979	1	0.14286	242.712	6.11336	412.832	2108	0.2
PELI2	13	0.47366	4	5	21.895	2	0.14286	253.01	6.26936	504.472	3728	0.5
LYRM5	5	0.30779	2	5	13.506	1	0.14286	246.893	6.17733	533.429	3494	0.1
JMJD1C	5	0	1	5	18.161	4	0.16667	268.35	6.47363	1081.99	5622	0
CHSY1	8	0.46346	3	5	7.485	1	0.14286	228.498	5.89113	1331.79	8946	0.3
ATXN1	5	0	1	5	17.918	2	0.16667	266.65	6.46801	1997.43	13940	0
URM1	6	0.30898	3	5	21.333	1	0.16667	269.45	6.49495	1034.97	5528	0.2
RFFL	5	0	1	5	25.168	4	0.16667	292.067	6.76094	802.889	6404	0
DOCK11	5	0.30779	2	5	24.25	1	0.16667	287.983	6.71605	549.248	3708	0.2
HMGB2	14	0.38896	5	5	39.781	1	0.16667	288.65	6.70932	19.2418	360	0.6
IFRD1	5	0.30779	2	5	26.892	1	0.16667	281.817	6.62177	427.982	3020	0.1
HPS6	5	0.30779	2	5	18.096	1	0.14286	259.193	6.36139	262.725	1746	0.2
CIR	5	0.30779	2	5	39.756	1	0.16667	284.783	6.63636	701.381	4728	0.1
ALKBH5	6	0.30898	3	5	12.853	2	0.14286	247.505	6.18294	2111.77	13476	0.2
PCSK7	8	0.46346	3	5	22.781	1	0.16667	267.75	6.47587	110.582	924	0.3
TEX264	120	0.64826	5	5	20.276	1	0.14286	257.676	6.33221	0	0	1
SLC25A28	5	0.30779	2	5	21.127	1	0.14286	259.845	6.35466	724.637	4866	0.1
FBXO33	8	0.46346	3	5	22.055	1	0.14286	244.426	6.13917	706.843	4524	0.3
ABHD14A	6	0.30898	3	5	7.863	2	0.125	234.849	5.98653	1485.54	7964	0.2
SLC36A1	5	0.30779	2	5	18.246	3	0.14286	245.526	6.16947	3391.24	25160	0.1
