# Supplementary material for: A novel lncRNA-miRNA-mRNA triple network identifies lncRNA XIST as a biomarker for acute myocardial infarction
Source: Aging (Albany NY). 2022 May 10;14(9):4085–106. doi: 10.18632/aging.204075 (PMC9134965; doi:10.18632/aging.204075)
Supplement: Supplementary Table 9 [file aging-14-204075-s010.xls]

## Sheet: Supplementary Table9
Supplementary Table 9. Prediction results based on starBase database.
geneID	geneName	geneType	ceRNAid	ceRNAname	ceRNAgeneType	hitNum	pval	fdr	pancancerNum
ENSG00000229807	XIST	lincRNA	ENSG00000096968	JAK2	protein_coding	55	0.000864398	0.000997006	17
ENSG00000229807	XIST	lincRNA	ENSG00000070831	CDC42	protein_coding	92	0.000666724	0.000853797	7
