# Supplementary material for: A novel lncRNA-miRNA-mRNA triple network identifies lncRNA XIST as a biomarker for acute myocardial infarction
Source: Aging (Albany NY). 2022 May 10;14(9):4085–106. doi: 10.18632/aging.204075 (PMC9134965; doi:10.18632/aging.204075)
Supplement: Supplementary Table 10 [file aging-14-204075-s011.xls]

## Sheet: Supplementary Table10
Supplementary Table 10. All of miRNAs that were predicted to bind to the JAK2, CDC42 or CHUK genes.
miRNAid	miRNAname	geneID	geneName	geneType	chromosome	narrowStart	narrowEnd	broadStart	broadEnd	strand	clipExpNum	degraExpNum	RBP	PITA	RNA22	miRmap	microT	miRanda	PicTar	TargetScan	pancancerNum
MIMAT0000068	hsa-miR-15a-5p	ENSG00000096968	JAK2	protein_coding	chr9	5127661	5127666	5127661	5127666	+	3	0	AGO1-4,AGO2	1	0	0	0	0	0	0	5
MIMAT0000069	hsa-miR-16-5p	ENSG00000096968	JAK2	protein_coding	chr9	5127661	5127666	5127661	5127666	+	3	0	AGO1-4,AGO2	1	0	0	0	0	0	0	6
MIMAT0000076	hsa-miR-21-5p	ENSG00000096968	JAK2	protein_coding	chr9	5127719	5127724	5127719	5127724	+	2	0	AGO1-4	1	0	0	0	0	0	0	2
MIMAT0000081	hsa-miR-25-3p	ENSG00000096968	JAK2	protein_coding	chr9	5127126	5127131	5127111	5127132	+	3	0	AGO1-4,AGO2	1	0	0	0	1	0	0	14
MIMAT0000090	hsa-miR-32-5p	ENSG00000096968	JAK2	protein_coding	chr9	5127126	5127131	5127108	5127132	+	3	0	AGO1-4,AGO2	1	0	0	0	1	0	0	11
MIMAT0000092	hsa-miR-92a-3p	ENSG00000096968	JAK2	protein_coding	chr9	5127126	5127131	5127111	5127132	+	3	0	AGO1-4,AGO2	1	0	0	0	1	0	0	18
MIMAT0000095	hsa-miR-96-5p	ENSG00000096968	JAK2	protein_coding	chr9	5127670	5127675	5127670	5127675	+	3	0	AGO1-4,AGO2	1	0	0	0	0	0	0	18
MIMAT0000099	hsa-miR-101-3p	ENSG00000096968	JAK2	protein_coding	chr9	5127238	5127243	5127216	5127244	+	3	0	AGO1-4	1	0	1	1	1	0	0	1
MIMAT0000099	hsa-miR-105-5p	ENSG00000096968	JAK2	protein_coding	chr9	5127400	5127406	5127379	5127407	+	5	0	AGO1-4,AGO2	1	0	1	1	1	0	1	1
MIMAT0000102	hsa-miR-197-3p	ENSG00000096968	JAK2	protein_coding	chr9	5081810	5081838	5081810	5081838	+	2	0	AGO1,AGO1-4	0	0	0	1	0	0	0	9
MIMAT0000227	hsa-miR-147a	ENSG00000096968	JAK2	protein_coding	chr9	5127547	5127553	5127526	5127554	+	2	0	AGO1-4,AGO2	1	0	1	1	1	0	0	11
MIMAT0000251	hsa-miR-34a-5p	ENSG00000096968	JAK2	protein_coding	chr9	5127212	5127217	5127212	5127217	+	2	0	AGO1-4	1	0	0	0	0	0	0	0
MIMAT0000255	hsa-miR-181a-5p	ENSG00000096968	JAK2	protein_coding	chr9	5127668	5127673	5127668	5127673	+	3	0	AGO1-4,AGO2	1	0	0	0	0	0	0	10
MIMAT0000256	hsa-miR-181b-5p	ENSG00000096968	JAK2	protein_coding	chr9	5127551	5127557	5127535	5127558	+	1	0	AGO1-4	1	0	0	0	1	0	0	7
MIMAT0000257	hsa-miR-181c-5p	ENSG00000096968	JAK2	protein_coding	chr9	5127551	5127557	5127535	5127558	+	1	0	AGO1-4	1	0	0	0	1	0	0	11
MIMAT0000258	hsa-miR-182-5p	ENSG00000096968	JAK2	protein_coding	chr9	5127551	5127557	5127535	5127558	+	1	0	AGO1-4	1	0	0	0	1	0	0	2
MIMAT0000259	hsa-miR-204-5p	ENSG00000096968	JAK2	protein_coding	chr9	5127670	5127675	5127670	5127675	+	3	0	AGO1-4,AGO2	1	0	0	0	0	0	0	16
MIMAT0000265	hsa-miR-211-5p	ENSG00000096968	JAK2	protein_coding	chr9	5127422	5127428	5127408	5127429	+	5	0	AGO1-4,AGO2	1	0	1	0	1	0	1	2
MIMAT0000268	hsa-miR-212-3p	ENSG00000096968	JAK2	protein_coding	chr9	5127422	5127428	5127408	5127429	+	5	0	AGO1-4,AGO2	1	0	1	0	1	0	1	3
MIMAT0000269	hsa-miR-214-3p	ENSG00000096968	JAK2	protein_coding	chr9	5127239	5127244	5127239	5127244	+	3	0	AGO1-4	1	0	0	0	0	0	0	1
MIMAT0000271	hsa-miR-216a-5p	ENSG00000096968	JAK2	protein_coding	chr9	5127662	5127667	5127662	5127667	+	3	0	AGO1-4,AGO2	1	0	0	0	0	0	0	6
MIMAT0000273	hsa-miR-15b-5p	ENSG00000096968	JAK2	protein_coding	chr9	5127625	5127630	5127603	5127631	+	3	0	AGO1-4,AGO2	1	0	1	1	1	1	1	1
MIMAT0000417	hsa-miR-132-3p	ENSG00000096968	JAK2	protein_coding	chr9	5127661	5127666	5127661	5127666	+	3	0	AGO1-4,AGO2	1	0	0	0	0	0	0	9
MIMAT0000426	hsa-miR-135a-5p	ENSG00000096968	JAK2	protein_coding	chr9	5127239	5127244	5127239	5127244	+	3	0	AGO1-4	1	0	0	0	0	0	0	1
MIMAT0000428	hsa-miR-144-3p	ENSG00000096968	JAK2	protein_coding	chr9	5127727	5127732	5127705	5127733	+	2	0	AGO1-4	1	0	1	1	1	1	1	6
MIMAT0000436	hsa-miR-186-5p	ENSG00000096968	JAK2	protein_coding	chr9	5127237	5127243	5127216	5127244	+	3	0	AGO1-4	1	0	1	1	1	0	0	4
MIMAT0000436	hsa-miR-193a-3p	ENSG00000096968	JAK2	protein_coding	chr9	5127401	5127406	5127379	5127407	+	5	0	AGO1-4,AGO2	1	0	1	1	1	0	1	4
MIMAT0000456	hsa-miR-195-5p	ENSG00000096968	JAK2	protein_coding	chr9	5127610	5127615	5127610	5127615	+	2	0	AGO1-4	1	0	0	0	0	0	0	7
MIMAT0000459	hsa-miR-320a	ENSG00000096968	JAK2	protein_coding	chr9	5127929	5127934	5127914	5127935	+	1	0	AGO2	1	0	0	0	1	0	0	5
MIMAT0000461	hsa-miR-155-5p	ENSG00000096968	JAK2	protein_coding	chr9	5127661	5127666	5127661	5127666	+	3	0	AGO1-4,AGO2	1	0	0	0	0	0	0	1
MIMAT0000510	hsa-miR-34c-5p	ENSG00000096968	JAK2	protein_coding	chr9	5127088	5127094	5127067	5127095	+	3	0	AGO1-4,AGO2	1	0	1	1	1	0	0	7
MIMAT0000646	hsa-miR-363-3p	ENSG00000096968	JAK2	protein_coding	chr9	5127359	5127365	5127343	5127366	+	2	0	AGO1-4	1	0	0	0	1	0	0	0
MIMAT0000686	hsa-miR-367-3p	ENSG00000096968	JAK2	protein_coding	chr9	5127668	5127673	5127668	5127673	+	3	0	AGO1-4,AGO2	1	0	0	0	0	0	0	6
MIMAT0000707	hsa-miR-369-3p	ENSG00000096968	JAK2	protein_coding	chr9	5127126	5127131	5127111	5127132	+	3	0	AGO1-4,AGO2	1	0	0	0	1	0	0	8
MIMAT0000719	hsa-miR-370-3p	ENSG00000096968	JAK2	protein_coding	chr9	5127126	5127131	5127108	5127132	+	3	0	AGO1-4,AGO2	1	0	0	0	1	0	0	1
MIMAT0000721	hsa-miR-374a-5p	ENSG00000096968	JAK2	protein_coding	chr9	5126864	5126869	5126842	5126888	+	1	0	AGO1	1	0	1	3	0	0	0	7
MIMAT0000721	hsa-miR-375	ENSG00000096968	JAK2	protein_coding	chr9	5126882	5126887	5126882	5126887	+	1	0	AGO1	1	0	1	0	0	0	0	7
MIMAT0000721	hsa-miR-376a-3p	ENSG00000096968	JAK2	protein_coding	chr9	5127112	5127117	5127090	5127118	+	3	0	AGO1-4,AGO2	1	0	1	1	0	0	0	7
MIMAT0000721	hsa-miR-377-3p	ENSG00000096968	JAK2	protein_coding	chr9	5127521	5127526	5127499	5127527	+	2	0	AGO1-4,AGO2	1	0	1	1	0	0	0	7
MIMAT0000722	hsa-miR-380-3p	ENSG00000096968	JAK2	protein_coding	chr9	5127368	5127373	5127368	5127373	+	2	0	AGO1-4	1	0	1	0	0	0	0	6
MIMAT0000722	hsa-miR-381-3p	ENSG00000096968	JAK2	protein_coding	chr9	5127781	5127787	5127767	5127788	+	1	0	AGO1-4	1	0	1	0	1	0	0	6
MIMAT0000727	hsa-miR-337-3p	ENSG00000096968	JAK2	protein_coding	chr9	5054788	5054816	5054788	5054816	+	2	0	AGO1-4	0	0	0	1	0	0	0	3
MIMAT0000727	hsa-miR-135b-5p	ENSG00000096968	JAK2	protein_coding	chr9	5064919	5064947	5064919	5064947	+	4	0	AGO1-4	0	0	0	1	0	0	0	3
MIMAT0000727	hsa-miR-335-5p	ENSG00000096968	JAK2	protein_coding	chr9	5126882	5126888	5126861	5126889	+	1	0	AGO1	1	0	0	1	1	0	0	3
MIMAT0000727	hsa-miR-384	ENSG00000096968	JAK2	protein_coding	chr9	5127362	5127367	5127340	5127368	+	2	0	AGO1-4	1	0	0	1	0	0	0	3
MIMAT0000728	hsa-miR-424-5p	ENSG00000096968	JAK2	protein_coding	chr9	5127427	5127432	5127405	5127433	+	5	0	AGO1-4,AGO2	1	0	0	1	1	0	1	9
MIMAT0000729	hsa-miR-449a	ENSG00000096968	JAK2	protein_coding	chr9	5127584	5127604	5127584	5127604	+	2	0	AGO1-4	0	0	0	0	1	0	0	8
MIMAT0000730	hsa-miR-433-3p	ENSG00000096968	JAK2	protein_coding	chr9	5127197	5127204	5127183	5127205	+	2	0	AGO1-4	1	0	0	0	1	0	0	4
MIMAT0000735	hsa-miR-452-5p	ENSG00000096968	JAK2	protein_coding	chr9	5126867	5126874	5126847	5126875	+	1	0	AGO1	1	0	0	1	0	0	0	6
MIMAT0000736	hsa-miR-409-3p	ENSG00000096968	JAK2	protein_coding	chr9	5077495	5077523	5077495	5077523	+	4	0	AGO1-4,AGO2	0	0	0	1	0	0	0	3
MIMAT0000736	hsa-miR-410-3p	ENSG00000096968	JAK2	protein_coding	chr9	5127447	5127452	5127425	5127453	+	3	0	AGO1-4,AGO2	1	0	0	1	1	0	0	3
MIMAT0000736	hsa-miR-376b-3p	ENSG00000096968	JAK2	protein_coding	chr9	5127534	5127540	5127513	5127541	+	2	0	AGO1-4,AGO2	1	0	0	1	1	0	1	3
MIMAT0000754	hsa-miR-490-3p	ENSG00000096968	JAK2	protein_coding	chr9	5127450	5127456	5127450	5127456	+	1	0	AGO1-4	1	0	0	0	0	0	0	11
MIMAT0000758	hsa-miR-193b-3p	ENSG00000096968	JAK2	protein_coding	chr9	5127726	5127732	5127705	5127733	+	2	0	AGO1-4	1	0	1	1	1	0	1	9
MIMAT0000765	hsa-miR-497-5p	ENSG00000096968	JAK2	protein_coding	chr9	5127048	5127053	5127048	5127053	+	1	0	AGO1-4	1	0	0	0	0	0	0	10
MIMAT0001075	hsa-miR-181d-5p	ENSG00000096968	JAK2	protein_coding	chr9	5127452	5127457	5127439	5127458	+	1	0	AGO1-4	1	0	0	0	1	0	0	0
MIMAT0001341	hsa-miR-526b-5p	ENSG00000096968	JAK2	protein_coding	chr9	5022173	5022201	5022173	5022201	+	1	0	AGO1-4	0	0	0	1	0	0	0	8
MIMAT0001341	hsa-miR-524-5p	ENSG00000096968	JAK2	protein_coding	chr9	5127661	5127666	5127639	5127667	+	3	0	AGO1-4,AGO2	1	0	0	1	0	0	0	8
MIMAT0001541	hsa-miR-520d-5p	ENSG00000096968	JAK2	protein_coding	chr9	5127668	5127673	5127668	5127673	+	3	0	AGO1-4,AGO2	1	0	0	0	0	0	0	3
MIMAT0001627	hsa-miR-503-5p	ENSG00000096968	JAK2	protein_coding	chr9	5126878	5126899	5126871	5126899	+	1	0	AGO1	0	0	0	1	1	0	0	5
MIMAT0001627	hsa-miR-493-3p	ENSG00000096968	JAK2	protein_coding	chr9	5126961	5126966	5126939	5126967	+	1	0	AGO2	1	0	1	1	0	0	0	5
MIMAT0001627	hsa-miR-92b-3p	ENSG00000096968	JAK2	protein_coding	chr9	5127705	5127710	5127683	5127711	+	2	0	AGO1-4	1	0	1	1	0	0	0	5
MIMAT0001635	hsa-miR-556-5p	ENSG00000096968	JAK2	protein_coding	chr9	5127603	5127608	5127603	5127608	+	2	0	AGO1-4	1	0	0	0	0	0	0	8
MIMAT0001639	hsa-miR-579-3p	ENSG00000096968	JAK2	protein_coding	chr9	5127677	5127682	5127677	5127682	+	2	0	AGO1-4	1	0	0	0	0	0	0	6
MIMAT0002171	hsa-miR-582-5p	ENSG00000096968	JAK2	protein_coding	chr9	5126870	5126890	5126862	5126890	+	1	0	AGO1	0	0	0	1	1	0	0	8
MIMAT0002171	hsa-miR-588	ENSG00000096968	JAK2	protein_coding	chr9	5127345	5127350	5127323	5127351	+	2	0	AGO1-4,AGO2	1	0	0	1	0	0	0	8
MIMAT0002172	hsa-miR-590-5p	ENSG00000096968	JAK2	protein_coding	chr9	5127583	5127604	5127583	5127604	+	2	0	AGO1-4	0	0	0	0	1	0	0	7
MIMAT0002806	hsa-miR-620	ENSG00000096968	JAK2	protein_coding	chr9	5127784	5127789	5127769	5127790	+	1	0	AGO1-4	1	0	0	0	1	0	0	3
MIMAT0002819	hsa-miR-449b-5p	ENSG00000096968	JAK2	protein_coding	chr9	5127929	5127934	5127914	5127935	+	1	0	AGO2	1	0	0	0	1	0	0	11
MIMAT0002820	hsa-miR-425-5p	ENSG00000096968	JAK2	protein_coding	chr9	5127661	5127666	5127661	5127666	+	3	0	AGO1-4,AGO2	1	0	0	0	0	0	0	2
MIMAT0002821	hsa-miR-28-3p	ENSG00000096968	JAK2	protein_coding	chr9	5127551	5127557	5127535	5127558	+	1	0	AGO1-4	1	0	0	0	1	0	0	6
MIMAT0002835	hsa-miR-140-3p	ENSG00000096968	JAK2	protein_coding	chr9	5127921	5127926	5127921	5127926	+	1	0	AGO2	1	0	0	0	0	0	0	6
MIMAT0002849	hsa-miR-129-2-3p	ENSG00000096968	JAK2	protein_coding	chr9	5127446	5127451	5127446	5127451	+	1	0	AGO1-4	1	0	0	0	0	0	0	4
MIMAT0002855	hsa-miR-371a-5p	ENSG00000096968	JAK2	protein_coding	chr9	5127446	5127451	5127446	5127451	+	1	0	AGO1-4	1	0	0	0	0	0	0	4
MIMAT0002874	hsa-miR-379-3p	ENSG00000096968	JAK2	protein_coding	chr9	5127661	5127666	5127661	5127666	+	3	0	AGO1-4,AGO2	1	0	0	0	0	0	0	6
MIMAT0003161	hsa-miR-340-5p	ENSG00000096968	JAK2	protein_coding	chr9	5126783	5126806	5126783	5126806	+	1	0	AGO2	0	1	0	0	0	0	0	6
MIMAT0003218	hsa-miR-624-3p	ENSG00000096968	JAK2	protein_coding	chr9	5127126	5127131	5127111	5127132	+	3	0	AGO1-4,AGO2	1	0	0	0	1	0	0	6
MIMAT0003220	hsa-miR-654-3p	ENSG00000096968	JAK2	protein_coding	chr9	5127703	5127708	5127703	5127708	+	2	0	AGO1-4	1	0	1	0	0	0	0	10
MIMAT0003220	hsa-miR-300	ENSG00000096968	JAK2	protein_coding	chr9	5127765	5127771	5127765	5127771	+	1	0	AGO1-4	1	0	1	0	0	0	0	10
MIMAT0003244	hsa-miR-543	ENSG00000096968	JAK2	protein_coding	chr9	5055718	5055746	5055718	5055746	+	2	0	AGO1-4	0	0	0	1	0	0	0	4
MIMAT0003244	hsa-miR-374b-5p	ENSG00000096968	JAK2	protein_coding	chr9	5127487	5127492	5127465	5127493	+	1	0	AGO1-4	1	0	1	1	0	0	0	4
MIMAT0003247	hsa-miR-216b-5p	ENSG00000096968	JAK2	protein_coding	chr9	5127402	5127407	5127380	5127408	+	5	0	AGO1-4,AGO2	1	0	0	1	0	0	1	8
MIMAT0003255	hsa-miR-944	ENSG00000096968	JAK2	protein_coding	chr9	5127354	5127359	5127354	5127359	+	2	0	AGO1-4	1	0	0	0	0	0	0	0
MIMAT0003258	hsa-miR-513c-5p	ENSG00000096968	JAK2	protein_coding	chr9	5127719	5127724	5127719	5127724	+	2	0	AGO1-4	1	0	0	0	0	0	0	16
MIMAT0003289	hsa-miR-320b	ENSG00000096968	JAK2	protein_coding	chr9	5127575	5127581	5127554	5127582	+	1	0	AGO1-4	1	0	1	1	0	0	0	0
MIMAT0003327	hsa-miR-320c	ENSG00000096968	JAK2	protein_coding	chr9	5127668	5127673	5127668	5127673	+	3	0	AGO1-4,AGO2	1	0	0	0	0	0	0	3
MIMAT0003393	hsa-miR-1323	ENSG00000096968	JAK2	protein_coding	chr9	5127648	5127653	5127648	5127653	+	3	0	AGO1-4,AGO2	1	0	0	0	0	0	0	12
MIMAT0004502	hsa-miR-1271-5p	ENSG00000096968	JAK2	protein_coding	chr9	5127436	5127441	5127436	5127441	+	1	0	AGO1-4	1	0	0	0	0	0	0	5
MIMAT0004597	hsa-miR-1270	ENSG00000096968	JAK2	protein_coding	chr9	5127546	5127551	5127546	5127551	+	1	0	AGO1-4	1	0	0	0	0	0	0	3
MIMAT0004605	hsa-miR-1197	ENSG00000096968	JAK2	protein_coding	chr9	5127218	5127225	5127218	5127225	+	3	0	AGO1-4	1	0	0	0	0	0	0	4
MIMAT0004687	hsa-miR-320d	ENSG00000096968	JAK2	protein_coding	chr9	5127094	5127099	5127094	5127099	+	3	0	AGO1-4,AGO2	1	0	1	0	0	0	0	1
MIMAT0004687	hsa-miR-3121-3p	ENSG00000096968	JAK2	protein_coding	chr9	5127622	5127627	5127609	5127628	+	3	0	AGO1-4,AGO2	1	0	1	0	1	1	0	1
MIMAT0004687	hsa-miR-3163	ENSG00000096968	JAK2	protein_coding	chr9	5127656	5127661	5127656	5127661	+	3	0	AGO1-4,AGO2	1	0	1	0	0	0	0	1
MIMAT0004690	hsa-miR-514b-5p	ENSG00000096968	JAK2	protein_coding	chr9	5126847	5126875	5126847	5126875	+	1	0	AGO1	0	0	0	1	0	0	0	4
MIMAT0004692	hsa-miR-3611	ENSG00000096968	JAK2	protein_coding	chr9	5127344	5127349	5127344	5127349	+	1	0	AGO1-4	1	0	0	0	0	0	0	2
MIMAT0004807	hsa-miR-4429	ENSG00000096968	JAK2	protein_coding	chr9	5127533	5127538	5127533	5127538	+	1	0	AGO1-4	1	0	1	0	0	0	0	0
MIMAT0004814	hsa-miR-664b-3p	ENSG00000096968	JAK2	protein_coding	chr9	5126980	5126985	5126980	5126985	+	1	0	AGO2	1	0	0	0	0	0	0	10
MIMAT0004903	hsa-miR-1277-5p	ENSG00000096968	JAK2	protein_coding	chr9	5077495	5077523	5077495	5077523	+	4	0	AGO1-4,AGO2	0	0	0	1	0	0	0	0
MIMAT0004903	hsa-miR-642b-5p	ENSG00000096968	JAK2	protein_coding	chr9	5127447	5127452	5127425	5127453	+	3	0	AGO1-4,AGO2	1	0	0	1	1	1	0	0
MIMAT0004903	hsa-miR-6509-3p	ENSG00000096968	JAK2	protein_coding	chr9	5127534	5127540	5127513	5127541	+	2	0	AGO1-4,AGO2	1	0	0	1	1	1	1	0
MIMAT0000068	hsa-miR-15a-5p	ENSG00000070831	CDC42	protein_coding	chr1	22416551	22416554	22416534	22416557	+	7	0	AGO1,AGO2,AGO3	2	0	2	0	1	1	2	6
MIMAT0000068	hsa-miR-16-5p	ENSG00000070831	CDC42	protein_coding	chr1	22416740	22416746	22416726	22416747	+	1	0	AGO2	1	0	1	0	1	1	1	6
MIMAT0000068	hsa-miR-18a-5p	ENSG00000070831	CDC42	protein_coding	chr1	22418369	22418374	22418369	22418374	+	7	0	AGO1-4	1	0	0	0	0	0	0	6
MIMAT0000069	hsa-miR-19a-3p	ENSG00000070831	CDC42	protein_coding	chr1	22416552	22416554	22416538	22416558	+	7	0	AGO1,AGO2,AGO3	2	0	2	0	1	2	2	6
MIMAT0000069	hsa-miR-19b-3p	ENSG00000070831	CDC42	protein_coding	chr1	22416741	22416746	22416723	22416747	+	1	0	AGO2	1	0	1	0	1	1	1	6
MIMAT0000069	hsa-miR-22-3p	ENSG00000070831	CDC42	protein_coding	chr1	22418369	22418374	22418369	22418374	+	7	0	AGO1-4	1	0	0	0	0	0	0	6
MIMAT0000072	hsa-miR-23a-3p	ENSG00000070831	CDC42	protein_coding	chr1	22418847	22418853	22418826	22418854	+	7	0	AGO1,AGO1-4,AGO2	1	0	1	1	1	1	1	8
MIMAT0000072	hsa-miR-25-3p	ENSG00000070831	CDC42	protein_coding	chr1	22419321	22419326	22419299	22419327	+	4	0	AGO1,AGO1-4,AGO2	1	0	1	1	0	0	0	8
MIMAT0000073	hsa-miR-27a-3p	ENSG00000070831	CDC42	protein_coding	chr1	22418845	22418850	22418829	22418851	+	5	0	AGO1,AGO1-4,AGO2	1	0	0	0	1	0	0	12
MIMAT0000074	hsa-miR-29a-3p	ENSG00000070831	CDC42	protein_coding	chr1	22418845	22418850	22418829	22418851	+	5	0	AGO1,AGO1-4,AGO2	1	0	0	0	1	0	0	14
MIMAT0000077	hsa-miR-31-5p	ENSG00000070831	CDC42	protein_coding	chr1	22418938	22418943	22418938	22418943	+	9	0	AGO1,AGO1-4,AGO2	1	0	1	0	0	0	0	7
MIMAT0000077	hsa-miR-32-5p	ENSG00000070831	CDC42	protein_coding	chr1	22418969	22418974	22418969	22418974	+	14	0	AGO1,AGO1-4,AGO2	1	0	1	0	0	0	0	7
MIMAT0000078	hsa-miR-33a-5p	ENSG00000070831	CDC42	protein_coding	chr1	22418749	22418754	22418749	22418754	+	12	0	AGO1,AGO1-4,AGO2	1	0	0	0	0	0	0	3
MIMAT0000081	hsa-miR-92a-3p	ENSG00000070831	CDC42	protein_coding	chr1	22418107	22418112	22418085	22418113	+	12	1	AGO1,AGO1-4,AGO2	1	0	0	1	1	1	1	8
MIMAT0000084	hsa-miR-101-3p	ENSG00000070831	CDC42	protein_coding	chr1	22418754	22418760	22418739	22418761	+	14	0	AGO1,AGO1-4,AGO2	1	0	1	0	1	1	0	4
MIMAT0000086	hsa-miR-29b-3p	ENSG00000070831	CDC42	protein_coding	chr1	22404983	22405011	22404983	22405011	+	7	0	AGO1-4,AGO2	0	0	0	1	0	0	0	9
MIMAT0000086	hsa-miR-103a-3p	ENSG00000070831	CDC42	protein_coding	chr1	22418588	22418594	22418567	22418595	+	9	0	AGO1-4,AGO2	1	0	1	1	1	1	1	9
MIMAT0000086	hsa-miR-105-5p	ENSG00000070831	CDC42	protein_coding	chr1	22419007	22419013	22418986	22419014	+	16	0	AGO1-4,AGO2	1	0	1	1	1	0	1	9
MIMAT0000089	hsa-miR-107	ENSG00000070831	CDC42	protein_coding	chr1	22418716	22418723	22418706	22418724	+	13	0	AGO1,AGO1-4,AGO2	1	0	0	0	1	0	0	0
MIMAT0000090	hsa-miR-199a-3p	ENSG00000070831	CDC42	protein_coding	chr1	22418107	22418112	22418085	22418113	+	12	1	AGO1,AGO1-4,AGO2	1	0	0	1	1	1	1	8
MIMAT0000091	hsa-miR-208a-3p	ENSG00000070831	CDC42	protein_coding	chr1	22418857	22418862	22418857	22418862	+	4	0	AGO1-4,AGO2	1	0	1	0	0	0	0	11
MIMAT0000091	hsa-miR-129-5p	ENSG00000070831	CDC42	protein_coding	chr1	22418966	22418971	22418966	22418971	+	14	0	AGO1,AGO1-4,AGO2	1	0	1	0	0	0	0	11
MIMAT0000091	hsa-miR-139-5p	ENSG00000070831	CDC42	protein_coding	chr1	22419230	22419235	22419230	22419235	+	7	0	AGO1,AGO2	1	0	1	0	0	0	0	11
MIMAT0000092	hsa-miR-183-5p	ENSG00000070831	CDC42	protein_coding	chr1	22418107	22418112	22418085	22418113	+	12	1	AGO1,AGO1-4,AGO2	1	0	0	1	1	1	1	9
MIMAT0000099	hsa-miR-204-5p	ENSG00000070831	CDC42	protein_coding	chr1	22416569	22416574	22416569	22416575	+	2	0	AGO2	1	0	0	0	0	1	0	5
MIMAT0000100	hsa-miR-211-5p	ENSG00000070831	CDC42	protein_coding	chr1	22404983	22405011	22404983	22405011	+	7	0	AGO1-4,AGO2	0	0	0	1	0	0	0	16
MIMAT0000100	hsa-miR-214-3p	ENSG00000070831	CDC42	protein_coding	chr1	22418588	22418594	22418567	22418595	+	9	0	AGO1-4,AGO2	1	0	1	1	1	1	1	16
MIMAT0000100	hsa-miR-217	ENSG00000070831	CDC42	protein_coding	chr1	22419007	22419013	22418986	22419014	+	16	0	AGO1-4,AGO2	1	0	1	1	1	0	1	16
MIMAT0000101	hsa-miR-224-5p	ENSG00000070831	CDC42	protein_coding	chr1	22416551	22416553	22416548	22416556	+	7	0	AGO1,AGO2,AGO3	2	0	2	0	0	0	0	6
MIMAT0000101	hsa-miR-200b-3p	ENSG00000070831	CDC42	protein_coding	chr1	22416740	22416745	22416740	22416745	+	1	0	AGO2	1	0	1	0	0	0	0	6
MIMAT0000102	hsa-miR-1-3p	ENSG00000070831	CDC42	protein_coding	chr1	22417119	22417124	22417119	22417124	+	1	0	AGO2	1	0	0	0	0	0	0	3
MIMAT0000102	hsa-miR-15b-5p	ENSG00000070831	CDC42	protein_coding	chr1	22418771	22418776	22418771	22418776	+	8	0	AGO1-4	1	0	1	0	0	0	0	3
MIMAT0000102	hsa-miR-23b-3p	ENSG00000070831	CDC42	protein_coding	chr1	22418782	22418787	22418782	22418787	+	6	0	AGO1-4	1	0	1	0	0	0	0	3
MIMAT0000104	hsa-miR-27b-3p	ENSG00000070831	CDC42	protein_coding	chr1	22416551	22416553	22416548	22416556	+	7	0	AGO1,AGO2,AGO3	2	0	2	0	0	0	0	4
MIMAT0000104	hsa-miR-124-3p	ENSG00000070831	CDC42	protein_coding	chr1	22416740	22416745	22416740	22416745	+	1	0	AGO2	1	0	1	0	0	0	0	4
MIMAT0000232	hsa-miR-128-3p	ENSG00000070831	CDC42	protein_coding	chr1	22416567	22416573	22416567	22416573	+	2	0	AGO2	1	0	1	0	0	1	1	6
MIMAT0000232	hsa-miR-130a-3p	ENSG00000070831	CDC42	protein_coding	chr1	22417102	22417107	22417102	22417107	+	2	0	AGO2	1	0	1	0	0	0	0	6
MIMAT0000241	hsa-miR-137	ENSG00000070831	CDC42	protein_coding	chr1	22418912	22418919	22418912	22418919	+	5	0	AGO1-4,AGO2	1	0	0	0	0	0	0	1
MIMAT0000242	hsa-miR-141-3p	ENSG00000070831	CDC42	protein_coding	chr1	22418260	22418265	22418246	22418266	+	2	0	AGO1-4,AGO2	1	0	0	0	1	0	0	9
MIMAT0000242	hsa-miR-142-5p	ENSG00000070831	CDC42	protein_coding	chr1	22419424	22419429	22419424	22419429	+	4	0	AGO1,AGO1-4,AGO2	1	0	0	0	0	0	0	9
MIMAT0000250	hsa-miR-142-3p	ENSG00000070831	CDC42	protein_coding	chr1	22416570	22416576	22416556	22416577	+	4	0	AGO1,AGO2	1	0	1	0	1	1	1	7
MIMAT0000261	hsa-miR-144-3p	ENSG00000070831	CDC42	protein_coding	chr1	22418779	22418784	22418779	22418784	+	6	0	AGO1-4	1	0	0	0	0	0	0	8
MIMAT0000265	hsa-miR-153-3p	ENSG00000070831	CDC42	protein_coding	chr1	22416980	22416985	22416980	22416986	+	2	0	AGO2	1	0	1	0	0	1	0	7
MIMAT0000268	hsa-miR-136-5p	ENSG00000070831	CDC42	protein_coding	chr1	22416980	22416985	22416980	22416986	+	2	0	AGO2	1	0	1	0	0	1	0	3
MIMAT0000271	hsa-miR-149-5p	ENSG00000070831	CDC42	protein_coding	chr1	22416550	22416555	22416537	22416556	+	7	0	AGO1,AGO2,AGO3	1	0	1	0	1	0	0	1
MIMAT0000271	hsa-miR-185-5p	ENSG00000070831	CDC42	protein_coding	chr1	22416739	22416744	22416739	22416744	+	1	0	AGO2	1	0	1	0	0	0	0	1
MIMAT0000274	hsa-miR-186-5p	ENSG00000070831	CDC42	protein_coding	chr1	22419281	22419286	22419281	22419286	+	3	0	AGO1-4,AGO2	1	0	0	0	0	0	0	6
MIMAT0000281	hsa-miR-188-5p	ENSG00000070831	CDC42	protein_coding	chr1	22418757	22418763	22418745	22418764	+	13	0	AGO1,AGO1-4,AGO2	1	0	0	0	1	0	0	4
MIMAT0000318	hsa-miR-194-5p	ENSG00000070831	CDC42	protein_coding	chr1	22418679	22418685	22418658	22418686	+	5	0	AGO1-4	1	0	0	1	1	0	0	0
MIMAT0000318	hsa-miR-195-5p	ENSG00000070831	CDC42	protein_coding	chr1	22418841	22418846	22418819	22418847	+	7	0	AGO1,AGO1-4,AGO2	1	0	0	1	0	0	0	0
MIMAT0000416	hsa-miR-206	ENSG00000070831	CDC42	protein_coding	chr1	22418544	22418550	22418529	22418551	+	11	0	AGO1,AGO1-4,AGO2	1	0	0	0	1	1	1	5
MIMAT0000417	hsa-miR-320a	ENSG00000070831	CDC42	protein_coding	chr1	22416551	22416554	22416534	22416557	+	7	0	AGO1,AGO2,AGO3	2	0	2	0	1	1	2	9
MIMAT0000417	hsa-miR-200c-3p	ENSG00000070831	CDC42	protein_coding	chr1	22416740	22416746	22416726	22416747	+	1	0	AGO2	1	0	1	0	1	1	1	9
MIMAT0000417	hsa-miR-155-5p	ENSG00000070831	CDC42	protein_coding	chr1	22418369	22418374	22418369	22418374	+	7	0	AGO1-4	1	0	0	0	0	0	0	9
MIMAT0000418	hsa-miR-29c-3p	ENSG00000070831	CDC42	protein_coding	chr1	22418749	22418754	22418749	22418754	+	12	0	AGO1,AGO1-4,AGO2	1	0	0	0	0	0	0	7
MIMAT0000419	hsa-miR-200a-3p	ENSG00000070831	CDC42	protein_coding	chr1	22418754	22418760	22418739	22418761	+	14	0	AGO1,AGO1-4,AGO2	1	0	1	0	1	1	0	5
MIMAT0000422	hsa-miR-299-3p	ENSG00000070831	CDC42	protein_coding	chr1	22418650	22418655	22418650	22418655	+	5	0	AGO1-4	1	0	0	0	0	0	0	4
MIMAT0000424	hsa-miR-301a-3p	ENSG00000070831	CDC42	protein_coding	chr1	22418754	22418759	22418754	22418760	+	10	0	AGO1-4,AGO2	1	0	0	0	0	1	0	5
MIMAT0000425	hsa-miR-130b-3p	ENSG00000070831	CDC42	protein_coding	chr1	22418141	22418146	22418141	22418146	+	22	0	AGO1,AGO1-4,AGO2,AGO3,AGO4	1	0	0	0	0	0	0	10
MIMAT0000429	hsa-miR-361-5p	ENSG00000070831	CDC42	protein_coding	chr1	22417926	22417954	22417926	22417954	+	11	0	AGO1-4,AGO2	0	0	0	1	0	0	0	4
MIMAT0000429	hsa-miR-363-3p	ENSG00000070831	CDC42	protein_coding	chr1	22418108	22418113	22418086	22418114	+	13	1	AGO1,AGO1-4,AGO2	1	0	0	1	1	1	1	4
MIMAT0000432	hsa-miR-367-3p	ENSG00000070831	CDC42	protein_coding	chr1	22418412	22418417	22418390	22418418	+	9	0	AGO1,AGO1-4,AGO2	1	0	1	1	0	0	0	10
MIMAT0000432	hsa-miR-377-3p	ENSG00000070831	CDC42	protein_coding	chr1	22419247	22419252	22419225	22419253	+	9	0	AGO1,AGO1-4,AGO2	1	0	1	1	1	1	1	10
MIMAT0000432	hsa-miR-380-3p	ENSG00000070831	CDC42	protein_coding	chr1	22419354	22419359	22419332	22419360	+	4	0	AGO1,AGO1-4,AGO2	1	0	1	1	0	0	0	10
MIMAT0000433	hsa-miR-381-3p	ENSG00000070831	CDC42	protein_coding	chr1	22417108	22417113	22417106	22417114	+	2	0	AGO2	1	0	1	0	0	1	0	3
MIMAT0000434	hsa-miR-330-3p	ENSG00000070831	CDC42	protein_coding	chr1	22416566	22416571	22416566	22416571	+	2	0	AGO2	1	0	0	0	0	0	0	6
MIMAT0000436	hsa-miR-342-3p	ENSG00000070831	CDC42	protein_coding	chr1	22416569	22416574	22416569	22416575	+	2	0	AGO2	1	0	0	0	0	1	0	1
MIMAT0000439	hsa-miR-325	ENSG00000070831	CDC42	protein_coding	chr1	22419394	22419399	22419372	22419400	+	5	0	AGO1,AGO1-4,AGO2	1	0	0	1	1	0	0	4
MIMAT0000448	hsa-miR-345-5p	ENSG00000070831	CDC42	protein_coding	chr1	22419062	22419067	22419062	22419067	+	11	0	AGO1,AGO1-4,AGO2	1	0	0	0	0	0	0	6
MIMAT0000450	hsa-miR-346	ENSG00000070831	CDC42	protein_coding	chr1	22419183	22419188	22419183	22419188	+	1	0	AGO2	1	0	0	0	0	0	0	6
MIMAT0000455	hsa-miR-384	ENSG00000070831	CDC42	protein_coding	chr1	22412986	22413014	22412986	22413014	+	5	0	AGO1-4,AGO2	0	0	0	1	0	0	0	4
MIMAT0000455	hsa-miR-424-5p	ENSG00000070831	CDC42	protein_coding	chr1	22418014	22418020	22418011	22418021	+	20	0	AGO1-4,AGO2	0	0	0	0	1	1	0	4
MIMAT0000455	hsa-miR-18b-5p	ENSG00000070831	CDC42	protein_coding	chr1	22418657	22418663	22418636	22418664	+	9	0	AGO1,AGO1-4,AGO2	1	0	1	1	1	1	1	4
MIMAT0000456	hsa-miR-448	ENSG00000070831	CDC42	protein_coding	chr1	22416543	22416548	22416543	22416548	+	7	0	AGO1,AGO2,AGO3	1	0	0	0	0	0	0	6
MIMAT0000456	hsa-miR-429	ENSG00000070831	CDC42	protein_coding	chr1	22416988	22416994	22416974	22416995	+	2	0	AGO2	1	0	0	0	1	0	0	6
MIMAT0000456	hsa-miR-433-3p	ENSG00000070831	CDC42	protein_coding	chr1	22418817	22418822	22418795	22418823	+	7	0	AGO1,AGO1-4,AGO2	1	0	1	1	0	1	0	6
MIMAT0000456	hsa-miR-329-3p	ENSG00000070831	CDC42	protein_coding	chr1	22419385	22419390	22419363	22419406	+	5	0	AGO1,AGO1-4,AGO2	1	0	1	2	2	0	0	6
MIMAT0000456	hsa-miR-410-3p	ENSG00000070831	CDC42	protein_coding	chr1	22419399	22419405	22419399	22419405	+	3	0	AGO1,AGO1-4	1	0	1	0	0	0	1	6
MIMAT0000457	hsa-miR-494-3p	ENSG00000070831	CDC42	protein_coding	chr1	22419256	22419261	22419256	22419261	+	5	0	AGO1-4,AGO2	1	0	0	0	0	0	0	4
MIMAT0000460	hsa-miR-495-3p	ENSG00000070831	CDC42	protein_coding	chr1	22417123	22417128	22417107	22417129	+	2	0	AGO2	1	0	0	0	1	0	0	10
MIMAT0000461	hsa-miR-496	ENSG00000070831	CDC42	protein_coding	chr1	22416551	22416554	22416535	22416557	+	7	0	AGO1,AGO2,AGO3	2	0	2	0	1	1	2	5
MIMAT0000461	hsa-miR-497-5p	ENSG00000070831	CDC42	protein_coding	chr1	22416740	22416746	22416727	22416747	+	1	0	AGO2	1	0	1	0	1	1	1	5
MIMAT0000461	hsa-miR-515-5p	ENSG00000070831	CDC42	protein_coding	chr1	22418369	22418374	22418369	22418374	+	7	0	AGO1-4	1	0	0	0	0	0	0	5
MIMAT0000462	hsa-miR-520a-5p	ENSG00000070831	CDC42	protein_coding	chr1	22418544	22418550	22418529	22418551	+	11	0	AGO1,AGO1-4,AGO2	1	0	0	0	1	1	1	2
MIMAT0000510	hsa-miR-525-5p	ENSG00000070831	CDC42	protein_coding	chr1	22416766	22416771	22416766	22416771	+	1	0	AGO2	1	0	0	0	0	0	0	6
MIMAT0000617	hsa-miR-524-5p	ENSG00000070831	CDC42	protein_coding	chr1	22418679	22418685	22418658	22418686	+	5	0	AGO1-4	1	0	0	1	1	0	0	7
MIMAT0000617	hsa-miR-520d-5p	ENSG00000070831	CDC42	protein_coding	chr1	22418841	22418846	22418819	22418847	+	7	0	AGO1,AGO1-4,AGO2	1	0	0	1	0	0	0	7
MIMAT0000646	hsa-miR-520g-3p	ENSG00000070831	CDC42	protein_coding	chr1	22419349	22419354	22419349	22419354	+	2	0	AGO1-4,AGO2	1	0	0	0	0	0	0	1
MIMAT0000681	hsa-miR-520h	ENSG00000070831	CDC42	protein_coding	chr1	22404983	22405011	22404983	22405011	+	7	0	AGO1-4,AGO2	0	0	0	1	0	0	0	10
MIMAT0000681	hsa-miR-522-3p	ENSG00000070831	CDC42	protein_coding	chr1	22418589	22418594	22418567	22418595	+	9	0	AGO1-4,AGO2	1	0	1	1	1	1	1	10
MIMAT0000681	hsa-miR-499a-5p	ENSG00000070831	CDC42	protein_coding	chr1	22419007	22419013	22418986	22419014	+	16	0	AGO1-4,AGO2	1	0	1	1	1	0	1	10
MIMAT0000682	hsa-miR-503-5p	ENSG00000070831	CDC42	protein_coding	chr1	22418412	22418417	22418390	22418418	+	9	0	AGO1,AGO1-4,AGO2	1	0	1	1	0	0	0	1
MIMAT0000682	hsa-miR-513a-5p	ENSG00000070831	CDC42	protein_coding	chr1	22419247	22419252	22419225	22419253	+	9	0	AGO1,AGO1-4,AGO2	1	0	1	1	1	1	1	1
MIMAT0000682	hsa-miR-506-3p	ENSG00000070831	CDC42	protein_coding	chr1	22419354	22419359	22419332	22419360	+	4	0	AGO1,AGO1-4,AGO2	1	0	1	1	0	0	0	1
MIMAT0000687	hsa-miR-532-5p	ENSG00000070831	CDC42	protein_coding	chr1	22418135	22418141	22418121	22418142	+	25	0	AGO1,AGO1-4,AGO2,AGO3,AGO4	1	0	1	0	1	1	0	0
MIMAT0000687	hsa-miR-493-3p	ENSG00000070831	CDC42	protein_coding	chr1	22418542	22418547	22418540	22418547	+	11	0	AGO1,AGO1-4,AGO2	1	0	1	0	0	0	0	0
MIMAT0000688	hsa-miR-545-3p	ENSG00000070831	CDC42	protein_coding	chr1	22418141	22418146	22418141	22418146	+	22	0	AGO1,AGO1-4,AGO2,AGO3,AGO4	1	0	0	0	0	0	0	10
MIMAT0000691	hsa-miR-552-3p	ENSG00000070831	CDC42	protein_coding	chr1	22418141	22418146	22418141	22418146	+	22	0	AGO1,AGO1-4,AGO2,AGO3,AGO4	1	0	0	0	0	0	0	3
MIMAT0000703	hsa-miR-92b-3p	ENSG00000070831	CDC42	protein_coding	chr1	22418825	22418830	22418810	22418831	+	7	0	AGO1,AGO1-4,AGO2	1	0	0	0	1	0	0	10
MIMAT0000707	hsa-miR-576-5p	ENSG00000070831	CDC42	protein_coding	chr1	22418107	22418112	22418092	22418113	+	12	1	AGO1,AGO1-4,AGO2	1	0	0	0	1	0	1	4
MIMAT0000719	hsa-miR-577	ENSG00000070831	CDC42	protein_coding	chr1	22418107	22418112	22418092	22418113	+	12	1	AGO1,AGO1-4,AGO2	1	0	0	0	1	1	1	0
MIMAT0000730	hsa-miR-579-3p	ENSG00000070831	CDC42	protein_coding	chr1	22418148	22418153	22418148	22418153	+	19	0	AGO1,AGO1-4,AGO2,AGO3,AGO4	1	0	0	0	0	0	0	5
MIMAT0000735	hsa-miR-580-3p	ENSG00000070831	CDC42	protein_coding	chr1	22417123	22417130	22417123	22417130	+	1	0	AGO2	1	0	0	0	0	0	0	2
MIMAT0000736	hsa-miR-582-5p	ENSG00000070831	CDC42	protein_coding	chr1	22418215	22418220	22418193	22418221	+	5	0	AGO1-4,AGO2	1	0	0	1	0	0	0	2
MIMAT0000736	hsa-miR-613	ENSG00000070831	CDC42	protein_coding	chr1	22419387	22419394	22419367	22419395	+	5	0	AGO1,AGO1-4,AGO2	1	0	0	1	1	0	0	2
MIMAT0000751	hsa-miR-620	ENSG00000070831	CDC42	protein_coding	chr1	22417034	22417040	22417034	22417040	+	2	0	AGO2	1	0	0	0	0	0	1	1
MIMAT0000753	hsa-miR-625-5p	ENSG00000070831	CDC42	protein_coding	chr1	22418148	22418154	22418132	22418155	+	25	0	AGO1,AGO1-4,AGO2,AGO3,AGO4	1	0	0	0	1	1	0	6
MIMAT0000771	hsa-miR-33b-5p	ENSG00000070831	CDC42	protein_coding	chr1	22418195	22418200	22418195	22418200	+	4	0	AGO1-4	1	0	0	0	0	0	0	1
MIMAT0000772	hsa-miR-641	ENSG00000070831	CDC42	protein_coding	chr1	22419133	22419138	22419133	22419138	+	1	0	AGO1	1	0	0	0	0	0	0	4
MIMAT0000773	hsa-miR-654-5p	ENSG00000070831	CDC42	protein_coding	chr1	22419233	22419238	22419233	22419238	+	8	0	AGO1,AGO2	1	0	0	0	0	0	0	3
MIMAT0001075	hsa-miR-655-3p	ENSG00000070831	CDC42	protein_coding	chr1	22418597	22418602	22418597	22418602	+	9	0	AGO1-4,AGO2	1	0	0	0	0	0	0	0
MIMAT0001341	hsa-miR-421	ENSG00000070831	CDC42	protein_coding	chr1	22416551	22416554	22416534	22416557	+	7	0	AGO1,AGO2,AGO3	2	0	2	0	1	1	2	4
MIMAT0001341	hsa-miR-671-5p	ENSG00000070831	CDC42	protein_coding	chr1	22416740	22416746	22416728	22416747	+	1	0	AGO2	1	0	1	0	1	1	1	4
MIMAT0001341	hsa-miR-454-3p	ENSG00000070831	CDC42	protein_coding	chr1	22418369	22418374	22418369	22418374	+	7	0	AGO1-4	1	0	0	0	0	0	0	4
MIMAT0001412	hsa-miR-28-3p	ENSG00000070831	CDC42	protein_coding	chr1	22418847	22418853	22418826	22418854	+	7	0	AGO1,AGO1-4,AGO2	1	0	1	1	1	0	1	6
MIMAT0001412	hsa-miR-199b-3p	ENSG00000070831	CDC42	protein_coding	chr1	22419321	22419326	22419299	22419327	+	4	0	AGO1,AGO1-4,AGO2	1	0	1	1	0	0	0	6
MIMAT0001532	hsa-miR-219a-2-3p	ENSG00000070831	CDC42	protein_coding	chr1	22419393	22419399	22419372	22419400	+	5	0	AGO1,AGO1-4,AGO2	1	0	1	1	1	0	0	2
MIMAT0001536	hsa-miR-296-3p	ENSG00000070831	CDC42	protein_coding	chr1	22418679	22418685	22418658	22418686	+	5	0	AGO1-4	1	0	0	1	1	0	0	0
MIMAT0001536	hsa-miR-361-3p	ENSG00000070831	CDC42	protein_coding	chr1	22418841	22418846	22418819	22418847	+	7	0	AGO1,AGO1-4,AGO2	1	0	0	1	0	0	0	0
MIMAT0001627	hsa-miR-362-3p	ENSG00000070831	CDC42	protein_coding	chr1	22418695	22418700	22418695	22418700	+	7	0	AGO1-4,AGO2	1	0	0	0	0	0	0	2
MIMAT0001629	hsa-miR-371a-5p	ENSG00000070831	CDC42	protein_coding	chr1	22417973	22418001	22417973	22418001	+	19	0	AGO1-4,AGO2	0	0	0	1	0	0	0	1
MIMAT0001629	hsa-miR-379-3p	ENSG00000070831	CDC42	protein_coding	chr1	22418260	22418282	22418254	22418288	+	1	0	AGO1-4	0	0	0	4	0	0	0	1
MIMAT0001629	hsa-miR-423-5p	ENSG00000070831	CDC42	protein_coding	chr1	22418437	22418465	22418437	22418465	+	1	0	AGO2	0	0	0	1	0	0	0	1
MIMAT0002171	hsa-miR-488-3p	ENSG00000070831	CDC42	protein_coding	chr1	22418917	22418922	22418917	22418922	+	5	0	AGO1-4,AGO2	1	0	0	0	0	0	0	1
MIMAT0002816	hsa-miR-616-3p	ENSG00000070831	CDC42	protein_coding	chr1	22418255	22418260	22418241	22418261	+	3	0	AGO1-4,AGO2	1	0	0	0	1	0	0	1
MIMAT0002817	hsa-miR-629-5p	ENSG00000070831	CDC42	protein_coding	chr1	22417121	22417126	22417106	22417127	+	2	0	AGO2	1	0	0	0	1	0	0	5
MIMAT0002817	hsa-miR-411-3p	ENSG00000070831	CDC42	protein_coding	chr1	22418250	22418255	22418228	22418256	+	3	0	AGO1-4,AGO2	1	0	0	1	1	0	0	5
MIMAT0002817	hsa-miR-654-3p	ENSG00000070831	CDC42	protein_coding	chr1	22418304	22418309	22418282	22418310	+	6	0	AGO1-4,AGO2	1	0	0	1	1	0	0	5
MIMAT0002817	hsa-miR-300	ENSG00000070831	CDC42	protein_coding	chr1	22418422	22418422	22418395	22418428	+	8	0	AGO1,AGO1-4,AGO2	2	0	0	2	0	0	0	5
MIMAT0002817	hsa-miR-888-5p	ENSG00000070831	CDC42	protein_coding	chr1	22418773	22418778	22418751	22418779	+	12	0	AGO1,AGO1-4,AGO2	1	0	0	1	0	0	0	5
MIMAT0002818	hsa-miR-541-3p	ENSG00000070831	CDC42	protein_coding	chr1	22418632	22418637	22418617	22418638	+	9	0	AGO1,AGO1-4,AGO2	1	0	0	0	1	0	0	1
MIMAT0002820	hsa-miR-875-5p	ENSG00000070831	CDC42	protein_coding	chr1	22416551	22416554	22416535	22416557	+	7	0	AGO1,AGO2,AGO3	2	0	2	0	1	1	2	12
MIMAT0002820	hsa-miR-885-5p	ENSG00000070831	CDC42	protein_coding	chr1	22416740	22416743	22416727	22416747	+	1	0	AGO2	1	0	1	0	1	2	1	12
MIMAT0002820	hsa-miR-873-5p	ENSG00000070831	CDC42	protein_coding	chr1	22418369	22418374	22418369	22418374	+	7	0	AGO1-4	1	0	0	0	0	0	0	12
MIMAT0002826	hsa-miR-543	ENSG00000070831	CDC42	protein_coding	chr1	22418389	22418394	22418389	22418394	+	7	0	AGO1,AGO1-4	1	0	0	0	0	0	0	1
MIMAT0002833	hsa-miR-760	ENSG00000070831	CDC42	protein_coding	chr1	22418386	22418392	22418386	22418392	+	7	0	AGO1,AGO1-4	1	0	1	0	0	0	0	1
MIMAT0002838	hsa-miR-301b-3p	ENSG00000070831	CDC42	protein_coding	chr1	22418386	22418392	22418386	22418392	+	7	0	AGO1,AGO1-4	1	0	1	0	0	0	0	1
MIMAT0002849	hsa-miR-208b-3p	ENSG00000070831	CDC42	protein_coding	chr1	22418877	22418882	22418855	22418883	+	6	0	AGO1-4,AGO2	1	0	1	1	0	0	0	1
MIMAT0002849	hsa-miR-320b	ENSG00000070831	CDC42	protein_coding	chr1	22419387	22419393	22419366	22419394	+	5	0	AGO1,AGO1-4,AGO2	1	0	1	1	0	0	0	1
MIMAT0002855	hsa-miR-320c	ENSG00000070831	CDC42	protein_coding	chr1	22418877	22418882	22418855	22418883	+	6	0	AGO1-4,AGO2	1	0	1	1	0	0	0	1
MIMAT0002855	hsa-miR-1323	ENSG00000070831	CDC42	protein_coding	chr1	22419387	22419393	22419366	22419394	+	5	0	AGO1,AGO1-4,AGO2	1	0	1	1	0	0	0	1
MIMAT0002858	hsa-miR-1185-5p	ENSG00000070831	CDC42	protein_coding	chr1	22417019	22417024	22417019	22417024	+	2	0	AGO2	1	0	0	0	0	0	0	0
MIMAT0002867	hsa-miR-1298-5p	ENSG00000070831	CDC42	protein_coding	chr1	22417019	22417024	22417019	22417024	+	2	0	AGO2	1	0	0	0	0	0	0	1
MIMAT0002868	hsa-miR-1179	ENSG00000070831	CDC42	protein_coding	chr1	22418781	22418786	22418781	22418786	+	6	0	AGO1-4	1	0	0	0	0	0	0	1
MIMAT0002870	hsa-miR-1251-5p	ENSG00000070831	CDC42	protein_coding	chr1	22418914	22418919	22418914	22418919	+	5	0	AGO1-4,AGO2	1	0	0	0	0	0	0	7
MIMAT0002874	hsa-miR-548o-3p	ENSG00000070831	CDC42	protein_coding	chr1	22416552	22416554	22416549	22416557	+	7	0	AGO1,AGO2,AGO3	2	0	2	0	0	0	0	3
MIMAT0002874	hsa-miR-1270	ENSG00000070831	CDC42	protein_coding	chr1	22416741	22416746	22416739	22416746	+	1	0	AGO2	1	0	1	0	0	0	0	3
MIMAT0002874	hsa-miR-1276	ENSG00000070831	CDC42	protein_coding	chr1	22418369	22418374	22418369	22418374	+	7	0	AGO1-4	1	0	0	0	0	0	0	3
MIMAT0002877	hsa-miR-1278	ENSG00000070831	CDC42	protein_coding	chr1	22418755	22418760	22418755	22418760	+	10	0	AGO1-4,AGO2	1	0	0	0	0	0	0	3
MIMAT0002878	hsa-miR-1321	ENSG00000070831	CDC42	protein_coding	chr1	22418650	22418655	22418650	22418655	+	5	0	AGO1-4	1	0	0	0	0	0	0	6
MIMAT0002888	hsa-miR-320d	ENSG00000070831	CDC42	protein_coding	chr1	22418320	22418326	22418319	22418326	+	7	0	AGO1-4,AGO2	1	0	1	0	0	0	0	4
MIMAT0003161	hsa-miR-1914-3p	ENSG00000070831	CDC42	protein_coding	chr1	22419322	22419327	22419322	22419327	+	4	0	AGO1,AGO1-4,AGO2	1	0	0	0	0	0	0	2
MIMAT0003165	hsa-miR-761	ENSG00000070831	CDC42	protein_coding	chr1	22416546	22416552	22416546	22416552	+	7	0	AGO1,AGO2,AGO3	1	0	0	0	0	0	0	1
MIMAT0003165	hsa-miR-2114-3p	ENSG00000070831	CDC42	protein_coding	chr1	22417027	22417032	22417027	22417032	+	2	0	AGO2	1	0	0	0	0	0	0	1
MIMAT0003165	hsa-miR-3129-5p	ENSG00000070831	CDC42	protein_coding	chr1	22418784	22418790	22418784	22418790	+	5	0	AGO1-4	1	0	0	0	0	0	0	1
MIMAT0003215	hsa-miR-3179	ENSG00000070831	CDC42	protein_coding	chr1	22418979	22418984	22418979	22418984	+	14	0	AGO1-4,AGO2	1	0	0	0	0	0	0	1
MIMAT0003218	hsa-miR-3184-5p	ENSG00000070831	CDC42	protein_coding	chr1	22418107	22418112	22418085	22418113	+	12	1	AGO1,AGO1-4,AGO2	1	0	0	1	1	1	1	3
MIMAT0003241	hsa-miR-4306	ENSG00000070831	CDC42	protein_coding	chr1	22418567	22418572	22418567	22418572	+	8	0	AGO1-4,AGO2	1	0	0	0	0	0	0	5
MIMAT0003242	hsa-miR-3605-5p	ENSG00000070831	CDC42	protein_coding	chr1	22417130	22417135	22417130	22417135	+	1	0	AGO2	1	0	0	0	0	0	0	9
MIMAT0003244	hsa-miR-3619-5p	ENSG00000070831	CDC42	protein_coding	chr1	22418830	22418835	22418808	22418836	+	7	0	AGO1,AGO1-4,AGO2	1	0	0	1	0	1	0	3
MIMAT0003244	hsa-miR-3681-3p	ENSG00000070831	CDC42	protein_coding	chr1	22418863	22418870	22418843	22418871	+	4	0	AGO1-4,AGO2	1	0	0	1	0	0	0	3
MIMAT0003245	hsa-miR-3150b-3p	ENSG00000070831	CDC42	protein_coding	chr1	22419371	22419376	22419371	22419376	+	3	0	AGO1-4,AGO2	1	0	0	0	0	0	0	4
MIMAT0003247	hsa-miR-374c-5p	ENSG00000070831	CDC42	protein_coding	chr1	22416570	22416575	22416570	22416575	+	2	0	AGO2	1	0	0	0	0	0	0	6
MIMAT0003281	hsa-miR-3194-3p	ENSG00000070831	CDC42	protein_coding	chr1	22418544	22418550	22418532	22418551	+	11	0	AGO1,AGO1-4,AGO2	1	0	0	0	1	1	1	0
MIMAT0003289	hsa-miR-4644	ENSG00000070831	CDC42	protein_coding	chr1	22418659	22418664	22418659	22418664	+	5	0	AGO1-4	1	0	0	0	0	0	0	0
MIMAT0003294	hsa-miR-4735-3p	ENSG00000070831	CDC42	protein_coding	chr1	22418182	22418188	22418182	22418188	+	4	0	AGO1-4	1	0	0	0	0	0	0	4
MIMAT0003301	hsa-miR-3064-5p	ENSG00000070831	CDC42	protein_coding	chr1	22418857	22418862	22418857	22418862	+	4	0	AGO1-4,AGO2	1	0	0	0	0	0	0	4
MIMAT0003301	hsa-miR-4761-3p	ENSG00000070831	CDC42	protein_coding	chr1	22418966	22418971	22418966	22418971	+	14	0	AGO1,AGO1-4,AGO2	1	0	0	0	0	0	0	4
MIMAT0003301	hsa-miR-4766-5p	ENSG00000070831	CDC42	protein_coding	chr1	22419230	22419235	22419230	22419235	+	7	0	AGO1,AGO2	1	0	0	0	0	0	0	4
MIMAT0003311	hsa-miR-4784	ENSG00000070831	CDC42	protein_coding	chr1	22418913	22418918	22418913	22418918	+	5	0	AGO1-4,AGO2	1	0	0	0	0	0	0	3
MIMAT0003330	hsa-miR-5094	ENSG00000070831	CDC42	protein_coding	chr1	22419319	22419324	22419319	22419324	+	4	0	AGO1,AGO1-4,AGO2	1	0	0	0	0	0	0	2
MIMAT0003331	hsa-miR-5194	ENSG00000070831	CDC42	protein_coding	chr1	22419412	22419417	22419390	22419418	+	5	0	AGO1,AGO1-4,AGO2	1	0	0	1	0	1	1	3
MIMAT0003339	hsa-miR-664b-3p	ENSG00000070831	CDC42	protein_coding	chr1	22418362	22418367	22418362	22418367	+	8	0	AGO1-4,AGO2	1	0	1	0	0	0	0	0
MIMAT0003339	hsa-miR-5590-3p	ENSG00000070831	CDC42	protein_coding	chr1	22419303	22419308	22419287	22419309	+	4	0	AGO1-4,AGO2	1	0	1	0	1	0	0	0
MIMAT0003339	hsa-miR-5688	ENSG00000070831	CDC42	protein_coding	chr1	22419356	22419361	22419340	22419362	+	4	0	AGO1,AGO1-4,AGO2	1	0	1	0	1	0	0	0
MIMAT0003880	hsa-miR-216a-3p	ENSG00000070831	CDC42	protein_coding	chr1	22416555	22416560	22416555	22416560	+	6	0	AGO1,AGO2	1	0	0	0	0	0	0	6
MIMAT0003885	hsa-miR-6504-5p	ENSG00000070831	CDC42	protein_coding	chr1	22418141	22418146	22418141	22418146	+	22	0	AGO1,AGO1-4,AGO2,AGO3,AGO4	1	0	0	0	0	0	0	9
MIMAT0004502	hsa-miR-6838-5p	ENSG00000070831	CDC42	protein_coding	chr1	22418560	22418566	22418560	22418566	+	8	0	AGO1-4,AGO2	1	0	1	0	0	0	0	5
MIMAT0000062	hsa-let-7a-5p	ENSG00000213341	CHUK	protein_coding	chr10	101948854	101948860	101948853	101948873	-	2	0	AGO1-4,AGO2	1	0	1	0	1	0	1	7
MIMAT0000063	hsa-let-7b-5p	ENSG00000213341	CHUK	protein_coding	chr10	101948854	101948860	101948853	101948873	-	2	0	AGO1-4,AGO2	1	0	1	0	1	0	1	11
MIMAT0000064	hsa-let-7c-5p	ENSG00000213341	CHUK	protein_coding	chr10	101948854	101948860	101948853	101948873	-	2	0	AGO1-4,AGO2	1	0	1	0	1	0	1	12
MIMAT0000065	hsa-let-7d-5p	ENSG00000213341	CHUK	protein_coding	chr10	101948854	101948860	101948853	101948873	-	2	0	AGO1-4,AGO2	1	0	1	0	1	0	1	13
MIMAT0000066	hsa-let-7e-5p	ENSG00000213341	CHUK	protein_coding	chr10	101948854	101948860	101948853	101948873	-	2	0	AGO1-4,AGO2	1	0	1	0	1	0	1	8
MIMAT0000067	hsa-let-7f-5p	ENSG00000213341	CHUK	protein_coding	chr10	101948854	101948860	101948853	101948873	-	2	0	AGO1-4,AGO2	1	0	1	0	1	0	1	5
MIMAT0000068	hsa-miR-15a-5p	ENSG00000213341	CHUK	protein_coding	chr10	101948359	101948364	101948358	101948386	-	27	0	AGO1,AGO1-4,AGO2,AGO3,AGO4	1	0	1	1	0	0	0	9
MIMAT0000068	hsa-miR-16-5p	ENSG00000213341	CHUK	protein_coding	chr10	101948382	101948388	101948381	101948409	-	27	0	AGO1,AGO1-4,AGO2,AGO3,AGO4	1	0	1	1	1	0	0	9
MIMAT0000068	hsa-miR-17-5p	ENSG00000213341	CHUK	protein_coding	chr10	101948890	101948895	101948889	101948917	-	6	0	AGO1,AGO1-4,AGO2	1	0	1	1	0	0	0	9
MIMAT0000069	hsa-miR-19a-3p	ENSG00000213341	CHUK	protein_coding	chr10	101948359	101948364	101948358	101948386	-	27	0	AGO1,AGO1-4,AGO2,AGO3,AGO4	1	0	1	1	0	0	0	7
MIMAT0000069	hsa-miR-19b-3p	ENSG00000213341	CHUK	protein_coding	chr10	101948382	101948388	101948381	101948409	-	27	0	AGO1,AGO1-4,AGO2,AGO3,AGO4	1	0	1	1	1	0	0	7
MIMAT0000069	hsa-miR-20a-5p	ENSG00000213341	CHUK	protein_coding	chr10	101948890	101948895	101948889	101948917	-	6	0	AGO1,AGO1-4,AGO2	1	0	1	1	0	0	0	7
MIMAT0000070	hsa-miR-21-5p	ENSG00000213341	CHUK	protein_coding	chr10	101948147	101948169	101948147	101948169	-	1	0	AGO1-4	0	0	0	0	1	0	0	3
MIMAT0000073	hsa-miR-23a-3p	ENSG00000213341	CHUK	protein_coding	chr10	101948842	101948847	101948842	101948847	-	2	0	AGO1-4,AGO2	1	0	0	0	0	0	0	6
MIMAT0000074	hsa-miR-25-3p	ENSG00000213341	CHUK	protein_coding	chr10	101948842	101948847	101948842	101948847	-	2	0	AGO1-4,AGO2	1	0	0	0	0	0	0	8
MIMAT0000075	hsa-miR-31-5p	ENSG00000213341	CHUK	protein_coding	chr10	101948147	101948169	101948147	101948169	-	1	0	AGO1-4	0	0	0	0	1	0	0	5
MIMAT0000076	hsa-miR-32-5p	ENSG00000213341	CHUK	protein_coding	chr10	101948474	101948480	101948473	101948494	-	3	0	AGO1-4,AGO2	1	0	0	0	1	0	0	3
MIMAT0000078	hsa-miR-92a-3p	ENSG00000213341	CHUK	protein_coding	chr10	101948180	101948186	101948179	101948207	-	3	0	AGO1-4,AGO2	1	0	0	1	1	0	1	5
MIMAT0000081	hsa-miR-93-5p	ENSG00000213341	CHUK	protein_coding	chr10	101948447	101948452	101948447	101948452	-	4	0	AGO1-4,AGO2	1	0	0	0	0	0	0	4
MIMAT0000089	hsa-miR-98-5p	ENSG00000213341	CHUK	protein_coding	chr10	101948262	101948267	101948262	101948267	-	3	0	AGO1-4,AGO2	1	0	0	0	0	0	0	6
MIMAT0000090	hsa-miR-103a-3p	ENSG00000213341	CHUK	protein_coding	chr10	101948447	101948452	101948447	101948452	-	4	0	AGO1-4,AGO2	1	0	0	0	0	0	0	10
MIMAT0000092	hsa-miR-105-5p	ENSG00000213341	CHUK	protein_coding	chr10	101948447	101948452	101948447	101948452	-	4	0	AGO1-4,AGO2	1	0	0	0	0	0	0	7
MIMAT0000093	hsa-miR-106a-5p	ENSG00000213341	CHUK	protein_coding	chr10	101948147	101948169	101948147	101948169	-	1	0	AGO1-4	0	0	0	0	1	0	0	3
MIMAT0000096	hsa-miR-107	ENSG00000213341	CHUK	protein_coding	chr10	101948854	101948860	101948853	101948873	-	2	0	AGO1-4,AGO2	1	0	1	0	1	0	1	3
MIMAT0000101	hsa-miR-196a-5p	ENSG00000213341	CHUK	protein_coding	chr10	101948357	101948362	101948357	101948362	-	5	0	AGO1-4,AGO2	1	0	0	0	0	0	0	5
MIMAT0000101	hsa-miR-197-3p	ENSG00000213341	CHUK	protein_coding	chr10	101948383	101948388	101948383	101948388	-	27	0	AGO1,AGO1-4,AGO2,AGO3,AGO4	1	0	0	0	0	0	0	5
MIMAT0000102	hsa-miR-208a-3p	ENSG00000213341	CHUK	protein_coding	chr10	101948455	101948460	101948454	101948482	-	3	0	AGO1-4,AGO2	1	0	1	1	0	0	0	1
MIMAT0000102	hsa-miR-129-5p	ENSG00000213341	CHUK	protein_coding	chr10	101948586	101948591	101948585	101948613	-	2	0	AGO2	1	0	1	1	0	0	0	1
MIMAT0000102	hsa-miR-148a-3p	ENSG00000213341	CHUK	protein_coding	chr10	101948603	101948608	101948602	101948630	-	2	0	AGO2	1	0	1	1	0	0	0	1
MIMAT0000103	hsa-miR-7-5p	ENSG00000213341	CHUK	protein_coding	chr10	101948147	101948169	101948147	101948169	-	1	0	AGO1-4	0	0	0	0	1	0	0	5
MIMAT0000104	hsa-miR-214-3p	ENSG00000213341	CHUK	protein_coding	chr10	101948357	101948362	101948357	101948362	-	5	0	AGO1-4,AGO2	1	0	0	0	0	0	0	3
MIMAT0000104	hsa-miR-219a-5p	ENSG00000213341	CHUK	protein_coding	chr10	101948383	101948388	101948383	101948388	-	27	0	AGO1,AGO1-4,AGO2,AGO3,AGO4	1	0	0	0	0	0	0	3
MIMAT0000226	hsa-miR-223-3p	ENSG00000213341	CHUK	protein_coding	chr10	101948855	101948860	101948855	101948860	-	2	0	AGO1-4,AGO2	1	0	0	0	0	0	0	3
MIMAT0000226	hsa-let-7g-5p	ENSG00000213341	CHUK	protein_coding	chr10	101948914	101948919	101948914	101948919	-	2	0	AGO1-4,AGO2	1	0	0	0	0	0	0	3
MIMAT0000227	hsa-let-7i-5p	ENSG00000213341	CHUK	protein_coding	chr10	101948342	101948348	101948341	101948362	-	5	0	AGO1-4,AGO2	1	0	0	0	1	0	0	8
MIMAT0000227	hsa-miR-15b-5p	ENSG00000213341	CHUK	protein_coding	chr10	101948468	101948473	101948468	101948473	-	3	0	AGO1-4,AGO2	1	0	0	0	0	0	0	8
MIMAT0000241	hsa-miR-23b-3p	ENSG00000213341	CHUK	protein_coding	chr10	101948190	101948197	101948189	101948209	-	3	0	AGO1-4,AGO2	1	0	0	0	1	0	0	1
MIMAT0000242	hsa-miR-122-5p	ENSG00000213341	CHUK	protein_coding	chr10	101948501	101948506	101948501	101948506	-	3	0	AGO1-4,AGO2	1	0	0	0	0	0	0	4
MIMAT0000243	hsa-miR-128-3p	ENSG00000213341	CHUK	protein_coding	chr10	101948840	101948846	101948839	101948867	-	2	0	AGO1-4,AGO2	1	0	1	1	1	0	0	5
MIMAT0000252	hsa-miR-130a-3p	ENSG00000213341	CHUK	protein_coding	chr10	101948825	101948830	101948825	101948830	-	1	0	AGO2	1	0	0	0	0	0	0	3
MIMAT0000271	hsa-miR-133a-3p	ENSG00000213341	CHUK	protein_coding	chr10	101948358	101948363	101948358	101948363	-	5	0	AGO1-4,AGO2	1	0	0	0	0	0	0	11
MIMAT0000276	hsa-miR-142-5p	ENSG00000213341	CHUK	protein_coding	chr10	101948575	101948580	101948574	101948593	-	2	0	AGO2	1	0	0	0	1	0	0	6
MIMAT0000280	hsa-miR-152-3p	ENSG00000213341	CHUK	protein_coding	chr10	101948432	101948438	101948431	101948454	-	5	0	AGO1-4,AGO2	1	0	0	0	1	0	1	2
MIMAT0000414	hsa-miR-153-3p	ENSG00000213341	CHUK	protein_coding	chr10	101948854	101948860	101948853	101948873	-	2	0	AGO1-4,AGO2	1	0	1	0	1	0	1	6
MIMAT0000415	hsa-miR-126-5p	ENSG00000213341	CHUK	protein_coding	chr10	101948854	101948860	101948853	101948873	-	2	0	AGO1-4,AGO2	1	0	1	0	1	0	1	4
MIMAT0000417	hsa-miR-146a-5p	ENSG00000213341	CHUK	protein_coding	chr10	101948382	101948388	101948381	101948403	-	27	0	AGO1,AGO1-4,AGO2,AGO3,AGO4	1	0	1	0	1	0	0	5
MIMAT0000417	hsa-miR-195-5p	ENSG00000213341	CHUK	protein_coding	chr10	101948890	101948895	101948890	101948895	-	6	0	AGO1,AGO1-4,AGO2	1	0	1	0	0	0	0	5
MIMAT0000418	hsa-miR-106b-5p	ENSG00000213341	CHUK	protein_coding	chr10	101948180	101948186	101948179	101948207	-	3	0	AGO1-4,AGO2	1	0	0	1	1	1	1	8
MIMAT0000421	hsa-miR-301a-3p	ENSG00000213341	CHUK	protein_coding	chr10	101948534	101948539	101948534	101948539	-	2	0	AGO2	1	0	1	0	0	0	0	6
MIMAT0000424	hsa-miR-130b-3p	ENSG00000213341	CHUK	protein_coding	chr10	101948236	101948241	101948236	101948241	-	4	0	AGO1-4,AGO2	1	0	0	0	0	0	0	1
MIMAT0000424	hsa-miR-363-3p	ENSG00000213341	CHUK	protein_coding	chr10	101948346	101948351	101948346	101948351	-	3	0	AGO1-4,AGO2	1	0	0	0	0	0	0	1
MIMAT0000425	hsa-miR-365a-3p	ENSG00000213341	CHUK	protein_coding	chr10	101948536	101948541	101948536	101948541	-	3	0	AGO1,AGO2	1	0	0	0	0	0	0	12
MIMAT0000425	hsa-miR-367-3p	ENSG00000213341	CHUK	protein_coding	chr10	101948841	101948847	101948840	101948861	-	2	0	AGO1-4,AGO2	1	0	0	0	1	0	0	12
MIMAT0000427	hsa-miR-376c-3p	ENSG00000213341	CHUK	protein_coding	chr10	101948977	101948982	101948977	101948982	-	1	0	AGO1-4	1	0	0	0	0	0	0	8
MIMAT0000433	hsa-miR-369-3p	ENSG00000213341	CHUK	protein_coding	chr10	101948391	101948396	101948391	101948396	-	27	0	AGO1,AGO1-4,AGO2,AGO3,AGO4	1	0	0	0	0	0	0	2
MIMAT0000433	hsa-miR-376a-3p	ENSG00000213341	CHUK	protein_coding	chr10	101948529	101948534	101948529	101948534	-	2	0	AGO2	1	0	0	0	0	0	0	2
MIMAT0000438	hsa-miR-377-3p	ENSG00000213341	CHUK	protein_coding	chr10	101948840	101948846	101948839	101948867	-	2	0	AGO1-4,AGO2	1	0	1	1	1	0	0	6
MIMAT0000439	hsa-miR-379-5p	ENSG00000213341	CHUK	protein_coding	chr10	101948313	101948318	101948313	101948318	-	1	0	AGO1-4	1	0	0	0	0	0	0	1
MIMAT0000444	hsa-miR-380-3p	ENSG00000213341	CHUK	protein_coding	chr10	101948663	101948669	101948663	101948669	-	4	0	AGO1,AGO2	0	0	0	0	0	1	0	3
MIMAT0000449	hsa-miR-381-3p	ENSG00000213341	CHUK	protein_coding	chr10	101948829	101948834	101948829	101948834	-	1	0	AGO2	1	0	0	0	0	0	0	7
MIMAT0000461	hsa-miR-382-5p	ENSG00000213341	CHUK	protein_coding	chr10	101948359	101948364	101948358	101948386	-	27	0	AGO1,AGO1-4,AGO2,AGO3,AGO4	1	0	1	1	0	0	0	12
MIMAT0000461	hsa-miR-323a-3p	ENSG00000213341	CHUK	protein_coding	chr10	101948382	101948388	101948381	101948409	-	27	0	AGO1,AGO1-4,AGO2,AGO3,AGO4	1	0	1	1	1	0	0	12
MIMAT0000461	hsa-miR-151a-3p	ENSG00000213341	CHUK	protein_coding	chr10	101948890	101948895	101948889	101948917	-	6	0	AGO1,AGO1-4,AGO2	1	0	1	1	0	0	0	12
MIMAT0000680	hsa-miR-148b-3p	ENSG00000213341	CHUK	protein_coding	chr10	101948147	101948167	101948147	101948167	-	1	0	AGO1-4	0	0	0	0	1	0	0	7
MIMAT0000688	hsa-miR-133b	ENSG00000213341	CHUK	protein_coding	chr10	101948536	101948541	101948536	101948541	-	3	0	AGO1,AGO2	1	0	0	0	0	0	0	4
MIMAT0000688	hsa-miR-196b-5p	ENSG00000213341	CHUK	protein_coding	chr10	101948841	101948847	101948840	101948862	-	2	0	AGO1-4,AGO2	1	0	0	0	1	0	0	4
MIMAT0000691	hsa-miR-424-5p	ENSG00000213341	CHUK	protein_coding	chr10	101948536	101948541	101948536	101948541	-	3	0	AGO1,AGO2	1	0	0	0	0	0	0	5
MIMAT0000691	hsa-miR-20b-5p	ENSG00000213341	CHUK	protein_coding	chr10	101948841	101948847	101948840	101948860	-	2	0	AGO1-4,AGO2	1	0	0	0	1	0	0	5
MIMAT0000707	hsa-miR-448	ENSG00000213341	CHUK	protein_coding	chr10	101948447	101948452	101948447	101948452	-	4	0	AGO1-4,AGO2	1	0	0	0	0	0	0	6
MIMAT0000710	hsa-miR-329-3p	ENSG00000213341	CHUK	protein_coding	chr10	101948932	101948937	101948932	101948937	-	1	0	AGO1-4	1	0	0	0	0	0	0	15
MIMAT0000719	hsa-miR-452-5p	ENSG00000213341	CHUK	protein_coding	chr10	101948447	101948452	101948447	101948452	-	4	0	AGO1-4,AGO2	1	0	0	0	0	0	0	0
MIMAT0000720	hsa-miR-409-3p	ENSG00000213341	CHUK	protein_coding	chr10	101949014	101949020	101949013	101949033	-	2	0	AGO1-4,AGO2	1	0	0	0	1	0	0	11
MIMAT0000721	hsa-miR-410-3p	ENSG00000213341	CHUK	protein_coding	chr10	101948198	101948203	101948198	101948203	-	3	0	AGO1-4,AGO2	1	0	0	0	0	0	0	6
MIMAT0000729	hsa-miR-376b-3p	ENSG00000213341	CHUK	protein_coding	chr10	101949213	101949218	101949213	101949218	-	2	0	AGO2	1	0	1	0	0	0	0	6
MIMAT0000729	hsa-miR-485-5p	ENSG00000213341	CHUK	protein_coding	chr10	101949237	101949242	101949237	101949242	-	1	0	AGO2	1	0	1	0	0	0	0	6
MIMAT0000730	hsa-miR-487a-3p	ENSG00000213341	CHUK	protein_coding	chr10	101948403	101948408	101948402	101948423	-	24	0	AGO1,AGO1-4,AGO2,AGO3,AGO4	1	0	0	0	1	0	1	9
MIMAT0000733	hsa-miR-490-3p	ENSG00000213341	CHUK	protein_coding	chr10	101948856	101948861	101948856	101948861	-	2	0	AGO1-4,AGO2	1	0	1	0	0	0	0	3
MIMAT0000733	hsa-miR-146b-5p	ENSG00000213341	CHUK	protein_coding	chr10	101948915	101948921	101948914	101948932	-	2	0	AGO1-4,AGO2	1	0	1	0	1	0	0	3
MIMAT0000735	hsa-miR-493-5p	ENSG00000213341	CHUK	protein_coding	chr10	101948616	101948622	101948616	101948622	-	2	0	AGO2	1	0	0	0	0	0	0	4
MIMAT0000736	hsa-miR-495-3p	ENSG00000213341	CHUK	protein_coding	chr10	101948963	101948968	101948963	101948968	-	1	0	AGO1-4	1	0	0	0	0	0	0	2
MIMAT0000737	hsa-miR-497-5p	ENSG00000213341	CHUK	protein_coding	chr10	101948265	101948272	101948264	101948282	-	3	0	AGO1-4,AGO2	1	0	0	0	1	0	0	3
MIMAT0000737	hsa-miR-498	ENSG00000213341	CHUK	protein_coding	chr10	101949000	101949005	101949000	101949005	-	1	0	AGO1-4	1	0	0	0	0	0	0	3
MIMAT0000755	hsa-miR-524-5p	ENSG00000213341	CHUK	protein_coding	chr10	101948328	101948333	101948327	101948355	-	5	0	AGO1-4,AGO2	1	0	0	1	0	0	0	1
MIMAT0000755	hsa-miR-519d-3p	ENSG00000213341	CHUK	protein_coding	chr10	101948631	101948636	101948630	101948658	-	3	0	AGO2	1	0	0	1	0	0	1	1
MIMAT0000757	hsa-miR-520d-5p	ENSG00000213341	CHUK	protein_coding	chr10	101948917	101948922	101948917	101948922	-	2	0	AGO1-4,AGO2	1	0	0	0	0	0	0	3
MIMAT0000759	hsa-miR-522-3p	ENSG00000213341	CHUK	protein_coding	chr10	101948840	101948846	101948839	101948867	-	2	0	AGO1-4,AGO2	1	0	1	1	1	0	0	3
MIMAT0000770	hsa-miR-499a-5p	ENSG00000213341	CHUK	protein_coding	chr10	101948977	101948982	101948977	101948982	-	1	0	AGO1-4	1	0	0	0	0	0	0	8
MIMAT0001080	hsa-miR-503-5p	ENSG00000213341	CHUK	protein_coding	chr10	101948855	101948860	101948855	101948860	-	2	0	AGO1-4,AGO2	1	0	0	0	0	0	0	3
MIMAT0001080	hsa-miR-508-3p	ENSG00000213341	CHUK	protein_coding	chr10	101948914	101948919	101948914	101948919	-	2	0	AGO1-4,AGO2	1	0	0	0	0	0	0	3
MIMAT0001341	hsa-miR-514a-3p	ENSG00000213341	CHUK	protein_coding	chr10	101948382	101948386	101948358	101948409	-	27	0	AGO1,AGO1-4,AGO2,AGO3,AGO4	1	0	1	2	1	0	0	8
MIMAT0001341	hsa-miR-532-5p	ENSG00000213341	CHUK	protein_coding	chr10	101948890	101948895	101948889	101948917	-	6	0	AGO1,AGO1-4,AGO2	1	0	1	1	0	0	0	8
MIMAT0001413	hsa-miR-493-3p	ENSG00000213341	CHUK	protein_coding	chr10	101948147	101948169	101948147	101948169	-	1	0	AGO1-4	0	0	0	0	1	0	0	3
MIMAT0001532	hsa-miR-545-3p	ENSG00000213341	CHUK	protein_coding	chr10	101948313	101948319	101948312	101948333	-	1	0	AGO1-4	1	0	0	0	1	0	1	2
MIMAT0001629	hsa-miR-552-3p	ENSG00000213341	CHUK	protein_coding	chr10	101948693	101948698	101948692	101948713	-	2	0	AGO2	1	0	0	0	1	0	0	6
MIMAT0001635	hsa-miR-92b-3p	ENSG00000213341	CHUK	protein_coding	chr10	101948770	101948775	101948769	101948797	-	7	0	AGO2	1	0	1	1	0	0	0	8
MIMAT0001639	hsa-miR-576-5p	ENSG00000213341	CHUK	protein_coding	chr10	101949047	101949052	101949047	101949052	-	1	0	AGO2	1	0	0	0	0	0	0	0
MIMAT0002171	hsa-miR-577	ENSG00000213341	CHUK	protein_coding	chr10	101948167	101948172	101948167	101948172	-	1	0	AGO1-4	1	0	0	0	0	0	0	4
MIMAT0002172	hsa-miR-579-3p	ENSG00000213341	CHUK	protein_coding	chr10	101949213	101949218	101949213	101949218	-	2	0	AGO2	1	0	1	0	0	0	0	10
MIMAT0002172	hsa-miR-590-5p	ENSG00000213341	CHUK	protein_coding	chr10	101949237	101949242	101949237	101949242	-	1	0	AGO2	1	0	1	0	0	0	0	10
MIMAT0002175	hsa-miR-625-5p	ENSG00000213341	CHUK	protein_coding	chr10	101949162	101949167	101949162	101949167	-	1	0	AGO2	1	0	0	0	0	0	0	6
MIMAT0002178	hsa-miR-641	ENSG00000213341	CHUK	protein_coding	chr10	101949212	101949217	101949212	101949217	-	2	0	AGO2	1	0	0	0	0	0	0	6
MIMAT0002806	hsa-miR-642a-5p	ENSG00000213341	CHUK	protein_coding	chr10	101948832	101948837	101948832	101948837	-	2	0	AGO1-4,AGO2	1	0	0	0	0	0	0	3
MIMAT0002809	hsa-miR-411-5p	ENSG00000213341	CHUK	protein_coding	chr10	101948829	101948834	101948829	101948834	-	1	0	AGO2	1	0	0	0	0	0	0	6
MIMAT0002813	hsa-miR-655-3p	ENSG00000213341	CHUK	protein_coding	chr10	101948673	101948679	101948673	101948679	-	5	0	AGO1,AGO2	0	0	0	0	0	0	1	3
MIMAT0002817	hsa-miR-656-3p	ENSG00000213341	CHUK	protein_coding	chr10	101948584	101948589	101948583	101948611	-	2	0	AGO2	1	0	0	1	0	0	0	4
MIMAT0002820	hsa-miR-425-5p	ENSG00000213341	CHUK	protein_coding	chr10	101948382	101948388	101948381	101948401	-	27	0	AGO1,AGO1-4,AGO2,AGO3,AGO4	1	0	1	0	1	0	0	13
MIMAT0002820	hsa-miR-758-3p	ENSG00000213341	CHUK	protein_coding	chr10	101948890	101948895	101948890	101948895	-	6	0	AGO1,AGO1-4,AGO2	1	0	1	0	0	0	0	13
MIMAT0002824	hsa-miR-454-3p	ENSG00000213341	CHUK	protein_coding	chr10	101948426	101948431	101948426	101948431	-	5	0	AGO1-4,AGO2	1	0	1	0	0	0	0	4
MIMAT0002824	hsa-miR-130a-5p	ENSG00000213341	CHUK	protein_coding	chr10	101948870	101948875	101948870	101948875	-	1	0	AGO1-4	1	0	1	0	0	0	0	4
MIMAT0002849	hsa-miR-140-3p	ENSG00000213341	CHUK	protein_coding	chr10	101948601	101948606	101948600	101948628	-	2	0	AGO2	1	0	0	1	0	0	0	1
MIMAT0002849	hsa-miR-129-2-3p	ENSG00000213341	CHUK	protein_coding	chr10	101948964	101948969	101948963	101948991	-	1	0	AGO1-4	1	0	0	1	0	0	0	1
MIMAT0002853	hsa-miR-362-3p	ENSG00000213341	CHUK	protein_coding	chr10	101948147	101948169	101948147	101948175	-	2	0	AGO1-4,AGO2	0	0	0	1	1	0	0	4
MIMAT0002855	hsa-miR-340-5p	ENSG00000213341	CHUK	protein_coding	chr10	101948601	101948606	101948601	101948606	-	2	0	AGO2	1	0	0	0	0	0	0	2
MIMAT0002855	hsa-miR-488-3p	ENSG00000213341	CHUK	protein_coding	chr10	101948964	101948969	101948964	101948969	-	1	0	AGO1-4	1	0	0	0	0	0	0	2
MIMAT0002868	hsa-miR-455-3p	ENSG00000213341	CHUK	protein_coding	chr10	101948410	101948415	101948410	101948415	-	8	0	AGO1-4,AGO2	1	0	0	0	0	0	0	1
MIMAT0002870	hsa-miR-556-3p	ENSG00000213341	CHUK	protein_coding	chr10	101948190	101948195	101948189	101948217	-	5	0	AGO1-4,AGO2	1	0	0	1	1	0	0	5
MIMAT0002874	hsa-miR-589-5p	ENSG00000213341	CHUK	protein_coding	chr10	101948359	101948364	101948359	101948364	-	5	0	AGO1-4,AGO2	1	0	1	0	0	0	0	4
MIMAT0002874	hsa-miR-624-3p	ENSG00000213341	CHUK	protein_coding	chr10	101948382	101948387	101948382	101948387	-	27	0	AGO1,AGO1-4,AGO2,AGO3,AGO4	1	0	1	0	0	0	0	4
MIMAT0002874	hsa-miR-300	ENSG00000213341	CHUK	protein_coding	chr10	101948890	101948895	101948890	101948895	-	6	0	AGO1,AGO1-4,AGO2	1	0	1	0	0	0	0	4
MIMAT0002880	hsa-miR-888-5p	ENSG00000213341	CHUK	protein_coding	chr10	101948575	101948580	101948575	101948580	-	2	0	AGO2	1	0	0	0	0	0	0	9
MIMAT0002883	hsa-miR-889-3p	ENSG00000213341	CHUK	protein_coding	chr10	101949003	101949009	101949003	101949010	-	1	0	AGO1-4	1	0	1	0	0	0	0	8
MIMAT0002888	hsa-miR-876-5p	ENSG00000213341	CHUK	protein_coding	chr10	101948933	101948938	101948933	101948938	-	1	0	AGO1-4	1	0	0	0	0	0	0	1
MIMAT0003161	hsa-miR-877-5p	ENSG00000213341	CHUK	protein_coding	chr10	101949019	101949024	101949019	101949024	-	1	0	AGO1-4	1	0	0	0	0	0	0	3
MIMAT0003165	hsa-miR-665	ENSG00000213341	CHUK	protein_coding	chr10	101948384	101948390	101948384	101948390	-	27	0	AGO1,AGO1-4,AGO2,AGO3,AGO4	1	0	0	0	0	0	0	5
MIMAT0003215	hsa-miR-873-5p	ENSG00000213341	CHUK	protein_coding	chr10	101948912	101948917	101948912	101948917	-	2	0	AGO1-4,AGO2	1	0	0	0	0	0	0	1
MIMAT0003218	hsa-miR-374b-3p	ENSG00000213341	CHUK	protein_coding	chr10	101948447	101948452	101948447	101948452	-	4	0	AGO1-4,AGO2	1	0	0	0	0	0	0	3
MIMAT0003241	hsa-miR-301b-3p	ENSG00000213341	CHUK	protein_coding	chr10	101948206	101948211	101948206	101948211	-	3	0	AGO1-4,AGO2	1	0	0	0	0	0	0	4
MIMAT0003241	hsa-miR-208b-3p	ENSG00000213341	CHUK	protein_coding	chr10	101949141	101949146	101949141	101949146	-	1	0	AGO2	1	0	0	0	0	0	0	4
MIMAT0003242	hsa-miR-942-5p	ENSG00000213341	CHUK	protein_coding	chr10	101948527	101948533	101948527	101948533	-	3	0	AGO2	1	0	0	0	0	0	0	1
MIMAT0003244	hsa-miR-944	ENSG00000213341	CHUK	protein_coding	chr10	101948594	101948599	101948594	101948599	-	2	0	AGO2	1	0	0	0	0	0	0	1
MIMAT0003258	hsa-miR-1323	ENSG00000213341	CHUK	protein_coding	chr10	101948474	101948480	101948473	101948494	-	3	0	AGO1-4,AGO2	1	0	0	0	1	0	0	7
MIMAT0003294	hsa-miR-1179	ENSG00000213341	CHUK	protein_coding	chr10	101949284	101949289	101949282	101949310	-	6	0	AGO1-4,AGO2	2	0	1	1	0	0	0	2
MIMAT0003311	hsa-miR-548o-3p	ENSG00000213341	CHUK	protein_coding	chr10	101948191	101948196	101948190	101948218	-	5	0	AGO1-4,AGO2	1	0	0	1	0	0	0	2
MIMAT0003311	hsa-miR-2681-5p	ENSG00000213341	CHUK	protein_coding	chr10	101948564	101948570	101948563	101948591	-	3	0	AGO2	1	0	0	1	0	0	0	2
MIMAT0003312	hsa-miR-3121-3p	ENSG00000213341	CHUK	protein_coding	chr10	101948367	101948373	101948367	101948374	-	8	0	AGO1-4,AGO2	1	0	1	0	0	0	0	2
MIMAT0003329	hsa-miR-3145-3p	ENSG00000213341	CHUK	protein_coding	chr10	101949217	101949222	101949216	101949236	-	2	0	AGO2	1	0	0	0	1	0	0	4
MIMAT0003331	hsa-miR-3163	ENSG00000213341	CHUK	protein_coding	chr10	101948139	101948167	101948139	101948167	-	1	0	AGO1-4	0	0	0	1	0	0	0	7
MIMAT0003331	hsa-miR-514b-3p	ENSG00000213341	CHUK	protein_coding	chr10	101949010	101949016	101949009	101949037	-	2	0	AGO1-4,AGO2	1	0	1	1	0	0	0	7
MIMAT0003332	hsa-miR-3617-5p	ENSG00000213341	CHUK	protein_coding	chr10	101948662	101948668	101948661	101948689	-	5	0	AGO1,AGO2	1	0	0	1	0	1	0	9
MIMAT0003332	hsa-miR-23c	ENSG00000213341	CHUK	protein_coding	chr10	101948726	101948731	101948725	101948753	-	1	0	AGO2	1	0	0	1	0	0	0	9
MIMAT0003393	hsa-miR-374c-5p	ENSG00000213341	CHUK	protein_coding	chr10	101948559	101948564	101948559	101948564	-	4	0	AGO1,AGO2	1	0	0	0	0	0	0	4
MIMAT0003879	hsa-miR-4428	ENSG00000213341	CHUK	protein_coding	chr10	101948885	101948890	101948885	101948890	-	6	0	AGO1,AGO1-4,AGO2	1	0	0	0	0	0	0	3
MIMAT0003885	hsa-miR-4458	ENSG00000213341	CHUK	protein_coding	chr10	101948536	101948541	101948536	101948541	-	3	0	AGO1,AGO2	1	0	0	0	0	0	0	4
MIMAT0003885	hsa-miR-4500	ENSG00000213341	CHUK	protein_coding	chr10	101948841	101948847	101948840	101948862	-	2	0	AGO1-4,AGO2	1	0	0	0	1	0	0	4
MIMAT0004593	hsa-miR-4676-3p	ENSG00000213341	CHUK	protein_coding	chr10	101948180	101948186	101948179	101948207	-	3	0	AGO1-4,AGO2	0	0	0	1	0	1	1	4
MIMAT0004593	hsa-miR-3529-5p	ENSG00000213341	CHUK	protein_coding	chr10	101978534	101978562	101978534	101978562	-	1	0	AGO1-4	0	0	0	1	0	0	0	4
MIMAT0004597	hsa-miR-4766-5p	ENSG00000213341	CHUK	protein_coding	chr10	101948344	101948350	101948344	101948350	-	3	0	AGO1-4,AGO2	1	0	0	0	0	0	0	7
MIMAT0004605	hsa-miR-5687	ENSG00000213341	CHUK	protein_coding	chr10	101948337	101948344	101948337	101948344	-	3	0	AGO1-4,AGO2	1	0	0	0	0	0	0	5
MIMAT0004605	hsa-miR-374c-3p	ENSG00000213341	CHUK	protein_coding	chr10	101948362	101948367	101948362	101948367	-	7	0	AGO1-4,AGO2	1	0	0	0	0	0	0	5
MIMAT0004683	hsa-miR-892c-3p	ENSG00000213341	CHUK	protein_coding	chr10	101948693	101948698	101948692	101948713	-	2	0	AGO2	1	0	0	0	1	0	0	3
