# Supplementary material for: A novel lncRNA-miRNA-mRNA triple network identifies lncRNA XIST as a biomarker for acute myocardial infarction
Source: Aging (Albany NY). 2022 May 10;14(9):4085–106. doi: 10.18632/aging.204075 (PMC9134965; doi:10.18632/aging.204075)
Supplement: Supplementary Table 11 [file aging-14-204075-s012.xls]

## Sheet: Supplementary Table11
Supplementary Table 11. All of miRNAs that were predicted to bind to the lncRNA XIST.
miRNAid	miRNAname	geneID	geneName	geneType	chromosome	start	end	strand	clipExpNum	degraExpNum	RBP	merClass	miRseq	align	targetSeq	pancancerNum
MIMAT0000436	hsa-miR-144-3p	ENSG00000229807	XIST	lincRNA	chrX	73040498	73040517	-	10	0	AGO2	7mer-m8	ucaUGUAGUAGAUAUGACAu	| || | ||||||||	guaAAAUAAAAUAUACUGUu	4
MIMAT0016895	hsa-miR-2355-5p	ENSG00000229807	XIST	lincRNA	chrX	73040530	73040550	-	12	0	AGO1,AGO2,AGO3	7mer-m8	aacagguaacaUAGACCCCUa	| |||||||	caauugaaacaAACUGGGGAg	5
MIMAT0003879	hsa-miR-758-3p	ENSG00000229807	XIST	lincRNA	chrX	73040547	73040570	-	9	0	AGO1,AGO2	7mer-m8	ccaaucaccuGGUC--CAGUGUUu	|:|| |||||||	cuuaagccauCUAGAUGUCACAAu	2
MIMAT0002805	hsa-miR-489-3p	ENSG00000229807	XIST	lincRNA	chrX	73040550	73040568	-	9	0	AGO1,AGO2	7mer-m8	cgaCGGCAUAUACACUACAGUg	||| | || |||||||	uaaGCCAUCUA---GAUGUCAc	2
MIMAT0000428	hsa-miR-135a-5p	ENSG00000229807	XIST	lincRNA	chrX	73040560	73040582	-	9	0	AGO1,AGO2	7mer-m8	agUGUAUCCUUAUUUUUCGGUAu	| | || ||| |||||||	ccAGAAAGUAAUCUUAAGCCAUc	2
MIMAT0000758	hsa-miR-135b-5p	ENSG00000229807	XIST	lincRNA	chrX	73040560	73040582	-	9	0	AGO1,AGO2	7mer-m8	agUGUAUCCUUACUUUUCGGUAu	| | || ||| |||||||	ccAGAAAGUAAUCUUAAGCCAUc	4
MIMAT0003165	hsa-miR-545-3p	ENSG00000229807	XIST	lincRNA	chrX	73040621	73040642	-	6	0	AGO2	7mer-m8	cguguguuAUUUACAAACGACu	|:|:| |||||||	aucucuuuUGAGUCUUUGCUGu	0
MIMAT0004916	hsa-miR-888-5p	ENSG00000229807	XIST	lincRNA	chrX	73040629	73040649	-	6	0	AGO2	7mer-m8	acUGACUGUCGA-AAAACUCAu	:| || | || ||||||||	auGCAGA-AUCUCUUUUGAGUc	1
MIMAT0005788	hsa-miR-513b-5p	ENSG00000229807	XIST	lincRNA	chrX	73040660	73040683	-	9	0	AGO1,AGO2	8mer	uaUUUACUGUGGA--GGAACACUu	::| ||| |:| |||||||	auGGAAGACUCUUGAACUUGUGAa	0
MIMAT0015008	hsa-miR-3140-3p	ENSG00000229807	XIST	lincRNA	chrX	73040691	73040710	-	15	0	AGO1,AGO2	7mer-m8	ugAUGGACUUAAGGGUUUUCGa	|| :| | |:||||||||	gaUAAUUUA--UUCCAAAAGCu	3
MIMAT0019036	hsa-miR-4500	ENSG00000229807	XIST	lincRNA	chrX	73040713	73040729	-	17	1	AGO1,AGO2,AGO3	8mer	uucuuuGAUGAUGGAGu	|| |||||||	auugucCUUCUACCUCa	0
MIMAT0018980	hsa-miR-4458	ENSG00000229807	XIST	lincRNA	chrX	73040713	73040731	-	17	1	AGO1,AGO2,AGO3	8mer	aagAAGGUGUGGAUGGAGa	|| : | :|||||||	ucaUUGUCCUUCUACCUCa	0
MIMAT0000096	hsa-miR-98-5p	ENSG00000229807	XIST	lincRNA	chrX	73040713	73040732	-	17	1	AGO1,AGO2,AGO3	8mer	uuGUUAUGUUGAAUGAUGGAGu	|| |:: ||| |||||||	guCAUUGU-CCUU-CUACCUCa	3
MIMAT0000063	hsa-let-7b-5p	ENSG00000229807	XIST	lincRNA	chrX	73040713	73040733	-	17	1	AGO1,AGO2,AGO3	8mer	uuGGUGUGUUGGAUGAUGGAGu	:||: :: ||| |||||||	cgUCAU-UGUCCUUCUACCUCa	1
MIMAT0000064	hsa-let-7c-5p	ENSG00000229807	XIST	lincRNA	chrX	73040713	73040733	-	17	1	AGO1,AGO2,AGO3	8mer	uuGGUAUGUUGGAUGAUGGAGu	:||| :: ||| |||||||	cgUCAU-UGUCCUUCUACCUCa	4
MIMAT0000062	hsa-let-7a-5p	ENSG00000229807	XIST	lincRNA	chrX	73040713	73040734	-	17	1	AGO1,AGO2,AGO3	8mer	uugauauguuGGAUGAUGGAGu	||| |||||||	ucgucauuguCCUUCUACCUCa	1
MIMAT0000065	hsa-let-7d-5p	ENSG00000229807	XIST	lincRNA	chrX	73040713	73040734	-	17	1	AGO1,AGO2,AGO3	8mer	uugauacguuGGAUGAUGGAGa	||| |||||||	ucgucauuguCCUUCUACCUCa	4
MIMAT0000066	hsa-let-7e-5p	ENSG00000229807	XIST	lincRNA	chrX	73040713	73040734	-	17	1	AGO1,AGO2,AGO3	8mer	uugauauguuGGAGGAUGGAGu	|||:|||||||	ucgucauuguCCUUCUACCUCa	2
MIMAT0000067	hsa-let-7f-5p	ENSG00000229807	XIST	lincRNA	chrX	73040713	73040734	-	17	1	AGO1,AGO2,AGO3	8mer	uugauauguuaGAUGAUGGAGu	|| |||||||	ucgucauugucCUUCUACCUCa	1
MIMAT0000414	hsa-let-7g-5p	ENSG00000229807	XIST	lincRNA	chrX	73040713	73040734	-	17	1	AGO1,AGO2,AGO3	8mer	uugacauguuuGAUGAUGGAGu	|| |||||||	ucgucauugucCUUCUACCUCa	4
MIMAT0000415	hsa-let-7i-5p	ENSG00000229807	XIST	lincRNA	chrX	73040713	73040734	-	17	1	AGO1,AGO2,AGO3	8mer	uugucguguuuGAUGAUGGAGu	|| |||||||	ucgucauugucCUUCUACCUCa	2
MIMAT0003267	hsa-miR-599	ENSG00000229807	XIST	lincRNA	chrX	73040748	73040767	-	10	0	AGO1,AGO2	7mer-m8	caaacuAUUUGACUGUGUUg	|| :| |||||||	ugcuuuUAUGCAGACACAAg	0
MIMAT0015037	hsa-miR-3163	ENSG00000229807	XIST	lincRNA	chrX	73040812	73040833	-	5	0	AGO1,AGO2	7mer-m8	cagaaugacgggaGUAAAAUAu	||||||||	aagaauaagagaaCAUUUUAUc	0
MIMAT0000232	hsa-miR-199a-3p	ENSG00000229807	XIST	lincRNA	chrX	73040840	73040861	-	5	0	AGO1,AGO2	8mer	auugguuacacgucUGAUGACa	|||||||	cuggcaucacuaccACUACUGa	3
MIMAT0004563	hsa-miR-199b-3p	ENSG00000229807	XIST	lincRNA	chrX	73040840	73040861	-	5	0	AGO1,AGO2	8mer	auugguuacacgucUGAUGACa	|||||||	cuggcaucacuaccACUACUGa	3
MIMAT0014992	hsa-miR-3129-5p	ENSG00000229807	XIST	lincRNA	chrX	73040840	73040862	-	5	0	AGO1,AGO2	8mer	uuugguUAGAGAU-GUGAUGACg	||| ||| ||||||||	ucuggcAUCACUACCACUACUGa	2
MIMAT0004763	hsa-miR-488-3p	ENSG00000229807	XIST	lincRNA	chrX	73040867	73040887	-	6	0	AGO2	7mer-m8	cuGGUUCUUUAUCGGAAAGUu	|:|| |: |||||||	aaCUAAAAGCCUUCCUUUCAc	1
MIMAT0016895	hsa-miR-30c-5p	ENSG00000229807	XIST	lincRNA	chrX	73040924	73040946	-	6	0	AGO2	7mer-m8	aacaGGUAACA--UAGACCCCUa	|| || | | |||||||	caccCCUUUCUUCAGCUGGGGAu	5
MIMAT0004763	hsa-miR-30a-5p	ENSG00000229807	XIST	lincRNA	chrX	73040973	73040992	-	2	0	AGO2	8mer	cuGGUUCUUUAUCGGAAAGUu	::|| : || |||||||	uaUUAAUGUUUA-CCUUUCAa	1
MIMAT0000244	hsa-miR-30d-5p	ENSG00000229807	XIST	lincRNA	chrX	73040979	73040999	-	2	0	AGO2	7mer-m8	cgACUCUCACAUCCUACAAAUGu	||| | || ||||||||	uuUGAAAUAUUA--AUGUUUACc	1
MIMAT0000087	hsa-miR-30b-5p	ENSG00000229807	XIST	lincRNA	chrX	73040979	73041000	-	2	0	AGO2	7mer-m8	gaaggucagcuccUACAAAUGu	||||||||	auuugaaauauuaAUGUUUACc	0
MIMAT0000245	hsa-miR-30e-5p	ENSG00000229807	XIST	lincRNA	chrX	73040979	73041000	-	2	0	AGO2	7mer-m8	gaaggucagccccUACAAAUGu	||||||||	auuugaaauauuaAUGUUUACc	0
MIMAT0000420	hsa-miR-3200-3p	ENSG00000229807	XIST	lincRNA	chrX	73040979	73041000	-	2	0	AGO2	7mer-m8	ucgacucacauccUACAAAUGu	||||||||	auuugaaauauuaAUGUUUACc	3
MIMAT0000692	hsa-miR-154-3p	ENSG00000229807	XIST	lincRNA	chrX	73040979	73041000	-	2	0	AGO2	7mer-m8	gaaggucaguuccUACAAAUGu	||||||||	auuugaaauauuaAUGUUUACc	0
MIMAT0015085	hsa-miR-487a-3p	ENSG00000229807	XIST	lincRNA	chrX	73041063	73041083	-	6	0	AGO2	7mer-m8	gucuggaCUCAUCGCGUUCCAc	||| :| |||||||	auuggugGAG-GGAGCAAGGUu	2
MIMAT0000453	hsa-miR-380-3p	ENSG00000229807	XIST	lincRNA	chrX	73041081	73041099	-	6	0	AGO2	7mer-m8	uuaUCCAGUUGGCACAUACUAa	| ||||| |||||||	uaaAUGUCAA---AGUAUGAUu	1
MIMAT0002178	hsa-miR-142-5p	ENSG00000229807	XIST	lincRNA	chrX	73041081	73041102	-	6	0	AGO2	7mer-m8	uugaccUACAGGGACAUACUAa	||||| |||||||	agauaaAUGUCAAAGUAUGAUu	2
MIMAT0000735	hsa-miR-5590-3p	ENSG00000229807	XIST	lincRNA	chrX	73041122	73041142	-	6	0	AGO2	7mer-m8	uucuacaccUGGUAUAAUGUAu	:||| |||||||	cuauagcaaGCCA-AUUACAUc	2
MIMAT0000433	hsa-miR-6852-3p	ENSG00000229807	XIST	lincRNA	chrX	73041186	73041206	-	6	3	AGO2	7mer-m8	ucaucacgaaagaUGAAAUAc	|||||||	ucaaaagaagaggACUUUAUu	3
MIMAT0022300	hsa-miR-3909	ENSG00000229807	XIST	lincRNA	chrX	73041186	73041206	-	6	3	AGO2	7mer-m8	aacggUAUGUACUUGAAAUAa	| | : |:|||||||	ucaaaAGAAGAGGACUUUAUu	1
MIMAT0027605	hsa-miR-624-3p	ENSG00000229807	XIST	lincRNA	chrX	73041191	73041207	-	6	3	AGO2	7mer-m8	gacuccUUGUCUCCUGu	|: |||||||	uucaaaAGAAGAGGACu	0
MIMAT0018183	hsa-miR-369-3p	ENSG00000229807	XIST	lincRNA	chrX	73041191	73041212	-	6	3	AGO2	7mer-m8	ucugacguccgggaUCUCCUGu	|||||||	uaugcuucaaaagaAGAGGACu	1
MIMAT0004807	hsa-miR-1224-5p	ENSG00000229807	XIST	lincRNA	chrX	73041291	73041310	-	2	0	AGO2	7mer-m8	uccauuaUGGUUAUGGAACAc	||:|| |||||||	cuuaucaACUAA-ACCUUGUg	0
MIMAT0000721	hsa-miR-541-5p	ENSG00000229807	XIST	lincRNA	chrX	73041323	73041343	-	2	1	AGO2	7mer-m8	uuucuaguuggUACAUAAUAa	| |||||||	acauuuuugaaAAGUAUUAUu	1
MIMAT0005458	hsa-miR-2355-3p	ENSG00000229807	XIST	lincRNA	chrX	73041355	73041373	-	7	0	AGO2	7mer-m8	gguggAGGGCUCAGGAGUg	|||: |||||||	caaaaUCCUUUGUCCUCAc	0
MIMAT0004919	hsa-miR-217	ENSG00000229807	XIST	lincRNA	chrX	73041363	73041386	-	7	0	AGO2	7mer-m8	ucACCCUGGCUGUCGUCUUAGGAAa	|| || :|| : || |||||||	guUGAGA-UGAGGACAAAAUCCUUu	1
MIMAT0017950	hsa-miR-6807-3p	ENSG00000229807	XIST	lincRNA	chrX	73041370	73041392	-	7	0	AGO2	8mer	uagagguuugUC-GUUCCUGUUa	|| ::|||||||	aucauuguugAGAUGAGGACAAa	5
MIMAT0000274	hsa-miR-490-3p	ENSG00000229807	XIST	lincRNA	chrX	73041403	73041423	-	4	0	AGO2	7mer-m8	agguuAGUCAAGGACUACGUCAu	||||||:| |||||||	auuguUCAGUUUC--AUGCAGUu	0
MIMAT0027515	hsa-miR-892c-5p	ENSG00000229807	XIST	lincRNA	chrX	73041403	73041425	-	4	0	AGO2	7mer-m8	gacccgguucguccuUACGUCAc	|||||||	aaauuguucaguuucAUGCAGUu	1
MIMAT0002806	hsa-miR-4677-3p	ENSG00000229807	XIST	lincRNA	chrX	73041426	73041447	-	8	0	AGO2	7mer-m8	gucguaccucagGAGGUCCAAc	|||||||||	gaacauuaccagCUCCAGGUUu	1
MIMAT0025857	hsa-miR-191-5p	ENSG00000229807	XIST	lincRNA	chrX	73041456	73041476	-	8	0	AGO2	7mer-m8	acuGACCGUGGAAAGACUUAu	||| | :: ||||||||	aacCUGCCUUUGUUCUGAAUu	0
MIMAT0019761	hsa-miR-944	ENSG00000229807	XIST	lincRNA	chrX	73041528	73041551	-	7	0	AGO2	8mer	ucauCAAGAAACCA--GAGUGUCu	|||:|| | |||||||	uuccGUUUUUAAAUCACUCACAGa	4
MIMAT0000440	hsa-miR-6509-3p	ENSG00000229807	XIST	lincRNA	chrX	73041544	73041569	-	7	0	AGO2	7mer-m8	guCGA--CGAAA-ACCCUAAGGCAAc	||| ||||| |||||||	ugGCUGGGCUUUGACCUUUUCCGUUu	3
MIMAT0004987	hsa-miR-656-3p	ENSG00000229807	XIST	lincRNA	chrX	73041619	73041639	-	6	0	AGO2	7mer-m8	gaguaggcuACAUGUUAUUAAa	|| | |||||||	aauaaaaauUGGA-AAUAAUUg	1
MIMAT0025475	hsa-miR-129-1-3p	ENSG00000229807	XIST	lincRNA	chrX	73041683	73041705	-	4	0	AGO2	7mer-m8	uuUAAUC-CAUCACCGUCACCUu	| ||| || | |||||||	auAGUAGAAUAAUAUCAGUGGAu	0
MIMAT0003332	hsa-miR-129-2-3p	ENSG00000229807	XIST	lincRNA	chrX	73041690	73041710	-	6	0	AGO2	7mer-m8	ucuccaACUGACAUAUUAUAa	| :: | |||||||	uuuuuaUAGUAGAAUAAUAUc	3
MIMAT0004548	hsa-miR-526b-5p	ENSG00000229807	XIST	lincRNA	chrX	73041709	73041730	-	6	3	AGO2	7mer-m8	uaugaaaaaccccaUUCCCGAa	|||||||	caaaucugcucaagAAGGGCUu	0
MIMAT0004605	hsa-miR-136-5p	ENSG00000229807	XIST	lincRNA	chrX	73041709	73041730	-	6	3	AGO2	7mer-m8	uacgaaaaaccccaUUCCCGAa	|||||||	caaaucugcucaagAAGGGCUu	2
MIMAT0002835	hsa-miR-3200-5p	ENSG00000229807	XIST	lincRNA	chrX	73041715	73041738	-	6	4	AGO2	8mer	ugucuuucacgaAGG-GAGUUCUc	||: |||||||	uuuaucaucaaaUCUGCUCAAGAa	1
MIMAT0000448	hsa-miR-4766-5p	ENSG00000229807	XIST	lincRNA	chrX	73041798	73041821	-	6	1	AGO2	8mer	agguaguaGUUUUG-UUUACCUCa	|| |:| ||||||||	agauaacgCAUAGCAAAAUGGAGa	2
MIMAT0017392	hsa-miR-34b-5p	ENSG00000229807	XIST	lincRNA	chrX	73041817	73041838	-	6	0	AGO2	8mer	uggaacacgcggAAGAGUCUAa	| |||||||	uuucagaaacaaUCCUCAGAUa	0
MIMAT0019917	hsa-miR-2682-5p	ENSG00000229807	XIST	lincRNA	chrX	73041832	73041851	-	8	0	AGO2	8mer	uugUGGUUGACGAGAAAGUCu	| :|: | |||||||||	cuaAAUAGAU-CUCUUUCAGa	1
MIMAT0000685	hsa-miR-449c-5p	ENSG00000229807	XIST	lincRNA	chrX	73041849	73041871	-	6	2	AGO2	8mer	guuaGUCGAU-UACUGUGACGGAu	|| || || |||||||||	cugaCACAUACAU-ACACUGCCUa	3
MIMAT0013517	hsa-miR-34a-5p	ENSG00000229807	XIST	lincRNA	chrX	73041849	73041871	-	6	2	AGO2	8mer	cugcagacuUGUCAGUGACGGAc	||| ||||||||	cugacacauACAUACACUGCCUa	1
MIMAT0010251	hsa-miR-34c-5p	ENSG00000229807	XIST	lincRNA	chrX	73041849	73041873	-	6	2	AGO2	8mer	ugucggcgaucguUAUGUGACGGAu	|||||||||||	ugcugacacauacAUACACUGCCUa	0
MIMAT0000255	hsa-miR-449a	ENSG00000229807	XIST	lincRNA	chrX	73041850	73041872	-	6	2	AGO2	7mer-m8	uguugGUCGAU-UCUGUGACGGu	|| || | ||||||||	gcugaCACAUACAUACACUGCCu	5
MIMAT0000686	hsa-miR-449b-5p	ENSG00000229807	XIST	lincRNA	chrX	73041850	73041872	-	6	2	AGO2	7mer-m8	cguuaGUCGAUUGAUGUGACGGa	|| || |||||||||	gcugaCACAUACAUACACUGCCu	1
MIMAT0001541	hsa-miR-3924	ENSG00000229807	XIST	lincRNA	chrX	73041850	73041877	-	6	1	AGO2	7mer-m8	ugGU-CGAUUGU-----UAUGUGACGGu	|| |||:||| ||||||||||	uaCAUGCUGACACAUACAUACACUGCCu	0
MIMAT0003327	hsa-miR-3121-3p	ENSG00000229807	XIST	lincRNA	chrX	73041850	73041877	-	6	2	AGO2	7mer-m8	cgGU-CGAUUGU-----UAUGUGACGGa	|| |||:||| ||||||||||	uaCAUGCUGACACAUACAUACACUGCCu	1
MIMAT0018199	hsa-miR-873-3p	ENSG00000229807	XIST	lincRNA	chrX	73041857	73041878	-	6	2	AGO2	7mer-m8	ucaucgucAGUGUAUAUGUAUa	| ||| |||||||	uuacaugcUGACACAUACAUAc	0
MIMAT0014983	hsa-miR-370-3p	ENSG00000229807	XIST	lincRNA	chrX	73041893	73041913	-	4	2	AGO2	7mer-m8	acaggaaaCGGAUGAGAUAAAu	|::|: |||||||	uuuacaagGUUUG-UCUAUUUu	2
MIMAT0022717	hsa-miR-6893-3p	ENSG00000229807	XIST	lincRNA	chrX	73041971	73041990	-	6	0	AGO2	8mer	agggcccUUGAGUAGUCAGAGg	||| | |||||||	auucccaAACCC--CAGUCUCa	2
MIMAT0000722	hsa-miR-4428	ENSG00000229807	XIST	lincRNA	chrX	73042008	73042029	-	6	0	AGO2	8mer	ugguccaaggugggGUCGUCCg	|||||||	ugaccacugcugggCAGCAGGa	1
MIMAT0027687	hsa-miR-326	ENSG00000229807	XIST	lincRNA	chrX	73042008	73042029	-	6	0	AGO2	8mer	gaccguccacuUCCGUCGUCCc	:|||||||||	ugaccacugcuGGGCAGCAGGa	0
MIMAT0018943	hsa-miR-330-5p	ENSG00000229807	XIST	lincRNA	chrX	73042075	73042100	-	7	0	AGO1,AGO2	8mer	cgaGGUACAAGGGC----AGAGGAAc	::| ||| | | |||||||	uccUUAAGUUACAGGAACUCUCCUUa	0
MIMAT0000756	hsa-miR-605-3p	ENSG00000229807	XIST	lincRNA	chrX	73042251	73042270	-	6	0	AGO2	8mer	gaccuccuucccGGGUCUCc	|||||||	aaugcaugccuuCCCAGAGa	2
MIMAT0004693	hsa-miR-1271-5p	ENSG00000229807	XIST	lincRNA	chrX	73042251	73042276	-	6	0	AGO2	8mer	cggaUUCUGUGUCC----GGGUCUCu	|| |::|| | |||||||	gaaaAAAAUGCAUGCCUUCCCAGAGa	2
MIMAT0026621	hsa-miR-96-5p	ENSG00000229807	XIST	lincRNA	chrX	73042257	73042275	-	6	0	AGO2	7mer-m8	agaUUUAGAGUAUCACGGAAGa	||| : || |||||||	aaaAAAAUGCA---UGCCUUCc	0
MIMAT0000756	hsa-miR-1277-5p	ENSG00000229807	XIST	lincRNA	chrX	73042282	73042301	-	6	0	AGO2	8mer	gaccuccuuCCCGGGUCUCc	|| |||||||	aagguuuuuGGCCCCAGAGa	2
MIMAT0004693	hsa-miR-337-3p	ENSG00000229807	XIST	lincRNA	chrX	73042282	73042305	-	6	0	AGO2	8mer	cggAUUCU--GUGUCCGGGUCUCu	||||: : ::| |||||||	guaUAAGGUUUUUGGCCCCAGAGa	2
MIMAT0005796	hsa-miR-433-3p	ENSG00000229807	XIST	lincRNA	chrX	73042315	73042336	-	5	0	AGO2	7mer-m8	acucacgaacgaUCCACGGUUc	:||||||||	acaaauauauucGGGUGCCAAu	2
MIMAT0000095	hsa-miR-651-5p	ENSG00000229807	XIST	lincRNA	chrX	73042315	73042337	-	5	0	AGO2	7mer-m8	ucGUUUUUACACGAUCACGGUUu	|||| || | | :|||||||	uaCAAAUAUAUUCGGGUGCCAAu	2
MIMAT0022724	hsa-miR-522-3p	ENSG00000229807	XIST	lincRNA	chrX	73042325	73042349	-	8	0	AGO2	7mer-m8	uauGCAUGU-AUAUAUAUAUAUAAa	| | || | || | |||||||	auuCAUUCAUUCUACAAAUAUAUUc	0
MIMAT0000754	hsa-miR-224-3p	ENSG00000229807	XIST	lincRNA	chrX	73042378	73042399	-	7	0	AGO2	7mer-m8	cuuCUUUCCGUAGUAUAUCCUc	|:|| |:| ||||||||	cuuGGAAAGUAGAAUAUAGGAg	1
MIMAT0001627	hsa-miR-212-3p	ENSG00000229807	XIST	lincRNA	chrX	73042425	73042446	-	8	0	AGO2	7mer-m8	uguggcuccucgggUAGUACUa	|||||||	agaaaacaaaaaaaAUCAUGAc	2
MIMAT0003321	hsa-miR-132-3p	ENSG00000229807	XIST	lincRNA	chrX	73042448	73042469	-	5	0	AGO2	8mer	guuuucaguucgaaUAGGAUUu	|||||||	aaccauuuuguuaaAUCCUAAa	0
MIMAT0002868	hsa-miR-519e-5p	ENSG00000229807	XIST	lincRNA	chrX	73042461	73042482	-	7	0	AGO2	7mer-m8	ugUGAGAUUUCCCUUGGUAAAa	||| | | ||||||||	ugACUGUUAUCUCAACCAUUUu	4
MIMAT0009198	hsa-miR-515-5p	ENSG00000229807	XIST	lincRNA	chrX	73042461	73042487	-	7	0	AGO2	7mer-m8	acaUCAGUG---AUCCCG-UGGUAAAa	||| || || | |||||||	agaAGUGACUGUUAUCUCAACCAUUUu	2
MIMAT0000269	hsa-miR-532-5p	ENSG00000229807	XIST	lincRNA	chrX	73042474	73042494	-	7	0	AGO2	8mer	ccggcacugacCUCUGACAAu	| |||||||	aucaaacagaaGUGACUGUUa	4
MIMAT0000426	hsa-miR-577	ENSG00000229807	XIST	lincRNA	chrX	73042474	73042494	-	7	0	AGO2	8mer	gcugguaccgaCAUCUGACAAu	|| |||||||	aucaaacagaaGU-GACUGUUa	1
MIMAT0002828	hsa-miR-106b-5p	ENSG00000229807	XIST	lincRNA	chrX	73042534	73042555	-	8	1	AGO2	7mer-m8	cuuucACGAGGGAAAACCUCUu	| :||: |||||||	gcauuUAUUCUGACUUGGAGAu	0
MIMAT0002826	hsa-miR-17-5p	ENSG00000229807	XIST	lincRNA	chrX	73042534	73042562	-	8	1	AGO2	7mer-m8	gucUUUCACG-AAAGAA-----AACCUCUu	|||| || ||| || |||||||	ccaAAAG-GCAUUUAUUCUGACUUGGAGAu	1
MIMAT0002888	hsa-miR-20a-5p	ENSG00000229807	XIST	lincRNA	chrX	73042551	73042573	-	8	1	AGO2	7mer-m8	ugccaGGAUG-UGAGUUCCGUAc	:||:| | |||||||	auauaUCUGCUCCAAAAGGCAUu	3
MIMAT0003242	hsa-miR-93-5p	ENSG00000229807	XIST	lincRNA	chrX	73042781	73042799	-	15	0	AGO1,AGO2,AGO3	7mer-m8	guccAUGGUUAUAAAAUAGAu	||:| | |||||||	acuuUAUC--UCAUUUAUCUu	2
MIMAT0003242	hsa-miR-106a-5p	ENSG00000229807	XIST	lincRNA	chrX	73042790	73042814	-	18	0	AGO1,AGO2,AGO3	7mer-m8	guccaUGGUUAUA----AAAUAGAu	||||| :| |||||||	cguaaACCAAAGUGCACUUUAUCUc	2
MIMAT0022300	hsa-miR-20b-5p	ENSG00000229807	XIST	lincRNA	chrX	73042792	73042811	-	17	0	AGO1,AGO2,AGO3	7mer-m8	aacGGUAUGUACUUGAAAUAa	||| | :|| |||||||	aaaCCA-AAGUGCACUUUAUc	1
MIMAT0000433	hsa-miR-526b-3p	ENSG00000229807	XIST	lincRNA	chrX	73042792	73042812	-	18	0	AGO1,AGO2,AGO3	7mer-m8	ucaucacgaaagaUGAAAUAc	|||||||	uaaaccaaagugcACUUUAUc	3
MIMAT0000680	hsa-miR-519d-3p	ENSG00000229807	XIST	lincRNA	chrX	73042794	73042812	-	18	0	AGO1,AGO2,AGO3	8mer	uagacGUGACAGUCGUGAAAu	|| || |||||||	uaaacCAAAGU--GCACUUUa	5
MIMAT0000070	hsa-miR-519c-3p	ENSG00000229807	XIST	lincRNA	chrX	73042794	73042817	-	18	0	AGO1,AGO2,AGO3	8mer	gaUGGACGUGACAUU-CGUGAAAc	|| | || |: |||||||	agACGUAAACCAAAGUGCACUUUa	4
MIMAT0000075	hsa-miR-519b-3p	ENSG00000229807	XIST	lincRNA	chrX	73042794	73042817	-	18	0	AGO1,AGO2,AGO3	8mer	gaUGGACGUGAUAUU-CGUGAAAu	|| | || | |: |||||||	agACGUAAACCAAAGUGCACUUUa	3
MIMAT0000093	hsa-miR-519a-3p	ENSG00000229807	XIST	lincRNA	chrX	73042794	73042817	-	18	0	AGO1,AGO2,AGO3	8mer	gaUGGACGUGCUUGU-CGUGAAAc	|| | || || : |||||||	agACGUAAACCAAAGUGCACUUUa	3
MIMAT0000103	hsa-miR-9-5p	ENSG00000229807	XIST	lincRNA	chrX	73042794	73042817	-	18	0	AGO1,AGO2,AGO3	8mer	gaUGGACGUGACAUU-CGUGAAAa	|| | || |: |||||||	agACGUAAACCAAAGUGCACUUUa	3
MIMAT0001413	hsa-miR-299-5p	ENSG00000229807	XIST	lincRNA	chrX	73042794	73042817	-	18	0	AGO1,AGO2,AGO3	8mer	gaUGGACGU-GAUACUCGUGAAAc	|| | | | | | |||||||	agACGUAAACCAAAGUGCACUUUa	4
MIMAT0002836	hsa-miR-498	ENSG00000229807	XIST	lincRNA	chrX	73042794	73042817	-	18	0	AGO1,AGO2,AGO3	8mer	cggagAUUUUCCUU--CGUGAAAg	|||| || |||||||	agacgUAAACCAAAGUGCACUUUa	1
MIMAT0002853	hsa-miR-186-5p	ENSG00000229807	XIST	lincRNA	chrX	73042794	73042817	-	18	0	AGO1,AGO2,AGO3	8mer	gugagAUUU-CCCUC-CGUGAAAc	|||| || |||||||	agacgUAAACCAAAGUGCACUUUa	1
MIMAT0002832	hsa-miR-137	ENSG00000229807	XIST	lincRNA	chrX	73042795	73042818	-	18	0	AGO1,AGO2,AGO3	7mer-m8	uaggagAUUU--UUCUACGUGAAa	|||| || :|||||||	aagacgUAAACCAAAGUGCACUUu	1
MIMAT0002837	hsa-miR-5688	ENSG00000229807	XIST	lincRNA	chrX	73042795	73042818	-	18	0	AGO1,AGO2,AGO3	7mer-m8	uuggagAUUU--UCCUACGUGAAa	|||| | :|||||||	aagacgUAAACCAAAGUGCACUUu	0
MIMAT0002869	hsa-miR-495-3p	ENSG00000229807	XIST	lincRNA	chrX	73042795	73042818	-	18	0	AGO1,AGO2,AGO3	7mer-m8	ugugagAUUU--UCCUACGUGAAa	|||| | :|||||||	aagacgUAAACCAAAGUGCACUUu	3
MIMAT0000441	hsa-miR-4319	ENSG00000229807	XIST	lincRNA	chrX	73042802	73042824	-	18	0	AGO1,AGO2,AGO3	7mer-m8	aguaugucgaucuaUUGGUUUCu	||||||||	gcuugaaagacguaAACCAAAGu	2
MIMAT0002890	hsa-miR-125b-5p	ENSG00000229807	XIST	lincRNA	chrX	73042806	73042826	-	18	0	AGO1,AGO2,AGO3	8mer	uacauACACCCUGCCAUUUGGu	|| ||| |||||||	gugcuUGAAAGAC-GUAAACCa	2
MIMAT0002824	hsa-miR-125a-5p	ENSG00000229807	XIST	lincRNA	chrX	73042817	73042844	-	8	0	AGO2	8mer	cuUUUUGCG--GGGGA--C-CGAACUUu	|||::|| ::|:| | |||||||	auAAAGUGCUGUUCUUAAGUGCUUGAAa	1
MIMAT0000456	hsa-miR-374a-3p	ENSG00000229807	XIST	lincRNA	chrX	73042881	73042902	-	6	0	AGO2	7mer-m8	ucggGUUUUCCUCUUAAGAAAc	:|||| | :|||||||	gcaaUAAAAAAAAGAUUCUUUu	3
MIMAT0000429	hsa-miR-4525	ENSG00000229807	XIST	lincRNA	chrX	73042896	73042918	-	6	1	AGO2	8mer	gaugcgcauaagaAUUCGUUAUu	|:|||||||	acaggaagacauaUGAGCAAUAa	4
MIMAT0022479	hsa-miR-5010-5p	ENSG00000229807	XIST	lincRNA	chrX	73043018	73043038	-	5	0	AGO2	7mer-m8	cgacaaaauGUCCACAAACAAu	|||| |||||||	aaaagggcuCAGG-GUUUGUUc	1
MIMAT0002817	hsa-miR-216a-5p	ENSG00000229807	XIST	lincRNA	chrX	73043018	73043039	-	5	0	AGO2	7mer-m8	uucUUCACGUGGUACAAACAAa	||| || | : |||||||	uaaAAGGGCUCAGGGUUUGUUc	1
MIMAT0016870	hsa-miR-193a-5p	ENSG00000229807	XIST	lincRNA	chrX	73043024	73043040	-	4	0	AGO2	7mer-m8	caccgaaaCGAGUCCCu	||||||||	auaaaaggGCUCAGGGu	0
MIMAT0000423	hsa-miR-4640-5p	ENSG00000229807	XIST	lincRNA	chrX	73043024	73043044	-	6	0	AGO2	7mer-m8	aguguucaaUCCCAGAGUCCCu	|||| |||||||	acugauaaaAGGG-CUCAGGGu	3
MIMAT0000443	hsa-miR-4726-5p	ENSG00000229807	XIST	lincRNA	chrX	73043024	73043046	-	6	0	AGO2	7mer-m8	agUGUCCAAUUUCCCAGAGUCCCu	|| | | |||||| |||||||	agACUGAUAAAAGGG-CUCAGGGu	0
MIMAT0004548	hsa-miR-494-3p	ENSG00000229807	XIST	lincRNA	chrX	73043029	73043050	-	6	0	AGO2	7mer-m8	uaugaaaaaccccaUUCCCGAa	|||||||	caggagacugauaaAAGGGCUc	0
MIMAT0004605	hsa-miR-365a-3p	ENSG00000229807	XIST	lincRNA	chrX	73043029	73043050	-	6	0	AGO2	7mer-m8	uacgaaaaaccccaUUCCCGAa	|||||||	caggagacugauaaAAGGGCUc	2
MIMAT0004688	hsa-miR-365b-3p	ENSG00000229807	XIST	lincRNA	chrX	73043036	73043057	-	6	0	AGO2	8mer	uuaauguuaugUUAGACUAUUc	|: |||||||	uuaaagccaggAGACUGAUAAa	2
MIMAT0019064	hsa-miR-6835-3p	ENSG00000229807	XIST	lincRNA	chrX	73043081	73043102	-	6	0	AGO2	8mer	uuGGUCGUACGU--GUAGGGGGg	|:||: | || |||||||	ucCUAGU-UUCAGGAAUCCCCCa	1
MIMAT0021043	hsa-miR-4761-5p	ENSG00000229807	XIST	lincRNA	chrX	73043081	73043102	-	6	0	AGO2	8mer	uuaaaacGAGACGGUAGGGGGa	:|| | |||||||	uccuaguUUCAGGAAUCCCCCa	0
MIMAT0000273	hsa-miR-7-5p	ENSG00000229807	XIST	lincRNA	chrX	73043161	73043181	-	6	0	AGO2	8mer	aguGUCAACGGUCGACUCUAAu	|| ||||| :|||||||	acuCAAUUGCC-UUUGAGAUUa	0
MIMAT0004614	hsa-miR-129-5p	ENSG00000229807	XIST	lincRNA	chrX	73043181	73043201	-	6	0	AGO2	8mer	agUAGAGCGGGCGUUUCUGGGu	:||| |||| :|||||||	agGUCUGGCCC-AGAAGACCCa	2
MIMAT0019699	hsa-miR-450b-5p	ENSG00000229807	XIST	lincRNA	chrX	73043190	73043212	-	6	0	AGO2	8mer	ggguggucgacgagGGACCGGGu	:|||||||	guaaauuaaauaggUCUGGCCCa	0
MIMAT0019845	hsa-miR-342-3p	ENSG00000229807	XIST	lincRNA	chrX	73043190	73043212	-	6	0	AGO2	8mer	ggugagguccgaggAGACCGGGa	||||||||	guaaauuaaauaggUCUGGCCCa	0
MIMAT0002816	hsa-miR-4761-3p	ENSG00000229807	XIST	lincRNA	chrX	73043212	73043233	-	7	0	AGO1,AGO2	7mer-m8	cuccaaagggcacAUACAAAGu	||||||||	cucugcaagguacUAUGUUUCg	2
MIMAT0015085	hsa-miR-615-3p	ENSG00000229807	XIST	lincRNA	chrX	73043222	73043243	-	7	0	AGO1,AGO2	8mer	gucUGGACUCAUCG-CGUUCCAc	:||| | | | |||||||	aauGCCU-AUUCUCUGCAAGGUa	2
MIMAT0003332	hsa-miR-376c-3p	ENSG00000229807	XIST	lincRNA	chrX	73043246	73043270	-	7	0	AGO1,AGO2	7mer-m8	ucUCCAACUGACA----UAUUAUAa	:| ||||:||| |||||||	uuGGUUUGAUUGUUUAAAUAAUAUu	3
MIMAT0000710	hsa-miR-361-3p	ENSG00000229807	XIST	lincRNA	chrX	73043303	73043324	-	6	0	AGO2	8mer	uauuccuaaaaAUCCCCGUAAu	|: |||||||	gauaagagagaUGAGGGCAUUa	2
MIMAT0022834	hsa-miR-382-3p	ENSG00000229807	XIST	lincRNA	chrX	73043303	73043324	-	6	0	AGO2	8mer	uauuccuaaaaAUCCCCGUAAu	|: |||||||	gauaagagagaUGAGGGCAUUa	2
MIMAT0027571	hsa-miR-5579-3p	ENSG00000229807	XIST	lincRNA	chrX	73043383	73043405	-	6	0	AGO2	7mer-m8	gacccuCUGUCUUUUCACGAAAa	| | |:: |||||||	auaaauGCCUCAGGCGUGCUUUu	0
MIMAT0019908	hsa-miR-590-5p	ENSG00000229807	XIST	lincRNA	chrX	73043434	73043454	-	7	0	AGO2	8mer	ccAGUCCGUACGUGUGGAACa	| | :| | |||||||	agUGAAUUAGACCCACCUUGa	1
MIMAT0000252	hsa-miR-21-5p	ENSG00000229807	XIST	lincRNA	chrX	73043482	73043505	-	6	0	AGO2	8mer	ugUUGUUUUA-GUGAUCAGAAGGu	|||||::| : |:|||||||	aaAACAAGGUGUUGUGGUCUUCCa	3
MIMAT0000242	hsa-miR-324-5p	ENSG00000229807	XIST	lincRNA	chrX	73043502	73043522	-	6	0	AGO2	8mer	cguucgggucuGGCGUUUUUc	::|||||||	auggaaaauuuUUGCAAAAAa	1
MIMAT0004909	hsa-miR-4766-3p	ENSG00000229807	XIST	lincRNA	chrX	73043504	73043526	-	6	0	AGO2	8mer	auaaguCCUUGU-AUAACGUUUu	|||| | | |||||||	ggagauGGAAAAUUUUUGCAAAa	3
MIMAT0000753	hsa-miR-625-3p	ENSG00000229807	XIST	lincRNA	chrX	73043663	73043685	-	6	1	AGO2	8mer	ugcccaCGCUAAAGACACACUCu	|: || | |||||||	aaugaaGUAAUAUAGGUGUGAGa	1
MIMAT0019761	hsa-miR-188-5p	ENSG00000229807	XIST	lincRNA	chrX	73043690	73043712	-	6	1	AGO2	8mer	ucaucAAGAAACCA-GAGUGUCu	|| | || |||||||	uaucaUUAUAGAGUGCUCACAGa	4
MIMAT0019909	hsa-miR-6866-3p	ENSG00000229807	XIST	lincRNA	chrX	73043730	73043750	-	6	1	AGO2	8mer	ccuguuucacgcGUACGGGAg	||||||||	ggcucggaacuaCAUGCCCUa	0
MIMAT0003283	hsa-miR-374a-5p	ENSG00000229807	XIST	lincRNA	chrX	73043743	73043764	-	6	3	AGO2	8mer	uucucccucugggUCCGAGCCu	:|||||||	auuacuuucugugGGGCUCGGa	4
MIMAT0000720	hsa-miR-374b-5p	ENSG00000229807	XIST	lincRNA	chrX	73043827	73043847	-	3	0	AGO2	7mer-m8	ugcaccuuaaaggAGAUACAa	|||||||	ccuacaacagagaUCUAUGUg	1
MIMAT0004682	hsa-miR-485-3p	ENSG00000229807	XIST	lincRNA	chrX	73043873	73043896	-	4	0	AGO1,AGO2	7mer-m8	uuuAGUCU-UAGUGUGGACCCCCu	|:||| || ||| |||||||	uccUUAGAGAUAACAACUGGGGGc	0
MIMAT0022697	hsa-miR-539-3p	ENSG00000229807	XIST	lincRNA	chrX	73043911	73043932	-	5	0	AGO2	7mer-m8	uucacaACAGGC-ACUUACUAa	| ||:| ||||||||	aagcuaUAUCUGCUGAAUGAUc	1
MIMAT0022270	hsa-miR-29a-3p	ENSG00000229807	XIST	lincRNA	chrX	73043926	73043950	-	5	0	AGO2	7mer-m8	cuaGACCAUGAGGA---AUUCGAUu	||| || | | |||||||	aaaCUGCCACCCAUAUAUAAGCUAu	1
MIMAT0003258	hsa-miR-29c-3p	ENSG00000229807	XIST	lincRNA	chrX	73043927	73043946	-	5	0	AGO2	8mer	gacGUGAAAAUACUUAUUCGAg	||| ||| |||||||	ugcCACCCAUAU--AUAAGCUa	6
MIMAT0000076	hsa-miR-29b-3p	ENSG00000229807	XIST	lincRNA	chrX	73043927	73043947	-	5	0	AGO2	8mer	aguuGUAGUCAGACUAUUCGAu	|| | | | |||||||	cugcCACCCAUAU-AUAAGCUa	7
MIMAT0000761	hsa-miR-421	ENSG00000229807	XIST	lincRNA	chrX	73044020	73044041	-	4	0	AGO2	8mer	ugugGUUACGGGAUCCCCUACGc	| | || :| ||||||||	auugCUAGGCAUU-GGGGAUGCa	5
MIMAT0019918	hsa-miR-3174	ENSG00000229807	XIST	lincRNA	chrX	73044034	73044054	-	4	0	AGO2	7mer-m8	aagguuuucucguUAACGAUa	|||||||	gugugccaaucucAUUGCUAg	1
MIMAT0005796	hsa-miR-580-3p	ENSG00000229807	XIST	lincRNA	chrX	73044045	73044067	-	4	0	AGO2	7mer-m8	acUCACGA-ACGAUCCACGGUUc	||| | | :|: |||||||	guAGUUAUCUAUUGUGUGCCAAu	2
MIMAT0000095	hsa-miR-302e	ENSG00000229807	XIST	lincRNA	chrX	73044045	73044068	-	4	0	AGO2	7mer-m8	ucGUUUUUACACGAU-CACGGUUu	:|: || | :|: |||||||	agUAGUUAUCUAUUGUGUGCCAAu	2
MIMAT0004808	hsa-miR-520e	ENSG00000229807	XIST	lincRNA	chrX	73044065	73044087	-	6	0	AGO2	8mer	acuccccCUUUC-AAGAUAUCAg	||| | |||||||	gucugaaGAAUGCCACUAUAGUa	3
MIMAT0000457	hsa-miR-302a-3p	ENSG00000229807	XIST	lincRNA	chrX	73044092	73044113	-	6	0	AGO2	7mer-m8	gggAGGUG-GUACGUUCCCUAc	| |:| :| |||||||||	gaaUACGCAUACGCAAGGGAUu	2
MIMAT0027633	hsa-miR-302b-3p	ENSG00000229807	XIST	lincRNA	chrX	73044092	73044116	-	6	0	AGO2	7mer-m8	gauCUCCUGUCUAU---UUCCCUAg	|| ||: ||| |||||||	uuuGAAUACGCAUACGCAAGGGAUu	0
MIMAT0000727	hsa-miR-302c-3p	ENSG00000229807	XIST	lincRNA	chrX	73044159	73044181	-	1	0	AGO2	7mer-m8	gugAAUAGUCCAAC-AUAAUAUu	||:| | | | |||||||	aaaUUGUAUGAUAGUUAUUAUAu	3
MIMAT0004955	hsa-miR-302d-3p	ENSG00000229807	XIST	lincRNA	chrX	73044159	73044182	-	1	0	AGO2	7mer-m8	gugaAUCGU-CCAAC-AUAAUAUa	| |:| | | | |||||||	aaaaUUGUAUGAUAGUUAUUAUAu	2
MIMAT0002178	hsa-miR-520b	ENSG00000229807	XIST	lincRNA	chrX	73044169	73044190	-	6	0	AGO2	8mer	uugaccuacaggGACAUACUAa	:||||||||	agguuuauaaaaUUGUAUGAUa	2
MIMAT0000453	hsa-miR-372-3p	ENSG00000229807	XIST	lincRNA	chrX	73044169	73044193	-	7	0	AGO1,AGO2	8mer	uuAUCCA---GUUGGCACAUACUAa	||||| :|| ||||||||	acUAGGUUUAUAAAAUUGUAUGAUa	1
MIMAT0002176	hsa-miR-373-3p	ENSG00000229807	XIST	lincRNA	chrX	73044170	73044191	-	6	0	AGO2	7mer-m8	ucucuccucucggcACAUACUg	|||||||	uagguuuauaaaauUGUAUGAu	1
MIMAT0022705	hsa-miR-520a-3p	ENSG00000229807	XIST	lincRNA	chrX	73044170	73044191	-	6	0	AGO2	7mer-m8	uuucuuuaacaggAACAUACUa	||||||||	uagguuuauaaaaUUGUAUGAu	2
MIMAT0000086	hsa-miR-520c-3p	ENSG00000229807	XIST	lincRNA	chrX	73044197	73044221	-	8	0	AGO1,AGO2	7mer-m8	auUGGCUAA---AGUCUACCACGAu	:::|||| ||| |||||||	cuGUUGAUUUUCUCACUUGGUGCUg	2
MIMAT0000681	hsa-miR-520d-3p	ENSG00000229807	XIST	lincRNA	chrX	73044197	73044221	-	8	0	AGO1,AGO2	7mer-m8	auUGGCUAA---AGUUUACCACGAu	:::|||| ||| |||||||	cuGUUGAUUUUCUCACUUGGUGCUg	1
MIMAT0000100	hsa-miR-520f-3p	ENSG00000229807	XIST	lincRNA	chrX	73044197	73044222	-	8	0	AGO1,AGO2	7mer-m8	uuGUGACUAA---AGUUUACCACGAu	:::||||| ||| |||||||	acUGUUGAUUUUCUCACUUGGUGCUg	2
MIMAT0003339	hsa-miR-3164	ENSG00000229807	XIST	lincRNA	chrX	73044214	73044240	-	9	0	AGO1,AGO2	7mer-m8	cgCG-GGU-UAAUUACA--GACAACUa	|| ||| || ||||| |||||||	agGCACCAUAUAAAUGUAACUGUUGAu	4
MIMAT0015051	hsa-miR-6820-3p	ENSG00000229807	XIST	lincRNA	chrX	73044325	73044351	-	4	0	AGO2	7mer-m8	ccgaGACGUA-GAGA---UUGAGUGAu	:||| | || | ||||||||	uugaUUGCCUACUAUGUGAACUCACUg	1
MIMAT0003245	hsa-miR-670-3p	ENSG00000229807	XIST	lincRNA	chrX	73044434	73044455	-	6	0	AGO2	7mer-m8	ggauuacuAAGUAGUAAGAGUu	| || |||||||	auugucucUACAAAAUUCUCAu	4
MIMAT0022270	hsa-miR-4661-5p	ENSG00000229807	XIST	lincRNA	chrX	73044458	73044479	-	6	0	AGO2	7mer-m8	cuagaccauGAGGAAUUCGAUu	:||: |||||||	aauaaaacuUUCUGUAAGCUAg	1
MIMAT0002176	hsa-miR-409-5p	ENSG00000229807	XIST	lincRNA	chrX	73044478	73044499	-	6	0	AGO2	8mer	ucucuccucucggcACAUACUg	|||||||	aauuugaugcuuucUGUAUGAa	1
MIMAT0022705	hsa-miR-545-5p	ENSG00000229807	XIST	lincRNA	chrX	73044478	73044503	-	6	0	AGO2	8mer	uuUCUUUAAC-AGGA---ACAUACUa	| || ||| | || |||||||	gaAAAAUUUGAUGCUUUCUGUAUGAa	2
MIMAT0005931	hsa-miR-3942-5p	ENSG00000229807	XIST	lincRNA	chrX	73044509	73044525	-	4	0	AGO2	7mer-m8	uucguaccUUCGUGAAu	||||||||	aaauuauaAAGCACUUg	0
MIMAT0002825	hsa-miR-4703-5p	ENSG00000229807	XIST	lincRNA	chrX	73044509	73044529	-	6	0	AGO2	7mer-m8	ggGAGUUUUUCCUUCGUGAAa	|| || | ||||||||	uuCUAAAUUAUAAAGCACUUg	1
MIMAT0000684	hsa-miR-877-5p	ENSG00000229807	XIST	lincRNA	chrX	73044509	73044530	-	6	0	AGO2	7mer-m8	aguGGUUUUGUACCUUCGUGAAu	|:||| :|| ||||||||	uuuCUAAAUUAU-AAAGCACUUg	2
MIMAT0000715	hsa-miR-1185-5p	ENSG00000229807	XIST	lincRNA	chrX	73044509	73044530	-	6	0	AGO2	7mer-m8	gauGAUUUUGUACCUUCGUGAAu	||||| :|| ||||||||	uuuCUAAAUUAU-AAAGCACUUg	0
MIMAT0000717	hsa-miR-3679-5p	ENSG00000229807	XIST	lincRNA	chrX	73044509	73044530	-	6	0	AGO2	7mer-m8	gguGACUUUGUACCUUCGUGAAu	|| || :|| ||||||||	uuuCUAAAUUAU-AAAGCACUUg	4
MIMAT0000718	hsa-miR-101-3p	ENSG00000229807	XIST	lincRNA	chrX	73044509	73044530	-	6	0	AGO2	7mer-m8	uguGAGUUUGUACCUUCGUGAAu	|| || :|| ||||||||	uuuCUAAAUUAU-AAAGCACUUg	0
MIMAT0002843	hsa-miR-524-5p	ENSG00000229807	XIST	lincRNA	chrX	73044509	73044531	-	6	0	AGO2	7mer-m8	ggGAGAUUU--UCCUUCGUGAAa	:|||||| | ||||||||	cuUUCUAAAUUAUAAAGCACUUg	3
MIMAT0000724	hsa-miR-520d-5p	ENSG00000229807	XIST	lincRNA	chrX	73044509	73044532	-	6	0	AGO2	7mer-m8	ugcGAG-UUUACAGCGUCGUGAAa	:|| |||| : |||||||	gcuUUCUAAAUUAUAAAGCACUUg	1
MIMAT0000726	hsa-miR-330-3p	ENSG00000229807	XIST	lincRNA	chrX	73044509	73044532	-	6	0	AGO2	7mer-m8	uguGGGGUUUUA-GCUUCGUGAAg	::|:||| | : ||||||||	gcuUUCUAAAUUAUAAAGCACUUg	2
MIMAT0002834	hsa-miR-502-3p	ENSG00000229807	XIST	lincRNA	chrX	73044509	73044532	-	6	0	AGO2	7mer-m8	ugucAGGUUU--CCCUUCGUGAAa	||:||| ||||||||	gcuuUCUAAAUUAUAAAGCACUUg	1
MIMAT0002846	hsa-miR-501-3p	ENSG00000229807	XIST	lincRNA	chrX	73044509	73044532	-	6	0	AGO2	7mer-m8	ugGGAGAUUU--UCCUUCGUGAAa	::|||||| | ||||||||	gcUUUCUAAAUUAUAAAGCACUUg	3
MIMAT0002856	hsa-miR-500a-3p	ENSG00000229807	XIST	lincRNA	chrX	73044509	73044532	-	6	0	AGO2	7mer-m8	uggguGGUUU-CU-CUUCGUGAAa	|:||| | ||||||||	gcuuuCUAAAUUAUAAAGCACUUg	1
MIMAT0002830	hsa-miR-1251-5p	ENSG00000229807	XIST	lincRNA	chrX	73044510	73044533	-	6	0	AGO2	7mer-m8	uuGGGAGAUUU--UCCUUCGUGAa	|::|||||| | |||||||	ugCUUUCUAAAUUAUAAAGCACUu	2
MIMAT0027571	hsa-miR-338-3p	ENSG00000229807	XIST	lincRNA	chrX	73044527	73044550	-	6	0	AGO2	7mer-m8	gacccUCUGUC-UUUUCACGAAAa	|| : | :|| |||||||	aauucAGCUUGCGAAUGUGCUUUc	0
MIMAT0015038	hsa-miR-2114-5p	ENSG00000229807	XIST	lincRNA	chrX	73044552	73044573	-	6	0	AGO2	7mer-m8	gcgguaaagggaaUUUCAGUGu	||||||||	gagauccagaccgAAAGUCACu	1
MIMAT0027541	hsa-miR-200b-3p	ENSG00000229807	XIST	lincRNA	chrX	73044552	73044573	-	6	0	AGO2	7mer-m8	gacaccGUCCCCUCUUCAGUGu	||| : |||||||	gagaucCAGACCGAAAGUCACu	1
MIMAT0026640	hsa-miR-429	ENSG00000229807	XIST	lincRNA	chrX	73044589	73044609	-	6	0	AGO2	8mer	aggaCUUACUUAUACUCCUUu	||: |:|||||||||	gaaaGAGCUAGUAUGAGGAAa	2
MIMAT0019729	hsa-miR-200c-3p	ENSG00000229807	XIST	lincRNA	chrX	73044597	73044622	-	9	3	AGO1,AGO2	8mer	caGUCC-UAGG---UGUCUCGAUCAa	|||| | || | |||||||||	ucCAGGUAACCAGGAAAGAGCUAGUa	6
MIMAT0001638	hsa-miR-2278	ENSG00000229807	XIST	lincRNA	chrX	73044611	73044633	-	7	3	AGO1,AGO2	8mer	uacGUUUCAACGAGCCCAUUGGa	:| | || : | |||||||	ugaUACAUUUUUCCAGGUAACCa	3
MIMAT0004785	hsa-miR-15b-5p	ENSG00000229807	XIST	lincRNA	chrX	73044656	73044678	-	2	0	AGO2	7mer-m8	aguagaUUAUUUGU-AAAUGACu	||| || | |||||||	uuaaacAAUCAAGACUUUACUGg	1
MIMAT0018358	hsa-miR-195-5p	ENSG00000229807	XIST	lincRNA	chrX	73044683	73044705	-	6	0	AGO2	7mer-m8	uaaAGUCC--AUUGUCAUAACGAa	| ||| |:|:| |||||||	augUAAGGAAUGAUA-UAUUGCUu	1
MIMAT0019801	hsa-miR-424-5p	ENSG00000229807	XIST	lincRNA	chrX	73044683	73044708	-	7	0	AGO1,AGO2	7mer-m8	ugaUAUAAACAUGAC---AUAACGAu	||:| | | || |||||||	cagAUGUAAGGAAUGAUAUAUUGCUu	0
MIMAT0022724	hsa-miR-497-5p	ENSG00000229807	XIST	lincRNA	chrX	73044686	73044707	-	7	0	AGO1,AGO2	7mer-m8	uaUGCAUGUAUAUAUAUAUAUAAa	|:||| | : ||: |||||||	agAUGUA-AGGAAUG-AUAUAUUg	0
MIMAT0022697	hsa-miR-16-5p	ENSG00000229807	XIST	lincRNA	chrX	73044691	73044710	-	7	0	AGO1,AGO2	8mer	uucaCAACAGGCACUUACUAa	| ||| | |||||||	uucaGAUGUAAG-GAAUGAUa	1
MIMAT0004949	hsa-miR-6838-5p	ENSG00000229807	XIST	lincRNA	chrX	73044715	73044734	-	7	0	AGO1,AGO2	7mer-m8	gggacgcgguAGAGGAGAUg	| |||||||	gaggaaaguuUAUCCUCUAu	2
MIMAT0005798	hsa-miR-15a-5p	ENSG00000229807	XIST	lincRNA	chrX	73044717	73044737	-	7	0	AGO1,AGO2	7mer-m8	uuguaugUUUCCCAUAGGAGa	|||| |||||||	uaagaggAAAGUUUAUCCUCu	1
MIMAT0018104	hsa-miR-153-3p	ENSG00000229807	XIST	lincRNA	chrX	73044717	73044739	-	7	0	AGO1,AGO2	7mer-m8	aggggaagggacgguAUAGGAGu	|||||||	aauaagaggaaaguuUAUCCUCu	0
MIMAT0000099	hsa-miR-1276	ENSG00000229807	XIST	lincRNA	chrX	73044765	73044786	-	6	0	AGO1,AGO2	8mer	aaGUCAAUAGUG-UCAUGACAu	||| |||: : :|||||||	acCAGCUAUUUUGGGUACUGUa	2
MIMAT0002849	hsa-miR-27a-3p	ENSG00000229807	XIST	lincRNA	chrX	73044869	73044885	-	3	0	AGO2	8mer	cucUUUCACGAAGGGAAACAUc	|||||| |||||||	auuAAAGUG-----CUUUGUAa	1
MIMAT0002855	hsa-miR-27b-3p	ENSG00000229807	XIST	lincRNA	chrX	73044869	73044888	-	5	0	AGO2	8mer	cuuucccgaaggGAAACAUc	|||||||	cauauuaaagugCUUUGUAa	1
MIMAT0000751	hsa-miR-381-3p	ENSG00000229807	XIST	lincRNA	chrX	73044871	73044894	-	5	0	AGO2	7mer-m8	agagACGUCCGG-CACACGAAACg	|||| :: ||||||||	aaggUGCAUAUUAAAGUGCUUUGu	1
MIMAT0027571	hsa-miR-300	ENSG00000229807	XIST	lincRNA	chrX	73044872	73044894	-	5	0	AGO2	7mer-m8	gaCCCUCUGUCUUUUCACGAAAa	|| : |:| ||||||||||	aaGGUGCAUAUUAAAGUGCUUUg	0
MIMAT0004775	hsa-miR-582-5p	ENSG00000229807	XIST	lincRNA	chrX	73044885	73044905	-	5	0	AGO2	8mer	acUUAGGAACGGGUCCACGUAa	|||:: | ||||||||	aaAAUUUCAG-AAAGGUGCAUa	3
MIMAT0004774	hsa-miR-4262	ENSG00000229807	XIST	lincRNA	chrX	73044885	73044906	-	5	0	AGO2	8mer	ucuuaggaacgggcCCACGUAa	|||||||	aaaaauuucagaaaGGUGCAUa	3
MIMAT0002871	hsa-miR-181c-5p	ENSG00000229807	XIST	lincRNA	chrX	73044886	73044906	-	5	0	AGO2	7mer-m8	gucUUAGGAACGGGUCCACGUa	|||:: | |||||||	aaaAAUUUCAG-AAAGGUGCAu	4
MIMAT0003245	hsa-miR-181a-5p	ENSG00000229807	XIST	lincRNA	chrX	73044913	73044934	-	8	0	AGO2	7mer-m8	ggauuacuaagUAGUAAGAGUu	| :|||||||	aaagggggaaaAGUAUUCUCAu	4
MIMAT0000441	hsa-miR-181b-5p	ENSG00000229807	XIST	lincRNA	chrX	73044930	73044953	-	8	0	AGO2	7mer-m8	aguauguCGAUCU-AUUGGUUUCu	|||||| |||||||	gcuggguGCUAGAGCUACCAAAGg	2
MIMAT0005903	hsa-miR-181d-5p	ENSG00000229807	XIST	lincRNA	chrX	73044939	73044959	-	6	0	AGO2	7mer-m8	ucgcggaaACCGUCGAUCUCa	||| |||||||	uaccaugcUGGGUGCUAGAGc	1
MIMAT0000763	hsa-miR-370-5p	ENSG00000229807	XIST	lincRNA	chrX	73044948	73044967	-	6	0	AGO2	7mer-m8	guUGUUUUAGUGACUACGACCu	:| |:|| || |||||||	guGCCAGAU-AC-CAUGCUGGg	2
MIMAT0011156	hsa-miR-144-5p	ENSG00000229807	XIST	lincRNA	chrX	73044991	73045012	-	9	0	AGO2	8mer	cuggcgaaguuccUUCCCUGAu	||||||||	auacugaaaacauAAGGGACUa	3
MIMAT0000318	hsa-miR-325	ENSG00000229807	XIST	lincRNA	chrX	73045062	73045083	-	8	1	AGO2	7mer-m8	aguagUAAUGGUCCGUCAUAAu	:| | | ||||||||	uuugaGUAAAAAUGCAGUAUUc	1
MIMAT0001536	hsa-miR-374c-5p	ENSG00000229807	XIST	lincRNA	chrX	73045062	73045083	-	8	2	AGO2	7mer-m8	ugccaaAAUGGUCUGUCAUAAu	| | | :|||||||	uuugagUAAAAAUGCAGUAUUc	2
MIMAT0000617	hsa-miR-655-3p	ENSG00000229807	XIST	lincRNA	chrX	73045062	73045084	-	8	2	AGO2	7mer-m8	agguaguaaugggcCGUCAUAAu	||||||||	uuuugaguaaaaauGCAGUAUUc	2
MIMAT0000274	hsa-miR-214-3p	ENSG00000229807	XIST	lincRNA	chrX	73045065	73045087	-	8	0	AGO2	8mer	agguuagucaaggacUACGUCAu	|||||||	uaauuuugaguaaaaAUGCAGUa	0
MIMAT0027515	hsa-miR-761	ENSG00000229807	XIST	lincRNA	chrX	73045065	73045087	-	8	0	AGO2	8mer	gacccGGUUCGUCCUUACGUCAc	:::||:| ||||||||	uaauuUUGAGUAAAAAUGCAGUa	1
MIMAT0004916	hsa-miR-3619-5p	ENSG00000229807	XIST	lincRNA	chrX	73045076	73045094	-	8	0	AGO2	8mer	acuGACUGUCGAAAAACUCAu	|||::| ||||||||	gcuCUGGUA--AUUUUGAGUa	1
MIMAT0011778	hsa-miR-379-3p	ENSG00000229807	XIST	lincRNA	chrX	73045089	73045110	-	7	0	AGO2	7mer-m8	gguccguUGUGUGUGACGAGAg	:::: ::|||||||	ccaauuuGUGUUUGCUGCUCUg	1
MIMAT0000417	hsa-miR-411-3p	ENSG00000229807	XIST	lincRNA	chrX	73045091	73045111	-	7	0	AGO2	7mer-m8	acaUUUGGUACUACACGACGAu	|| :::|| | |||||||	gccAAUUUGUG-UUUGCUGCUc	4
MIMAT0000461	hsa-miR-194-5p	ENSG00000229807	XIST	lincRNA	chrX	73045091	73045111	-	7	0	AGO2	7mer-m8	cgGUUAUAAAGACACGACGAu	|||| | | | |||||||	gcCAAUUUGUGUUUGCUGCUc	1
MIMAT0001341	hsa-miR-155-5p	ENSG00000229807	XIST	lincRNA	chrX	73045091	73045111	-	7	0	AGO2	7mer-m8	aaGUUUUGUACUUAACGACGAc	||| ::|| ||||||||	gcCAAUUUGUG-UUUGCUGCUc	3
MIMAT0002820	hsa-miR-323b-3p	ENSG00000229807	XIST	lincRNA	chrX	73045091	73045111	-	7	0	AGO2	7mer-m8	uguUUGGUGUCACACGACGAc	||:: || |||||||	gccAAUUUGUGUUUGCUGCUc	2
MIMAT0000069	hsa-miR-561-5p	ENSG00000229807	XIST	lincRNA	chrX	73045091	73045112	-	7	0	AGO2	7mer-m8	gcGGUUAUAAAUGCACGACGAu	||||| | |:: |||||||	ggCCAAUUUGUGUUUGCUGCUc	2
MIMAT0027578	hsa-miR-665	ENSG00000229807	XIST	lincRNA	chrX	73045091	73045112	-	7	0	AGO2	7mer-m8	uccucaGAACGGUGACGACGAa	:|||: :|||||||	ggccaaUUUGUGUUUGCUGCUc	0
MIMAT0000068	hsa-miR-455-3p	ENSG00000229807	XIST	lincRNA	chrX	73045091	73045116	-	7	0	AGO2	7mer-m8	gugUUUGGU--AAUAC--ACGACGAu	|::||| ||:|| |||||||	uugAGGCCAAUUUGUGUUUGCUGCUc	5
MIMAT0003165	hsa-miR-4701-5p	ENSG00000229807	XIST	lincRNA	chrX	73045093	73045114	-	7	0	AGO2	7mer-m8	cguguGUUAUUUACAAACGACu	|||| :|||||||||	gaggcCAAUUUGUGUUUGCUGc	0
MIMAT0003267	hsa-miR-588	ENSG00000229807	XIST	lincRNA	chrX	73045152	73045171	-	7	1	AGO2	7mer-m8	caaacuAUUUGACUGUGUUg	|| :| |||||||	uaguacUAUGCAGACACAAg	0
MIMAT0000439	hsa-miR-1252-5p	ENSG00000229807	XIST	lincRNA	chrX	73045159	73045179	-	7	1	AGO2	7mer-m8	cuagugAAAACACUGAUACGUu	| | || ||||||||	aaaggaUAUAGU-ACUAUGCAg	1
MIMAT0005930	hsa-miR-23a-3p	ENSG00000229807	XIST	lincRNA	chrX	73045181	73045200	-	7	0	AGO2	7mer-m8	acagaggUGUCCCGAGAAAu	| || |||||||	gcauaaaAAAGUGCUCUUUc	3
MIMAT0000084	hsa-miR-23b-3p	ENSG00000229807	XIST	lincRNA	chrX	73045230	73045253	-	5	0	AGO2	7mer-m8	cgcCUUGAAU---CGGUGACACUu	| ||||: |:|||||||	aaaGCACUUGUAUUCUACUGUGAu	8
MIMAT0000419	hsa-miR-130a-5p	ENSG00000229807	XIST	lincRNA	chrX	73045230	73045253	-	5	0	AGO2	7mer-m8	cgUCUUGAAU---CGGUGACACUu	|| ||||: |:|||||||	aaAGCACUUGUAUUCUACUGUGAu	1
MIMAT0000736	hsa-miR-23c	ENSG00000229807	XIST	lincRNA	chrX	73045240	73045261	-	5	0	AGO2	7mer-m8	ugucucucgaaCGGGAACAUAu	|| |||||||	uaaacuguaaaGCACUUGUAUu	1
MIMAT0004903	hsa-miR-519c-5p	ENSG00000229807	XIST	lincRNA	chrX	73045240	73045261	-	5	0	AGO2	7mer-m8	ucucucucagaCGGGAACAUAu	|| |||||||	uaaacuguaaaGCACUUGUAUu	0
MIMAT0005931	hsa-miR-518f-5p	ENSG00000229807	XIST	lincRNA	chrX	73045244	73045260	-	5	0	AGO2	7mer-m8	uucguaccUUCGUGAAu	||||||||	aaacuguaAAGCACUUg	0
MIMAT0000715	hsa-miR-526a	ENSG00000229807	XIST	lincRNA	chrX	73045244	73045265	-	5	0	AGO2	7mer-m8	gaugAUUUUGUACCUUCGUGAAu	|||| ::| ||||||||	uuugUAAACUGU-AAAGCACUUg	0
MIMAT0000724	hsa-miR-523-5p	ENSG00000229807	XIST	lincRNA	chrX	73045244	73045265	-	5	0	AGO2	7mer-m8	ugcgAGUUUACAGCGUCGUGAAa	| || ||| |||||||	uuugUAAACUGU-AAAGCACUUg	1
MIMAT0002825	hsa-miR-518e-5p	ENSG00000229807	XIST	lincRNA	chrX	73045244	73045265	-	5	0	AGO2	7mer-m8	gggaGUUUUUC-CUUCGUGAAa	:||| | ||||||||	uuugUAAACUGUAAAGCACUUg	1
MIMAT0000684	hsa-miR-522-5p	ENSG00000229807	XIST	lincRNA	chrX	73045244	73045266	-	5	0	AGO2	7mer-m8	agugguUUUGUAC-CUUCGUGAAu	|||| || ||||||||	cuuuguAAAC-UGUAAAGCACUUg	2
MIMAT0000718	hsa-miR-519a-5p	ENSG00000229807	XIST	lincRNA	chrX	73045244	73045266	-	5	0	AGO2	7mer-m8	ugugaGUUUGUAC-CUUCGUGAAu	:|||| || ||||||||	cuuugUAAAC-UGUAAAGCACUUg	0
MIMAT0002843	hsa-miR-519b-5p	ENSG00000229807	XIST	lincRNA	chrX	73045244	73045266	-	5	0	AGO2	7mer-m8	ggGAGAUUUUCC--UUCGUGAAa	:| |||| | ||||||||	cuUUGUAAACUGUAAAGCACUUg	3
MIMAT0000717	hsa-miR-520c-5p	ENSG00000229807	XIST	lincRNA	chrX	73045244	73045267	-	5	0	AGO2	7mer-m8	gguGAC-UUUGUAC-CUUCGUGAAu	:|| |||| || ||||||||	gcuUUGUAAAC-UGUAAAGCACUUg	4
MIMAT0000726	hsa-miR-518d-5p	ENSG00000229807	XIST	lincRNA	chrX	73045244	73045267	-	5	0	AGO2	7mer-m8	ugugggGUUUUA-GCUUCGUGAAg	:||| | : ||||||||	gcuuugUAAACUGUAAAGCACUUg	2
MIMAT0002834	hsa-miR-654-3p	ENSG00000229807	XIST	lincRNA	chrX	73045244	73045267	-	5	0	AGO2	7mer-m8	ugucAGGUUU--CCCUUCGUGAAa	| :||| | ||||||||	gcuuUGUAAACUGUAAAGCACUUg	1
MIMAT0002846	hsa-miR-514b-5p	ENSG00000229807	XIST	lincRNA	chrX	73045244	73045267	-	5	0	AGO2	7mer-m8	ugGGAGAUUUUCC--UUCGUGAAa	::| |||| | ||||||||	gcUUUGUAAACUGUAAAGCACUUg	3
MIMAT0002856	hsa-miR-513c-5p	ENSG00000229807	XIST	lincRNA	chrX	73045244	73045267	-	5	0	AGO2	7mer-m8	ugggugGUUU--CUCUUCGUGAAa	:||| | ||||||||	gcuuugUAAACUGUAAAGCACUUg	1
MIMAT0002830	hsa-miR-320d	ENSG00000229807	XIST	lincRNA	chrX	73045245	73045268	-	5	0	AGO2	7mer-m8	uuGGGAGAUUUUCC--UUCGUGAa	|::| |||| | |||||||	ugCUUUGUAAACUGUAAAGCACUu	2
MIMAT0003247	hsa-miR-320c	ENSG00000229807	XIST	lincRNA	chrX	73045252	73045275	-	7	0	AGO2	8mer	ucaUUG-ACCAACUUGUUGACAUu	||: || || : |||||||	gugAAUGUGCUUUGUAAACUGUAa	4
MIMAT0002855	hsa-miR-4429	ENSG00000229807	XIST	lincRNA	chrX	73045259	73045278	-	7	0	AGO2	8mer	cuUUCCCGAAGGGAAACAUc	|: | | : |||||||	auAGUGAAUGUGCUUUGUAa	1
MIMAT0002849	hsa-miR-9-3p	ENSG00000229807	XIST	lincRNA	chrX	73045259	73045281	-	7	0	AGO2	8mer	cucUUUCAC-GAAGGGAAACAUc	| |||| | : |||||||	aaaAUAGUGAAUGUGCUUUGUAa	1
MIMAT0000751	hsa-miR-320a	ENSG00000229807	XIST	lincRNA	chrX	73045261	73045283	-	7	0	AGO2	7mer-m8	agagacguccggcACACGAAACg	|||||||||	aaaaaauagugaaUGUGCUUUGu	1
MIMAT0027571	hsa-miR-320b	ENSG00000229807	XIST	lincRNA	chrX	73045262	73045285	-	7	0	AGO2	7mer-m8	gacccUCUGUC-UUUUCACGAAAa	| |:|| :|| |||||||	aaaaaAAAUAGUGAAUGUGCUUUg	0
MIMAT0016894	hsa-miR-149-5p	ENSG00000229807	XIST	lincRNA	chrX	73045267	73045281	-	7	0	AGO2	7mer-m8	guccAUCAGACUUACAg	||| |||||||	aaaaUAG--UGAAUGUg	0
MIMAT0000258	hsa-miR-193a-3p	ENSG00000229807	XIST	lincRNA	chrX	73045267	73045286	-	7	0	AGO2	7mer-m8	ugaguggcUGUCCAACUUACAa	|:|| |||||||	gaaaaaaaAUAG--UGAAUGUg	1
MIMAT0000256	hsa-miR-193b-3p	ENSG00000229807	XIST	lincRNA	chrX	73045267	73045289	-	7	0	AGO2	7mer-m8	ugaguggcugucgcaACUUACAa	|||||||	ccugaaaaaaaauagUGAAUGUg	3
MIMAT0000257	hsa-miR-7153-5p	ENSG00000229807	XIST	lincRNA	chrX	73045267	73045289	-	7	0	AGO2	7mer-m8	uggguggcUGUCGUUACUUACAa	| | :|:|||||||	ccugaaaaAAAAUAGUGAAUGUg	3
MIMAT0002821	hsa-miR-146b-5p	ENSG00000229807	XIST	lincRNA	chrX	73045267	73045289	-	7	0	AGO2	7mer-m8	uggguggcUGUUGUUACUUACAa	| ||:|:|||||||	ccugaaaaAAAAUAGUGAAUGUg	0
MIMAT0026483	hsa-miR-146a-5p	ENSG00000229807	XIST	lincRNA	chrX	73045286	73045308	-	6	0	AGO2	7mer-m8	cauUGAC-GUCUCUGCACUGGAc	|:|| :| | |||||||	auuAUUGAUAUCUAGGUGACCUg	2
MIMAT0004600	hsa-miR-629-5p	ENSG00000229807	XIST	lincRNA	chrX	73045296	73045317	-	6	3	AGO2	7mer-m8	gaAUGUCAUAUACU-ACUAUAGg	|:|| |: || | |||||||	aaUGCAAUG-AUUAUUGAUAUCu	4
MIMAT0000771	hsa-miR-876-5p	ENSG00000229807	XIST	lincRNA	chrX	73045355	73045376	-	6	0	AGO2	7mer-m8	ugUGAAUGACCUGUGGAUGAUCc	| || ||| |:| |||||||	aaAAUUUCUGAAUA-CUACUAGu	0
MIMAT0025857	hsa-miR-3167	ENSG00000229807	XIST	lincRNA	chrX	73045363	73045383	-	6	0	AGO2	8mer	acugacCGUGGAAAGACUUAu	| | |||||||||	uucagaGAAAAUUUCUGAAUa	0
MIMAT0000721	hsa-miR-6783-3p	ENSG00000229807	XIST	lincRNA	chrX	73045389	73045409	-	6	0	AGO2	7mer-m8	uuucuaguuggUACAUAAUAa	|||||||||	accacccccugAUGUAUUAUu	1
MIMAT0018443	hsa-miR-1343-3p	ENSG00000229807	XIST	lincRNA	chrX	73045390	73045411	-	6	0	AGO2	7mer-m8	ucgugaaucgucCAACAUAAUa	| |||||||	uuaccacccccuGAUGUAUUAu	0
MIMAT0003331	hsa-miR-7151-5p	ENSG00000229807	XIST	lincRNA	chrX	73045390	73045418	-	6	0	AGO2	7mer-m8	uuUCUCCAAU--UGG-----UACAUAAUa	| || ||| ||| ||||||||	ucAUAGCUUACCACCCCCUGAUGUAUUAu	3
MIMAT0000271	hsa-miR-542-3p	ENSG00000229807	XIST	lincRNA	chrX	73045419	73045439	-	6	0	AGO2	7mer-m8	ugacggacAGACACGGACGACa	|:|| ||||||||	caauuggaUUUG-GCCUGCUGu	2
MIMAT0010364	hsa-miR-362-5p	ENSG00000229807	XIST	lincRNA	chrX	73045419	73045440	-	6	0	AGO2	7mer-m8	acacAGUCAAAGUGGGACGACg	|::| ||:: |||||||	ccaaUUGGAUUUGGCCUGCUGu	0
MIMAT0017999	hsa-miR-500b-5p	ENSG00000229807	XIST	lincRNA	chrX	73045419	73045442	-	6	0	AGO2	7mer-m8	cgacgUGGUCGGA--CGGACGACu	|:::| :| ||||||||	agccaAUUGGAUUUGGCCUGCUGu	0
MIMAT0004690	hsa-miR-378g	ENSG00000229807	XIST	lincRNA	chrX	73045494	73045514	-	8	0	AGO2	8mer	ucaAUCACCUGGUACAAUGUAu	|| ||| :: ||||||||	ccaUA-UGGUUUCUGUUACAUa	1
MIMAT0004813	hsa-miR-1245b-5p	ENSG00000229807	XIST	lincRNA	chrX	73045494	73045514	-	8	0	AGO2	8mer	ccaAUCACCUGGCACAAUGUAu	|| ||| :: ||||||||	ccaUA-UGGUUUCUGUUACAUa	2
MIMAT0000460	hsa-miR-3142	ENSG00000229807	XIST	lincRNA	chrX	73045496	73045515	-	8	0	AGO2	8mer	agGUGUACCUCAACGACAAUGu	||:||| ||| |||||||	gcCAUAUG--GUUUCUGUUACa	2
MIMAT0000646	hsa-miR-499a-5p	ENSG00000229807	XIST	lincRNA	chrX	73045577	73045597	-	5	0	AGO2	7mer-m8	uggggaUAGUGCUAAUCGUAAUu	||:::|| |||||||	guguaaAUUGUGA--AGCAUUAu	7
MIMAT0027515	hsa-miR-510-5p	ENSG00000229807	XIST	lincRNA	chrX	73045614	73045636	-	3	0	AGO2	7mer-m8	gacccgguUCGUCCUUACGUCAc	:||| |||||||	aguguauuGGCAAUCAUGCAGUu	1
MIMAT0015050	hsa-miR-506-5p	ENSG00000229807	XIST	lincRNA	chrX	73045626	73045647	-	3	0	AGO2	7mer-m8	uucuccagcuggCACAUAACCc	|||||||||	aaaaaccaauuaGUGUAUUGGc	2
MIMAT0002830	hsa-miR-371a-5p	ENSG00000229807	XIST	lincRNA	chrX	73045661	73045682	-	6	0	AGO2	7mer-m8	uugggAGAUUUUCCUUCGUGAa	| |: | | |||||||	gauaaUGUGUAUGAAAGCACUg	2
MIMAT0002176	hsa-miR-1296-5p	ENSG00000229807	XIST	lincRNA	chrX	73045668	73045689	-	6	0	AGO2	8mer	ucucuccucucgGCACAUACUg	:||||||||	aaugacugauaaUGUGUAUGAa	1
MIMAT0022705	hsa-miR-5691	ENSG00000229807	XIST	lincRNA	chrX	73045668	73045689	-	6	0	AGO2	8mer	uuucuuuaacaggaACAUACUa	|||||||	aaugacugauaaugUGUAUGAa	2
MIMAT0004688	hsa-miR-6805-3p	ENSG00000229807	XIST	lincRNA	chrX	73045677	73045696	-	6	0	AGO2	7mer-m8	uuaAUGUUAUGUUAGACUAUUc	| :|| |::| |||||||	ugaUUUAA-AUGA-CUGAUAAu	2
MIMAT0022706	hsa-miR-671-5p	ENSG00000229807	XIST	lincRNA	chrX	73045724	73045748	-	8	0	AGO1,AGO2	7mer-m8	ccguUUCAAAUUCU---AGGAACUa	| |||||| | |||||||	gagcAUGUUUAAUACUUUCCUUGAu	4
MIMAT0003339	hsa-miR-425-5p	ENSG00000229807	XIST	lincRNA	chrX	73045746	73045768	-	7	0	AGO2	7mer-m8	cgcggguuaauuaCAGACAACUa	| |||||||	ugagagaaccuggGACUGUUGAg	4
MIMAT0000269	hsa-miR-4306	ENSG00000229807	XIST	lincRNA	chrX	73045748	73045767	-	7	0	AGO2	7mer-m8	ccggcacuGACCUCUGACAAu	|||| |||||||	gagagaacCUGG-GACUGUUg	4
MIMAT0000426	hsa-miR-185-5p	ENSG00000229807	XIST	lincRNA	chrX	73045748	73045768	-	7	0	AGO2	7mer-m8	gcugguaccGACAUCUGACAAu	||| :|||||||	ugagagaacCUG-GGACUGUUg	1
MIMAT0004952	hsa-miR-4644	ENSG00000229807	XIST	lincRNA	chrX	73045796	73045817	-	9	0	AGO2	7mer-m8	ucCCCGGAGUCG--GAGGACCa	| ||| || |||||||	cuGUGCCAACGCUACUCCUGGg	1
MIMAT0005796	hsa-miR-485-5p	ENSG00000229807	XIST	lincRNA	chrX	73045808	73045832	-	7	0	AGO2	7mer-m8	acucacGAACGAUC---CACGGUUc	:||| |:| |||||||	aaauaaUUUGGUGGACUGUGCCAAc	2
MIMAT0000095	hsa-miR-6884-5p	ENSG00000229807	XIST	lincRNA	chrX	73045808	73045835	-	7	0	AGO2	7mer-m8	ucGUUU-UUACACGAU----CACGGUUu	|||| ||| || |: |||||||	gcCAAAUAAUUUGGUGGACUGUGCCAAc	2
MIMAT0004784	hsa-miR-3622a-5p	ENSG00000229807	XIST	lincRNA	chrX	73045814	73045834	-	7	0	AGO2	7mer-m8	cacaUAUACGGGUACCUGACg	||| :: :|||||||	ccaaAUAAUUUGGUGGACUGu	4
MIMAT0004987	hsa-miR-4784	ENSG00000229807	XIST	lincRNA	chrX	73045824	73045847	-	7	0	AGO2	7mer-m8	gaGUA-GGCUACAUG-UUAUUAAa	||| : :|| | |||||||	cuCAUAGUAGUGGCCAAAUAAUUu	1
MIMAT0019798	hsa-miR-3150b-3p	ENSG00000229807	XIST	lincRNA	chrX	73045831	73045852	-	7	0	AGO2	8mer	uuccccauccaCACCACCGGUu	|| |||||||	cccugcucauaGUAGUGGCCAa	0
MIMAT0003255	hsa-miR-3179	ENSG00000229807	XIST	lincRNA	chrX	73045831	73045853	-	7	0	AGO2	8mer	caaGAUUGGGUA--A-CACCGGUu	|| :|:||| | |||||||	uccCU-GCUCAUAGUAGUGGCCAa	0
MIMAT0005944	hsa-miR-379-5p	ENSG00000229807	XIST	lincRNA	chrX	73045960	73045981	-	10	0	AGO1,AGO2,AGO3	7mer-m8	auuuacuuaaGUUAAAGGAAGa	||: |||||||	cugccagcaaCAGCUUCCUUCu	0
MIMAT0000078	hsa-miR-3529-5p	ENSG00000229807	XIST	lincRNA	chrX	73046051	73046071	-	12	0	AGO1,AGO2	8mer	ccuuuagggaccgUUACACUa	|||||||	cucucuagagaaaAAUGUGAa	2
MIMAT0000418	hsa-miR-190b	ENSG00000229807	XIST	lincRNA	chrX	73046051	73046071	-	12	0	AGO1,AGO2	8mer	ccauuagggaccgUUACACUa	|||||||	cucucuagagaaaAAUGUGAa	2
MIMAT0004593	hsa-miR-190a-5p	ENSG00000229807	XIST	lincRNA	chrX	73046051	73046071	-	12	0	AGO1,AGO2	8mer	cgucuGUCAUCGUGUUACACUu	:|| || | |||||||	cucucUAG-AGAAAAAUGUGAa	1
MIMAT0018000	hsa-miR-124-3p	ENSG00000229807	XIST	lincRNA	chrX	73046051	73046072	-	12	1	AGO1,AGO2	8mer	cccauuagugaccgUUACACUa	|||||||	gcucucuagagaaaAAUGUGAa	1
MIMAT0002831	hsa-miR-506-3p	ENSG00000229807	XIST	lincRNA	chrX	73046062	73046085	-	12	1	AGO1,AGO2	7mer-m8	gucUUUCGCG--AAGGGAGAUCUc	||||:|| |:|||||||	aaaAAAGUGCCAGGCUCUCUAGAg	0
MIMAT0002841	hsa-miR-192-5p	ENSG00000229807	XIST	lincRNA	chrX	73046062	73046085	-	12	1	AGO1,AGO2	7mer-m8	cucUUUCACG--AAGGGAGAUCUc	||||||| |:|||||||	aaaAAAGUGCCAGGCUCUCUAGAg	2
MIMAT0002845	hsa-miR-215-5p	ENSG00000229807	XIST	lincRNA	chrX	73046062	73046085	-	12	1	AGO1,AGO2	7mer-m8	gucUUUCACG--AAGGGAGAUCUc	||||||| |:|||||||	aaaAAAGUGCCAGGCUCUCUAGAg	0
MIMAT0005449	hsa-miR-296-3p	ENSG00000229807	XIST	lincRNA	chrX	73046062	73046085	-	12	1	AGO1,AGO2	7mer-m8	gucUUUCGCG--AAGGGAGAUCUc	||||:|| |:|||||||	aaaAAAGUGCCAGGCUCUCUAGAg	0
MIMAT0005450	hsa-miR-331-3p	ENSG00000229807	XIST	lincRNA	chrX	73046062	73046085	-	12	1	AGO1,AGO2	7mer-m8	gucUUUCGCG--AAGGGAGAUCUc	||||:|| |:|||||||	aaaAAAGUGCCAGGCUCUCUAGAg	1
MIMAT0005451	hsa-miR-141-3p	ENSG00000229807	XIST	lincRNA	chrX	73046062	73046085	-	12	1	AGO1,AGO2	7mer-m8	gucUUUCGCG--AAGGGAGAUCUc	||||:|| |:|||||||	aaaAAAGUGCCAGGCUCUCUAGAg	0
MIMAT0005452	hsa-miR-200a-3p	ENSG00000229807	XIST	lincRNA	chrX	73046062	73046085	-	12	1	AGO1,AGO2	7mer-m8	gucUUUCGCG--AAGGGAGAUCUc	||||:|| |:|||||||	aaaAAAGUGCCAGGCUCUCUAGAg	3
MIMAT0005454	hsa-miR-2114-3p	ENSG00000229807	XIST	lincRNA	chrX	73046062	73046085	-	12	1	AGO1,AGO2	7mer-m8	gucUUUCGCG--AAGGGAGAUCUc	||||:|| |:|||||||	aaaAAAGUGCCAGGCUCUCUAGAg	1
MIMAT0005455	hsa-miR-6823-3p	ENSG00000229807	XIST	lincRNA	chrX	73046062	73046085	-	12	1	AGO1,AGO2	7mer-m8	gucUUUCACG--AAGGGAGAUCUc	||||||| |:|||||||	aaaAAAGUGCCAGGCUCUCUAGAg	1
MIMAT0005456	hsa-miR-151b	ENSG00000229807	XIST	lincRNA	chrX	73046062	73046085	-	12	1	AGO1,AGO2	7mer-m8	gucUUUCACG--AAGGGAGAUCUc	||||||| |:|||||||	aaaAAAGUGCCAGGCUCUCUAGAg	0
MIMAT0000436	hsa-miR-151a-5p	ENSG00000229807	XIST	lincRNA	chrX	73046154	73046173	-	13	0	AGO1,AGO2,AGO3	8mer	ucaUGUAGUAGAUAUGACAu	|:|| : : |||||||	uucAUAUAGGUGAUACUGUa	4
MIMAT0004814	hsa-miR-28-5p	ENSG00000229807	XIST	lincRNA	chrX	73046172	73046179	-	13	0	AGO1,AGO2,AGO3	7mer-m8	uuccacuaccagucGUCUGUAu	|||||||	#NAME?	2
MIMAT0004814	hsa-miR-3139	ENSG00000229807	XIST	lincRNA	chrX	73046172	73046193	-	13	0	AGO1,AGO2,AGO3	7mer-m8	uuccacuaccagUCGUCUGUAu	|||||||||	acuucccucaggAGCAGACAUu	2
MIMAT0015087	hsa-miR-708-5p	ENSG00000229807	XIST	lincRNA	chrX	73046235	73046257	-	12	0	AGO1,AGO2,AGO3	7mer-m8	uacuaacGGAG-GGAGAACUCUu	|:|| || |||||||	uucacauCUUCUCCACUUGAGAg	0
MIMAT0005789	hsa-miR-670-5p	ENSG00000229807	XIST	lincRNA	chrX	73046235	73046258	-	12	0	AGO1,AGO2,AGO3	7mer-m8	uauuUGCUGUGGAG--GAACUCUu	|| | :||| |||||||	auucACAUCUUCUCCACUUGAGAg	0
MIMAT0004808	hsa-miR-10a-5p	ENSG00000229807	XIST	lincRNA	chrX	73046279	73046290	-	4	0	AGO2	7mer-m8	acucccccuuucaaGAUAUCAg	|||||||	#NAME?	3
MIMAT0004808	hsa-miR-10b-5p	ENSG00000229807	XIST	lincRNA	chrX	73046279	73046300	-	7	0	AGO1,AGO2,AGO3	7mer-m8	acucccccuuucaaGAUAUCAg	|||||||	accuauuuguuaggCUAUAGUg	3
MIMAT0006764	hsa-miR-486-5p	ENSG00000229807	XIST	lincRNA	chrX	73046301	73046320	-	11	0	AGO1,AGO2,AGO3	7mer-m8	agGAGAGUUGG-GUCGAAAa	||:| ||:| |||||||	agCUUUAAAUCACAGCUUUu	2
MIMAT0005793	hsa-miR-653-5p	ENSG00000229807	XIST	lincRNA	chrX	73046301	73046321	-	11	0	AGO1,AGO2,AGO3	7mer-m8	uggGAGAGUUGG-GUCGAAAa	||:| ||:| |||||||	cagCUUUAAAUCACAGCUUUu	0
MIMAT0018944	hsa-miR-126-5p	ENSG00000229807	XIST	lincRNA	chrX	73046301	73046321	-	11	0	AGO1,AGO2,AGO3	7mer-m8	gcgGAGAGUCGG-GUCGAAAa	||:| | :| |||||||	cagCUUUAAAUCACAGCUUUu	0
MIMAT0000442	hsa-miR-448	ENSG00000229807	XIST	lincRNA	chrX	73046313	73046334	-	11	0	AGO1,AGO2,AGO3	8mer	ugaaagccAAUAGAUCGAAAUa	| | | |||||||	gccagucuUGAGCCAGCUUUAa	2
MIMAT0006764	hsa-miR-642b-5p	ENSG00000229807	XIST	lincRNA	chrX	73046314	73046332	-	11	0	AGO1,AGO2,AGO3	8mer	aggAGAGUUGGGUCGAAAa	|||::| ||||||||	cagUCUUGAGCCAGCUUUa	2
MIMAT0005793	hsa-miR-6509-5p	ENSG00000229807	XIST	lincRNA	chrX	73046314	73046333	-	11	0	AGO1,AGO2,AGO3	8mer	ugggAGAGUUGGGUCGAAAa	|||::| ||||||||	ccagUCUUGAGCCAGCUUUa	0
MIMAT0018944	hsa-miR-196a-5p	ENSG00000229807	XIST	lincRNA	chrX	73046314	73046333	-	11	0	AGO1,AGO2,AGO3	8mer	gcggAGAGUCGGGUCGAAAa	|||:: ||||||||	ccagUCUUGAGCCAGCUUUa	0
MIMAT0000510	hsa-miR-196b-5p	ENSG00000229807	XIST	lincRNA	chrX	73046314	73046336	-	11	0	AGO1,AGO2,AGO3	8mer	agCGG-GAGAGUUGGGUCGAAAa	||| |||::| ||||||||	ggGCCAGUCUUGAGCCAGCUUUa	2
MIMAT0005792	hsa-miR-1180-5p	ENSG00000229807	XIST	lincRNA	chrX	73046314	73046336	-	11	0	AGO1,AGO2,AGO3	8mer	aaCGG-GAGAGUUGGGUCGAAAa	||| |||::| ||||||||	ggGCCAGUCUUGAGCCAGCUUUa	1
MIMAT0000450	hsa-miR-7114-3p	ENSG00000229807	XIST	lincRNA	chrX	73046318	73046339	-	11	0	AGO1,AGO2,AGO3	7mer-m8	cccucacuUCUGUGCCUCGGUCu	|| | : |||||||	ccugggccAGUC-UUGAGCCAGc	2
MIMAT0000459	hsa-miR-3145-3p	ENSG00000229807	XIST	lincRNA	chrX	73046328	73046351	-	7	0	AGO2	7mer-m8	ugacCCUGAAAC--AUCCGGUCAa	| |:| || |:|||||||	gacaGUAUUAUGCCUGGGCCAGUc	2
MIMAT0002819	hsa-miR-154-5p	ENSG00000229807	XIST	lincRNA	chrX	73046328	73046351	-	7	0	AGO2	7mer-m8	ucGCCCUGAAAC--UCCCGGUCAa	| | |:| || ||||||||	gaCAGUAUUAUGCCUGGGCCAGUc	3
MIMAT0000721	hsa-miR-3064-5p	ENSG00000229807	XIST	lincRNA	chrX	73046340	73046358	-	8	0	AGO1,AGO2	7mer-m8	uuUCUAGUUGGUACAUAAUAa	||||::| || |||||||	uuAGAUUGA-CA-GUAUUAUg	1
MIMAT0001536	hsa-miR-6504-5p	ENSG00000229807	XIST	lincRNA	chrX	73046342	73046363	-	8	0	AGO1,AGO2	8mer	ugccAAAAUGGUCUGUCAUAAu	||| : : |||||||||	uaccUUUAGAUUGACAGUAUUa	2
MIMAT0000318	hsa-miR-6763-5p	ENSG00000229807	XIST	lincRNA	chrX	73046342	73046364	-	8	0	AGO1,AGO2	8mer	agUAGUAAU-GGUCCGUCAUAAu	| | ||| : | |||||||	uuACCUUUAGAUUGACAGUAUUa	1
MIMAT0000617	hsa-miR-3150a-3p	ENSG00000229807	XIST	lincRNA	chrX	73046342	73046365	-	8	0	AGO1,AGO2	8mer	agGUAGUAAU-GGGCCGUCAUAAu	:| | ||| ::| |||||||	guUACCUUUAGAUUGACAGUAUUa	2
MIMAT0000456	hsa-miR-5586-5p	ENSG00000229807	XIST	lincRNA	chrX	73046390	73046411	-	10	0	AGO1,AGO2	7mer-m8	ucGGGUUUUCCUCUUAAGAAAc	:|: ||| :|||||||	uaUCUUUAAGCCUGAUUCUUUu	3
MIMAT0003242	hsa-miR-802	ENSG00000229807	XIST	lincRNA	chrX	73046406	73046425	-	10	0	AGO1,AGO2	7mer-m8	gucCAUGGUUAUAAAAUAGAu	|| |: |: |||||||	ccaGUUCUCCUG-UUUAUCUu	2
MIMAT0028216	hsa-miR-552-3p	ENSG00000229807	XIST	lincRNA	chrX	73046416	73046437	-	18	0	AGO1,AGO2,AGO3	7mer-m8	ggauggUGUAAACAGUCAAGAGu	|:|||| ||||||||	ucuuagAUAUUU-CCAGUUCUCc	0
MIMAT0002809	hsa-miR-654-5p	ENSG00000229807	XIST	lincRNA	chrX	73046416	73046438	-	18	0	AGO1,AGO2,AGO3	7mer-m8	ucGGAUACCUUAA-GUCAAGAGu	|:|| | || ||||||||	cuCUUAGAUAUUUCCAGUUCUCc	4
MIMAT0000449	hsa-miR-541-3p	ENSG00000229807	XIST	lincRNA	chrX	73046416	73046440	-	18	0	AGO1,AGO2,AGO3	7mer-m8	uuGGGUACCU-UAA--GUCAAGAGu	|:| | || ||| ||||||||	uaCUCUUAGAUAUUUCCAGUUCUCc	4
MIMAT0000087	hsa-miR-31-5p	ENSG00000229807	XIST	lincRNA	chrX	73046446	73046465	-	21	0	AGO1,AGO2,AGO3	8mer	gaAGGUCAGCUCCUACAAAUGu	||: || | |||||||	ccUCUUUUCUA--UUGUUUACa	0
MIMAT0000692	hsa-miR-505-3p	ENSG00000229807	XIST	lincRNA	chrX	73046446	73046465	-	21	0	AGO1,AGO2,AGO3	8mer	gaAGGUCAGUUCCUACAAAUGu	||: || | |||||||	ccUCUUUUCUA--UUGUUUACa	0
MIMAT0000245	hsa-miR-329-3p	ENSG00000229807	XIST	lincRNA	chrX	73046446	73046467	-	21	0	AGO1,AGO2,AGO3	8mer	gaaggucagccccuACAAAUGu	|||||||	uaccucuuuucuauUGUUUACa	0
MIMAT0000420	hsa-miR-362-3p	ENSG00000229807	XIST	lincRNA	chrX	73046446	73046467	-	21	0	AGO1,AGO2,AGO3	8mer	ucgacucacauccuACAAAUGu	|||||||	uaccucuuuucuauUGUUUACa	3
MIMAT0000244	hsa-miR-520h	ENSG00000229807	XIST	lincRNA	chrX	73046446	73046468	-	21	0	AGO1,AGO2,AGO3	8mer	cgacucucacauccuACAAAUGu	|||||||	cuaccucuuuucuauUGUUUACa	1
MIMAT0019036	hsa-miR-520g-3p	ENSG00000229807	XIST	lincRNA	chrX	73046461	73046476	-	19	0	AGO1,AGO2,AGO3	7mer-m8	uucUUUGAUGAUGGAGu	|||| |||||||	ccuAAAC-CCUACCUCu	0
MIMAT0000062	hsa-miR-1269a	ENSG00000229807	XIST	lincRNA	chrX	73046461	73046479	-	19	0	AGO1,AGO2,AGO3	7mer-m8	uugauAUGUUGGAUGAUGGAGu	|| |||| |||||||	aacccUA-AACC--CUACCUCu	1
MIMAT0000063	hsa-miR-1269b	ENSG00000229807	XIST	lincRNA	chrX	73046461	73046479	-	19	0	AGO1,AGO2,AGO3	7mer-m8	uuGGUGUGUUGGAUGAUGGAGu	|| :| |||| |||||||	aaCCCUA-AACC--CUACCUCu	1
MIMAT0000064	hsa-miR-1278	ENSG00000229807	XIST	lincRNA	chrX	73046461	73046479	-	19	0	AGO1,AGO2,AGO3	7mer-m8	uuGGUAUGUUGGAUGAUGGAGu	|| || |||| |||||||	aaCCCUA-AACC--CUACCUCu	4
MIMAT0000065	hsa-miR-1914-3p	ENSG00000229807	XIST	lincRNA	chrX	73046461	73046480	-	19	0	AGO1,AGO2,AGO3	7mer-m8	uugauacgUUGGAUGAUGGAGa	|||| |||||||	gaacccuaAACC--CUACCUCu	4
MIMAT0018980	hsa-miR-6738-5p	ENSG00000229807	XIST	lincRNA	chrX	73046461	73046480	-	19	0	AGO1,AGO2,AGO3	7mer-m8	aagaaGGUGU-GGAUGGAGa	|:| | ||||||||	gaaccCUAAACCCUACCUCu	0
MIMAT0000066	hsa-miR-5194	ENSG00000229807	XIST	lincRNA	chrX	73046461	73046481	-	19	0	AGO1,AGO2,AGO3	7mer-m8	uugauauGUUGGAGGAUGGAGu	:|| | ||||||||	agaacccUAAAC-CCUACCUCu	2
MIMAT0000067	hsa-miR-4295	ENSG00000229807	XIST	lincRNA	chrX	73046461	73046481	-	19	0	AGO1,AGO2,AGO3	7mer-m8	uugauauGUUAGAUGAUGGAGu	:|| | |||||||	agaacccUAAAC-CCUACCUCu	1
MIMAT0000414	hsa-miR-3666	ENSG00000229807	XIST	lincRNA	chrX	73046461	73046481	-	19	0	AGO1,AGO2,AGO3	7mer-m8	uugacauGUUUGAUGAUGGAGu	:|||| |||||||	agaacccUAAAC-CCUACCUCu	4
MIMAT0000415	hsa-miR-130a-3p	ENSG00000229807	XIST	lincRNA	chrX	73046461	73046481	-	19	0	AGO1,AGO2,AGO3	7mer-m8	uugUCGUGUUUGAUGAUGGAGu	| | :|||| |||||||	agaACCCUAAAC-CCUACCUCu	2
MIMAT0000096	hsa-miR-130b-3p	ENSG00000229807	XIST	lincRNA	chrX	73046461	73046482	-	19	0	AGO1,AGO2,AGO3	7mer-m8	uuguuauguugaauGAUGGAGu	|||||||	gagaacccuaaaccCUACCUCu	3
MIMAT0004810	hsa-miR-301a-3p	ENSG00000229807	XIST	lincRNA	chrX	73046467	73046487	-	19	0	AGO1,AGO2,AGO3	7mer-m8	ucaagagggUUGCAUUUGGGu	| | |||||||	aagaugagaACCCUAAACCCu	1
MIMAT0004924	hsa-miR-301b-3p	ENSG00000229807	XIST	lincRNA	chrX	73046488	73046509	-	6	0	AGO2	7mer-m8	accacuaaGUGUUUCUUUAGGu	| ::::|||||||	cuugaagaCCUGGGGAAAUCCc	2
MIMAT0015042	hsa-miR-454-3p	ENSG00000229807	XIST	lincRNA	chrX	73046488	73046509	-	6	0	AGO2	7mer-m8	uguggucauaaagaCUUUAGGa	|||||||	cuugaagaccugggGAAAUCCc	1
MIMAT0016895	hsa-miR-219a-2-3p	ENSG00000229807	XIST	lincRNA	chrX	73046493	73046513	-	6	0	AGO2	8mer	aacagguaacaUAGACCCCUa	| |||||||	gaagcuugaagACCUGGGGAa	5
MIMAT0002824	hsa-miR-323a-3p	ENSG00000229807	XIST	lincRNA	chrX	73046503	73046525	-	6	0	AGO2	7mer-m8	cuuuuugcgggggacCGAACUUu	|||||||	ccaggaaggauagaaGCUUGAAg	1
MIMAT0027467	hsa-miR-2467-3p	ENSG00000229807	XIST	lincRNA	chrX	73046519	73046539	-	7	0	AGO2	8mer	gaugucuccUCUUCGGGUCCUu	|||| |||||||	ccaugacccAGAA-CCCAGGAa	2
MIMAT0019776	hsa-miR-340-5p	ENSG00000229807	XIST	lincRNA	chrX	73046519	73046540	-	7	0	AGO2	8mer	cgcucucacGCCCGGGGUCCUc	| | |||||||	cccaugaccCAGAACCCAGGAa	5
MIMAT0002835	hsa-miR-452-5p	ENSG00000229807	XIST	lincRNA	chrX	73046561	73046582	-	7	0	AGO2	7mer-m8	uguCUUUCACGAAGGGAGUUCUc	|||| | | :|||||||	agcGAAAAAG-GUAUCUCAAGAc	1
MIMAT0027605	hsa-miR-4676-3p	ENSG00000229807	XIST	lincRNA	chrX	73046585	73046601	-	7	0	AGO2	7mer-m8	gaCUCCUUGUCUCCUGu	|| |:|:|||||||	uaGAUGGAUAGAGGACc	0
MIMAT0018183	hsa-miR-892c-3p	ENSG00000229807	XIST	lincRNA	chrX	73046585	73046606	-	7	0	AGO2	7mer-m8	ucugacguccgggAUCUCCUGu	||||||||	cuaccuagauggaUAGAGGACc	1
MIMAT0028212	hsa-miR-1321	ENSG00000229807	XIST	lincRNA	chrX	73046592	73046614	-	7	0	AGO2	8mer	cgGUUAUGUCCGUCUCUACCUAg	||| :| | ||||||||	caCAAAGCCUACCUAGAUGGAUa	0
MIMAT0003879	hsa-miR-4756-5p	ENSG00000229807	XIST	lincRNA	chrX	73046609	73046630	-	7	0	AGO2	8mer	ccaaucaCCUGGUCCAGUGUUu	|| || |||||||	gauggaaGGCCCCUGUCACAAa	2
MIMAT0003389	hsa-miR-4739	ENSG00000229807	XIST	lincRNA	chrX	73046611	73046632	-	7	0	AGO2	8mer	aaagucaauaguuaGACAGUGu	|||||||	aggauggaaggcccCUGUCACa	2
MIMAT0000705	hsa-miR-889-3p	ENSG00000229807	XIST	lincRNA	chrX	73046627	73046641	-	7	0	AGO2	7mer-m8	ugaguguggauccaaGGUUCCUAa	||||||||	#NAME?	7
MIMAT0016925	hsa-miR-5094	ENSG00000229807	XIST	lincRNA	chrX	73046627	73046641	-	7	0	AGO2	7mer-m8	uggguccaucGUUCCUAa	|||||||	#NAME?	3
MIMAT0016925	hsa-miR-335-5p	ENSG00000229807	XIST	lincRNA	chrX	73046627	73046644	-	7	0	AGO2	7mer-m8	uggguccaucGUUCCUAa	|||||||	accuacaaccCAAGGAUg	3
MIMAT0000705	hsa-miR-766-5p	ENSG00000229807	XIST	lincRNA	chrX	73046627	73046650	-	7	0	AGO2	7mer-m8	ugagUGUGGAUCCAAGGUUCCUAa	| ||||| ||||||||	uggaAGACCUACAACCCAAGGAUg	7
MIMAT0018937	hsa-miR-620	ENSG00000229807	XIST	lincRNA	chrX	73046659	73046678	-	7	0	AGO2	7mer-m8	gaagacugagguUCGGGUCa	|||||||	cgaccuaagauuAGCCCAGg	0
MIMAT0003267	hsa-miR-1270	ENSG00000229807	XIST	lincRNA	chrX	73046684	73046704	-	6	0	AGO2	7mer-m8	caaACUAUUUG-ACUGUGUUg	||| | : ||||||||	aacUGAGACUUGUGACACAAg	0
MIMAT0005788	hsa-miR-873-5p	ENSG00000229807	XIST	lincRNA	chrX	73046689	73046706	-	6	0	AGO2	7mer-m8	uaUUUACUGUGGAGGAACACUu	|| ||| | |||||||	agAACUGAGA----CUUGUGAc	0
MIMAT0019950	hsa-miR-543	ENSG00000229807	XIST	lincRNA	chrX	73046707	73046727	-	6	0	AGO2	8mer	aaauucacuagaUUUCCGGAu	:|||||||	acaggacacaugGAAGGCCUa	0
MIMAT0015011	hsa-miR-32-5p	ENSG00000229807	XIST	lincRNA	chrX	73046707	73046729	-	6	0	AGO2	8mer	agacUUCCAAGU-CUUUCCGGAa	|:| || |:|||||||	ggacAGGACACAUGGAAGGCCUa	0
MIMAT0002870	hsa-miR-363-3p	ENSG00000229807	XIST	lincRNA	chrX	73046736	73046756	-	6	0	AGO2	8mer	uuuguagUGACGUUCAGAAUu	::| ||||||||	ggcuugaGUUAGAAGUCUUAa	3
MIMAT0002882	hsa-miR-92a-3p	ENSG00000229807	XIST	lincRNA	chrX	73046772	73046795	-	6	0	AGO2	7mer-m8	cacUAAC--GGUGAGAGGACUCAu	|||| ||: |||||||	ugaAUUGGACCGAAGGCCUGAGUu	1
MIMAT0019950	hsa-miR-25-3p	ENSG00000229807	XIST	lincRNA	chrX	73046776	73046796	-	6	0	AGO2	7mer-m8	aaaUUCACUAGAUUUCCGGAu	|| ||: | :|||||||	cugAAUUGGACCGAAGGCCUg	0
MIMAT0015011	hsa-miR-92b-3p	ENSG00000229807	XIST	lincRNA	chrX	73046776	73046797	-	6	0	AGO2	7mer-m8	agACUU-CCAAGUCUUUCCGGAa	|||| | | | |||||||	ccUGAAUUGGACCG-AAGGCCUg	0
MIMAT0022701	hsa-miR-367-3p	ENSG00000229807	XIST	lincRNA	chrX	73046790	73046811	-	6	0	AGO2	7mer-m8	aauucauuguggaaGGACUUAu	|||||||	aaaacagaggguggCCUGAAUu	0
MIMAT0002835	hsa-miR-4436a	ENSG00000229807	XIST	lincRNA	chrX	73046817	73046839	-	6	1	AGO2	7mer-m8	ugucuuucacgaagGGAGUUCUc	||||||||	gaaaccaacaaaagCCUCAAGAg	1
MIMAT0015008	hsa-miR-5000-3p	ENSG00000229807	XIST	lincRNA	chrX	73046824	73046846	-	6	0	AGO2	7mer-m8	ugaUGGACUUAAG-GGUUUUCGa	:|||||| | |||||||	cagGCCUGAAACCAACAAAAGCc	3
MIMAT0015087	hsa-miR-1197	ENSG00000229807	XIST	lincRNA	chrX	73046894	73046915	-	7	0	AGO2	7mer-m8	uaCUAACGGAGGGAGAACUCUu	||| |::| |||||||	caGAUGGUUUGAGACUUGAGAc	0
MIMAT0005789	hsa-miR-3613-5p	ENSG00000229807	XIST	lincRNA	chrX	73046894	73046920	-	7	0	AGO2	7mer-m8	uaUUUG-CUGUGGAG----GAACUCUu	|:|| ||:: :|: |||||||	uaAGACAGAUGGUUUGAGACUUGAGAc	0
MIMAT0004687	hsa-miR-432-5p	ENSG00000229807	XIST	lincRNA	chrX	73046902	73046921	-	7	0	AGO2	8mer	ucacgggggUGUCAAACUCa	|::|||||||	auaagacagAUGGUUUGAGa	1
MIMAT0005794	hsa-miR-4735-3p	ENSG00000229807	XIST	lincRNA	chrX	73046991	73047012	-	6	3	AGO2	7mer-m8	ccUCUACCUCGGUCCCGGGAUu	||| | || |||||||	caAGACCAAAACAAGGCCCUAg	1
MIMAT0022483	hsa-miR-18a-5p	ENSG00000229807	XIST	lincRNA	chrX	73047059	73047080	-	6	0	AGO2	8mer	cgaaagAGCCUCGAGUCUCGUu	|||| ||||||||	agaacgUCGGCUAUCAGAGCAa	1
MIMAT0027511	hsa-miR-18b-5p	ENSG00000229807	XIST	lincRNA	chrX	73047059	73047081	-	6	0	AGO2	8mer	gaccccCGCCCCCUCGUCUCGUu	|: || | |||||||	cagaacGUCGGCUAUCAGAGCAa	1
MIMAT0002871	hsa-miR-4782-3p	ENSG00000229807	XIST	lincRNA	chrX	73047079	73047103	-	7	0	AGO2	7mer-m8	gucUUAGGAACGG---GUCCACGUa	|| || |||| :|||||||	ccuAACCCCUGCCUGAUAGGUGCAg	4
MIMAT0003880	hsa-miR-219a-5p	ENSG00000229807	XIST	lincRNA	chrX	73047101	73047123	-	7	0	AGO2	7mer-m8	gaggucggggaggUCCCGAAGGa	:||||||||	cauguguggcagaGGGGCUUCCu	3
MIMAT0003393	hsa-miR-6766-3p	ENSG00000229807	XIST	lincRNA	chrX	73047120	73047140	-	7	2	AGO2	7mer-m8	aguUGCCCUCACUAGCACAGUAa	||| | ||| :|||||||	uguACGUGUGUG--UGUGUCAUg	3
MIMAT0018943	hsa-miR-3690	ENSG00000229807	XIST	lincRNA	chrX	73047167	73047187	-	9	0	AGO1,AGO2	8mer	cgAGGUACAAGGGCAGAGGAAc	|:||||| :| |||||||	auUUCAUGUAAUC-UCUCCUUa	0
MIMAT0016858	hsa-miR-377-3p	ENSG00000229807	XIST	lincRNA	chrX	73047169	73047185	-	9	0	AGO1,AGO2	7mer-m8	augacggaaAGAGAGGu	|||||||	uucauguaaUCUCUCCu	1
MIMAT0000455	hsa-miR-1295a	ENSG00000229807	XIST	lincRNA	chrX	73047169	73047190	-	9	0	AGO1,AGO2	7mer-m8	aguccuugacggaaAGAGAGGu	|||||||	uugauuucauguaaUCUCUCCu	4
MIMAT0019704	hsa-miR-423-5p	ENSG00000229807	XIST	lincRNA	chrX	73047169	73047193	-	9	0	AGO1,AGO2	7mer-m8	gaAGAC-AGAG-AAAAGAGAGAGGu	|:|| |:|| | | |||||||	ucUUUGAUUUCAUGUAAUCUCUCCu	1
MIMAT0002175	hsa-miR-3184-5p	ENSG00000229807	XIST	lincRNA	chrX	73047213	73047233	-	6	0	AGO2	7mer-m8	cuuAAGUAGUGCCGGUCGGAGa	|| | :|: :|||||||	ccuUUGAGUAU-UUCAGCCUCu	2
MIMAT0027668	hsa-miR-122-5p	ENSG00000229807	XIST	lincRNA	chrX	73047213	73047234	-	8	0	AGO2	7mer-m8	guuguAGUGGAAGAGUCGGAGa	| | : |:||||||||	accuuUGAGUAUUUCAGCCUCu	1
MIMAT0004916	hsa-miR-574-5p	ENSG00000229807	XIST	lincRNA	chrX	73047224	73047240	-	8	0	AGO2	8mer	acUGACUGUCGAAAAACUCAu	||| || | |||||||	cuACU--CACC--UUUGAGUa	1
MIMAT0000736	hsa-miR-3196	ENSG00000229807	XIST	lincRNA	chrX	73047262	73047282	-	8	0	AGO2	7mer-m8	ugucucucgAACGGGAACAUAu	||| |||||||	uaaucucugUUG-GCUUGUAUu	1
MIMAT0004903	hsa-miR-3180	ENSG00000229807	XIST	lincRNA	chrX	73047262	73047285	-	8	0	AGO2	7mer-m8	ucucucucAGACGG--GAACAUAu	||||:: |||||||	uauuaaucUCUGUUGGCUUGUAUu	0
MIMAT0000318	hsa-miR-3180-3p	ENSG00000229807	XIST	lincRNA	chrX	73047281	73047303	-	9	0	AGO2	8mer	aguaguAAUGGU-CCGUCAUAAu	|| |:| |||||||	ugugauUUUCUAUUUCAGUAUUa	1
MIMAT0001536	hsa-miR-6816-5p	ENSG00000229807	XIST	lincRNA	chrX	73047281	73047303	-	9	0	AGO2	8mer	ugcCAAAAUGGU-CUGUCAUAAu	| ||| |:| |||||||	uguGAUUUUCUAUUUCAGUAUUa	2
MIMAT0000617	hsa-miR-1908-5p	ENSG00000229807	XIST	lincRNA	chrX	73047281	73047305	-	9	0	AGO2	8mer	agGUAGUAAUGG--GCCGUCAUAAu	::| ||| :| : |||||||	uuUGUGAUUUUCUAUUUCAGUAUUa	2
MIMAT0014983	hsa-miR-663a	ENSG00000229807	XIST	lincRNA	chrX	73047288	73047310	-	9	0	AGO2	7mer-m8	acaggAAACG-GAUGAGAUAAAu	||||: | :|||||||	ugcugUUUGUGAUUUUCUAUUUc	2
MIMAT0018003	hsa-miR-6787-5p	ENSG00000229807	XIST	lincRNA	chrX	73047320	73047340	-	7	0	AGO2	7mer-m8	gaGUGGACUCGAGGGCACGGAc	| ||| || |||||||	cuCUCCUCCCCU-GCGUGCCUc	1
MIMAT0019948	hsa-miR-625-5p	ENSG00000229807	XIST	lincRNA	chrX	73047332	73047349	-	7	0	AGO2	7mer-m8	agUCAGGGUCGUAGAGGAGu	| ||:| : |||||||	cuAUUCUC--UCUCUCCUCc	2
MIMAT0018194	hsa-miR-140-5p	ENSG00000229807	XIST	lincRNA	chrX	73047332	73047352	-	7	0	AGO2	7mer-m8	gguuggagcugcuAGAGGAGu	|||||||	gggcuauucucucUCUCCUCc	0
MIMAT0016858	hsa-miR-675-3p	ENSG00000229807	XIST	lincRNA	chrX	73047334	73047350	-	7	0	AGO2	7mer-m8	augacGGAAAGAGAGGu	:|| |||||||	gcuauUCUCUCUCUCCu	1
MIMAT0000455	hsa-miR-491-5p	ENSG00000229807	XIST	lincRNA	chrX	73047334	73047356	-	7	0	AGO2	7mer-m8	agucCUUGA-CGGAAAGAGAGGu	|::|| :|| |||||||	ucuuGGGCUAUUCUCUCUCUCCu	4
MIMAT0019704	hsa-miR-942-5p	ENSG00000229807	XIST	lincRNA	chrX	73047334	73047356	-	7	0	AGO2	7mer-m8	gaAGACAGAGAAAAGAGAGAGGu	|: | || || |||||||||	ucUUGGGCUAUUCUCUCUCUCCu	1
MIMAT0003242	hsa-miR-139-5p	ENSG00000229807	XIST	lincRNA	chrX	73047390	73047410	-	11	0	AGO1,AGO2	7mer-m8	gucCAUGGUUAUAAAAUAGAu	|| :| | ||||||||	gcuGUUUCUACUUUUUAUCUc	2
MIMAT0015056	hsa-miR-511-3p	ENSG00000229807	XIST	lincRNA	chrX	73047463	73047484	-	7	1	AGO2	7mer-m8	ugCAAAUUUAAAGUGGGGAAGa	| ||| | |:||||||||	guGAUUAUUUGUUACCCCUUCc	0
MIMAT0000084	hsa-miR-410-3p	ENSG00000229807	XIST	lincRNA	chrX	73047480	73047501	-	9	1	AGO1,AGO2	7mer-m8	cgccuuGAAUCG-GUGACACUu	||| |: |||||||	uuuucuCUUUGUGAACUGUGAu	8
MIMAT0000419	hsa-miR-483-3p	ENSG00000229807	XIST	lincRNA	chrX	73047480	73047501	-	9	1	AGO1,AGO2	7mer-m8	cgucuuGAAUCG-GUGACACUu	||| |: |||||||	uuuucuCUUUGUGAACUGUGAu	1
MIMAT0019036	hsa-miR-409-3p	ENSG00000229807	XIST	lincRNA	chrX	73047503	73047520	-	11	0	AGO1,AGO2	7mer-m8	uucuuuGAU-GAUGGAGu	||: |||||||	cuuucuCUGCCUACCUCu	0
MIMAT0018980	hsa-miR-150-5p	ENSG00000229807	XIST	lincRNA	chrX	73047503	73047521	-	11	0	AGO1,AGO2	7mer-m8	aaGAAGGUGUGGAUGGAGa	:|||: ::||||||||	ccUUUCUCUGCCUACCUCu	0
MIMAT0000064	hsa-miR-512-3p	ENSG00000229807	XIST	lincRNA	chrX	73047503	73047523	-	11	0	AGO1,AGO2	7mer-m8	uuGGUAUGUUGGAU-GAUGGAGu	|| | | :||: |||||||	cuCCUUUC--UCUGCCUACCUCu	4
MIMAT0000066	hsa-miR-941	ENSG00000229807	XIST	lincRNA	chrX	73047503	73047524	-	11	0	AGO1,AGO2	7mer-m8	uugauauguuGGAGGAUGGAGu	|: ||||||||	ucuccuuucuCUGCCUACCUCu	2
MIMAT0000096	hsa-miR-3127-5p	ENSG00000229807	XIST	lincRNA	chrX	73047503	73047524	-	11	0	AGO1,AGO2	7mer-m8	uuguuauguuGAAUGAUGGAGu	|| |||||||	ucuccuuucuCUGCCUACCUCu	3
MIMAT0000062	hsa-miR-4640-3p	ENSG00000229807	XIST	lincRNA	chrX	73047503	73047525	-	11	0	AGO1,AGO2	7mer-m8	uugauauguuGGAU-GAUGGAGu	:||: |||||||	cucuccuuucUCUGCCUACCUCu	1
MIMAT0000063	hsa-miR-576-5p	ENSG00000229807	XIST	lincRNA	chrX	73047503	73047525	-	11	0	AGO1,AGO2	7mer-m8	uugguguguuGGAU-GAUGGAGu	:||: |||||||	cucuccuuucUCUGCCUACCUCu	1
MIMAT0000065	hsa-miR-514a-5p	ENSG00000229807	XIST	lincRNA	chrX	73047503	73047525	-	11	0	AGO1,AGO2	7mer-m8	uugauacguuGGAU-GAUGGAGa	:||: |||||||	cucuccuuucUCUGCCUACCUCu	4
MIMAT0000067	hsa-miR-204-5p	ENSG00000229807	XIST	lincRNA	chrX	73047503	73047525	-	11	0	AGO1,AGO2	7mer-m8	uugauauguuAGAU-GAUGGAGu	|||: |||||||	cucuccuuucUCUGCCUACCUCu	1
MIMAT0000414	hsa-miR-211-5p	ENSG00000229807	XIST	lincRNA	chrX	73047503	73047525	-	11	0	AGO1,AGO2	7mer-m8	uugacauguuuGAU-GAUGGAGu	||: |||||||	cucuccuuucuCUGCCUACCUCu	4
MIMAT0000415	hsa-miR-3617-5p	ENSG00000229807	XIST	lincRNA	chrX	73047503	73047525	-	11	0	AGO1,AGO2	7mer-m8	uugucguguuuGAU-GAUGGAGu	||: |||||||	cucuccuuucuCUGCCUACCUCu	2
MIMAT0018943	hsa-miR-641	ENSG00000229807	XIST	lincRNA	chrX	73047517	73047537	-	10	0	AGO1,AGO2	7mer-m8	cgAGGUACAAGGGCAGAGGAAc	|:| ||| : | |||||||	ugUUC-UGUCUACCUCUCCUUu	0
MIMAT0019036	hsa-miR-19b-3p	ENSG00000229807	XIST	lincRNA	chrX	73047522	73047539	-	10	0	AGO1,AGO2	7mer-m8	uucuuuGAU-GAUGGAGu	||: |||||||	cuuguuCUGUCUACCUCu	0
MIMAT0018980	hsa-miR-19a-3p	ENSG00000229807	XIST	lincRNA	chrX	73047522	73047541	-	10	0	AGO1,AGO2	7mer-m8	aaGAA-GGUGUGGAUGGAGa	||| :: :::|||||||	uuCUUGUUCUGUCUACCUCu	0
MIMAT0000066	hsa-miR-6875-5p	ENSG00000229807	XIST	lincRNA	chrX	73047522	73047543	-	10	0	AGO1,AGO2	7mer-m8	uugauauguuGGAGGAUGGAGu	|: :|||||||	uuuucuuguuCUGUCUACCUCu	2
MIMAT0000096	hsa-miR-3126-5p	ENSG00000229807	XIST	lincRNA	chrX	73047522	73047543	-	10	0	AGO1,AGO2	7mer-m8	uuguuauguuGAAUGAUGGAGu	|| |||||||	uuuucuuguuCUGUCUACCUCu	3
MIMAT0000062	hsa-miR-7853-5p	ENSG00000229807	XIST	lincRNA	chrX	73047522	73047544	-	10	0	AGO1,AGO2	7mer-m8	uugauauguuGGAU-GAUGGAGu	:||: |||||||	cuuuucuuguUCUGUCUACCUCu	1
MIMAT0000063	hsa-miR-105-5p	ENSG00000229807	XIST	lincRNA	chrX	73047522	73047544	-	10	0	AGO1,AGO2	7mer-m8	uugguGUGUUGGAU-GAUGGAGu	| :: :||: |||||||	cuuuuCUUGUUCUGUCUACCUCu	1
MIMAT0000064	hsa-miR-516b-5p	ENSG00000229807	XIST	lincRNA	chrX	73047522	73047544	-	10	0	AGO1,AGO2	7mer-m8	uugguauguuGGAU-GAUGGAGu	:||: |||||||	cuuuucuuguUCUGUCUACCUCu	4
MIMAT0000065	hsa-miR-676-3p	ENSG00000229807	XIST	lincRNA	chrX	73047522	73047544	-	10	0	AGO1,AGO2	7mer-m8	uugauacguuGGAU-GAUGGAGa	:||: |||||||	cuuuucuuguUCUGUCUACCUCu	4
MIMAT0000067	hsa-miR-518f-3p	ENSG00000229807	XIST	lincRNA	chrX	73047522	73047544	-	10	0	AGO1,AGO2	7mer-m8	uugauauguuAGAU-GAUGGAGu	|||: |||||||	cuuuucuuguUCUGUCUACCUCu	1
MIMAT0000414	hsa-miR-518b	ENSG00000229807	XIST	lincRNA	chrX	73047522	73047544	-	10	0	AGO1,AGO2	7mer-m8	uugacauguuuGAU-GAUGGAGu	||: |||||||	cuuuucuuguuCUGUCUACCUCu	4
MIMAT0000415	hsa-miR-518c-3p	ENSG00000229807	XIST	lincRNA	chrX	73047522	73047544	-	10	0	AGO1,AGO2	7mer-m8	uugucguguuuGAU-GAUGGAGu	||: |||||||	cuuuucuuguuCUGUCUACCUCu	2
MIMAT0000733	hsa-miR-518d-3p	ENSG00000229807	XIST	lincRNA	chrX	73047524	73047541	-	10	0	AGO1,AGO2	7mer-m8	ggauGCAAGGUAUCAGAUGGu	:||||: |||||||	uucuUGUUCU---GUCUACCu	2
MIMAT0019828	hsa-miR-518a-3p	ENSG00000229807	XIST	lincRNA	chrX	73047524	73047545	-	10	0	AGO1,AGO2	7mer-m8	uuguuguuuaGGGUCAGAUGGa	::| |||||||	ccuuuucuugUUCUGUCUACCu	1
MIMAT0027571	hsa-miR-483-5p	ENSG00000229807	XIST	lincRNA	chrX	73047549	73047572	-	7	0	AGO2	7mer-m8	gaCCCUCUGU-CUUUUCACGAAAa	||| ||| | : |||||||	uuGGGUCACAUGCUGUGUGCUUUu	0
MIMAT0018943	hsa-miR-182-5p	ENSG00000229807	XIST	lincRNA	chrX	73047573	73047593	-	9	1	AGO1,AGO2	7mer-m8	cgAGGUACAAGGGCAGAGGAAc	|::|| ||| :||||||||	gcUUUAU-UUCAUGUCUCCUUu	0
MIMAT0004929	hsa-miR-126-3p	ENSG00000229807	XIST	lincRNA	chrX	73047653	73047673	-	10	0	AGO1,AGO2	7mer-m8	uuGGGUUAUAGUUUGUAUAGu	:|: :| |:|:|||||||	ugUCUUGUCUUAGACAUAUCu	2
MIMAT0000458	hsa-miR-508-3p	ENSG00000229807	XIST	lincRNA	chrX	73047653	73047674	-	10	0	AGO1,AGO2	7mer-m8	uggauuAUAUAGUUUGUAUAGu	|:| |:|:|||||||	gugucuUGUCUUAGACAUAUCu	1
MIMAT0000422	hsa-miR-4731-5p	ENSG00000229807	XIST	lincRNA	chrX	73047710	73047728	-	6	0	AGO2	7mer-m8	ccGUAAGUGGCGCACGGAAu	| |||: :|:|||||||	uuCUUUCG-UGUGUGCCUUu	1
MIMAT0002878	hsa-miR-3146	ENSG00000229807	XIST	lincRNA	chrX	73047710	73047730	-	6	0	AGO2	7mer-m8	agAUGAGUCUUCCCACGGAAu	| ||: : | |||||||	auUUCUUUCGUGUGUGCCUUu	0
MIMAT0002816	hsa-miR-140-3p	ENSG00000229807	XIST	lincRNA	chrX	73047738	73047761	-	7	1	AGO2	7mer-m8	cuccAAAGGGCACA--UACAAAGu	|| ||| | | |||||||	ugucUUACCCAUUUCCAUGUUUCu	2
MIMAT0005930	hsa-miR-103a-3p	ENSG00000229807	XIST	lincRNA	chrX	73047778	73047797	-	4	0	AGO2	7mer-m8	acAGAGGUGUCCCGAGAAAu	|||: | |||||||	uuUCUUGUCUUUGCUCUUUg	3
MIMAT0005931	hsa-miR-107	ENSG00000229807	XIST	lincRNA	chrX	73048919	73048935	-	6	0	AGO1,AGO2	7mer-m8	uuCGUACCUUCGUGAAu	||| |||||||	ugGCACUCUAGCACUUg	0
MIMAT0000717	hsa-miR-4662a-5p	ENSG00000229807	XIST	lincRNA	chrX	73048919	73048939	-	6	0	AGO1,AGO2	7mer-m8	gguGACUUUGUACCUUCGUGAAu	|||: || | |||||||	ugcCUGGCAC-U-CUAGCACUUg	4
MIMAT0002825	hsa-miR-197-3p	ENSG00000229807	XIST	lincRNA	chrX	73048919	73048939	-	6	0	AGO1,AGO2	7mer-m8	gggaguuuuuccuUCGUGAAa	|||||||	ugccuggcacucuAGCACUUg	1
MIMAT0002843	hsa-miR-148a-3p	ENSG00000229807	XIST	lincRNA	chrX	73048919	73048939	-	6	0	AGO1,AGO2	7mer-m8	gggagauuuuccuUCGUGAAa	|||||||	ugccuggcacucuAGCACUUg	3
MIMAT0000724	hsa-miR-152-3p	ENSG00000229807	XIST	lincRNA	chrX	73048919	73048940	-	6	0	AGO1,AGO2	7mer-m8	ugCGAGUUUACAGCGUCGUGAAa	|| ::: || :|||||||	auGCCUGGCACUC-UAGCACUUg	1
MIMAT0002834	hsa-miR-148b-3p	ENSG00000229807	XIST	lincRNA	chrX	73048919	73048940	-	6	0	AGO1,AGO2	7mer-m8	ugucagguuucccuUCGUGAAa	|||||||	augccuggcacucuAGCACUUg	1
MIMAT0002846	hsa-miR-374c-3p	ENSG00000229807	XIST	lincRNA	chrX	73048919	73048940	-	6	0	AGO1,AGO2	7mer-m8	ugggagauuuuccuUCGUGAAa	|||||||	augccuggcacucuAGCACUUg	3
MIMAT0002856	hsa-miR-3194-3p	ENSG00000229807	XIST	lincRNA	chrX	73048919	73048940	-	6	0	AGO1,AGO2	7mer-m8	ugggugguuucucuUCGUGAAa	|||||||	augccuggcacucuAGCACUUg	1
MIMAT0000715	hsa-miR-6746-3p	ENSG00000229807	XIST	lincRNA	chrX	73048919	73048941	-	6	0	AGO1,AGO2	7mer-m8	gaugauuuuguaccuUCGUGAAu	|||||||	caugccuggcacucuAGCACUUg	0
MIMAT0000718	hsa-miR-6799-3p	ENSG00000229807	XIST	lincRNA	chrX	73048919	73048941	-	6	0	AGO1,AGO2	7mer-m8	ugugaGUUUGUACCUUCGUGAAu	| ::|| |||||||	caugcCUGGCACUCUAGCACUUg	0
MIMAT0000726	hsa-miR-3173-5p	ENSG00000229807	XIST	lincRNA	chrX	73048919	73048941	-	6	0	AGO1,AGO2	7mer-m8	ugugGGGUUUUAGCUUCGUGAAg	||::: | : |||||||	caugCCUGGCACUCUAGCACUUg	2
MIMAT0000722	hsa-miR-1249-3p	ENSG00000229807	XIST	lincRNA	chrX	73048994	73049015	-	8	1	AGO2	7mer-m8	ugguccaagguGGGGUCGUCCg	|::|||||||	gagagcugaguCUUCAGCAGGu	1
MIMAT0027687	hsa-miR-525-5p	ENSG00000229807	XIST	lincRNA	chrX	73048994	73049017	-	8	1	AGO2	7mer-m8	gaccgUCCACUU--CCGUCGUCCc	|| |||: |||||||	cagagAGCUGAGUCUUCAGCAGGu	0
MIMAT0000222	hsa-miR-520a-5p	ENSG00000229807	XIST	lincRNA	chrX	73050974	73050993	-	6	0	AGO2	7mer-m8	ccgacaGUUAAGUAUCCAGUc	||| | |||||||	gggcaaCAA-CCCUAGGUCAg	2
MIMAT0000272	hsa-miR-6512-3p	ENSG00000229807	XIST	lincRNA	chrX	73050974	73050993	-	6	0	AGO2	7mer-m8	cagacaGUUAAGUAUCCAGUa	||| | |||||||	gggcaaCAA-CCCUAGGUCAg	2
MIMAT0004679	hsa-miR-6720-5p	ENSG00000229807	XIST	lincRNA	chrX	73050980	73051001	-	6	0	AGO2	8mer	ccucucggagguggGUUGGGAg	|||||||	cuaccacugggcaaCAACCCUa	1
